# Supplementary material
Source: Royal Society of Chemistry journal article supplement (doi:10.1039/d6em00202a)
Supplement: d6em00202a2.xlsx [file d6em00202a2.xlsx]

## Sheet: Cover
Supporting Information
Chemical Emissions from Organic Light-Emitting Diode Screens during Use and Thermal Treatment
Yunhe Guo,a,b Yi Wang,c,b Yanna Liu,b,* Yuhao Yand Kun Zhang,e Guangbo Qu,b,c Guibin Jianga,b,c
a Key Laboratory of Environment Remediation and Ecological Health, Ministry of Education, College of Environmental and Resource Sciences, Zhejiang University, Hangzhou, 310058, China
b State Key Laboratory of Environmental Chemistry and Ecotoxicology, Research Center for Eco-Environmental Sciences, Chinese Academy of Sciences, Beijing, 100085, China
c Institute of Environment and Health, Hangzhou Institute for Advanced Study, UCAS, Hangzhou 310000, China
d Institute of Health Inspection and Testing, Tianjin Centers for Disease Control and Prevention, Tianjin 300011, China
e State Environmental Protection Key Laboratory of Environmental Health Impact Assessment of Emerging Contaminants, School of Environmental Science and Engineering, Shanghai Jiao Tong University, Shanghai, 200240, China
*Corresponding Author：
Yanna Liu: ynliu@rcees.ac.cn
Number of Tables: 8 (presented in Excel)

## Sheet: Table S1 Standards
Table S1. Information on the standards used in the experiment
No.	Compounds	CAS. No.	Suppliers	Purity
Unlabelled compound standards
1	1-ethyl-2-methylbenzene	611-14-3	DRE	0.9888
2	1,2,3-trimethylbenzene	526-73-8	DRE	0.9353
3	1-methyl-4-propylbenzene	1074-55-1	DRE	0.979
4	cyclopropylbenzene	873-49-4	TCI	0.98
5	1,2,3,5-tetramethylbenzene	527-53-7	DRE	0.8775
6	1,2,3,4,5-pentamethylbenzene	700-12-9	DRE	0.992
7	1-methyl-2-phenylbenzene	643-58-3	Chemservice	0.995
8	1,4-diacetylbenzene	1009-61-6	Chemservice	not available
9	nonylbenzene	1081-77-2	DRE	0.983
10	Benzophenone	119-61-9	DRE	0.9985
11	2,6-diisopropylnaphthalene	24157-81-1	DRE	0.9913
12	2-phenoxyethoxybenzene	104-66-5	Chemservice	0.995
13	naphthalene	91-20-3	DRE	0.9942
14	phenanthrene	85-01-8	DRE	0.9752
15	Dimethyl phthalate	131-11-3	DRE	0.999
16	Diethyl phthalate	84-66-2	DRE	0.9941
17	Diisobutyl phthalate	84-69-5	DRE	0.9961
18	Di-n-butyl phthalate	84-74-2	DRE	0.9948
19	Diphenyl phthalate	84-62-8	DRE	0.995
20	Bis(2-ethylhexyl) phthalate	117-81-7	DRE	0.9931
21	Di-n-octyl phthalate	117-84-0	DRE	0.9907
labelled Internal Standard
1	Naphthalene D8	1146-65-2	DRE	0.9839
2	Dibutyl phthalate D4	93952-11-5	DRE	0.991

## Sheet: Table S2 Normal operation chem
Table S2. Features/compounds with S/N ≥ 1.5 relative to the background (blank) sample in the 7-day normal-operation experiment.
No	Feature No.	Name	Calc. MW	RT [min]	NIST Lib Hit Formula	structure group	sub group	NIST Theo. Mol. Mass	NIST Observed Mol. Mass	Total Score	HRF Score	RHRF Score	SI	RSI	Calculated RI	Experimental RI or Predicted RI	RI Delta (%)		Blue	Green	White	Red	the number of samples the chemical is detected
	CL1																		Total Mass Detected (ng in 7-day)
1	Features72	1-ethyl-2-methylbenzene		4	C9H12	benzene-derivatives	alkylbenzene												137.745	409.555	555.139	402.138	4
2	Features81	1,2,3-trimethylbenzene		4.09	C9H12	benzene-derivatives	alkylbenzene												670.633	789.647	550.593	393.593	4
3	Features139	1-methyl-4-propylbenzene		5.28	C10H14	benzene-derivatives	alkylbenzene												416.764	689.899	739.609	465.045	4
4	Features210	1,2,3,5-tetramethylbenzene		6.44	C10H14	benzene-derivatives	alkylbenzene												315.989	556.185	671.811	520.01	4
5	Features899	Dimethyl phthalate		13.08	C10H10O4	phthalate acid esters	phthalate acid esters												11735.9	5995.48	9370.11	4898.24	4
6	Features1209	Diethyl phthalate		15.86	C12H14O4	phthalate acid esters	phthalate acid esters												547.378	143.873	274.924	125.105	4
7	Features332	naphthalene		7.778	C10H8	polycyclic aromatic hydrocarbons	polycyclic aromatic hydrocarbons												14463.5	4858.58	5072.54	6010.04	4
8	Features1488	phenanthrene		19.56	C14H10	polycyclic aromatic hydrocarbons	polycyclic aromatic hydrocarbons												309.305	136.227	265.071	141.183	4
9	Features1564	Diisobutyl phthalate		20.75	C16H22O4	phthalate acid esters	phthalate acid esters												22606.1	8629.97	15270.5	8919.69	4
10	Features1631	Di-n-butyl phthalate		22.32	C16H22O4	phthalate acid esters	phthalate acid esters												39121.3	13604.8	25232.1	13967.1	4
11	Features2082	Di-n-octyl phthalate		32.27	C24H38O4	phthalate acid esters	phthalate acid esters												598.621	455.251	128.132	85.5823	4
12	Features1970	Bis(2-ethylhexyl) phthalate		30.612	C24 H38 O4	phthalate acid esters	phthalate acid esters												11571.5	12676	5542.71	4943.63	4
	CL2																		Internal Standard-Corrected Peak Area
1	Features27	2(3H)-Furanone, dihydro-4,5-dimethyl-	99.0443	3.283	C6 H10 O2	benzene-derivatives	ketone	114.068		99.9	92	100	935	994	929	979.162	0.0512299			34699	191046	78272	3
2	Features80	2-Butanone, 1-(2-furanyl)-	148.918	4.087	C8 H10 O2	benzene-derivatives	ketone	138.068		95.6	90.7	94.8	811	880	989	1031.01	0.0407429			2289832	1336897	1791935	3
3	Features152	2-Decene, 4-methyl-, (Z)-	111.117	5.504	C11 H22	others	alkene	154.172		96.6	100	100	829	829	1071	1052.9	0.0171874			7911251	6021658	2517880	3
4	Features189	1-Nonene, 4,6,8-trimethyl-	71.0859	6.11	C12 H24	others	alkane	168.187		99.5	99.1	99	947	992	1104	1060.75	0.0110806			73648763	65897987	36438555	3
5	Features190	Benzene, 1-ethyl-2,4-dimethyl-	134.109	6.148	C10 H14	benzene-derivatives	alkylbenzene	134.109	134.109	99.1	93.6	100	872	952	1107	1081.86	0.0525611		28299	774439	542767	651176	4
6	Features221	Benzene, 1,2-dichloro-4-methyl-	159.984	6.494	C7 H6 Cl2	benzene-derivatives	alkylbenzene	159.984	159.984	98	96.8	98.6	910	926	1124	1134.88	0.00958622		871148	17672932	15458841	2618680	4
7	Features254	(3aR,7aR)-2,3,3a,4,5,6,7,7a-octahydro-1H-indole	123.117	6.752	C8 H15 N	others	indole	125.12		92.3	83.9	100	769	954	1137	1125.52	0.0101992			189576	139517	194280	3
8	Features268	Benzene, 1-chloro-2-(chloromethyl)-	159.984	6.914	C7 H6 Cl2	benzene-derivatives	alkylbenzene	159.984	159.984	99.3	85.8	100	854	966	1146	1171.11	0.0214418		16628	166266	165391	143365	4
9	Features280	4,6-Octadiyn-3-one, 2-methyl-	122.036	7.062	C9 H10 O	others	ketone	134.073		98.3	89.3	100	769	916	1153	1145.28	0.00674291		413215	2029052	693894	1855838	4
10	Features373	1,2-Benzisothiazole	135.014	8.573	C7 H5 N S	benzene-derivatives	thiazole	135.014	135.013	99.4	97.1	100	934	971	1228	1218.27	0.00798392		2678280	8366249	8338074	7641851	4
11	Features405	Benzene, 1,5-dimethyl-2,4-bis(1-methylethyl)-	190.171	8.993	C14 H22	benzene-derivatives	alkylbenzene	190.172	190.171	98.9	99.1	99.1	801	961	1249	1338.04	0.0665431			2614245	2486702	1931728	3
12	Features408	1H-Indene, 2,3-dihydro-4,6-dimethyl-	146.109	9.047	C11 H14	benzene-derivatives	alkylbenzene	146.109	146.108	97.6	93.7	100	878	881	1251	1237.11	0.0112256		391450	1289903	1332243	1171892	4
13	Features575	Benzene, 1-(1,1-dimethylethyl)-4-ethenyl-	160.125	10.542	C12 H16	benzene-derivatives	alkylbenzene	160.125	160.124	97	87.8	96.9	805	913	1323	1204.09	0.0987555		1257465	2738878	2712664	1413609	4
14	Features632	1-Phenyl-3-buten-1-one	133.029	11.005	C10 H10 O	benzene-derivatives	ketone	146.073		99.2	92.7	100	886	959	1345	1227.55	0.0956819		470222	879414	771286	758559	4
15	Features736	Biphenyl	154.078	11.764	C12 H10	benzene-derivatives	Biphenyl	154.078	154.077	97.4	92.7	97.8	875	912	1381	1379.62	0.000997518			2308544		2097552	2
16	Features762	N-Benzyl-N-methylformamide	149.084	12.02	C9 H11 N O	benzene-derivatives	amide	149.084	149.083	98.6	99.9	100	818	929	1393	1331.07	0.0465277			310982			1
17	Features845	1-(methoxymethyl)-4-methyl-naphthalene	167.179	12.599	C13 H14 O	phthalate acid esters	phthalate acid esters	186.104		98.1	88.8	98.8	834	928	1422	1567.49	0.0928191			9537935		9761747	2
18	Features875	Phenanthrene, tetradecahydro-	192.187	12.88	C14 H24	phthalate acid esters	phthalate acid esters	192.187	192.187	99.7	86.9	100	829	982	1435	1527.45	0.0605266		1857551	3103735			2
19	Features1049	Benzaldehyde, 5-(1,1-dimethylethyl)-2-methyl-	176.12	14.434	C12 H16 O	benzene-derivatives	ketone	176.12	176.119	99	92.5	100	787	950	1512	1376.43	0.0984913			2397929			1
20	Features1134	Naphthalene, 1,4,5-trimethyl-	170.109	15.211	C13 H14	phthalate acid esters	phthalate acid esters	170.109	170.108	98	86.1	100	815	897	1552	1532.05	0.0130216		1165260	1749396	768209	1668750	4
21	Features1208	Benzaldehyde, 3,5-bis(1,1-dimethylethyl)-4-hydroxy-	234.161	15.842	C15 H22 O2	benzene-derivatives	phenol	234.161	234.161	98.4	99.8	100	811	919	1584	1759.21	0.0995951			3946952	3777300	2961807	3
22	Features1362	2,6-Di-tert-butyl-4-nitrophenol	251.151	17.586	C14 H21 N O3	benzene-derivatives	phenol	251.152	251.151	98.1	98.6	99.9	889	904	1677	1791.27	0.063792			4198284	4563138		2
23	Features1546	(Cyclohexyldisulfanyl)cyclohexane	230.116	20.44	C12 H22 S2	others	alkane	230.116	230.115	98.6	98.9	100	906	929	1838	1759.93	0.0443575			13703269	4885653		2
24	Features1596	2,2',3,3'-tetrachloro-1,1'-biphenyl	289.922	21.458	C12 H6 Cl4	benzene-derivatives	biphenyl	289.922	289.921	97.2	89.5	98.4	894	894	1898	2026.03	0.0631946		2581014	2287346			2
25	Features1868	Cyclopentane, 1,1'-[3-(2-cyclopentylethyl)-1,5-pentanediyl]bis-	111.117	28.883	C22 H40	others	alkane	304.312		99.2	93.2	100	860	957	2396	2257.92	0.0611554			77538733			1
26	Features1972	(1R,2aS,2bS,2cS,5aS,5bR,5cR)-Decahydro-1-[(2-methoxyethoxy)methoxy]-4,4,5d-trimethyl-2H-cyclopenta[a]cyclopropa[cd]pentalen-2-one	277.18	30.615	C24 H38 O4	others	ketone	390.276		97.9	98.5	98.5	925	925	2528	2541.29	0.00523108			4084670723		1530028157	2
27	Features2109	2,2'-Biphenol, 3,3',5,5'-tetrakis(1,1-dimethylethyl)-	410.317	32.669	C28 H42 O2	benzene-derivatives	biphenyl	410.318	410.317	99.3	88.3	100	769	963	2693	2682.62	0.00386756				42320957		1
28	Features106	Benzene, 1-ethyl-2,4-dimethyl-	134.109	4.682	C10 H14	benzene-derivatives	alkylbenzene	134.109	134.109	98.6	99.3	100	837	930	1025	1081.86	0.0525611			1708938	872076	1155886	3
29	Features127	1-Nonene, 4,6,8-trimethyl-	126.14	5.113	C12 H24	others	alkane	168.187		99.6	99.5	100	756	977	1049	1060.75	0.0110806			26123744	18732393	12787346	3
30	Features774	Naphthalene, 1-(2-propenyl)-	168.093	12.13	C13 H12	benzene-derivatives	alkylbenzene	168.093	168.093	98.9	83.7	100	852	944	1398	1452.11	0.037263		96102	124687	131927	134220	4
	CL3																		Internal Standard-Corrected Peak Area
1	Features1410	2-Heptenoic acid, 3-methylphenyl ester	111.117	18.324	C14 H18 O2			218.13		95.1	93.3	97.2	779	811	1717	1068	0.607678			564954	523208		2
2	Features12	6-Methylhomofulvene	106.078	3.103	C8 H10			106.078	106.077	98.2	99.5	99.9	885	910	915	#N/A	#N/A			10629930		7849378	2
3	Features13	Oxabicyclo-(2.2.1)-heptane	98.0729	3.139	C6 H10 O			98.0726	98.0723	98.4	90.1	100	756	920	918	#N/A	#N/A			35363438	26021068	28326721	3
4	Features14	2-Pentene, 4-methyl-	84.0937	3.141	C6 H12			84.0934	84.0931	98.8	92.6	100	856	939	918	584.239	0.571274		2296	395277	189792	202155	4
5	Features17	1-Isopropenyl-2,2,3,3-tetramethylcyclopropane	138.14	3.157	C10 H18			138.14	138.14	98.7	96.5	99	934	956	919	#N/A	#N/A			5260618	2966148	4263117	3
6	Features19	Pentanal, 2,2-dimethyl-	89.06	3.186	C7 H14 O			114.104		97.7	89.2	100	755	886	921	813.793	0.131737		271237	76664021	18144713	44899301	4
7	Features24	Phenacylidene diacetate	105.07	3.254	C12 H12 O5			236.068		91.4	96.1	97.1	948	966	926	1609.3	0.424596			831667	403011		2
8	Features31	(S)-2-Methyl-5-oxotetrahydrofuran-2-carboxylic acid	99.0443	3.409	C6 H8 O4			144.042		99.2	91.6	100	889	958	938	1179.63	0.204834		54435	1948663	445393	1084568	4
9	Features34	6-Ethyl-5,6-dihydro-2H-pyran-2-one	97.0287	3.635	C7 H10 O2			126.068		99.3	100	100	834	962	955	1150.54	0.169955			299267	252249	349610	3
10	Features38	Dimethyl - heptadienone	97.0651	3.745	C9 H14 O			138.104		98.2	99.1	99.7	826	912	963	#N/A	#N/A		262742	54189735	7530024	28692650	4
11	Features43	β-(2'-phenylethyl)-D-glucopyranoside-tetrakis(trifluoroacetyl)	105.034	3.779	C22 H16 F12 O10 Si4			779.962		97.8	98.6	100	781	891	966	#N/A	#N/A			956490	1011225	1377271	3
12	Features58	1,2-Diphenyl-1-propanone	105.07	3.898	C15 H14 O			210.104		97.6	90.2	98.4	763	910	974	1755.91	0.445302			5086122	2071767	5415448	3
13	Features62	x - ethyl - x - methyl - benzene	120.094	3.974	C9 H12			120.093	120.093	97.4	92.8	100	818	868	980	#N/A	#N/A			93337			1
14	Features76	[(t-butyl)dimethylsilyl] acetate	117.037	4.028	C8 H18 O2 Si			174.107		97.7	84.3	96.4	909	958	984	#N/A	#N/A			128625	101278	61480	3
15	Features86	2-Hexene, 3-ethyl-	83.0858	4.134	C8 H16			112.125		95.7	98.4	99.7	778	791	992	793.79	0.2497			15428598		12492009	2
16	Features88	x - ethyl - x - methyl - benzene	120.094	4.206	C9 H12			120.093	120.093	97.1	85.1	100	827	856	997	#N/A	#N/A		4258	1483480	1054021	1257431	4
17	Features92	x - ethyl - x - methyl - benzene	120.094	4.329	C9 H12			120.093	120.093	97.6	98.4	100	824	881	1005	#N/A	#N/A		10699	1639588	1237686	3199917	4
18	Features99	(R)-2-Pentyloxirane	71.0858	4.556	C7 H14 O			114.104		98.7	96.6	98.6	886	961	1018	#N/A	#N/A			1354329	753604	683790	3
19	Features100	Benzoic acid, 4-[(tetrahydro-2H-pyran-2-yl)oxy]-, methyl ester	121.101	4.561	C13 H16 O4			236.104		96.1	88.9	94.8	841	909	1018	1866.79	0.454678			91352	149331	102081	3
20	Features102	2,3-Dimethylbicyclo[2.2.1]hepta-2,5-diene	120.094	4.641	C9 H12			120.093	120.093	99.6	81	100	839	981	1022	#N/A	#N/A			609036	360473	535689	3
21	Features105	Pentane, 3,3-dimethyl-	71.0859	4.666	C7 H16			100.125		99.2	93.4	99	912	979	1024	668.531	0.531717			376588	56793	108595	3
22	Features111	4H-Cyclopenta[b]furan, 5,6-dihydro-	108.057	4.801	C7 H8 O			108.057	108.057	98.9	100	100	906	942	1031	897.447	0.148814		670159	2951954	3412732	3160481	4
23	Features112	6-Methyl-1-cyclohex-3-enecarboxaldehyde	93.0702	4.861	C8 H12 O			124.088		98.5	98.5	100	757	926	1035	#N/A	#N/A			4874533	2715042	3187101	3
24	Features113	(Z)-2-butenedioic acid bis(phenylmethyl) ester	107.049	4.897	C18 H16 O4			296.104		98.3	88.4	100	750	915	1037	#N/A	#N/A		330023	1296765	1807362	1018745	4
25	Features115	2-Methylpyrrolidone	99.0682	4.962	C5 H9 N O			99.0679	99.0676	98.6	100	100	896	929	1041	#N/A	#N/A		5005910	37011406	29868252	17559898	4
26	Features120	Dicinnamyl ether	117.07	4.994	C18 H18 O			250.135		98.3	95	100	852	913	1042	#N/A	#N/A		69170	121751	51734	72836	4
27	Features130	Silane, ethoxy-1,1-D2-trimethyl-	105.07	5.194	C5 H12 D2 O Si			120.093		94.3	90.1	93.8	774	839	1054	#N/A	#N/A			19958663	11609563	14606152	3
28	Features133	(8R,6E)-14-((5S)-2-Oxo-tetrahydrofuran-5-yl)-tetradec-6-en-8-ol	126.14	5.214	C18 H32 O3			296.235		99.6	99.8	100	763	979	1055	#N/A	#N/A		1266281	186598396	64004246	84708626	4
29	Features140	(1S,5S,6S,1'R)-6-Hydroxy-6-(1-phenylethylaminomethyl)bicyclo[3.3.0]octan-2-one	105.07	5.281	C17 H23 N O2			273.172		95.9	98	100	766	792	1059	#N/A	#N/A			2489542	1386984	1745582	3
30	Features143	2,6,10 - trimethyl - tridecane (without stereochemistry)	122.977	5.306	C16 H34			226.266		98.8	99.4	100	759	940	1060	#N/A	#N/A		594809	26522461	23098087	13050368	4
31	Features144	2-(3-Nitro-1H-1,2,4-triazol-1-yl)-1-phenylethanone	105.045	5.385	C10 H8 N4 O3			232.059		99.7	100	100	983	983	1064	2127.81	0.499956		55337	356562	415207	448795	4
32	Features149	10,12-Dibenzoyl-11-(4-nitrophenyl)pyrrolo[2,1-h][1,3,7]triazapyrene	105.045	5.47	C36 H20 N4 O4			572.148		99	99.7	100	940	949	1069	#N/A	#N/A			3705264	3981099		2
33	Features150	10,12-Dibenzoyl-11-(4-nitrophenyl)pyrrolo[2,1-h][1,3,7]triazapyrene	105.045	5.477	C36 H20 N4 O4			572.148		98.7	99.3	100	930	935	1069	#N/A	#N/A			3705264	3981099	3710157	3
34	Features154	Tricyclo[5.2.1.0(2,5)]dec-5(6)-ene	134.109	5.54	C10 H14			134.109	134.109	99	96.8	100	930	951	1073	#N/A	#N/A		10689	417855	323803	384573	4
35	Features156	Cyclopentane, 1,1-dimethyl-	125.133	5.584	C7 H14			98.109		97.1	90.6	99.9	777	857	1076	677.341	0.588566			11354963	6864419	4201751	3
36	Features165	Cyclohexane, 1-ethyl-1-methyl-	97.1014	5.8	C9 H18			126.14		99.6	93.7	100	904	980	1088	899.61	0.209413			134252	363363	127112	3
37	Features176	N-(4-Picolyl)phenylglyoxylamide	269.977	5.964	C14 H12 N2 O2			240.089		97.7	93.1	96.7	867	948	1097	#N/A	#N/A		12551	209108	101210	197030	4
38	Features177	3-(p-Chlorophenyl)-5-(2'-phenylethyl)-pyrazol-4-one - 1,2-dioxide	152.987	5.971	C17 H13 Cl N2 O3			328.061		97.8	86	100	765	888	1097	#N/A	#N/A			12565018	854854	3350562	3
39	Features186	(6Z)-9-oxabicyclo[6.1.0]non-6-ene	96.0936	6.025	C8 H12 O			124.088		97.5	85.5	100	760	873	1100	#N/A	#N/A		132555	4609865	3861916	2355164	4
40	Features192	(2S,3S/R)-2-Methyl-3-vinyl-3,6-dihydro-2H-pyran-3-ol	123.081	6.209	C8 H12 O			124.088		99.8	93.4	100	897	987	1109	#N/A	#N/A		75291	863332	916985	683042	4
41	Features193	1,3-Butadiene, 2-chloro-	88.0077	6.222	C4 H5 Cl			88.0074	88.0072	97.7	84.9	98.2	787	918	1110	588.305	0.886777			9482744	136825	2451935	3
42	Features196	Pentane, 2,3,3-trimethyl-	182.026	6.267	C8 H18			114.14		99.6	81.8	100	760	978	1113	779.298	0.428208		1378	120176			2
43	Features199	cis-chrysanthenyl propionate	134.109	6.314	C13 H20 O2			208.146		98.3	99.7	99.8	782	918	1115	#N/A	#N/A		616862	8268656	7408789	9015232	4
44	Features203	Diisopropyl exo-3-methyl-2-oxabicyclo[3.1.0]hex-3-en6-ylphosphonate	147.021	6.339	C12 H21 O4 P			260.117		96.4	91.5	100	772	821	1116	#N/A	#N/A			269179	1649	141327	3
45	Features213	1,4-Cyclohexadiene, 1,6,6-trimethyl-3-methylene-	134.109	6.449	C10 H14			134.109	134.109	99.6	99.5	99.9	853	980	1122	#N/A	#N/A		1841042	75839134	20838397	22154443	4
46	Features214	1,4-Cyclohexadiene, 1,6,6-trimethyl-3-methylene-	134.109	6.453	C10 H14			134.109	134.109	99.4	99.3	100	854	971	1122	#N/A	#N/A		560885	2574700	6292268	6765081	4
47	Features216	(1R,2S)-1-ethynyl-2-vinylcyclopropane	91.0545	6.465	C7 H8			92.062		97.6	97.9	99.3	862	892	1123	#N/A	#N/A		354475	2674036	2333636	2529213	4
48	Features217	Cyclopentanone, 2-ethenylidene-	108.057	6.467	C7 H8 O			108.057	108.057	98.3	85.6	100	795	912	1123	#N/A	#N/A		828049				1
49	Features253	3,3'-Bicyclopentenyl	134.109	6.745	C10 H14			134.109	134.109	98.4	94	99.3	866	934	1137	1018.02	0.116868			19381	8472	6510	3
50	Features261	2-Methyl-3-(3,7,11-Trimethyldodecenyl)-4,5-dioxacyclohexene	95.0495	6.831	C20 H36 O2			308.271		96.6	91.8	100	773	829	1141	#N/A	#N/A			1537197	210590	745065	3
51	Features266	1-Butan-2-yl-2-methyl-benzene	148.125	6.876	C11 H16			148.125	148.124	95.9	88.1	100	779	793	1144	#N/A	#N/A		292607				1
52	Features269	1-Ethenyl-5-propan-2-ylidene-cyclopenta-1,3-diene	132.094	6.954	C10 H12			132.093	132.093	98.2	98.2	100	814	907	1148	#N/A	#N/A		232314	2407654	2248524	2437727	4
53	Features275	2-(3,3-Dimethylbut-1-ynyl)buta-1,3-diene	134.109	7.004	C10 H14			134.109	134.109	99.8	99.8	100	971	991	1150	#N/A	#N/A		41525	287488	280341	333063	4
54	Features277	1-Phenylhex-5-yn-3-ol	115.054	7.039	C12 H14 O			174.104		94.8	94.4	93.7	797	866	1152	#N/A	#N/A		2193961	21678912	17457215	19074406	4
55	Features279	1,4-Cyclohexadiene, 1,6,6-trimethyl-3-methylene-	134.109	7.062	C10 H14			134.109	134.109	99.6	97	100	941	977	1153	#N/A	#N/A		365774	2617942	2209733	2611010	4
56	Features288	Hexane, 1,1'-[methylenebis(oxy)]bis-	121.092	7.185	C13 H28 O2			216.208		95.9	96	100	758	795	1159	1431.22	0.190203		98845	773223	924314	643032	4
57	Features300	(1S)-2-ethyl-1-phenyl-prop-2-en-1-ol	133.101	7.338	C11 H14 O			162.104		90.6	92.8	100	850	869	1167	#N/A	#N/A		64511	919868	650829	653247	4
58	Features305	1,2-Benzenediol, o-(2-methylbenzoyl)-	119.061	7.446	C14 H12 O3			228.078		91.7	83.1	82.9	860	924	1173	#N/A	#N/A		4220	28189	24562	17686	4
59	Features306	Hexane, 2,2-dimethyl-	119.061	7.455	C8 H18			114.14		98.5	94.4	98.4	881	956	1173	726.899	0.613705		61099	207643	194356	247306	4
60	Features307	1-Butan-2-yl-2-methyl-benzene	148.125	7.482	C11 H16			148.125	148.124	98.4	89.2	97.8	856	962	1175	#N/A	#N/A		1204325	7100062	6207338	5697947	4
61	Features309	Cyclopentanecarboxylic acid, 2-ethenyl-, cis-	115.031	7.498	C8 H12 O2			140.083		97	90.6	98.3	825	883	1175	#N/A	#N/A		24945	160244	68402		3
62	Features318	2,2-Dimethylpropyl 3,3-dimethyl-2-oxidanylidene-butanoate	109.088	7.659	C11 H20 O3			200.141		99.5	89	100	883	975	1184	#N/A	#N/A		82223	545164	25673	48311	4
63	Features330	2-[(2S,3R)-3-methyl-2-phenyl-2-oxiranyl]-2-propanol	133.065	7.754	C12 H16 O2			192.114		98.3	92.9	100	774	915	1188	#N/A	#N/A		208920	728791	742204	773385	4
64	Features351	2(3H)-Benzofuranone, hexahydro-7a-methyl-3-methylene-, cis-(.+-.)-	166.099	8.023	C10 H14 O2			166.099	166.098	99.5	100	100	783	976	1202	#N/A	#N/A		2814283	2478158		4139644	3
65	Features353	2,2-Dimethyl-3-(1'-methyl-1'-propenyl)cyclobutane-1-ethyl formate	82.078	8.077	C13 H22 O2			210.161		98.2	90	100	752	909	1205	#N/A	#N/A		59673	687954	239938	346982	4
66	Features364	Furazan-3-carboxylic acid, 4-amino-, 2-(2,5-dimethylphenyl)-2-oxoethyl ester	133.076	8.351	C13 H13 N3 O4			275.09		96	99.8	99.9	784	798	1218	#N/A	#N/A			53251339	22026237	54231194	3
67	Features366	3,3-Dimethylbutan-2-yl 2-methylbutanoate	99.1171	8.414	C11 H22 O2			186.161		97.7	99.7	100	780	885	1221	#N/A	#N/A			16610368	21509451	10392663	3
68	Features371	(+)Methyl 2-O-Benzyl-3-deoxyαD-arabino-hexafuranoside	175.003	8.56	C14 H20 O5			268.131		97.3	94.9	100	759	864	1228	#N/A	#N/A			135064			1
69	Features372	Methanesulfonamide, c-phenyl-N-[1,2,4]triazol-4-yl-	91.0545	8.562	C9 H10 N4 O2 S			238.052		95.3	90.2	100	804	966	1228	#N/A	#N/A		94659	121727	114806	129219	4
70	Features376	1-(5-Ethyl-3-pyridinyl)ethanone	149.084	8.591	C9 H11 N O			149.084	149.083	99	99.7	100	873	949	1229	#N/A	#N/A		6204654	12690849	11432566	10136933	4
71	Features378	(SR/RS)-7-Methyl-8-oxaspiro[5.2]cyclooctan-1-one	140.083	8.634	C8 H12 O2			140.083	140.083	99.6	97.8	99.8	867	985	1231	#N/A	#N/A			61967220	53557661	39828423	3
72	Features380	1-Propanone, 3-cyclopentyl-1-(2,4-dimethylphenyl)-	133.101	8.679	C16 H22 O			230.167		99.1	85.7	100	802	954	1233	#N/A	#N/A		770098	2355646	2380133	2186204	4
73	Features391	Benzenesulfonic acid, 4-methyl-, [2-(1-methylethylidene)cycloheptylidene]hydrazide	165.164	8.809	C17 H24 N2 O2 S			320.155		96.1	93	100	756	803	1240	#N/A	#N/A			80515		171379	2
74	Features392	Hexane, 3,3-dimethyl-	111.66	8.813	C8 H18			114.14		97.2	99	99.5	854	871	1240	749.784	0.65381		4161688	21553424	17797856	11663692	4
75	Features402	Tetradecane, 2,5-dimethyl-	85.1014	8.939	C16 H34			226.266		97.4	99.9	100	838	870	1246	1514.33	0.177192		3802656	21152386	15625403	10181561	4
76	Features407	4,4-Dimethylhepta-1,6-diene	83.0858	9.042	C9 H16			124.125		99.2	99.1	100	878	957	1251	#N/A	#N/A			940325	1175168	560837	3
77	Features409	Oxetane, 3-(1-methylethyl)-	154.172	9.06	C6 H12 O			100.088		98.9	91.6	100	805	944	1252	758.195	0.651291		448675	2288736	2211814	1417726	4
78	Features410	Heptane, 3,3-dimethyl-	113.133	9.069	C9 H20			128.156		97.4	98.5	98.5	808	896	1252	844.478	0.482573			73226886	68867668	42951893	3
79	Features412	(S)-(+)-2',3'-Dideoxyribonolactone	85.0287	9.092	C5 H8 O3			116.047		98.9	92.6	100	890	943	1253	1136.66	0.102353		587569	1054675	1190324	887101	4
80	Features425	(R)-5-Pentyl-2-pyrrolidinone	126.141	9.256	C9 H17 N O			155.13		97.4	86.9	95.1	763	968	1261	#N/A	#N/A		278539	586404	365468	253850	4
81	Features438	1-Nonene, 3-methyl-, (R)-	111.117	9.306	C10 H20			140.156		96.1	85	95.1	828	902	1263	#N/A	#N/A		718948	1861656	1823106	1799074	4
82	Features443	2,2-Dimethyl-1-cycloheptane-3-buten-1-ol	165.164	9.377	C12 H22 O			182.167		99.2	98.2	100	905	958	1267	#N/A	#N/A				2456707	1224135	2
83	Features447	Naphthalene, 1,2,3,4-tetrahydro-1-pentyl-	131.086	9.415	C15 H22			202.172		95.4	96.1	100	754	769	1269	#N/A	#N/A		1995050	5684802	5953389		3
84	Features451	2-Furanmethanol, tetrahydro-, acetate	135.117	9.465	C7 H12 O3			144.078		97.9	95.7	99.8	855	897	1271	1072.84	0.184711			14768553	23541769		2
85	Features461	(2E,5E)-4-hepta-2,5-dienone	110.073	9.624	C7 H10 O			110.073	110.072	97.8	94.5	100	853	890	1279	#N/A	#N/A			188263	145151	150928	3
86	Features468	(1R)-1-[(2R,3S)-[3-(Hydroxymethyl)oxiranyl]methyl]-3-(methoxycarbonyl)-2(Z)-allyl Benzoate	105.034	9.667	C16 H18 O6			306.11		97.9	97.4	96.7	755	959	1281	#N/A	#N/A		498915	798887	883526	685943	4
87	Features469	2-tert-Butyl-1-cycloprop-2-enecarboxylic acid tert-butyl ester	148.088	9.676	C12 H20 O2			196.146		98.9	99	100	798	945	1281	#N/A	#N/A		20323392	53109702	32122421	31608841	4
88	Features472	Tritetracontane	126.141	9.714	C43 H88			604.688		99.5	99	100	761	976	1283	4534.63	0.717066			86006031	102571706		2
89	Features475	[1R-(1α,3α,4β,5α)]-1,3,4-Trihydroxy-5-[(diisopropoxyphosphinyl)methyl]cyclohexan-1-carboxylic acid	97.1014	9.727	C14 H27 O8 P			354.144		98.6	100	100	862	929	1284	#N/A	#N/A		352342	1902513		1222777	3
90	Features493	2,7-Dimethyl-4-methylene-3,6-octanediol	81.0702	9.889	C11 H22 O2			186.161		99.8	96.4	100	878	989	1291	#N/A	#N/A			1097802	1575418	668958	3
91	Features494	2,3,3,6,6,7-Hexamethyl-1,4,7-octatriene	97.1015	9.896	C14 H24			192.187		99.9	98.4	100	778	993	1292	#N/A	#N/A			1274143	2290035	916829	3
92	Features510	1-Phenyl-2-cyclopropylacetylene	142.078	10.048	C11 H10			142.078	142.077	99.8	92.1	100	901	989	1299	#N/A	#N/A			32515521	16009684	30802233	3
93	Features545	Spiro[4.5]decane	95.0858	10.199	C10 H18			138.14		98.2	96.8	99.8	778	916	1306	1071.74	0.218578		892077	4350540	2269537	2874634	4
94	Features548	Cyclohexanecarboxaldehyde, 1,3-dimethyl-2-pentylidene-, (1α,2E,3β)-	179.179	10.241	C14 H24 O			208.182		99.1	90.2	100	813	954	1308	#N/A	#N/A			322977	326639	320237	3
95	Features554	Cyclopropane, (1-methylethenyl)-	82.078	10.298	C6 H10			82.0777	82.0775	99.2	96.3	100	908	957	1311	601.785	1.17852		1385532	13923285	16252085	5516276	4
96	Features557	2',3,4',5'-Tetramethylbutyrophenone	147.081	10.347	C14 H20 O			204.151		99.3	100	100	889	962	1313	1577.81	0.167833		344442	368869	605411	540331	4
97	Features560	1-Phenyl-2-cyclopropylacetylene	142.078	10.372	C11 H10			142.078	142.077	99.7	95.4	100	916	986	1314	#N/A	#N/A			17364823	9234634	16813771	3
98	Features571	3-Pentanone, 2,4-dimethyl-	114.104	10.504	C7 H14 O			114.104	114.104	99.5	82	100	753	972	1321	770.444	0.714596		7278	239911	254247	125314	4
99	Features592	Hexadecane, 7,9-dimethyl-	126.141	10.713	C18 H38			254.297		99.6	99.6	100	830	980	1331	1684	0.209618			111635246	153219252		2
100	Features594	3,4-Dimethylene-1,3,5-cyclohepatdiene	118.078	10.731	C9 H10			118.078	118.077	98.9	91.2	100	884	945	1332	#N/A	#N/A		77602	282285	431289	184314	4
101	Features599	4,4-Dimethylpentanal	81.0702	10.742	C7 H14 O			114.104		90.1	80.5	94.7	798	950	1332	828.717	0.607304			2917251	1847305	807347	3
102	Features604	3,4-Dihydroxy-5-[(t-butyldimethylsilyl)oxymethyl]-perhydrofuran-2-cytosine	140.156	10.766	C15 H30 N3 O5 Si			360.195		95.9	89.9	100	778	796	1333	#N/A	#N/A			413098	410910	280226	3
103	Features615	2,2-Di(t-Butyl)-9,9-dimethyl-7-benzyl-1,6-dithia-3,4,8-triazaspiro[4.4]nona-3,7-diene	159.117	10.85	C21 H31 N3 S2			389.195		97.4	91.2	100	839	871	1337	#N/A	#N/A			111037	102560	98772	3
104	Features636	Cyclohexane, 1,1'-(1,5-pentanediyl)bis-	83.0858	11.021	C17 H32			236.25		97.8	100	100	847	888	1346	1792.19	0.248962			2085236	3085587		2
105	Features638	Cyclohexane, 1-ethyl-1-methyl-	97.1015	11.033	C9 H18			126.14		99.5	98.1	100	924	974	1346	899.61	0.209413			772489	337945	341517	3
106	Features640	(5Z)-octa-1,5-diene	110.109	11.036	C8 H14			110.109	110.109	97.1	96	100	770	852	1346	#N/A	#N/A		506011	538043	1140469	470840	4
107	Features644	(Z)-Cyclooct-2-enone	124.12	11.045	C8 H12 O			124.088		95.2	96.6	96.4	790	831	1347	1133.77	0.188068				78022		1
108	Features662	8S-Labda-12Z,13-diene	191.179	11.167	C20 H34			274.265		95.1	100	100	754	754	1352	#N/A	#N/A			2341427	2305110	1729612	3
109	Features673	(1R*,4R*,6R*)-4-Benzyloxymethyl-5-isopropylidene-7,7-dimethyl-3-oxabicyclo[4.1.0]-heptane	165.164	11.256	C19 H26 O2			286.193		96.7	100	100	793	832	1357	#N/A	#N/A		163324		310079	233051	3
110	Features682	3a,9-Propano-3aH-cyclopentacyclooctene-5,8-diol, 6-ethenyldecahydro-1-methoxy-4,6,9,10-tetramethyl-, [1R-(1α,3aα,4β,5β,6α,8β,9α,9aα,10R*)]-	147.08	11.362	C21 H36 O3			336.266		95.7	88.9	100	757	782	1362	#N/A	#N/A			244816	107133	102262	3
111	Features686	(4R,5S,6S)-5-(Benzyloxy)-6-[[(tert-butyldimethyldimethylsilyl)oxy]methyl]-4-vinyltetrahydro-2-pyranone	180.187	11.375	C21 H32 O4 Si			376.206		97.8	98	100	777	888	1363	#N/A	#N/A			756653		866249	2
112	Features693	3-Ethylhexanenitrile	110.109	11.396	C8 H15 N			125.12		92.2	90.8	100	786	951	1363	#N/A	#N/A			403209	433342		2
113	Features695	5-Methylhex-4-en-1-yl Acetate	80.0624	11.402	C9 H16 O2			156.114		98.2	95.6	100	755	911	1364	#N/A	#N/A				935755		1
114	Features709	(4S)-4-hydroxy-1-penten-3-one	56.0625	11.555	C5 H8 O2			100.052		96.2	96.7	100	763	810	1371	#N/A	#N/A			1155171	1227933		2
115	Features718	(3-hydroxy-1-methyl-propyl) benzoate	123.044	11.611	C11 H14 O3			194.094		98.3	98.5	98.8	804	937	1374	#N/A	#N/A		3937193	7364760	6445703	8970366	4
116	Features737	(2RS)-2-Adamantylpropanal	178.135	11.82	C13 H20 O			192.151		99.4	96.5	100	797	969	1384	#N/A	#N/A			11670376		11923750	2
117	Features769	3-Methyl-1-phenylpent-2-en-4-yne	156.093	12.076	C12 H12			156.093	156.093	99.4	89.8	100	830	967	1396	#N/A	#N/A			2245941	1676452	2264824	3
118	Features772	Spiro[furan-3(2H),2'(1'H)-pentalen]-2-one, octahydro-4,5-dihydroxy-1',3'a,4',6'a-tetramethyl-	141.127	12.092	C15 H24 O4			268.167		99.2	86	100	801	960	1397	#N/A	#N/A		637852	1461393	1102810	745749	4
119	Features774	Tetracyclo[4.1.0.02,4.03,5]heptane, 7-phenyl-, stereoisomer	168.093	12.13	C13 H12			168.093	168.093	98.9	83.7	100	852	944	1398	#N/A	#N/A		96102	124687	131927	134220	4
120	Features782	5-Methyl-4-hexene-1-yl acetate	94.0416	12.199	C9 H16 O2			156.114		94.7	90.9	92	835	893	1402	#N/A	#N/A		119954	347223	245102	144480	4
121	Features791	2-Hexyne, 4-methyl-	534.97	12.294	C7 H12			96.0934		98.5	90.4	99.7	781	931	1407	701.964	1.00438		42291013			28358663	2
122	Features800	Dodecane, 5-methyl-	126.141	12.318	C13 H28			184.219		99.6	99.3	100	833	978	1408	1259.73	0.117699			374753			1
123	Features803	(Z)-6-Phenylhex-3-en-1-yne	156.093	12.35	C12 H12			156.093	156.093	99.1	97.4	99.2	830	969	1409	#N/A	#N/A		608251	1122742		1111634	3
124	Features805	3H-2-Benzopyran-3-one, 1,4-diethyl-5,6,7,8-tetrahydro-	206.13	12.375	C13 H18 O2			206.13	206.13	95.1	85.1	90.9	805	935	1410	#N/A	#N/A		603526	1016289	831005	730703	4
125	Features818	3H-Cyclopenta[1,3]cyclopropa[1,2]benzene, 3a,3b,4,5-tetrahydro-1,3b-dimethyl-, [3aS-(3aα,3bβ,7aS*)]-	160.125	12.44	C12 H16			160.125	160.124	99	91.6	100	951	951	1414	#N/A	#N/A			634332	619820	594245	3
126	Features819	Naphthalene, 1,2,3,4,4a,5,8,8a-octahydro-1,4a,6,8a-tetramethyl-, (1α,4aα,8aα)-(.+-.)-	192.187	12.446	C14 H24			192.187	192.187	97.4	94.8	94.3	945	980	1414	#N/A	#N/A			3574035	4375839	3203798	3
127	Features832	2(1H)-naphthalenone, octahydro-3-(1-hydroxy-1-methylethyl)-4a,5-dimethyl-, (4aα,5α,8aα)-(+-)-	178.172	12.494	C15 H26 O2			238.193		98.7	90.3	100	783	933	1416	#N/A	#N/A		359738	821602	431304		3
128	Features850	(Z)-6-Phenylhex-3-en-1-yne	156.093	12.678	C12 H12			156.093	156.093	98	97.2	99.1	774	918	1425	#N/A	#N/A			2839687		2388265	2
129	Features855	2,2-Dimethoxy-3-oxohexanoic acid ethyl ester	147.055	12.736	C10 H18 O5			218.115		97.3	89.9	95.7	890	948	1428	#N/A	#N/A		327428		487562	387822	3
130	Features866	Oxiranemethanol, 2-methyl-3-(phenylmethyl)-, (2R-cis)-	147.08	12.819	C11 H14 O2			178.099		99.6	96.5	100	790	978	1432	#N/A	#N/A			377922	152613	208029	3
131	Features871	Cyclopropa[d]naphthalene, ethanone deriv.	206.166	12.837	C14 H22 O			206.167	206.166	98.4	98.5	100	879	917	1433	#N/A	#N/A			6787992	6042018		2
132	Features880	Phenyl octanoate	135.081	12.914	C15 H22 O2			234.161		100	99.7	100	755	999	1437	1695.75	0.152586			2114699		2820101	2
133	Features882	2-(benzoyloxy)heptanoic acid	128.062	12.925	C14 H18 O4			250.12		97.7	100	100	781	885	1438	#N/A	#N/A			875225		913195	2
134	Features888	4-(2-Methyl-2-oxanyl)phenol	192.114	12.945	C12 H16 O2			192.114	192.114	99.5	99.6	100	775	972	1438	#N/A	#N/A			18215707	10396609	14532603	3
135	Features920	1,2-Dihydro-2,3,6-trimethyl-5-phenyl-1,2,4-triazepine	201.127	13.239	C12 H15 N3			201.126	201.127	99.7	100	100	779	982	1453	#N/A	#N/A		182105	1059752	393991	772597	4
136	Features927	(2S)-N-[3'-(2"-Methyl-1".2"-dicarba-closo-dodecaborane(12)-1"-yl)propionyl]borane-10,2-sultam	177.164	13.3	C16 H33 B10 N O3 S			429.311		96.2	97.1	100	756	809	1456	#N/A	#N/A		795926	1004623	71881	680780	4
137	Features929	2,6,10 - trimethyl - tridecane (without stereochemistry)	127.148	13.306	C16 H34			226.266		98.7	99.8	100	767	932	1456	#N/A	#N/A			95865062	89387679		2
138	Features942	Dodecane, 2,5-dimethyl-	97.1014	13.392	C14 H30			198.234		98.8	99.2	99.7	792	944	1460	1319.82	0.10621		41208274	75282154	84055005	54260646	4
139	Features945	C5 - octalin	206.203	13.482	C15 H26			206.203	206.202	95.3	97.8	97.8	792	811	1465	#N/A	#N/A				194828	177045	2
140	Features975	anti-8,8-Dimethyl-7,9-dioxatetracyclo[4.3.0.0(2,4).0(3,5)]nonan-3-ylmethanol	167.07	13.731	C10 H14 O3			182.094		99.1	90	99.1	759	972	1477	#N/A	#N/A		1868480	2340561	1810133	2167923	4
141	Features992	Methyl (E)-3-[(9H-Fluoren-9-yl)oxy]acrylate	165.07	13.916	C17 H14 O3			266.094		98.7	92.5	100	760	934	1486	#N/A	#N/A				614541		1
142	Features1007	Cyclopentane, 1,1-dimethyl-	98.1093	14.096	C7 H14			98.109	98.1088	98.7	95.2	100	792	932	1495	677.341	0.588566			18116136	17237290		2
143	Features1012	1,2,3-Trimethoxy-1-[(trimethylsilyl)oxy]buta-1,3-diene	159.12	14.14	C10 H20 O4 Si			232.113		98.9	100	100	858	943	1497	#N/A	#N/A			1012192			1
144	Features1038	3,3'-dithiobis(1,4-dimethylpiperazine-2,5-dione)	173.096	14.312	C12 H18 N4 O4 S2			346.076		98.3	100	100	914	914	1505	#N/A	#N/A		1495377	2473081	1140368	1292714	4
145	Features1052	1-Phenoxy-2-chloropropane	169.065	14.456	C9 H11 Cl O			170.049		94.7	84.3	91.9	785	895	1513	1258.29	0.202428					454846	1
146	Features1055	1,2-Di(4-tert-butylphenyl)ethane-1,2-dione	161.096	14.512	C22 H26 O2			322.193		97.6	86.3	100	877	877	1516	#N/A	#N/A		378125	410607	377454	514820	4
147	Features1058	Benzyl hexyl sulfide	91.0546	14.594	C13 H20 S			208.128		91.1	96.6	100	788	892	1520	#N/A	#N/A			458849	441268	444237	3
148	Features1075	(Cyclohexa-1,4-dien-3-yl)phosphonic Acid Bis(N,N-diethylamide)	191.143	14.726	C14 H27 N2 O P			270.186		98.1	96.3	100	782	902	1527	#N/A	#N/A			2236948		2068715	2
149	Features1080	7,8-Dioxabicyclo[4.2.2]deca-3,9-diene, 2-(1-methylethyl)-	180.115	14.782	C11 H16 O2			180.114	180.114	99.5	81.6	100	834	973	1530	#N/A	#N/A					2636010	1
150	Features1091	10-(Benzyloxy)-6-oxodec-7-yn-1-ol	265.02	14.885	C17 H22 O3			274.156		99.1	95.7	100	814	955	1535	#N/A	#N/A		192687	191832	114352	150634	4
151	Features1095	1-(2,2-Dimethylpropyl)adamantane	206.203	14.912	C15 H26			206.203	206.202	96.4	94.6	92.5	767	967	1537	#N/A	#N/A		77022		83836	97923	3
152	Features1100	4-tert-Butyl-2-(prop-1-enyl)-1-(prop-1-enyloxy)benzene	230.166	14.932	C16 H22 O			230.167	230.166	98.6	97.4	100	872	930	1538	#N/A	#N/A			3128341			1
153	Features1143	(R,R)-3,8-Dimethyldecane	155.18	15.313	C12 H26			170.203		98.9	99.5	100	791	943	1557	#N/A	#N/A			88599086	119711717	72375667	3
154	Features1145	2,5-Dimethyl-1-(m-tolyl)-1H-pyrrole	185.12	15.33	C13 H15 N			185.12	185.119	96.6	94.9	100	799	829	1558	#N/A	#N/A			1768012			1
155	Features1161	2-[2-(Benzoyloxy)ethoxy]ethyl benzoate	149.06	15.417	C18 H18 O5			314.115		98.8	97.7	98.3	801	975	1562	2516.02	0.379179				1575040		1
156	Features1162	4,4-Dimethylhepta-1,6-diene	97.097	15.444	C9 H16			124.125		98.8	83.1	100	801	939	1564	#N/A	#N/A				1048351		1
157	Features1163	1-(Hept-1-ynyl)-2-(2-methylallyl)benzene	169.101	15.46	C17 H22			226.172		92.2	89.2	87.9	757	849	1565	#N/A	#N/A					2667188	1
158	Features1175	(S)-(+)-2',3'-Dideoxyribonolactone	85.0287	15.543	C5 H8 O3			116.047		99.5	85.9	100	804	972	1569	1136.66	0.102353			159019	140226		2
159	Features1244	(Z)-3-(1',2',2'-trimethylpropylidene)cyclohexene	164.156	16.228	C12 H20			164.156	164.155	96.6	98.2	100	757	830	1604	#N/A	#N/A			282583	233811	361018	3
160	Features1259	(4R,5R,8S)-4,5 -Epoxy-caryophyllan-8-ol	177.164	16.401	C15 H26 O2			238.193		99.5	91.3	100	757	975	1613	#N/A	#N/A		418999	580157	545986	460129	4
161	Features1282	Deoxycordiachromene	228.01	16.587	C16 H20 O			228.151		96.5	85.5	91.8	760	990	1623	#N/A	#N/A			1502872	633594	1289106	3
162	Features1323	Cyclobutaneacetic acid, 3-acetyl-2,2-dimethyl-, methyl ester, (1S-cis)-	96.0937	16.991	C11 H18 O3			198.125		92.4	87.9	100	846	960	1645	#N/A	#N/A		74521	61389	92131	73599	4
163	Features1325	4-Amino-6-(1-ethyl-1-tetrahydropyranyloxypropyl)-2-methylpyrimidine	194.109	17.09	C15 H25 N3 O2			279.194		94.2	95.1	95.3	804	804	1650	#N/A	#N/A			1266695			1
164	Features1355	Hexane, 3,3-dimethyl-	193.086	17.393	C8 H18			114.14		97.8	90.9	100	755	890	1666	749.784	0.65381			32840600	29956672		2
165	Features1396	retro - alpha - ionone (Isomer I) (so Wiley6)	149.096	18.161	C13 H20 O			192.151		99.7	96.5	100	798	985	1708	#N/A	#N/A			299334			1
166	Features1420	1,9,10,10a-Tetrahydro-10a-methylphenanthrene	196.125	18.619	C15 H16			196.125	196.124	97	88.1	100	791	851	1734	#N/A	#N/A		931370	1250291	659653	1267460	4
167	Features1435	N-Benzylidene-benzylamine	194.096	18.819	C14 H13 N			195.104		98.4	96.7	100	833	919	1745	#N/A	#N/A			21231931		20363516	2
168	Features1457	1-spiro-[Cyclopropane]-2,4-cyclopentadiene	132.089	19.005	C7 H8			92.062		98.2	84.2	99.2	755	924	1756	#N/A	#N/A				3504028		1
169	Features1464	1-Methylcyclohexyl 1-methyl-2-propenyl ketone	97.1015	19.037	C12 H20 O			180.151		90.3	90.5	99.3	801	870	1757	#N/A	#N/A		2099994	3819015	3755203	1030055	4
170	Features1466	2(1H)-Pyrimidinone, 5-chloro-4-(4-chlorophenyl)-1-[[(4-chlorophenyl)thio]methyl]-3,4-dihydro-	255.034	19.12	C17 H13 Cl3 N2 O S			397.981		99.5	90.1	100	822	974	1762	#N/A	#N/A			609098	258008	655599	3
171	Features1476	1H-inden-2-ylmethanol	146.073	19.362	C10 H10 O			146.073	146.072	98.6	98.1	100	789	929	1775	1381.35	0.284977				235174	3816448	2
172	Features1483	Methyl 2-[(octyloxy)methyl]-3-oxocyclobutanecarboxylate	111.66	19.478	C15 H26 O4			270.183		92.5	81	100	779	965	1782	#N/A	#N/A			4546175	7527270		2
173	Features1489	4-Methoxy-1,6-dimethyl-3-phenyl-2(1H)-pyridinone	229.11	19.585	C14 H15 N O2			229.11	229.109	98.8	91.2	100	802	940	1788	#N/A	#N/A					91839	1
174	Features1491	N-{[1'-(Dibenzylamino)methyl]butyl}acetamide	210.14	19.605	C21 H28 N2 O			324.22		93.2	97.6	100	808	910	1789	#N/A	#N/A		2091162			2368250	2
175	Features1502	Hexane, 3,3-dimethyl-	125.133	19.727	C8 H18			114.14		96.9	97.9	99.8	826	846	1796	749.784	0.65381				3121223		1
176	Features1528	4-Octenoic acid, 6-ethyl-3-hydroxy-3,7-dimethyl-, methyl ester	111.081	20.267	C13 H24 O3			228.172		99.5	80.4	100	831	973	1827	1461.85	0.249784				238060		1
177	Features1532	6-(Pentamethylphenyl)fulvene	224.156	20.296	C17 H20			224.156	224.155	99.5	94.6	100	824	976	1829	#N/A	#N/A				28003712		1
178	Features1544	(R,R)-3,8-Dimethyldecane	141.164	20.42	C12 H26			170.203		98.8	99.8	100	792	937	1836	#N/A	#N/A		26940111	54715031	38384212	36887234	4
179	Features1545	3-Methyl-2-butenoic acid, cyclobutyl ester	231.119	20.436	C9 H14 O2			154.099		98.4	90.6	100	761	921	1837	#N/A	#N/A			1216345	395459		2
180	Features1561	(E/Z)-tert-Butyl-(2-diethylaminoethyl)-{5-[5-fluoro-2-methyl-2-oxido-3H-2lambda4-benzo[c]isothiazol-3-ylidenemethyl]-2,4-dimethyl-1H-pyrrole-3-carbonyl}carbamate	86.0603	20.714	C27 H37 F N4 O4 S			532.251		98.8	97.8	100	835	940	1854	#N/A	#N/A				2992603		1
181	Features1576	1,4-Bis(4-methoxyphenoxy)-1,4-dichloro-2,3-diazabuta-1,3-diene	245.049	20.948	C16 H14 Cl2 N2 O4			368.033		97.5	91	100	775	874	1868	#N/A	#N/A			1437844	311656	659909	3
182	Features1598	(R,R)-3,8-Dimethyldecane	140.156	21.54	C12 H26			170.203		99	98.7	100	794	948	1902	#N/A	#N/A			425219	280865		2
183	Features1610	1,2:4,6-Di-O-isopropylidene-α,L-sorbofuranose	260.177	21.9	C17 H24 O2			260.177	260.176	99	88	100	871	948	1925	#N/A	#N/A		1300806	1275375	774710	847224	4
184	Features1654	Tridecane, 7-propyl-	141.164	22.566	C16 H34			226.266		99.4	99.7	100	762	970	1966	1515.41	0.29734					180402594	1
185	Features1677	1,4-Naphthalenedione, 4a,5,8,8a-tetrahydro-2-methoxy-4a,8-dimethyl-, (4aα,8β,8aβ)-	220.109	23.15	C13 H16 O3			220.109	220.109	98.4	97.7	99.9	861	920	2002	#N/A	#N/A		246211515	262616278	195049091	265172865	4
186	Features1688	2-Pentene, 4-methyl-	84.0937	23.34	C6 H12			84.0934	84.0932	99.4	86.3	100	803	971	2014	584.239	0.571274			626043	799049	704149	3
187	Features1690	Phthalic acid, octyl 2-tert-butyl-6-methylphenyl ester	149.133	23.458	C27 H36 O4			424.261		97.7	100	100	780	882	2022	#N/A	#N/A			1970331			1
188	Features1706	l-Proline, N-methoxycarbonyl-, octyl ester	128.107	24.322	C15 H27 N O4			285.193		99.1	100	100	933	955	2078	#N/A	#N/A			3876528			1
189	Features1727	Hexadecane, 7,9-dimethyl-	85.1014	24.821	C18 H38			254.297		97.1	100	100	808	853	2110	1684	0.209618		33635453	67650498		40864999	3
190	Features1736	Hexane, 2,3,4-trimethyl-	198.14	25.257	C9 H20			128.156		99.8	93.9	100	816	988	2140	854.197	1.50528		3775513	4561878		3375025	3
191	Features1741	Pentyl 4-oxohexanoate	112.089	25.418	C11 H20 O3			200.141		98.3	100	100	806	916	2150	#N/A	#N/A			1777155			1
192	Features1810	1-Phenyl-N-(1-phenylethyl)ethanamine	210.128	27.237	C16 H19 N			225.151		98.6	90.6	98	924	969	2276	1698.54	0.339973			1721442	1629464	1269985	3
193	Features1845	Ethyl (2E,4E,6E)-10-(4-Hydroxy-7-methoxy-2,3-benzofuran-6-yl)-2,4,6-decatrienoate	177.164	28.461	C21 H24 O5			356.162		96.5	96.7	100	809	822	2365	#N/A	#N/A		888354	3040973	1895681	1756462	4
194	Features1876	3-Methyl-4-(non-8-enyl)furan-2,5-dione	361.273	28.911	C14 H20 O3			236.141		98.9	84.8	100	779	942	2398	#N/A	#N/A					3779861	1
195	Features1913	2,3-Dihydro-2-methoxy-2,5,6-trimethylbenzofuran-4,7-dione	222.088	29.911	C12 H14 O4			222.089	222.088	97.5	95.4	97.8	834	920	2474	#N/A	#N/A		709341	1155503		763455	3
196	Features1933	Pentane, 2,4-dimethyl-	85.1014	30.338	C7 H16			100.125		98.9	93.1	98.2	897	977	2506	645.167	2.88427				6838541	8158443	2
197	Features1954	Benzenesulfonic acid, 4-methyl-, [2-(1-methylethylidene)cycloheptylidene]hydrazide	165.127	30.475	C17 H24 N2 O2 S			320.155		99.1	87.8	100	791	956	2517	#N/A	#N/A		115927382	130043349	89470770	87995541	4
198	Features2074	(4aR,5S,6R,8aR)-1,5,6,8a-tetramethyl-5-(2-triisopropylsilyloxyethyl)decalin-1-ol	219.174	32.125	C25 H50 O2 Si			410.357		92.7	94.1	100	811	886	2649	#N/A	#N/A		342383	1529723		618430	3
199	Features2091	Nonane, 3,7-dimethyl-	85.1015	32.303	C11 H24			156.187		95.8	97.6	97.6	831	836	2663	1047.28	1.54278					52542970	1
200	Features2095	(-)-3-Butyl-4-methylbicylo[4.3.0]non-1(9)-en-2-one	206.166	32.406	C14 H22 O			206.167	206.166	99.6	96.5	100	933	977	2672	#N/A	#N/A				9610196		1
201	Features2135	Hexane, 2,3,4-trimethyl-	99.1171	32.804	C9 H20			128.156		100	98.1	100	769	999	2705	854.197	1.50528					270918392	1
202	Features2158	Heptadecane, 2,6,10,15-tetramethyl-	253.289	33.493	C21 H44			296.344		98.1	100	100	816	904	2763	1913.53	0.443927		949533	1032887	1529663	1805335	4
203	Features2167	5H-1,3-Dioxolo[4,5-b]pyran, 3a,7a-dihydro-5-methoxy-2-phenyl-	149.023	34.018	C13 H14 O4			234.089		99.6	83.8	100	844	980	2808	#N/A	#N/A		578913	388841	193229	446551	4
204	Features2169	1,2-Benzenedicarboxylic acid, bis(2-ethylbutyl) ester	177.127	34.106	C20 H30 O4			334.214		99.2	96.1	99	851	978	2815	2240.67	0.256322		1212853	17307570	1734597		3
205	Features2192	Terephthalic acid, isohexyl 2-methylphenyl ester	233.153	34.427	C21 H24 O4			340.167		97.7	92.2	100	837	884	2844	#N/A	#N/A		1075153	1807879	1676561		3
206	Features2197	Phenyl octanoate	275.273	34.593	C15 H22 O2			234.161		93.2	80.5	100	757	999	2858	1695.75	0.152586				504417	633136	2
207	Features2245	Tetramethyl - cyclohexane	123.117	35.882	C10 H18			138.14		97.8	88.9	100	771	887	2974	#N/A	#N/A			332324	343141	348841	3
208	Features2354	Phenanthrene, 2-dodecyltetradecahydro-	191.179	37.564	C26 H48			360.375		98.6	99.4	100	784	927	3130	2761.75	0.133338					44868547	1
209	Features2357	1,4-Hexadiene, 3-ethyl-	92.0624	37.638	C8 H14			110.109		99.4	98.8	100	842	968	3137	802.505	2.90901			543400		1142961	2
210	Features2359	Bis(2-methylpropyl) 4,5-dimethylbenzene-1,2-dicarboxylate	177.164	37.645	C18 H26 O4			306.183		97.7	86.9	100	760	883	3138	#N/A	#N/A			633813	1383262	720417	3
211	Features2367	Gamma-lupane	369.351	38.159	C30 H52			412.406		98.4	100	100	828	919	3187	#N/A	#N/A					3199579	1
212	Features2410	2β-Methyl-17β-hopane	205.195	38.902	C31 H54			426.422		96.7	98.8	100	797	833	3261	#N/A	#N/A					25632590	1
213	Features2412	1H-Indene-5-carboxylic acid, 2,3,3a,4-tetrahydro-3a-methyl-, methyl ester, (.+-.)-	192.114	39.36	C12 H16 O2			192.114	192.114	99	94.4	100	874	951	3306	#N/A	#N/A			3972376	2837213	4234611	3
214	Features2416	Tigogenin 3-O-α-L-rhamnopyranosyl-(1-4)-β-D-glucopyranoside peracetate	399.362	39.477	C51 H76 O18			976.503		97.9	82.2	100	896	896	3318	#N/A	#N/A			2848131		2811677	2
215	Features2433	7,7-Dimethyl-1-vinylbicyclo[2.2.1]heptane	203.179	39.587	C11 H18			150.14		99.9	90.6	100	840	993	3329	#N/A	#N/A		561438	1079673	509819	1687959	4
216	Features2478	Terephthalic acid, octyl 2-phenoxyethyl ester	305.138	40.604	C24 H30 O5			398.209		95.6	94	99.2	763	796	3433	#N/A	#N/A			22008296	3745882		2
217	Features2528	2-[[(2E)-1-[2-(2,2-dimethoxyethyl)-1,3-dithian-2-yl]-2-(2-ketotetrahydrofuran-3-ylidene)ethoxy]methyl]acrylic acid methyl ester	205.053	42.276	C19 H28 O7 S2			432.127		96	86.4	93.5	773	929	3604	#N/A	#N/A					4766033	1
218	Features2553	(4aR,8aR)-Ethyl 4a-fluoro-7-oxo-3,4,4a,7,8,8a-hexahydro-2H-quinoline-1-carboxylate	221.084	43.026	C12 H16 F N O3			241.111		92.4	80.1	88.5	782	851	3673	#N/A	#N/A		4511529				1
219	Features2605	(5S,9S)-5,9-dimethylpentadecane	112.125	44.936	C17 H36			240.281		97.2	99.4	100	817	861	3825	#N/A	#N/A		11145104	21688329	20056232	6684615	4
220	Features2609	Di-t-butyl 6-(cyclohexylamino)-1,4-dihydro-3-methyl-1-phenylpyrano[2,3-c]pyrazole-4,5-dicarboxylate	408.156	45.129	C29 H39 N3 O5			509.288		95.8	94.2	100	757	788	3839	#N/A	#N/A			181637	216959	145479	3
221	Features2620	N-[3-(2-Thienylcarbonyl)-2-hydroxy-5-methyl-4-(methoxycarbonyl)-2-(trifluoromethyl)-2,3-dihydro-1H-pyrrolyl]methylcarbamate	297.099	45.717	C15 H15 F3 N2 O6 S			408.06		96.4	100	100	821	821	3880	#N/A	#N/A		3176941				1
222	Features2655	6-Acetoxy-2-methyl-2-(4-methylpen-3-enyl)-2H-chromene	161.096	49.069	C18 H22 O3			286.156		98.7	88.7	100	775	935		#N/A	#VALUE!		10204	2469256	2790819		3
223	Features2658	2'-Deoxy-3'-O-benzoylribosethymine	191.037	49.718	C17 H18 N2 O6			346.116		100	82.7	100	773	999		#N/A	#VALUE!		39638	39495	150289	159808	4
	CL4
1	Features1			3.02				401.211												767923	175594	262963	3
2	Features2			3.02				344.148											86861	6033027	310394	683612	4
3	Features3			3.02				285.115												2014762	743341	1157313	3
4	Features4			3.02				267.092												2014762	743341	1157313	3
5	Features5			3.025				322.168													188820		1
6	Features6			3.027				344.15												1494704		1547199	2
7	Features7			3.027				240.208													1235488		1
8	Features8			3.027				228.208												17762632	8736008	11675409	3
9	Features9			3.074				104.062	104.062											1100835	1075631	1786508	3
10	Features10			3.076				159.924												1189910	85328	615851	3
11	Features11			3.09				106.078												10629930	3226460	7849378	3
12	Features15			3.144				264.136											20547	259456	173598	209458	4
13	Features16			3.15				189.962												1818013	420159	1045683	3
14	Features18			3.182				270.292												10252354		7070097	2
15	Features20			3.191				496.092												149445	49784	197852	3
16	Features21			3.195				248.162												243359	66329	257198	3
17	Features22			3.224				159.924												111604			1
18	Features23			3.236				197.105												587918	336579	425347	3
19	Features25			3.258				248.089											12791	298520		422794	3
20	Features26			3.281				94.0083	94.0081										35182	110449	198458		3
21	Features28			3.319				117.914											338894634	25638654649	4324648198	14072955269	4
22	Features29			3.326				216.136											98017	10478012	1308925	3447788	4
23	Features30			3.33				125.988												81769307	13702490	48185671	3
24	Features32			3.433				282.146											81486	740899	1127874	918033	4
25	Features33			3.55				161.084													3575048	6448458	2
26	Features35			3.703				252.208														5629535	1
27	Features36			3.725				194.13												468808	706017	559902	3
28	Features37			3.743				286.189											10955	1438283	194715	876897	4
29	Features39			3.754				112.052												415026	66427	253644	3
30	Features40			3.754				258.147												1590537	252860	1365625	3
31	Features41			3.757				211.168												854280	175814	661570	3
32	Features42			3.77				149.095												1060307	396788	973706	3
33	Features44			3.826				103.018												14489	8141		2
34	Features45			3.835				96.057	96.0567										457778	5417217	3041888	5950583	4
35	Features46			3.838				86.0726	86.0724										85245	1261292	817092	1379314	4
36	Features47			3.851				220.109												590216		347792	2
37	Features48			3.853				271.12												565195	258061	265816	3
38	Features49			3.855				262.142											1733	82999	63960	50771	4
39	Features50			3.858				312.132											3865749				1
40	Features51			3.862				368.132											821268	2853234	2794657	2612307	4
41	Features52			3.864				356.148												109342	102638	96406	3
42	Features53			3.865				374.079											53575	26985	43603	116111	4
43	Features54			3.867				150.104												146780	104946		2
44	Features55			3.869				400.153											152849	113923	155785	133476	4
45	Features56			3.873				318.157											414543				1
46	Features57			3.882				190.138												146780	104946	113663	3
47	Features59			3.914				164.05											3865749	2660897	1322695	4052289	4
48	Features60			3.941				96.057	96.0567										829261	6246318	4728387	6563666	4
49	Features61			3.972				211.136											30824	629311	1143368	1177413	4
50	Features63			3.975				314.095											30824	629311	1143368	1177413	4
51	Features64			3.977				540.126												143478	115461	54403	3
52	Features65			3.979				296.075												16363930	11471774	11886808	3
53	Features66			3.981				267.053												16363930	11471774	11886808	3
54	Features67			3.983				351.168												163175	100066	137136	3
55	Features68			3.986				338.145												170164	177344	228809	3
56	Features69			3.99				149.12												432769	389400	779182	3
57	Features70			3.992				325.866												192192	109605	170097	3
58	Features71			3.995				194.13												276424	134071	132511	3
59	Features73			4.01				393.128												86878	115429	106522	3
60	Features74			4.013				284.087												412584	220462	385777	3
61	Features75			4.024				234.161												1801224	1207668	1138422	3
62	Features77			4.031				156.114														1699257	1
63	Features78			4.046				149.12												99551	57916	67580	3
64	Features79			4.073				296.075														1556619	1
65	Features82			4.109				100.052												10541061			1
66	Features83			4.114				124.052												4593901	558528	1997460	3
67	Features84			4.118				100.088											2503	443655	25860	156161	4
68	Features85			4.125				206.203												14934367	7737145		2
69	Features87			4.201				236.177												1297471	1476335	3519413	3
70	Features89			4.212				112.088												6176668	3579528	3642286	3
71	Features90			4.302				160.146												80127	83906	67555	3
72	Features91			4.305				98.0726	98.0724												103035913	91050139	2
73	Features93			4.331				136.125												617374	376660	376386	3
74	Features94			4.394				174.161											4557	37176	50780	71587	4
75	Features95			4.403				114.068	114.067											1237956	162141	512152	3
76	Features96			4.417				278.151												9820180		9798260	2
77	Features97			4.43				130.099												156749	37921	98204	3
78	Features98			4.534				377.901												3669402	3037878	3601524	3
79	Features101			4.59				150.104											107118	2576756	480107	845498	4
80	Features103			4.648				377.901												14727800	11768620	13099074	3
81	Features104			4.653				270.292												1194974	872210	878588	3
82	Features107			4.747				305.083												19451136	12882963	16660493	3
83	Features108			4.756				144.114											9861143	201833306	172937284	118166327	4
84	Features109			4.763				112.125											9163499	163367519	136528448	96087054	4
85	Features110			4.783				148.125												5531638	3323247	3031383	3
86	Features114			4.949				299.107												2175909	1492139	1706413	3
87	Features116			4.969				198.057											1612	647077	92227	269885	4
88	Features117			4.974				126.068												1688517	271719	937503	3
89	Features118			4.978				188.141											81862	7806093			2
90	Features119			4.987				254.083											131702	2881564	557090	857594	4
91	Features121			4.994				226.193												828657	502035	329412	3
92	Features122			5.005				226.266											81862	7806093	1282022	3145621	4
93	Features123			5.041				201.971												6142973	771308	3012697	3
94	Features124			5.052				106.018	106.018											170497	94992	113752	3
95	Features125			5.099				349.207												2424418	955968	929302	3
96	Features126			5.108				170.026											2878	489544	448019		3
97	Features128			5.12				214.12												734922	348244	655481	3
98	Features129			5.142				238.095											114047	921722	501117	678006	4
99	Features131			5.198				154.054											5993	1271124	884093	1038554	4
100	Features132			5.207				302.209												932456	233067	340835	3
101	Features134			5.239				287.993											5500	4625967	285335	2907412	4
102	Features135			5.239				126											5500		285335	2907412	3
103	Features136			5.257				164.083											1824	501505	157598	278675	4
104	Features137			5.268				123.984												4386524	299701	1165754	3
105	Features138			5.275				269.177												1935519	92761	504480	3
106	Features141			5.293				190.135											5373	2897454	1593447	2017710	4
107	Features142			5.304				222.104											1989	1394495	84385	700963	4
108	Features145			5.427				181.146												144834	116436	57238	3
109	Features146			5.445				107.073	107.073										1245445	2146741	3229395	1530913	4
110	Features147			5.455				107.073	107.073										124563				1
111	Features148			5.465				190.099											53944			488678	2
112	Features151			5.492				165.115											79370	89322	81976	107512	4
113	Features153			5.533				120.057	120.057										230906	1811626	1765923	2054912	4
114	Features155			5.58				154.099												1821000	1611189	1397404	3
115	Features157			5.661				112.125	112.124											22466191	12877474	7923027	3
116	Features158			5.697				168.114											64074	2521210	1763881	2008358	4
117	Features159			5.706				235.133												576110			1
118	Features160			5.708				400.109												2462773	1434733		2
119	Features161			5.715				276.136												293208	145382	247494	3
120	Features162			5.755				361.995												1820016	405577		2
121	Features163			5.778				194.13											371311	2363396	1251106	2315067	4
122	Features164			5.789				269.177											8999000	39960953	35077323	36914063	4
123	Features166			5.856				446.13											10697874				1
124	Features167			5.865				165.115												806040	312468		2
125	Features168			5.888				185.105											408116	1521730	983027	1298562	4
126	Features169			5.897				183.089												3096177	176329		2
127	Features170			5.901				182.026	182.025										166881	8316097		3796917	3
128	Features171			5.919				124.125												1910089	13382	378305	3
129	Features172			5.921				181.11												1910089	13382	378305	3
130	Features173			5.923				244.24											845	1084272		257078	3
131	Features174			5.924				443.273											4705	209553	213942	99140	4
132	Features175			5.935				392.093											4423001	95475185	83346479	81373830	4
133	Features178			5.971				240.089														184508	1
134	Features179			5.991				388.064											284468	351423	771045	500375	4
135	Features180			6				804.176												1451198	1209406	1254876	3
136	Features181			6.007				236.104												29562807	24623630	23053386	3
137	Features182			6.009				214.081												3051758	2187452	2192139	3
138	Features183			6.016				210.234												36429991	31603992	18026812	3
139	Features184			6.018				158.13												33400824	28291428	16255335	3
140	Features185			6.022				142.172												36429991	31603992	18026812	3
141	Features187			6.03				110.109												12320165	3681049	6464271	3
142	Features188			6.096				176.083												2012718		1360451	2
143	Features191			6.168				250.042														1003599	1
144	Features194			6.247				114.068											70037	102773	82087	75599	4
145	Features195			6.256				314.068											1689	685063	61486	308824	4
146	Features197			6.301				144.114												10794078	485305	4047541	3
147	Features198			6.31				300.157											313189	2351228	133618	1152700	4
148	Features200			6.323				109.052	109.052												159897		1
149	Features201			6.337				152.156	152.156											1149618	1235316	597198	3
150	Features202			6.337				195.089											92167	186714	278673	108057	4
151	Features204			6.343				289.144											14361516	43764787	29503124	24465293	4
152	Features205			6.355				270.077											39279	30185	51088	184091	4
153	Features206			6.386				109.052	109.052										911220		2269766	1003283	3
154	Features207			6.386				109.052											911220	1721912	2269766	1003283	4
155	Features208			6.42				212.177											61851		7902225	3538734	3
156	Features209			6.435				159.984	159.984											3686658	3258917	10624735	3
157	Features211			6.442				345.085												79942	244961	210184	3
158	Features212			6.442				222.125											12262	31964		25233	3
159	Features215			6.455				175.063												104499	45148	78453	3
160	Features218			6.467				80.062	80.0618											1267820	1185330	891649	3
161	Features219			6.485				164.12											74164	297513	354228	230477	4
162	Features220			6.485				166.099											74164	297513	354228	230477	4
163	Features222			6.503				248.056											116282	3296542	3047524	2477355	4
164	Features223			6.554				182.026											28485	374761	23665	166265	4
165	Features224			6.563				480.236												419569	416268	457393	3
166	Features225			6.563				528.112												103151	114957	135715	3
167	Features226			6.566				420.229												219559	256478	263456	3
168	Features227			6.57				181.073												80875	89197	88531	3
169	Features228			6.57				342.123											62418	169270	204267	225401	4
170	Features229			6.572				334.095											549333	2175724	2286129	2409381	4
171	Features230			6.572				300.127												3456013	3582392	4434645	3
172	Features231			6.572				280.124												31139	29699	33568	3
173	Features232			6.575				311.173											429826	890521	948491	1141193	4
174	Features233			6.599				251.047											122256	90090	357433	226202	4
175	Features234			6.611				227.115											26157	2870735	248384	1561528	4
176	Features235			6.615				134.049												310430604		141726828	2
177	Features236			6.615				134.049												7933951	66609010	4000920	3
178	Features237			6.617				252.136												2757480		1898990	2
179	Features238			6.622				148.065											468797	1952829	1862113	2129903	4
180	Features239			6.623				318.157												8558003	7614624	8902815	3
181	Features240			6.629				512.277											2069517	10421545	9186321	11113613	4
182	Features241			6.631				335.119											482772	1110222	1921369	2267981	4
183	Features242			6.632				226.069											282178	550219	1120595	1457972	4
184	Features243			6.633				457.231												155187923	149102769	164605507	3
185	Features244			6.633															133312	367890	529366	633513	4
186	Features245			6.633				254.13											352722	1568200	1412587	1528358	4
187	Features246			6.638				371.187											1215716	3335050	4296928	4561809	4
188	Features247			6.638				293.199												977399	967350	895824	3
189	Features248			6.638				250.138											468797	1952829	1862113	2129903	4
190	Features249			6.638				403.181											315561	881845	1245217	815581	4
191	Features250			6.649				315.092											291389				1
192	Features251			6.725				217.183												4592384	4759963	2113829	3
193	Features252			6.732				176.156											22136	140581	176673	170954	4
194	Features255			6.775				287.188												3601235	3759014	3408149	3
195	Features256			6.777				132.093	132.093										597269	1219075	975566	1178638	4
196	Features257			6.79				260.083													639594	710012	2
197	Features258			6.795				414.352											69130	1104651	982832	978831	4
198	Features259			6.795				146.076											112903		1172927	1198518	3
199	Features260			6.815				170.094												16570503	1079617	6431354	3
200	Features262			6.846				234.14											1561275	25419385	18546697	19320134	4
201	Features263			6.864				140.083												3807824		1248582	2
202	Features264			6.873				130.062											16636	655838	426597	446260	4
203	Features265			6.876				172.146											533572	7004551		2474331	3
204	Features267			6.882				126.104												1573195	963942	1506596	3
205	Features270			6.979				266.224												753881	370852	632457	3
206	Features271			6.983				159.984	159.984											2726326	1542846	2495792	3
207	Features272			6.986				180.114												374854		666794	2
208	Features273			6.988				232.113												753881	370852	632457	3
209	Features274			7.001				366.028												752343		152813	2
210	Features276			7.024				150.104											31340	462771	250038	383782	4
211	Features278			7.053				136.088												3622129	3069253	2915800	3
212	Features281			7.078				256.203											217492	2537307	1515780	1592470	4
213	Features282			7.109				312.15												679127	561131	233030	3
214	Features283			7.114				270.201											303924	8707480	7169981	2373211	4
215	Features284			7.134				164.131													1149544		1
216	Features285			7.136				195.125												171929			1
217	Features286			7.143				254.224											115956	1707934	1525680	1186682	4
218	Features287			7.152				184.157											185348	1404165	1111587	1085476	4
219	Features289			7.188				254.13											3461774	19303379	17519476	17539868	4
220	Features290			7.194				218.13											98845	773223	924314	643032	4
221	Features291			7.203				350.151											330551	588871	406151		3
222	Features292			7.21				164.12												2907785	3336774	3140927	3
223	Features293			7.248				128.156											175229	1073649	1370065	465940	4
224	Features294			7.253				514.14											123311	38294	43024		3
225	Features295			7.289				279.158											998730	3111489		2360854	3
226	Features296			7.295				218.167											17830	207539	196719	87357	4
227	Features297			7.313				163.099												1788780	1781484	3326753	3
228	Features298			7.329				124.088											998730	4625364		3908078	3
229	Features299			7.338				267.089											36760			84275	2
230	Features301			7.376				210.14											1408462	23092406	22831006	8381310	4
231	Features302			7.381				198.143												678196	711372	396316	3
232	Features303			7.381				86.0362											88560	583885	824136	278000	4
233	Features304			7.435				130.062												6482439	1781484	3326753	3
234	Features308			7.491				336.149												28804985	980164	12097307	3
235	Features310			7.504				291.147												803169	100642	383524	3
236	Features311			7.511				112.088											1645	38528	11533	44199	4
237	Features312			7.531				210.125											123161	561201	645536	630071	4
238	Features313			7.572				97.0886	97.0883										181951	777972	917254	817238	4
239	Features314			7.578				184.059											144878	875592	675842	720643	4
240	Features315			7.583				130.099												182520	108274	159998	3
241	Features316			7.59				214.193											73109	431379	377687	401112	4
242	Features317			7.621				144.114												262000		90266	2
243	Features319			7.661				244.109												71137		77079	2
244	Features321			7.673				84.0841	84.0839										267861	1925107	72150	139759	4
245	Features322			7.713				270.165											8692	140342	36043	77543	4
246	Features323			7.715				280.062											228051	1489296	787266	1510999	4
247	Features324			7.724				128.062	128.062											1073143	685478	1192001	3
248	Features325			7.724				240.162											187579	717360	714156	647388	4
249	Features326			7.729				140.12											66391	1118904	91857		3
250	Features327			7.729				138.104											42377	343680	157018	317986	4
251	Features328			7.733				311.166												2752909		2420767	2
252	Features329			7.742				208.146											208920	728791	742204	773385	4
253	Features331			7.774				110.073											54461		308782	277820	3
254	Features333			7.785				246.194											142703	714180	309145	577664	4
255	Features334			7.789				146.109	146.108										100387		405400	313142	3
256	Features335			7.794				228.091											82167	634768	445519	358720	4
257	Features336			7.801				297.997											59420	29524894	1534541	10113750	4
258	Features337			7.803				190.112											31669	18700331	944709	6352353	4
259	Features338			7.805				192.091												964567	10933	367306	3
260	Features339			7.864				278.151												297181	327879	152434	3
261	Features340			7.877				152.047	152.046										764670	3391243	2962679	2788006	4
262	Features341			7.884				390.298												1248117	1236864	441858	3
263	Features342			7.926				192.096												81434	105635	85812	3
264	Features343			7.951				148.125	148.124										5137556	22056293	21181556	19825095	4
265	Features344			7.958				160.125											89391	351301	306696	250999	4
266	Features345			7.96				160.088												160376			1
267	Features346			7.962				146.109											1709929	7452161	7271027	6777707	4
268	Features347			7.962				404.213											139747	569239	462510	416852	4
269	Features348			7.971				293.141											185272	983640	828123	787707	4
270	Features349			7.978				168.187											25658178	179665428	176858578	108462991	4
271	Features350			7.983				310.177											278839	2132180	2092287	1238892	4
272	Features352			8.072				138											535678	1637727	1526432	1305791	4
273	Features354			8.081				124.088											368966	2128956	1467343	1762438	4
274	Features355			8.083				112.052											368966	2128956	1467343	1762438	4
275	Features356			8.086				182.167											16557	73251	57290	62495	4
276	Features357			8.09				157.073											31849	52649	38003	54528	4
277	Features358			8.153				230.167											156445	777131	670292	720499	4
278	Features359			8.187				200.071											231326	680032	735134	551994	4
279	Features360			8.189				230.17												11946189	7351781	5224564	3
280	Features361			8.239				156.187												238445	302837	180640	3
281	Features362			8.268				187.875	187.874										1698288	16593287	12517298	9192633	4
282	Features363			8.34				148.125	148.124										76802	453751	475244	298500	4
283	Features365			8.358				184.029											720659	1092652	1219327	974467	4
284	Features367			8.438				358.178											209221	294278	288062	278656	4
285	Features368			8.452				518.131											705437	1276790	1235542	1058202	4
286	Features369			8.47				180.151	180.15										54663	2821650	244064	1481847	4
287	Features370			8.503				126.104														8492656	1
288	Features374			8.575				235.084											150830	284652	149172	192602	4
289	Features375			8.575				90.0464											151785	478647	502953	460335	4
290	Features377			8.609				401.183												138289		93408	2
291	Features379			8.676				260.177											267536	788122	877225	745653	4
292	Features381			8.68				194.167												874957	1207621	564824	3
293	Features382			8.689				187.157														687253	1
294	Features383			8.69				371.126												1148473	1546004	902388	3
295	Features384			8.701				146.109											416067	1686136	1551413	1455067	4
296	Features385			8.721				141.061	141.06										80815	573504	740562	530986	4
297	Features386			8.733				262.159												280020	56904	120349	3
298	Features387			8.755				230.047											84743	281388	222921	167017	4
299	Features388			8.768				170.13											51380	1676835	157923	333454	4
300	Features389			8.773				200.141											425377	363359		424821	3
301	Features390			8.78				144.126												141889	112217	79657	3
302	Features393			8.82				238.193											3468	469279	950187	271248	4
303	Features394			8.834				400.192											203619	306216		529183	3
304	Features395			8.843				234.048												517092	7039	232055	3
305	Features396			8.845				182.13												1213195	228050	578118	3
306	Features397			8.863				100.052												404755	494820	518864	3
307	Features398			8.867				264.136												407162	522689	254682	3
308	Features399			8.872				390.276												433923	589474	219831	3
309	Features400			8.896				148.088	148.088										629638	952452	1082757	932034	4
310	Features401			8.896				191.142											50526	70331	91212	83844	4
311	Features403			8.944				403.192											109937	113319		167429	3
312	Features404			8.975				140.083	140.083										2495298		2851459	3248979	3
313	Features406			9.02				113.084	113.083											1046188			1
314	Features411			9.074				210.234												36601029	38661824	20819705	3
315	Features413			9.103				155.094											88911	113798	109737	126281	4
316	Features414			9.106				384.128											541809	784478	727258	807519	4
317	Features415			9.108				344.183											188399	310026	344334	310980	4
318	Features416			9.11				212.104											1510161	2282490	2304742	2318183	4
319	Features417			9.121				86.0726											188399	310026	344334	310980	4
320	Features418			9.132				144.114											787508	1697730	1701579	1759315	4
321	Features419			9.184				356.184												98329		145375	2
322	Features420			9.184				128.156												1121428	1276826	709558	3
323	Features421			9.191				140.12												10315080	12788262	6359831	3
324	Features422			9.193				126.14												2643006	3002357	1459685	3
325	Features423			9.206				170.13												1081535		212519	2
326	Features424			9.24				220.131												10968016			1
327	Features426			9.258				170.08											618957	1300708	895185	767175	4
328	Features427			9.259				112.125												9176975	8311660	5387911	3
329	Features428			9.26				252.158												1300708	895185	767175	3
330	Features429			9.262				244.24												1178419	1129137		2
331	Features430			9.267				101.084											158301	729230	502360	376954	4
332	Features431			9.271				292.131											313621	717256		573373	3
333	Features432			9.28				107.997											181928	541840	422722	406923	4
334	Features433			9.285				196.109											91991	235592	195896	257594	4
335	Features434			9.287				189.019											170675	359508	345719	397666	4
336	Features435			9.292				314.224												119760	193140		2
337	Features436			9.297				142.172											3875844	8325997	9537848	8520761	4
338	Features437			9.303				140.12											750897	1587827	1889329	1620352	4
339	Features439			9.307				206.13											718948	1861656	1823106	1799074	4
340	Features440			9.307				241.106												1391852	1824442	887990	3
341	Features441			9.312				200.104												701076			1
342	Features442			9.35				350.164												5612467	5765528	5109121	3
343	Features444			9.388				110.109											105151	927791	1429110	552494	4
344	Features445			9.404				622.001											182106	105148	92906	324647	4
345	Features446			9.408				146.109	146.108										929716	2687297	2749438	2423718	4
346	Features448			9.426				172.168											2053129	10033315	14165359	6230902	4
347	Features449			9.435				304.312											2817785	4816797	2631361	5583517	4
348	Features450			9.447				126.14	126.14											4327746	6192452	2506371	3
349	Features452			9.474				168.096												1004360	1263749		2
350	Features453			9.53				140.12												372318	351854		2
351	Features454			9.532				168.187												462137383	546521667	273774253	3
352	Features455			9.554				190.099											286710	907775	668771		3
353	Features456			9.554				280.167											1188464	3116831	2460375		3
354	Features457			9.566				148.088	148.088										1188464	3116831	2460375	3068106	4
355	Features458			9.577				268.146											94300			85342	2
356	Features459			9.615				142.099												3194068	181678	1186174	3
357	Features460			9.622				172.109													145151	150928	2
358	Features462			9.632				128.12												188263	145151	150928	3
359	Features463			9.633				313.131											53275	92919	128947	68879	4
360	Features464			9.64				135.068	135.067										688009	1146933	1577380	975035	4
361	Features465			9.649				216.151											150342	368395	400233	355541	4
362	Features466			9.649				132.057	132.057										150342	368395	400233	355541	4
363	Features467			9.655				148.125	148.124										3728706	8242734	8315599	8272658	4
364	Features470			9.682				214.156												16394914	882056	6470819	3
365	Features471			9.709				260.083											2651835	6428802	6307843	6260982	4
366	Features473			9.718				100.068												387850	527604	263627	3
367	Features474			9.723				324.266												290591	79598	135815	3
368	Features476			9.736				166.172											72616	508088	203087	205608	4
369	Features477			9.765				234.125												6986917	5814919	5851162	3
370	Features478			9.77				222.064												344537	406568	314538	3
371	Features479			9.774				164.06											40493	160645	25214		3
372	Features480			9.813				177.151											128746	404102	382268	343927	4
373	Features481			9.831				196.206												1157101	1293694	695612	3
374	Features482			9.835				168.187												83026318	94925839		2
375	Features483			9.837				180.151												1157101	1293694	695612	3
376	Features484			9.842				196.219													1323937		1
377	Features485			9.844				150.104													1411884	1191261	2
378	Features486			9.855				168.114												405788	339949	369430	3
379	Features487			9.864				132.114											25835	890993	29152	303335	4
380	Features488			9.871				232.094											257713	766713	525373	646494	4
381	Features489			9.871				100.088	100.088										25835	890993	29152	303335	4
382	Features490			9.878				170.167	170.166										113183	568871	257504	358974	4
383	Features491			9.885				184.109												2663028	1085459	1759185	3
384	Features492			9.889				126.068	126.067											7497090	7433971	2721760	3
385	Features495			9.907				326.174												410491	364630	286052	3
386	Features496			9.92				210.004											47002	69709	145153	110808	4
387	Features497			9.92				146.109	146.109											284602	290427	209387	3
388	Features498			9.943				488.04											1211310	2892996	2499319	2610251	4
389	Features499			9.947				322.058												1100811	1652818	587333	3
390	Features500			9.968				188.104												212531	15239	88804	3
391	Features501			9.992				168.187												84883382	110209800		2
392	Features502			9.997				170.13												12259481	17633468		2
393	Features503			9.999				248.062												1577900	2244723		2
394	Features504			10.006				180.151												3719621	5218625	2436332	3
395	Features505			10.01				149.029	149.029										82352	280969		182167	3
396	Features506			10.027				228.183												5798590	5603928	4763868	3
397	Features507			10.028				536.336												5798590	5603928	4763868	3
398	Features508			10.035				433.225												4335924	7115628		2
399	Features509			10.044				154.135											48784	81031	17252	104149	4
400	Features511			10.064				226.266												178459156	252026475	120651053	3
401	Features512			10.066				206.13											193683	854709	686208	737195	4
402	Features513			10.073				156.114												35371130	40910759	21051412	3
403	Features514			10.101				570.197											946682	1085109	1269151	1424282	4
404	Features515			10.102				314.172											1693844	1958881	1929784	2497195	4
405	Features516			10.103				450.117											3971221	4688601	4763162	6452925	4
406	Features517			10.104				452.098											2023096	2175572	2123440	3109558	4
407	Features518			10.105				338.998											3596657	3948747	3941853	5147045	4
408	Features519			10.105				362.09											20155340	25614748	25763802	33627444	4
409	Features520			10.107				535.146											3971221	4688601	4763162	6452925	4
410	Features521			10.11				579.439											6645275	7864574	8068757	11001572	4
411	Features522			10.11				314.126											2315710	2703755	2829787	2198351	4
412	Features523			10.111				214.12											3835452	4534178	4882723	6184085	4
413	Features524			10.111				670.256												873442	1055443	1202768	3
414	Features525			10.111				485.104											9993711	11872988	12048610	15904410	4
415	Features526			10.112				285.072											1675075	2099495	2169184	2816139	4
416	Features527			10.112				454.21											3971221	4688601	4763162	6452925	4
417	Features528			10.113				550.885											2604656	3076406	3031272	4110524	4
418	Features529			10.113				421.201											2859430	3326914	3500175	5044618	4
419	Features530			10.114				414.352											3710910	4944262	5141814	5859431	4
420	Features531			10.118				1496.91											619033519	741414711	760458608	1009647546	4
421	Features532			10.119				472.184											1382403	1633085	1602693	2154413	4
422	Features533			10.121				235.084											21596083	25054162	26008606	34748194	4
423	Features534			10.122				222.107											1693844	1958881	1929784	2497195	4
424	Features535			10.123				402.059											3835452	4534178	4882723	6184085	4
425	Features536			10.136				220.182											828415		6415905		2
426	Features537			10.138				170.13											367490	730001	565255	432005	4
427	Features538			10.145				206.094											48811	2156557	119295	597320	4
428	Features539			10.147				190.099												91136	38458		2
429	Features540			10.158				168.114	168.114											487166	477584	415278	3
430	Features541			10.19				416.122											155098	376347	289704	363286	4
431	Features542			10.19				568.037											2412886	5663765	4519927	5271621	4
432	Features543			10.196				112.052											783023	2708862	1544200	1890153	4
433	Features544			10.197				250.193											783023	2708862	1544200	1890153	4
434	Features546			10.201				312.339												14717918	9988973	10199923	3
435	Features547			10.235				194.167												1462243	1296451	1206073	3
436	Features549			10.25				158.071												4244829	2991603	1565737	3
437	Features550			10.251				150.104											470905	2045660	1905966	791611	4
438	Features551			10.255				256.276												78938671	58340483	34018843	3
439	Features552			10.259				182.13											2163894	9984135	7239917	4215602	4
440	Features553			10.266				240.11												744266		677743	2
441	Features555			10.32				292.131												222565	305591	142745	3
442	Features556			10.336				178.135	178.135											164128	86455	124554	3
443	Features558			10.36				176.035												504395		146016	2
444	Features559			10.363				259.977											70368	7745122	608746	2591203	4
445	Features561			10.384				238.193												4449657	5539996		2
446	Features562			10.385				226.266												92888806	114444405		2
447	Features563			10.385				172.168												857691	1075617		2
448	Features564			10.417				352.188												699347		369420	2
449	Features565			10.421				200.141												13944378	15550428	7459866	3
450	Features566			10.423				278.151											4269320	9252019	8577213	8574629	4
451	Features567			10.432				304.312												47780626	34576575	17026360	3
452	Features568			10.461				160.109												238904	201393	368517	3
453	Features569			10.491				221.129											1400866		2821227		2
454	Features570			10.497				236.104												465656	363393	379416	3
455	Features572			10.511				168.187												299649025	379039014		2
456	Features573			10.514				358.163												5333817	7687323		2
457	Features574			10.536				263.136												862139	625107	817233	3
458	Features576			10.556				275.206											181946	356572	358417	273168	4
459	Features577			10.558				401.184											203115	270291	261489	213114	4
460	Features578			10.56				603.007											218684	136828	134215	350272	4
461	Features579			10.56				470.262											156227	243001	230858	205780	4
462	Features580			10.567				182.13											218439	375843	358404	309426	4
463	Features581			10.567				248.141											95612	40641	70895	146641	4
464	Features582			10.574				408.139											824051	1095424	1022066	901676	4
465	Features583			10.628				215.134														1904104	1
466	Features584			10.64				140.12												449192	118891		2
467	Features585			10.648				226.12											1203093	2737333	2770043		3
468	Features586			10.65				271.133													178738		1
469	Features587			10.655				206.094											482154	1058081	941113	970634	4
470	Features588			10.668				436.001											225327	379017	329568	292104	4
471	Features589			10.67				419.106											367489	320589	294442	284324	4
472	Features590			10.686				156.151											97351	305518	162523	226002	4
473	Features591			10.693				240.172												110324720	6228467	43086389	3
474	Features593			10.724				174.104												931862	953934		2
475	Features595			10.733				415.109												1368618	1001908	670446	3
476	Features596			10.734				212.177												1368618	1001908	670446	3
477	Features597			10.735				194.203											139775	1460836	503753		3
478	Features598			10.742				263.074												4457109	1434179	2229044	3
479	Features600			10.747				193.945	193.945											9150547	12206915		2
480	Features601			10.751				154.135												843480	1268254		2
481	Features602			10.76				270.183												1172507			1
482	Features603			10.762				310.214												660969			1
483	Features605			10.774				144.078	144.078											4739475	4351958	3217590	3
484	Features606			10.774				236.177												660969	464711	725903	3
485	Features607			10.789				204.114											116606	307334	223003	227824	4
486	Features608			10.794				207.173											80773	389238	118639	273931	4
487	Features609			10.798				104.062	104.062										55657	265685	94194	192395	4
488	Features610			10.801				124.034											22279	134971	105256	115213	4
489	Features611			10.812				328.156											117572	392602	349356	293732	4
490	Features612			10.816				160.125	160.124										246035	925516	588409	897442	4
491	Features613			10.828				252.172												2145291	1773398		2
492	Features614			10.843				172.128												256194	269282	210067	3
493	Features616			10.89				130.099												201428	159482	172900	3
494	Features617			10.892				128.12												2242845	3145481		2
495	Features618			10.893				236.177											69769	121782	155741	122444	4
496	Features619			10.902				168.187												113560132	158153877		2
497	Features620			10.906				126.023												1287381	472098	701810	3
498	Features621			10.91				196.146												1287381	472098	701810	3
499	Features622			10.911				166.031	166.03											3829004	1269723	1958298	3
500	Features623			10.915				574.081											567580	691911	670649	591599	4
501	Features624			10.922				170.13											119508	214418	149875	127798	4
502	Features625			10.926				338.245											140570	211711	280916	260460	4
503	Features626			10.971				254.188											139865	353072	223594	220433	4
504	Features627			10.973				271.087											94351	497424	418536	223232	4
505	Features628			10.978				136.125											349454	1724402	1449456	796891	4
506	Features629			10.982				208.146	208.145										9418661	48871595	41072617	22263059	4
507	Features630			10.989				172.029	172.028											198970	216987	190738	3
508	Features631			10.989				322.177											198174	569157	432662	313197	4
509	Features633			11.007				149.084											262037	274066	379887	347072	4
510	Features634			11.007				149.084											242196	252708	325666	295738	4
511	Features635			11.018				160.125	160.124										262037		379887	347072	3
512	Features637			11.03				262.229											191648	628535	920292	264136	4
513	Features639			11.034				170.13											661921	80369582	5439785	31697411	4
514	Features641			11.039				240.136													361962		1
515	Features642			11.041				222.198											4384710	14755043	8262861	8055829	4
516	Features643			11.043				477.131												202417	316705	166434	3
517	Features645			11.048				138.14												5606297	8149353	4131815	3
518	Features646			11.061				251.951											111683	186332	174701	185395	4
519	Features647			11.068				232.005												498368			1
520	Features648			11.07				211.039											762322		62729	784375	3
521	Features649			11.081				252.136												428175		418027	2
522	Features650			11.081				148.088	148.088											393046	304794	396094	3
523	Features651			11.086				164.12	164.119											68387798		66135663	2
524	Features652			11.086				174.14											3588983	5543817	6080971	4187242	4
525	Features653			11.088				323.119												532602		526630	2
526	Features654			11.095				70.0777												10363588	11278634	8963094	3
527	Features655			11.099				128.15													1401631		1
528	Features656			11.101				999.069													71295086		1
529	Features657			11.106				204.239													1401631		1
530	Features658			11.113				344.289													6617776		1
531	Features659			11.16				322.135													938573		1
532	Features660			11.163				212.25											23298690	51668869		36846127	3
533	Features661			11.167				322.135												597220	524914	378979	3
534	Features663			11.19				250.193												1661324			1
535	Features664			11.196				648.388											1345065	1657576	1572145	1353876	4
536	Features665			11.196				264.136											104193	74206		77480	3
537	Features666			11.2				408.196											373426	443367	422928	385965	4
538	Features667			11.204				310.287												891229	1002677		2
539	Features668			11.205				170.13												3628209		1675750	2
540	Features669			11.205				226.156											45939	40656		36080	3
541	Features670			11.216				246.161											569965	805766	707384	689805	4
542	Features671			11.22				182.094														103226	1
543	Features672			11.229				424.182											71380	230418	111968		3
544	Features674			11.27				116.047											1340287	2020075		1710871	3
545	Features675			11.272				186.125											1340287	2020075	2118156	1710871	4
546	Features676			11.274				999.069													147589		1
547	Features677			11.274				302.088											274426	397946	415391	341390	4
548	Features678			11.288				244.167												62506	101250		2
549	Features679			11.328				296.152												852059	785240	708015	3
550	Features680			11.342				574.081											101986	207993	93073	155645	4
551	Features681			11.348				210.198											394755	475053	412661	392277	4
552	Features683			11.364				385.142												328455		153518	2
553	Features684			11.366				327.189												328455		153518	2
554	Features685			11.371				278.134												532074	457932	230050	3
555	Features687			11.38				288.172													2322108	1461087	2
556	Features688			11.386				96.0934												269270			1
557	Features689			11.389				280.167											1216857	2686688	1966767	1612955	4
558	Features690			11.393				164.12											144568	293690	215631	167847	4
559	Features691			11.394				134.109												643330	657185	502012	3
560	Features692			11.396				604.688													389797		1
561	Features694			11.401				246.144													1921971		1
562	Features696			11.402				168.078													1389390		1
563	Features697			11.42				285.1												35576466			1
564	Features698			11.474				118.078	118.077										43403	62968	60396	64078	4
565	Features699			11.474				436.001											451391	430190	334084	391556	4
566	Features700			11.53				154.062													503161		1
567	Features701			11.534				156.151												1268882	1549941		2
568	Features702			11.535				210.14												56069759	65972336		2
569	Features703			11.535				296.245													2837704		1
570	Features704			11.535				198.136													739120		1
571	Features705			11.542				276.136													1576801		1
572	Features706			11.546				68.062	68.0619										311946	1107048	469572	959334	4
573	Features707			11.546				316.142											58973	202565	41350	166814	4
574	Features708			11.551				170.13											311946	1107048	469572	959334	4
575	Features710			11.562				146.094												76851720	72487035		2
576	Features711			11.566				198.125												454726	488322		2
577	Features712			11.577				375.143												482934	598036	384433	3
578	Features713			11.58				404.137											75214	46109	34343	75586	4
579	Features714			11.582				324.157												179074	35817	78808	3
580	Features715			11.587				402.189											1709374	1311364	1355449	1829492	4
581	Features716			11.591				487.148											1090596	899033	911794	1188560	4
582	Features717			11.6				174.14	174.14										227917	398758	336033	376725	4
583	Features719			11.634				305.199												746831	520458	534769	3
584	Features720			11.636				999.069													381975		1
585	Features721			11.64				158.109	158.109										1484162	1465294	1454097	2166072	4
586	Features722			11.643				96.0934											158907	243611	272098	221599	4
587	Features723			11.665				288.136												420101	602169		2
588	Features724			11.67				138.14												299144	274190	200465	3
589	Features725			11.674				361.188												116125	21469	73452	3
590	Features726			11.676				212.156												931663	1189239		2
591	Features727			11.679				164.131											215455	385720	494011	317141	4
592	Features728			11.681				398.245											215455	385720	494011	317141	4
593	Features729			11.726				198.125											210184	393625	359610	450505	4
594	Features730			11.735				204.187	204.186										639023	978494	571960	1642478	4
595	Features731			11.737				138.104	138.104										9220	29211		28884	3
596	Features732			11.743				256.146												121710	73467	97852	3
597	Features733			11.748				204.187	204.187											702675	488846	616641	3
598	Features734			11.75				192.151												1084430	1243097	756313	3
599	Features735			11.755				474.193													1514742	1645753	2
600	Features738			11.84				202.12													2707208	2447212	2
601	Features739			11.849				194.115												3172486			1
602	Features740			11.865				170.13												53391	56631		2
603	Features741			11.871				254.188											149955	167937	240650	142598	4
604	Features742			11.874				180.151											383577	274967	243834	360225	4
605	Features743			11.878				222.161											178563	171546	154555	197506	4
606	Features744			11.91				150.068	150.067										30458	77075	44138	60905	4
607	Features745			11.91				249.184												771068	541123	605967	3
608	Features746			11.912				309.041												1237525			1
609	Features747			11.917				563.973											3054574	3449361	3244264	2796385	4
610	Features748			11.918				422.139											155566	217566	198367	376999	4
611	Features749			11.919				290.151											110728	171873	197856	128380	4
612	Features750			11.919				453.069												202036	186658	293452	3
613	Features751			11.926				406.135											139712	231491	242846	447449	4
614	Features752			11.926				353.111											127168	220517	234614	399205	4
615	Features753			11.928				458.164											1069915	1431522	1362263	2653427	4
616	Features754			11.952				222.198												267797	276138	333164	3
617	Features755			11.976				310.141														126745	1
618	Features756			11.986				214.156											44389	33523	38310	72292	4
619	Features757			11.988				362.391											582586	971963	976454	787554	4
620	Features758			11.993				258.125												1681171	1569407	1430092	3
621	Features759			12				184.146												323041	287075	256701	3
622	Features760			12				224.177												163837	139412	128373	3
623	Features761			12.011				507.165												177374	85628	74616	3
624	Features763			12.031				182.094											872200	1257327	794186	979987	4
625	Features764			12.038				243.183												761584	399497	505065	3
626	Features765			12.049				126.14													20830241		1
627	Features766			12.058				200.141											582586				1
628	Features767			12.063				242.079											547719	893861	921249	879662	4
629	Features768			12.065				156.114												417750	436573	378072	3
630	Features770			12.083				194.13											99897	134189	207438	205251	4
631	Features771			12.09				217.149												181919		142206	2
632	Features773			12.114				286.141													1257991		1
633	Features775			12.134				204.187	204.186										297105	905393	646256	721173	4
634	Features776			12.148				207.125													18899347		1
635	Features777			12.152				442.377												263339	278927		2
636	Features778			12.155				168.187	168.187											7745642	8516959		2
637	Features779			12.161				436.275												1380019			1
638	Features780			12.168				281.144												1380019	1589283		2
639	Features781			12.193				188.083											3296449	6336844	4790782	4691922	4
640	Features783			12.204				158.094											44640	396153	106927	184588	4
641	Features784			12.205				374.185												3732598	4580303		2
642	Features785			12.213				272.122												2461186		2134045	2
643	Features786			12.226				299.212												156553	199344		2
644	Features787			12.235				292.167												1194028	1374474	990690	3
645	Features788			12.285				130.099											706771	837160			2
646	Features789			12.287				180.114											72877257	80845039		28976193	3
647	Features790			12.292				138.068											1813631	2047583		714940	3
648	Features792			12.3				170.057											1551102	1878483			2
649	Features793			12.305				150.044											3354563	4188772			2
650	Features794			12.307				136.088											608251	1122742		1111634	3
651	Features795			12.307				110.109											42291013	53717301			2
652	Features796			12.308				317.032											1544419	2258310		1653069	3
653	Features797			12.312				158.071											102416	141500	180924	198594	4
654	Features798			12.316				310.141												374753			1
655	Features799			12.318				210.198											2823506	3435026			2
656	Features801			12.327				182.13												2021368	1583423	1724718	3
657	Features802			12.348				160.128											252352	273220	214972	241386	4
658	Features804			12.35				160.128												330017	321962		2
659	Features806			12.378				184.157												496166	595908		2
660	Features807			12.379				168.187												6077980	6288006		2
661	Features808			12.384				183.125												2458887	2372613	1755134	3
662	Features809			12.388				184.219												3097451	2965372	2221444	3
663	Features810			12.395				148.125												338212	275091	288211	3
664	Features811			12.401				388.163												487421	270503	392141	3
665	Features812			12.406				348.063											313607	645020	729619	558326	4
666	Features813			12.411				237.136												2262012	1531082	1853847	3
667	Features814			12.413				128.12											141952	181922	224882	229097	4
668	Features815			12.42				346.08												6354955	1738521	5021143	3
669	Features816			12.435				250.156													1082154		1
670	Features817			12.437				210.081											93952	108207	104613	49084	4
671	Features820			12.46				266.151												804744	678673	612933	3
672	Features821			12.462				272.125												520427	547870	612795	3
673	Features822			12.469				304.185												350029	289592		2
674	Features823			12.47				142.099												350029	289592		2
675	Features824			12.471				230.07												870803	627483	802838	3
676	Features825			12.473				188.123												590352	524096	543023	3
677	Features826			12.475				282.092												590352	524096	543023	3
678	Features827			12.476				283.103												128839	77867		2
679	Features828			12.476				204.187	204.187											12277771	10544564	11852141	3
680	Features829			12.478				138.104											429324	1643037	544959	1068058	4
681	Features830			12.478				207.961												367719	374601	369595	3
682	Features831			12.485				226.266												394734	359244	259939	3
683	Features833			12.5				210.125												5140373	126727	1741109	3
684	Features834			12.565				216.114											237954	366123	236641	99070	4
685	Features835			12.568				160.128												1678942	1276918		2
686	Features836			12.57				292.182													267518		1
687	Features837			12.574				198.089												1288067			1
688	Features838			12.577				198.125												195760	177016		2
689	Features839			12.579				224.177												164843	171766		2
690	Features840			12.58				540.171												193400	177793	154673	3
691	Features841			12.583				268.24												341205	328787		2
692	Features842			12.583				200.141												1717672	2014179	1460919	3
693	Features843			12.586				340.261												1502009	1338313		2
694	Features844			12.595				328.203												292060		283191	2
695	Features846			12.628				162.05	162.049											284642	173920	234359	3
696	Features847			12.633				380.103												471473	83925	199336	3
697	Features848			12.646				368.151											110711	202726	185637	143027	4
698	Features849			12.649				310.156											115031	119318	147454	139630	4
699	Features851			12.691				280.153												2136195	1469109	1654693	3
700	Features852			12.709				174.14												297908	378084	250184	3
701	Features853			12.716				290.151												211107	243080		2
702	Features854			12.725				192.187	192.187											465295	453712	365426	3
703	Features856			12.741				191.13													373582		1
704	Features857			12.752				315.147												300723	227169	224085	3
705	Features858			12.756				190.135												191636	198492		2
706	Features859			12.761				178.099	178.098											287793	280513	221899	3
707	Features860			12.765				238.193												119383	97309	86170	3
708	Features861			12.765				260.123													14343380		1
709	Features862			12.765				308.144												2878308	2616266		2
710	Features863			12.808				240.151											2132413	2916318	2851526	2832680	4
711	Features864			12.812				284.198											10193	527187	18902	179665	4
712	Features865			12.815				230.167												998808			1
713	Features867			12.819				214.193												299601	144324	129059	3
714	Features868			12.828				366.183											51183	61917	42904	49841	4
715	Features869			12.83				286.102												866637	1145724	687700	3
716	Features870			12.83				258.125											76677	253775	186243	113358	4
717	Features872			12.869				170.13												114509		58430	2
718	Features873			12.869				166.062	166.062													342864	1
719	Features874			12.88				234.198												435906	486838	354587	3
720	Features876			12.888				128.156												217359	217110	221563	3
721	Features877			12.895				328.188													317136		1
722	Features878			12.9				170.094											936928	817043	664639	998316	4
723	Features879			12.911				172.125												2826411		3664304	2
724	Features881			12.92				192.151	192.15													2820101	1
725	Features883			12.929				189.019												559194		556284	2
726	Features884			12.933				256.157												277430		259258	2
727	Features885			12.938				189.115												4387101		4466486	2
728	Features886			12.938				520.236												282281	151800	211592	3
729	Features887			12.94				233.12												277430		259258	2
730	Features889			12.949				222.104												277430		259258	2
731	Features890			12.952				193.085												635805		702910	2
732	Features891			12.97				190.172	190.171											298705	257704		2
733	Features892			12.99				296.18											608973	834001	829837	742996	4
734	Features893			12.992				174.14	174.14										134864	142884	121269	116241	4
735	Features894			12.993				400.185											163257	205125	194591	253775	4
736	Features895			12.994				222.234													2761798		1
737	Features896			13.03				462.234											306409	329243	252929	271133	4
738	Features897			13.05				188.12													2976566		1
739	Features898			13.06				188.12											147830	113030	82590	134843	4
740	Features900			13.112				386.209												329529	346074	313839	3
741	Features901			13.118				160.088	160.088											372134	396366	406494	3
742	Features902			13.12				185.141												19458	48584	23548	3
743	Features903			13.122				204.151												329529	346074	313839	3
744	Features904			13.122				144.078												499552	498518	445976	3
745	Features905			13.156				140.156	140.155											1461433	1625377	1417537	3
746	Features906			13.157				128.156														1417537	1
747	Features907			13.176				112.125	112.124										186649	256268	306243	268172	4
748	Features908			13.178				138.14													1045129		1
749	Features909			13.183				210.234													44073564		1
750	Features910			13.187				170.109												795202	813841		2
751	Features911			13.196				154.018												2421425	310394	1528184	3
752	Features912			13.205				217.966												642523	661688	617624	3
753	Features913			13.208																466730	3916	255115	3
754	Features914			13.213				306.111											720475	1050498	1147938	951857	4
755	Features915			13.217				181.146											186203	677902	259201	421552	4
756	Features916			13.217				302.103												642523	661688	617624	3
757	Features917			13.219				218.13											77354	101095	139322	109947	4
758	Features918			13.221				218.167											125470	377273	162426	182105	4
759	Features919			13.23				156.078												2678809		1139906	2
760	Features921			13.273				138.068											129059	195738	188816	179137	4
761	Features922			13.277				208.146	208.145										17231792	27552319	26262635	20083314	4
762	Features923			13.284				339.15											478778		609759	487392	3
763	Features924			13.286				223.157											286321	262205	217427	175876	4
764	Features925			13.295				302.155											155015	223602	56269	122915	4
765	Features926			13.297				546.231												496956	547724	457209	3
766	Features928			13.304				142.062												331560			1
767	Features930			13.313				204.126												6465066	6179626		2
768	Features931			13.313				411.144												1211651		1106019	2
769	Features932			13.316				171.125												1348188	1283911		2
770	Features933			13.319				272.271											466348	511929	407123	384053	4
771	Features934			13.327				448.173											501002	755961	382117	288687	4
772	Features935			13.332				362.391												13233552	12996397		2
773	Features936			13.338				194.13												347994	308070	298406	3
774	Features937			13.34				536.145													3165627		1
775	Features938			13.34				240.208												233224	167646	151172	3
776	Features939			13.369				76.0339												273733	336322	225381	3
777	Features940			13.383				163.099												1471226			1
778	Features941			13.387				246.161												1546927	1639873		2
779	Features943			13.394				212.159											1472259	1781900			2
780	Features944			13.464				207.198													893812		1
781	Features946			13.515				505.109											244446	264249	241699	205028	4
782	Features947			13.518				377.139													289438		1
783	Features948			13.522				236.141												1650786	1876081		2
784	Features949			13.525				212.083												447361	463656	378180	3
785	Features950			13.529				278.188													9274633		1
786	Features951			13.535				138.068												305314	289438		2
787	Features952			13.568				402.044											1809878	1656611	1407686	2328897	4
788	Features953			13.571				568.294											6376793	5872224	5680121	8192568	4
789	Features954			13.572				465.215											16470644	15567893	15479266	21424639	4
790	Features955			13.574				387.183											3425406	3139258	3409211	4629103	4
791	Features956			13.574				393.168											2172767	2345924	2469400	2879196	4
792	Features957			13.574				400.12											49743327	46921591	47867446	64729057	4
793	Features958			13.577				459.353											11888297	10635550	10686317	15198943	4
794	Features959			13.579				647.044											7734196	7369038	7352515	10026007	4
795	Features960			13.58				475.236												3578241	3951615	4993014	3
796	Features961			13.582				402.009													3609638	4670179	2
797	Features962			13.583				281.108											3323702	3114147	3200482	4451751	4
798	Features963			13.583				298.229											2257713	2189022	2002291	2879788	4
799	Features964			13.585				518.131											1008791976	931129899	934238164	1328511195	4
800	Features965			13.585				238.05											8183975	7378108	7569891	10654822	4
801	Features966			13.589				465.178											2939402	2828037	2734350	3765564	4
802	Features967			13.592				146.057											1011691	853421	919614	1136257	4
803	Features968			13.63				322.177												85428			1
804	Features969			13.668				154.135											770649	292824	223502	235137	4
805	Features970			13.672				153.115												1458745			1
806	Features971			13.706				200.107													256083		1
807	Features972			13.706				146.049													114643	128982	2
808	Features973			13.708				274.217												75525		89017	2
809	Features974			13.715				250.052												210001	250882	232848	3
810	Features976			13.742				222.198											43119	53875	34658	38133	4
811	Features977			13.744				208.146											192915	186916	160718	153810	4
812	Features978			13.749				699.341											192915	186916	160718	153810	4
813	Features979			13.758				162.104	162.103											472143		505852	2
814	Features980			13.776				174.104												59276			1
815	Features981			13.785				150.14	150.14											4382578	4478153	3928227	3
816	Features982			13.8				206.203												1256367			1
817	Features983			13.816				222.161												261954		270863	2
818	Features984			13.859				220.246												346717	490409	400274	3
819	Features985			13.859				140.156											196807	229355	101701	156546	4
820	Features986			13.863				283.233												24845964	25962209		2
821	Features987			13.863				266.151											331144	346717	490409	400274	4
822	Features988			13.866				208.122												415866	310287	280424	3
823	Features989			13.87				810.312											127211	125712	159666	178100	4
824	Features990			13.886				314.224											258723	3210861	1116423	1941742	4
825	Features991			13.897				368.119												895578		872163	2
826	Features993			13.922				255.147														364609	1
827	Features994			13.928				256.146											3397967	4619377	3659038	4795196	4
828	Features995			13.933				128.12											127099	1630484	74776	618166	4
829	Features996			13.942				288.172											194707	206631	258513	238841	4
830	Features997			13.942				210.161											209114	39529	206497	131300	4
831	Features998			13.944				116.083											145004	248876	337951	197724	4
832	Features999			13.953				252.136											16020305	10347619	16125838	13100009	4
833	Features1000			13.953				236.152											1531757	1012722	1602783	1223838	4
834	Features1001			13.962				124.125											2670143	2109342	3406044	2260622	4
835	Features1002			14.012				236.177													3406044		1
836	Features1003			14.027				239.196											1163921	1482596	1462745	1463281	4
837	Features1004			14.027				168.114												1243491	1251260	1302675	3
838	Features1005			14.054				232.094												570560	737561		2
839	Features1006			14.09				255.029											250380	424480	349921	320607	4
840	Features1008			14.1				212.213												1445800	1191071		2
841	Features1009			14.11				268.149												341659	303967		2
842	Features1010			14.117				382.214											489999	576293	699094	462211	4
843	Features1011			14.119				172.125	172.124											765355		556872	2
844	Features1013			14.146				296.147												463553	516605		2
845	Features1014			14.155				100.052											263281	235207	166442	204424	4
846	Features1015			14.155				100.052											263281	235207	166442	204424	4
847	Features1016			14.189				112.125	112.124										3476452	4911815	5456402	4120958	4
848	Features1017			14.19				307.157											3476452	4911815		4120958	3
849	Features1018			14.207				194.167	194.166											704262			1
850	Features1019			14.207				180.114											397966	637102	307997	522144	4
851	Features1020			14.216				168.078	168.078											1573623			1
852	Features1021			14.241				222.125												586700			1
853	Features1022			14.245				220.182	220.181											26287657			1
854	Features1023			14.245				419.077												382494	353693		2
855	Features1024			14.251				228.126												488299	436543		2
856	Features1025			14.252				276.208														25221207	1
857	Features1026			14.252				222.161	222.161												229766		1
858	Features1027			14.265				292.24											337818	413050	566288	417084	4
859	Features1028			14.268				98.109												21659628		20894685	2
860	Features1029			14.29				318.039												659066	476283		2
861	Features1030			14.292				314.224												5025535	4128463	4269738	3
862	Features1031			14.296				280.146											529984	697956	630570	578346	4
863	Features1032			14.297				190.135	190.135											1723642			1
864	Features1033			14.301				284.201												1448904219	1219052902		2
865	Features1034			14.305				172.125												5334066	4232252	4606272	3
866	Features1035			14.306				164.083												4421522	3880094		2
867	Features1036			14.307				361.17												2747247		2487701	2
868	Features1037			14.31				266.247												3634262	2820773	2985900	3
869	Features1039			14.312				256.146											237510	241826	249671	147038	4
870	Features1040			14.312				206.167											280800		540421	583505	3
871	Features1041			14.335				276.172												272546	309174	308343	3
872	Features1042			14.353				398.209												259125	293220		2
873	Features1043			14.369				246.161											82448	280486	242926	135751	4
874	Features1044			14.369				348.375												18540096			1
875	Features1045			14.402				300.187												412330	401756	376590	3
876	Features1046			14.43				294.146												500184			1
877	Features1047			14.431				146.109												5996223	5208856	5456970	3
878	Features1048			14.431				271.133											331956	390718	342501	287452	4
879	Features1050			14.436				134.073												389109			1
880	Features1051			14.438				428.063												685274			1
881	Features1053			14.492				166.099	166.098											392515	218436	195341	3
882	Features1054			14.497				350.151											1373242	2088712	2041265		3
883	Features1056			14.526				512.143													355079	357473	2
884	Features1057			14.591				231.129												211604	195485	234360	3
885	Features1059			14.604				256.146											375638		507590	413194	3
886	Features1060			14.604				218.203												1229378	1020293	1047245	3
887	Features1061			14.609				204.187	204.187											5781991		5026098	2
888	Features1062			14.618				236.153												221452		235288	2
889	Features1063			14.625				264.136												269422	210228	203638	3
890	Features1064			14.629				214.193											286592	455725	438579	331632	4
891	Features1065			14.631				166.062	166.062												468356	463159	2
892	Features1066			14.653				345.037												564162	334059	482315	3
893	Features1067			14.66				250.135												4252529	3443169	3694057	3
894	Features1068			14.663				331.087													261140	241417	2
895	Features1069			14.67				249.136												82704			1
896	Features1070			14.696				310.139											80227	126910	146844	142187	4
897	Features1071			14.696				235.131											342917	349467	259649	307611	4
898	Features1072			14.703				473.066												357549			1
899	Features1073			14.705				301.251											80227	126910	146844	142187	4
900	Features1074			14.714				448.275												3514000			1
901	Features1076			14.748				252.136												167124	93882	104687	3
902	Features1077			14.753				320.219											62891	88495	73265		3
903	Features1078			14.757				275.224											123152	347919	256359	323022	4
904	Features1079			14.764				202.172	202.171										841888	1950320	1469568	2304734	4
905	Features1081			14.797				206.203	206.202										175287	194385	206724		3
906	Features1082			14.8				225.09											120345	264513	209650	196449	4
907	Features1083			14.82				213.172											260397	199250	92757	304736	4
908	Features1084			14.827				192.114											4720999	4077367	7186215	5085636	4
909	Features1085			14.827				286.12													307032	640259	2
910	Features1086			14.831				208.145												293297		382265	2
911	Features1087			14.836				248.177											149007	65384		316277	3
912	Features1088			14.838				507.118												297104		267918	2
913	Features1089			14.84				180.078	180.077										2050593		820805	2835572	3
914	Features1090			14.842				170.109	170.109											1131779			1
915	Features1092			14.896				174.143														313330	1
916	Features1093			14.901				258.165												933619		963064	2
917	Features1094			14.912				100.088											1166998	1934614	2457480	1307508	4
918	Features1096			14.915				447.171														1484105	1
919	Features1097			14.916				164.083												620899		657210	2
920	Features1098			14.919				200.156												620899		657210	2
921	Features1099			14.925				174.104												5080108	3512310	5954144	3
922	Features1101			14.957				220.125												26246			1
923	Features1102			14.964				160.088													82920		1
924	Features1103			14.968				246.234												3563561		4181440	2
925	Features1104			14.976				390.254													1470280		1
926	Features1105			14.982				157.089												436760	458369		2
927	Features1106			15.04				196.146													169183	199947	2
928	Features1107			15.04				216.151											220335	242833	218400	250887	4
929	Features1108			15.053				609.18												511294		403570	2
930	Features1109			15.058				343.174											137650	249060	112271	222311	4
931	Features1110			15.06				316.24												2153468			1
932	Features1111			15.069				244.24													887731		1
933	Features1112			15.076				288.193												1344914		999465	2
934	Features1113			15.101				246.174												828249	284327	507279	3
935	Features1114			15.11				184.125											872286	1109023	713059	1172908	4
936	Features1115			15.11				352.131											244831				1
937	Features1116			15.114				208.146												1100150		1173369	2
938	Features1117			15.125				276.072												249217			1
939	Features1118			15.127				328.167											254152	280204	368515	193391	4
940	Features1119			15.137				242.151											262279	263658	259979	271936	4
941	Features1120			15.148				456.224											262279	263658	259979	271936	4
942	Features1121			15.148				382.268												143026	155268	390867	3
943	Features1122			15.152				439.247												160569	138063	265040	3
944	Features1123			15.153				222.056												659068	663051	1267266	3
945	Features1124			15.154				481.155													306034		1
946	Features1125			15.159				285.06												386810	340609		2
947	Features1126			15.161				411.124											92728	143026	155268	390867	4
948	Features1127			15.161				384.157											49689	76976	43450	274363	4
949	Features1128			15.162				186.161													389304	358219	2
950	Features1129			15.164				250.102												401640	398170	719820	3
951	Features1130			15.166				532.183												674861		1305469	2
952	Features1131			15.168				262.193												389279	412500		2
953	Features1132			15.179				171.162												433819	523100	480483	3
954	Features1133			15.195				235.011												180695	179704	140338	3
955	Features1135			15.229				222.115													1399325		1
956	Features1136			15.233				174.14														486847	1
957	Features1137			15.242				234.198	234.197													4554284	1
958	Features1138			15.247				166.099	166.098											394810		476049	2
959	Features1139			15.249				477.131												394810		476049	2
960	Features1140			15.253				168.078											185215	654768	280321	359727	4
961	Features1141			15.285				482.048													241937	225813	2
962	Features1142			15.298				345.23											559068	721854	696640	649639	4
963	Features1144			15.316				254.203											468379		777777	685081	3
964	Features1146			15.345				268.037											92849	65650		133593	3
965	Features1147			15.348				329.031											1106777	92250	74238	71829	4
966	Features1148			15.35				293.987												809796	586935		2
967	Features1149			15.357				320.235												176108	186659	164378	3
968	Features1150			15.361				256.167												138620	142019	181398	3
969	Features1151			15.381				234.198												2531544	1386621		2
970	Features1152			15.386				221.214												1315004		681221	2
971	Features1153			15.388				264.136												431945			1
972	Features1154			15.392				174.089											2609512	6116632	6430856		3
973	Features1155			15.399				260.177											1190969	2086923	1662182	2077210	4
974	Features1156			15.401				138.14													1637059		1
975	Features1157			15.404				261.149												713864	223213	495272	3
976	Features1158			15.41				286.105											297027	333032	370525	432347	4
977	Features1159			15.414				282.067											297027	333032	370525	432347	4
978	Features1160			15.417				116.039	116.038										297027	333032	370525	432347	4
979	Features1164			15.467				404.256													404066		1
980	Features1165			15.507				192.162												245854	242572		2
981	Features1166			15.511				354.204												3047760	1744102		2
982	Features1167			15.516				204.06												247597		118304	2
983	Features1168			15.52				227.167												798638			1
984	Features1169			15.525				202.135												160520		142640	2
985	Features1170			15.529				190.099												1673468		1244014	2
986	Features1171			15.529				178.031											163678	161925	163846	189814	4
987	Features1172			15.534				280.135												636051	534516	508896	3
988	Features1173			15.534				110.073	110.072										161143		197382	171433	3
989	Features1174			15.54				278.151											1074981	1373886	1179857	1035395	4
990	Features1176			15.559				270.183												137415	144488	132216	3
991	Features1177			15.581				168.131												471484		404787	2
992	Features1178			15.597				178.062											196685	191539	233448	183020	4
993	Features1179			15.604				270.125												1207512	752368	687554	3
994	Features1180			15.617				358.133													2696856	2646560	2
995	Features1181			15.617				318.195												386920			1
996	Features1182			15.624				446.227												186920			1
997	Features1183			15.624				349.225												667133	781255	784539	3
998	Features1184			15.63				178.031													960826	864335	2
999	Features1185			15.637				194.13												667133	781255	784539	3
1000	Features1186			15.651				202.12												531772	468657	443816	3
1001	Features1187			15.655				392.221											271933	363910	322530	292815	4
1002	Features1188			15.655				236.177														1948991	1
1003	Features1189			15.66				178.11											1171912	1439535	1200736		3
1004	Features1190			15.669				220.182	220.181												131346	557263	2
1005	Features1191			15.696				310.168											1885060				1
1006	Features1192			15.696				208.073													313039		1
1007	Features1193			15.752				236.123												500278		949573	2
1008	Features1194			15.765				222.14												1039653	992215		2
1009	Features1195			15.772				236.141	236.14											180068		175202	2
1010	Features1196			15.779				314.162													646872		1
1011	Features1197			15.783				310.12											283680				1
1012	Features1198			15.797				161.008											319810		400605	284641	3
1013	Features1199			15.799				230.206												1052296			1
1014	Features1200			15.8				202.172	202.171											1052296		952620	2
1015	Features1201			15.804				272.188											542923	1052296	756851	952620	4
1016	Features1202			15.812				480.141											1670454		2076052	1714543	3
1017	Features1203			15.824				282.086											9590948	10923132	10266964	9084801	4
1018	Features1204			15.828				304.178											738524	1012756	945545	908114	4
1019	Features1205			15.832				402.204											3721188	3586410	4485055	4241869	4
1020	Features1206			15.835				382.062														214753	1
1021	Features1207			15.839				364.188											677897	987514	827257	1178997	4
1022	Features1210			15.882				124.088	124.088										208347	149740	161833	252719	4
1023	Features1211			15.884				166.099											274462	431264	308636	186124	4
1024	Features1212			15.898				234.183											516923		522952	387172	3
1025	Features1213			15.909				166.021											260243			374225	2
1026	Features1214			15.916				277.149											101029	116693		112909	3
1027	Features1215			15.931				268.178												158325	165457	140479	3
1028	Features1216			15.932				270.065											625126		467169	356534	3
1029	Features1217			15.943				302.199												590216			1
1030	Features1218			15.987				194.167												310132	300279		2
1031	Features1219			16.001				445.136														94890	1
1032	Features1220			16.006				682.198											163627		246657	320268	3
1033	Features1221			16.035				194.13											38285	212175	77341	173403	4
1034	Features1222			16.047				232.094												2442310	2281939		2
1035	Features1223			16.05				146.094												2442310	2281939		2
1036	Features1224			16.053				174.125											246289	304374	448343	202897	4
1037	Features1225			16.053				256.157												293786	286820	289817	3
1038	Features1226			16.054				186.092													767110		1
1039	Features1227			16.057				495.283											349376	331710	398664		3
1040	Features1228			16.062				218.105												293786	286820	289817	3
1041	Features1229			16.062				383.191											247312	276535	313685	291712	4
1042	Features1230			16.089				274.179											8799981	12209812	10234655	10310917	4
1043	Features1231			16.091				168.093	168.093											1112868		1163839	2
1044	Features1232			16.127				218.203	218.202										4718018	5526340	5977812	5015593	4
1045	Features1233			16.131				577.242											112941	158288		151021	3
1046	Features1234			16.154				240.136											5783246	7765336	7015471	3887536	4
1047	Features1235			16.167				385.979											549873	1018507	378849	422953	4
1048	Features1236			16.172				256.167											444619	485827	505078	414532	4
1049	Features1237			16.172				372.23													250797	279024	2
1050	Features1238			16.172				243.125												118547	101792	103473	3
1051	Features1239			16.189				183.104												501494			1
1052	Features1240			16.203				230.094													496587		1
1053	Features1241			16.205				162.104														366554	1
1054	Features1242			16.209				242.094												677232		603994	2
1055	Features1243			16.21				292.167														16304578	1
1056	Features1245			16.23				299.209											262347		315202	396179	3
1057	Features1246			16.277				238.156												424699			1
1058	Features1247			16.282				197.214											291100	246675	193858	240489	4
1059	Features1248			16.283				276.208											262347	398836	315202	396179	4
1060	Features1249			16.295				438.266												911092			1
1061	Features1250			16.302				201.151												835497		643964	2
1062	Features1251			16.312				161.12													1326634		1
1063	Features1252			16.344				394.156												1558379		1425442	2
1064	Features1253			16.347				348.107												524194	312972	446355	3
1065	Features1254			16.353				269.152												336403	147698	352571	3
1066	Features1255			16.358				273.172												1558379		1425442	2
1067	Features1256			16.358				278.151												138986886	53810240	129711057	3
1068	Features1257			16.367				236.156											200038	264567	319432	191437	4
1069	Features1258			16.371				233.141												3429740			1
1070	Features1260			16.421				202.121												242438	239495		2
1071	Features1261			16.432				226.135													670222		1
1072	Features1262			16.437				293.056												11888346	22010733	13622820	3
1073	Features1263			16.44				263.007													989303	646615	2
1074	Features1264			16.441				355.126													433661	286272	2
1075	Features1265			16.441				342.143											286218	310555	615553	392020	4
1076	Features1266			16.441				493.178											85044	110302	176370	112525	4
1077	Features1267			16.443				308.13													172986	137560	2
1078	Features1268			16.449				368.121													533476		1
1079	Features1269			16.45				304.088													702739	456986	2
1080	Features1270			16.45				280.24												313856	313109		2
1081	Features1271			16.452				312.172											47066	42303	113559	54778	4
1082	Features1272			16.452				166.135												1090964	533476	1081934	3
1083	Features1273			16.455				240.114													1226753	2710959	2
1084	Features1274			16.461				314.136												5718006	3241728	4874986	3
1085	Features1275			16.461				372.157												1090964	533476		2
1086	Features1276			16.466				329.123											325714	324153	412856	349755	4
1087	Features1277			16.477				341.196											1246490	1300988	1311153	1195561	4
1088	Features1278			16.495				244.182	244.181											646545			1
1089	Features1279			16.522				276.136											585658	868636	854530	608627	4
1090	Features1280			16.549				298.214												552815			1
1091	Features1281			16.567				229.11												413741			1
1092	Features1283			16.595				146.094											441993	476893	622967	511703	4
1093	Features1284			16.612				270.183												236702	241673		2
1094	Features1285			16.616				90.0311													209474		1
1095	Features1286			16.623				234.136												477272	440414	337409	3
1096	Features1287			16.625				221.116												119072	112305		2
1097	Features1288			16.63				306.146												448271			1
1098	Features1289			16.632				350.166												463308	493512	352558	3
1099	Features1290			16.634				193.071	193.07											649476	687600	501866	3
1100	Features1291			16.635				274.042													209474		1
1101	Features1292			16.657				375.168											189900	204335	281857	312949	4
1102	Features1293			16.693				232.219	232.218												137066		1
1103	Features1294			16.699				208.146												886812		241829	2
1104	Features1295			16.704				414.131												886812	846076	241829	3
1105	Features1296			16.708				390.24											1530332	1699111	1490752	1803094	4
1106	Features1297			16.713				248.177											93594	886812		241829	3
1107	Features1298			16.717				180.114											8744883	12299440	578308	1976324	4
1108	Features1299			16.761				325.167											18541104	13142077	15158995	21385722	4
1109	Features1300			16.761				156.114											435893	636908	943122	1202237	4
1110	Features1301			16.762				359.122											8867454	7157898	6896603	10205504	4
1111	Features1302			16.762				445.119											15912660	11100687	12871049	16504969	4
1112	Features1303			16.764				815.278											19081233	14694500	16967419	23019783	4
1113	Features1304			16.767				436.049											15912660	11100687	12871049	16504969	4
1114	Features1305			16.769				252.11											2919799	1337494	1644377	3425776	4
1115	Features1306			16.771				592.15											561216718	434422392	470948153	651557209	4
1116	Features1307			16.773				326.195											4865369	4563396	6107542	8470672	4
1117	Features1308			16.807				214.12											21959971				1
1118	Features1309			16.814				198.075												26789744	14836939		2
1119	Features1310			16.877				229.146											235218475				1
1120	Features1311			16.877				320.054											26391		88852	95828	3
1121	Features1312			16.879				236.177													262146		1
1122	Features1313			16.883				286.033											21248	22594	139057	118240	4
1123	Features1314			16.89				216.024													262146		1
1124	Features1315			16.899				340.105												125864	99989	111114	3
1125	Features1316			16.902				196.125	196.124										219176		2777361		2
1126	Features1317			16.906				114.104											21003620	23183964	18407094	21705257	4
1127	Features1318			16.913				330.101											537238	626365	643555	624818	4
1128	Features1319			16.916				356.262											661693	797110	934205	859569	4
1129	Features1320			16.917				266.13											626860	729413	805428	781852	4
1130	Features1321			16.922				382.189											1061865	1103351	1194770	1202773	4
1131	Features1322			16.924				120.093	120.093												1224805		1
1132	Features1324			17.056																395026		295384	2
1133	Features1326			17.101				367.168												28795		27193	2
1134	Features1327			17.108				399.068											9771815	17084943	6765095	6963752	4
1135	Features1328			17.135				292.021													739206		1
1136	Features1329			17.137				382.158												466729	492925		2
1137	Features1330			17.139				828.038												295993	238918		2
1138	Features1331			17.146				291.129												1065747	1132671		2
1139	Features1332			17.15				194.13												266291		220008	2
1140	Features1333			17.151				267.15												194965		127074	2
1141	Features1334			17.155				234.198												4491676		3526083	2
1142	Features1335			17.155				178.135												194965		127074	2
1143	Features1336			17.166				208.109												4165402		4143785	2
1144	Features1337			17.187				236.141											370907	400541	196212	198294	4
1145	Features1338			17.229				407.15													1127699		1
1146	Features1339			17.234				518.017													353230		1
1147	Features1340			17.234				140.12													1127699		1
1148	Features1341			17.236				194.109													353230		1
1149	Features1342			17.25				316.24														117152	1
1150	Features1343			17.291				218.13												918877			1
1151	Features1344			17.292				530.178												278069		259214	2
1152	Features1345			17.297				234.161												16170889	6180126	14740470	3
1153	Features1346			17.301				256.146											318641	711026	359993	673644	4
1154	Features1347			17.324				164.083	164.083											4381001	2655486	3311963	3
1155	Features1348			17.329				279.158														579372	1
1156	Features1349			17.33				331.067												389484	233682	310005	3
1157	Features1350			17.333				368.119												8043071	1543554	4325889	3
1158	Features1351			17.339				250.106	250.107													5018786	1
1159	Features1352			17.368				300.208												309001	200072	206263	3
1160	Features1353			17.371				224.141											2099347	1848039	1189412	1312155	4
1161	Features1354			17.384				164.083											483804	492669	487293	423530	4
1162	Features1356			17.4				444.178											270955	402704	493258		3
1163	Features1357			17.452				299.995											826765	959667	747588	1203629	4
1164	Features1358			17.496				170.203											1455085	2240687	1696491	1587810	4
1165	Features1359			17.535				214.156												271783	292909	173856	3
1166	Features1360			17.558				184.073												724653			1
1167	Features1361			17.582				246.161													4212562		1
1168	Features1363			17.593				133.089											480283	575645	554818	489888	4
1169	Features1364			17.609				99.0679	99.0676													77280	1
1170	Features1365			17.611				146.109	146.109													301196	1
1171	Features1366			17.681				440.292													512509	347475	2
1172	Features1367			17.687				160.109											17307039	13892270	9791441		3
1173	Features1368			17.714				213.151	213.151											176858		167615	2
1174	Features1369			17.737				305.199												580981		529800	2
1175	Features1370			17.741				134.073														243498	1
1176	Features1371			17.758				340.072													216189		1
1177	Features1372			17.777				358.098												425880		404041	2
1178	Features1373			17.836				359.155											1741199	1765883	1227870	1931667	4
1179	Features1374			17.845				250.156											7964950				1
1180	Features1375			17.884				270.138											273156	330542	376184		3
1181	Features1376			17.894				143.058													2039729	1747651	2
1182	Features1377			17.912				217.11											188406	209062	261241	138225	4
1183	Features1378			17.925				168.187												4582118			1
1184	Features1379			17.925				292.203												912548	780255		2
1185	Features1380			18.076				459.146													1363068	1091061	2
1186	Features1381			18.086				994.077														889055	1
1187	Features1382			18.087				333.137														2075084	1
1188	Features1383			18.087				481.17														1244890	1
1189	Features1384			18.088				466.22														2902945	1
1190	Features1385			18.089				371.078														1580066	1
1191	Features1386			18.091				281.141														710996	1
1192	Features1387			18.094				100.052														2020753	1
1193	Features1388			18.095				516.229														1250908	1
1194	Features1389			18.096				128.156														46158122	1
1195	Features1390			18.128				287.964											715873	812864		712536	3
1196	Features1391			18.134				238.156												1822587	389999	1978378	3
1197	Features1392			18.143				251.079												603436	558058		2
1198	Features1393			18.148				307.091											485090	308426		301624	3
1199	Features1394			18.152				270.089											649968	607352	594683	466303	4
1200	Features1395			18.156				212.177												2369497		3143997	2
1201	Features1397			18.17				154.135												10178593	12404034		2
1202	Features1398			18.179				360.251											507631	607882	515137	516015	4
1203	Features1399			18.181				158.061											405759	648764	949535	691558	4
1204	Features1400			18.193				351.121											350484	352775	361325		3
1205	Features1401			18.211				339.159												425034	408656	443286	3
1206	Features1402			18.219				351.967											97329	2848151	394155	1490835	4
1207	Features1403			18.226				206.057												1458823		1898228	2
1208	Features1404			18.253				210.14	210.14										728982	658992	808005	799391	4
1209	Features1405			18.258				284.198												489715		477045	2
1210	Features1406			18.278				222.161	222.161										2372033	3557171	2558042	3081994	4
1211	Features1407			18.312				244.124											305945	443383	294829	270773	4
1212	Features1408			18.318				378.11														4923636	1
1213	Features1409			18.319				168.187												5708490			1
1214	Features1411			18.413				498.269											226540	190028	151634		3
1215	Features1412			18.419				340.334											2657884	2544808	2282234		3
1216	Features1413			18.419				422.072											320488		322200		2
1217	Features1414			18.451				210.125	210.125										2239283	2968448	3024682	2551666	4
1218	Features1415			18.458				359.076											106357	49199	186382	171271	4
1219	Features1416			18.46				271.097												185933			1
1220	Features1417			18.471				402.167											838210	953605		989324	3
1221	Features1418			18.487				245.141												281433	295988	320979	3
1222	Features1419			18.529				452.143												5488655			1
1223	Features1421			18.662				328.109													568488		1
1224	Features1422			18.664				295.099												669532			1
1225	Features1423			18.665				226.193												669532			1
1226	Features1424			18.666				249.049												1501485			1
1227	Features1425			18.711				100.088														8769050	1
1228	Features1426			18.72				210.161											1647672		1498866	1519844	3
1229	Features1427			18.729				375.129											17341	474814	95718	352218	4
1230	Features1428			18.736				138.068	138.067										1135492	843339	878820	730355	4
1231	Features1429			18.762				298.133											889773				1
1232	Features1430			18.779				551.085												3270545		3186347	2
1233	Features1431			18.788				178.135												3279126	1129493	3103135	3
1234	Features1432			18.797				230.167														1739802	1
1235	Features1433			18.808				238.099											264004		222380	2007804	3
1236	Features1434			18.813				222.234												793389		817312	2
1237	Features1436			18.821				305.163												3043835		3018686	2
1238	Features1437			18.83				300.151											187612	343053		401278	3
1239	Features1438			18.85				112.125	112.124										289474	586252	584286	351676	4
1240	Features1439			18.863				284.141												4368980		3040520	2
1241	Features1440			18.886				278.188											386425	2030136	400240	1082985	4
1242	Features1441			18.891				262.193												1841948	1089793	1077881	3
1243	Features1442			18.895				234.161												19751461		15859377	2
1244	Features1443			18.902				146.13												546783		373050	2
1245	Features1444			18.904				172.146												702980			1
1246	Features1445			18.928				244.182												1338650			1
1247	Features1446			18.929				420.037														739633	1
1248	Features1447			18.931				210.161														3414688	1
1249	Features1448			18.932				259.193												3288447		1716502	2
1250	Features1449			18.933				312.088												1338650			1
1251	Features1450			18.938				286.156												488605		537487	2
1252	Features1451			18.938				260.071	260.072											8681227		8236574	2
1253	Features1452			18.996				230.115													1504802		1
1254	Features1453			18.996				474.21													5688300		1
1255	Features1454			18.999				234.161	234.161												848397099		1
1256	Features1455			18.999				208.073													10583820		1
1257	Features1456			19.005				152.12												7781144			1
1258	Features1458			19.007				241.085													8156756		1
1259	Features1459			19.008				216.172													2923037		1
1260	Features1460			19.01				200.141												2429540			1
1261	Features1461			19.01				270.146													9017190		1
1262	Features1462			19.012				184.109												6167050			1
1263	Features1463			19.021				174.089												4907619			1
1264	Features1465			19.066				194.049												5126856	2730874	6268074	3
1265	Features1467			19.133				154.099												169998	174375		2
1266	Features1468			19.138				268.312												169998	174375		2
1267	Features1469			19.144				112.125	112.124											5626622			1
1268	Features1470			19.223				254.203											77222	126027	83626	151414	4
1269	Features1471			19.259				300.055											204636	243168		223030	3
1270	Features1472			19.261				202.12											3275	160156	152838	11242	4
1271	Features1473			19.266				408.178											831464	1201374	1022456	851442	4
1272	Features1474			19.282				278.151														107222	1
1273	Features1475			19.344				320.155												2268161	1420520		2
1274	Features1477			19.367				228.136														465718	1
1275	Features1478			19.376				268.089														57186	1
1276	Features1479			19.38				130.078											2009512		1240735	1633238	3
1277	Features1480			19.387				472.246												112524		1633238	2
1278	Features1481			19.432				358.131											2741042	2216115			2
1279	Features1482			19.452				234.125											1113969	1784770	2231812	862727	4
1280	Features1484			19.513				194.109	194.108										2851931	3257007	3208389	2598851	4
1281	Features1485			19.529				445.066														877112	1
1282	Features1486			19.549				220.182	220.181										315621	343034	555090	425371	4
1283	Features1487			19.558				368.084													160243		1
1284	Features1490			19.603				331.236														113328	1
1285	Features1492			19.614				146.13												22120154			1
1286	Features1493			19.625				330.222												2130036			1
1287	Features1494			19.633				328.142												1690140	1032212		2
1288	Features1495			19.654				144.078											387731	505955		338595	3
1289	Features1496			19.665				202.12											129167	395410	152671	208907	4
1290	Features1497			19.668				360.157											423800	469798			2
1291	Features1498			19.672				210.125											315425	278616	311035	148637	4
1292	Features1499			19.695				219.137	219.137												845011		1
1293	Features1500			19.696				234.161	234.161												845011		1
1294	Features1501			19.697				242.178														95820	1
1295	Features1503			19.735				306.048											88905	2832369	446124	1079471	4
1296	Features1504			19.746				376.131											1701802	2124120	1593639	3498036	4
1297	Features1505			19.762				246.234	246.234										171074	351842	147906	341755	4
1298	Features1506			19.789				205.11												293861	300882		2
1299	Features1507			19.818				287.119												391978	395199		2
1300	Features1508			19.832				363.217												1931413		1573421	2
1301	Features1509			19.879				200.131											13476641	15338476	12843593	11232882	4
1302	Features1510			19.917				315.24														302261	1
1303	Features1511			19.955				399.186											311627	2912144	590534	1466870	4
1304	Features1512			19.971				332.198												1502662			1
1305	Features1513			20.029				314.126											1656099	1922681	1863486	1494796	4
1306	Features1514			20.103				357.093													787788		1
1307	Features1515			20.106				286.135													5789473		1
1308	Features1516			20.11				351.132											779349	668041	1738504		3
1309	Features1517			20.139				237.172													263188		1
1310	Features1518			20.187				200.177											6167049	2577076			2
1311	Features1519			20.189				238.135											847735		981570	742999	3
1312	Features1520			20.211				268.105														426399	1
1313	Features1521			20.234				312.093											84177	281955	222453	157743	4
1314	Features1522			20.238				224.156	224.155											631169			1
1315	Features1523			20.24				172.125												631169			1
1316	Features1524			20.255				328.08												1261279			1
1317	Features1525			20.256				311.989											108602	229387	197300	74971	4
1318	Features1526			20.263				154.135											3662173	2429054	2882701	1760728	4
1319	Features1527			20.263				384.215												14593	16651	94313	3
1320	Features1529			20.27				426.37											3662173		2882701	1760728	3
1321	Features1530			20.272				254.188												2429054	2882701	1760728	3
1322	Features1531			20.287				246.161	246.161										108602	229387	197300	74971	4
1323	Features1533			20.308				129.057													1552167		1
1324	Features1534			20.317				425.267												1263599			1
1325	Features1535			20.328				272.104											75715	180212	783087	474003	4
1326	Features1536			20.364				364.146												717613			1
1327	Features1537			20.391				201.136												621631			1
1328	Features1538			20.394				195.162												621631			1
1329	Features1539			20.395				193.146												621631			1
1330	Features1540			20.404				361.096											770856			866133	2
1331	Features1541			20.406				415.166												843168			1
1332	Features1542			20.409				194.049													1031752		1
1333	Features1543			20.413				368.083												335930			1
1334	Features1547			20.445				199.193											260534	489591	216804		3
1335	Features1548			20.447				450.217												1216345	395459		2
1336	Features1549			20.537				142.135											34872		62802	50337	3
1337	Features1550			20.546				170.094												3566808		2120668	2
1338	Features1551			20.585				294.138														1532346	1
1339	Features1552			20.6				371.15												774127	262305	702544	3
1340	Features1553			20.638				281.087												652183	320444	709317	3
1341	Features1554			20.64				180.093												1283444		1747720	2
1342	Features1555			20.642				397.981												839623	388949	969460	3
1343	Features1556			20.645				445.347												839623	388949	969460	3
1344	Features1557			20.65				324.172											1590449	1985805	1849945	1442946	4
1345	Features1558			20.651				388.074												4657451	2380599	5209701	3
1346	Features1559			20.651				292.167											1384432	1705962	1711843	1231524	4
1347	Features1560			20.683				116.062														443801	1
1348	Features1562			20.721				273.063											128452	83857	152835	43530	4
1349	Features1563			20.748				384.145														55095466	1
1350	Features1565			20.751				350.214														11855439	1
1351	Features1566			20.755				416.205														3081894	1
1352	Features1567			20.776				226.266												440233	460955		2
1353	Features1568			20.82				109.968	109.968												272480		1
1354	Features1569			20.822				198.111												592921		900160	2
1355	Features1570			20.87				378.08												591740			1
1356	Features1571			20.878				204.151												3030793		4228386	2
1357	Features1572			20.878				292.203												295806	183450	159427	3
1358	Features1573			20.887				425.075												4581051	2968964	2919674	3
1359	Features1574			20.912				292.167												435514	110345	215373	3
1360	Features1575			20.941				492.298											110167	299492	196095	330491	4
1361	Features1577			20.986				351.083											291905	2407404	966805	1578189	4
1362	Features1578			20.986				339.252											90403	899858	368128	577272	4
1363	Features1579			21.019				130.062											848870	1121762	921037	749188	4
1364	Features1580			21.154				198.125													583621		1
1365	Features1581			21.157				278.151											7204685			6092679	2
1366	Features1582			21.17				236.177											2717517	1484168	576483	1498413	4
1367	Features1583			21.174				146.057											686012	677933		1273668	3
1368	Features1584			21.181				164.083											253557			386296	2
1369	Features1585			21.255				314.227												1075891	290599	1196932	3
1370	Features1586			21.258				286.214											241392	299225		185431	3
1371	Features1587			21.293				361.188											263733	324790	265565		3
1372	Features1588			21.298				337.152											8371812	9429927	11210502		3
1373	Features1589			21.401				244.167											373226	669652	652281	633666	4
1374	Features1590			21.401				446.133											1291947	1791435	1242533	1022072	4
1375	Features1591			21.406				208.109												620585	429025	315303	3
1376	Features1592			21.406				306.183											772342	1150016	826619	911270	4
1377	Features1593			21.41				456.087												1782179	648707	554068	3
1378	Features1594			21.412				268.061												2134200	1486728	922741	3
1379	Features1595			21.455				442.141											939398	893046			2
1380	Features1597			21.462				357.176											43714	89775	92566	84062	4
1381	Features1599			21.541				198.234													127533	152768	2
1382	Features1600			21.543				240.208											1315472	2360252	1343541	1462416	4
1383	Features1601			21.691				179.094	179.094											353107		452086	2
1384	Features1602			21.74				112.125	112.124											11253810	8995480		2
1385	Features1603			21.751				70.0777	70.0776											11253810	8995480		2
1386	Features1604			21.8				242.199												572602			1
1387	Features1605			21.805				306.219												1566447			1
1388	Features1606			21.871				128.083											2522428				1
1389	Features1607			21.877				362.391											7945810				1
1390	Features1608			21.88				340.334											387739363	81588384			2
1391	Features1609			21.882				544.267											2187097		2202900		2
1392	Features1611			21.963				326.256												246427	534571		2
1393	Features1612			22.025				128.083												15624310			1
1394	Features1613			22.064				324.266													1548531		1
1395	Features1614			22.088				239.13												198142	95861	201606	3
1396	Features1615			22.088				226.193											477511	484920	470250	445027	4
1397	Features1616			22.131				660.329												1594215	774756	1195734	3
1398	Features1617			22.152				226.156											1056396	1644281	1433972	1337108	4
1399	Features1618			22.179				248.177												3339109	3394757		2
1400	Features1619			22.194				311.136												654979	555571	409814	3
1401	Features1620			22.194				272.25												1250403	1087986	762311	3
1402	Features1621			22.194				340.178											337727	812383	607677	445859	4
1403	Features1622			22.196				702.033												706524	629763		2
1404	Features1623			22.198				381.172													801427		1
1405	Features1624			22.201				441.136												218333049	193411319		2
1406	Features1625			22.203				340.145												1855644	1504021		2
1407	Features1626			22.204				268.121													859824		1
1408	Features1627			22.207				558.136												1873300	1547121		2
1409	Features1628			22.219				320.228											10380	592280	119709	779881	4
1410	Features1629			22.302				196.146											754602	896815	453902		3
1411	Features1630			22.311				322.25												708725			1
1412	Features1632			22.358				325.898											3854785	3336648			2
1413	Features1633			22.407				225.151	225.15											1074108	951686	854087	3
1414	Features1634			22.413				380.173												1294904	941183	906998	3
1415	Features1635			22.414				433.174												1656444	1225026		2
1416	Features1636			22.423				222.125												5301471		4007295	2
1417	Features1637			22.425				282.234											2712479	9333489	5189297	10248943	4
1418	Features1638			22.427				176.083												2966672		3361323	2
1419	Features1639			22.427				511.067												1137612	514201	1274320	3
1420	Features1640			22.428				200.213												989970	583560	1093452	3
1421	Features1641			22.429				188.152												754772	392895	932324	3
1422	Features1642			22.43				444.091												2058362	1008319	2290105	3
1423	Features1643			22.434				496.1												19034894	9476062	21668185	3
1424	Features1644			22.45				392.202												917527			1
1425	Features1645			22.454				70.0777	70.0775												29018954		1
1426	Features1646			22.46				196.146												1811393			1
1427	Features1647			22.517				163.048											639634	205420	564901	559178	4
1428	Features1648			22.522				236.104											2693588	3397767	2562089	3148170	4
1429	Features1649			22.522				222.198											816851	874437	656069		3
1430	Features1650			22.526				248.127												1819363		1705231	2
1431	Features1651			22.531				320.125											5841226	7656089		6728273	3
1432	Features1652			22.533				280.203											345261	551729		460635	3
1433	Features1653			22.56				174.125														9063949	1
1434	Features1655			22.582				333.168											102899	314913		742234	3
1435	Features1656			22.665				301.153												4309894			1
1436	Features1657			22.671				279.104												667657			1
1437	Features1658			22.731				200.12											2838443		3393765		2
1438	Features1659			22.787				144.078												3465671		2654509	2
1439	Features1660			22.802				610.302											592905	756783	606090	537899	4
1440	Features1661			22.894				244.182	244.181													10522197	1
1441	Features1662			22.897				254.13														831215	1
1442	Features1663			22.91				278.09											1243159		824470		2
1443	Features1664			22.926				304.225												9726888	2736825		2
1444	Features1665			22.942				211.136											1331989	2623817	350671		3
1445	Features1666			22.959				312.172												4453288		3772082	2
1446	Features1667			22.994				232.131												556270	356013		2
1447	Features1668			23.054				367.195												2219222	1793988		2
1448	Features1669			23.061				400.203												555844	457320		2
1449	Features1670			23.137				190.146											1447389	1406666	1293257	1272466	4
1450	Features1671			23.14				246.198											1447389	1406666	1293257	1272466	4
1451	Features1672			23.141				236.177											8554676	9324498	6687080	9108976	4
1452	Features1673			23.141				148.125											1447389	1406666	1293257	1272466	4
1453	Features1674			23.141				154.099											1155094	1101048	1921087	932141	4
1454	Features1675			23.148				234.161											1466712	1673727	1086674	1573088	4
1455	Features1676			23.149				344.083											8204616	8404413	6572408	8653163	4
1456	Features1678			23.15				228.089											1299719	1335573	974252	1459260	4
1457	Features1679			23.15				492.171											1299719	1335573	974252	1459260	4
1458	Features1680			23.152				218.115											2877581	3378768	2255049	3168104	4
1459	Features1681			23.153				176.12											4790825	4592325	5151797	5778562	4
1460	Features1682			23.155				256.088											1299719	1335573	974252	1459260	4
1461	Features1683			23.164				294.11														1756446	1
1462	Features1684			23.279				338.172											3285353	2642251	2986050	2009630	4
1463	Features1685			23.283				238.193											699276				1
1464	Features1686			23.294				278.092											27709	7365220	550692	2511426	4
1465	Features1687			23.304				252.151											2598829				1
1466	Features1689			23.412				196.146														475386	1
1467	Features1691			23.487				184.146											1723957		692441		2
1468	Features1692			23.492				302.224											2711207				1
1469	Features1693			23.494				242.094											1392743				1
1470	Features1694			23.505				227.167													15407642	12975191	2
1471	Features1695			23.51				166.172											1943676				1
1472	Features1696			23.678				199.11	199.111													870882	1
1473	Features1697			23.781				689.429													4842014		1
1474	Features1698			23.784				386.136													874408		1
1475	Features1699			23.786				450.236													1900210		1
1476	Features1700			23.995				274.156													1178755		1
1477	Features1701			24.044				292.228													1743572		1
1478	Features1702			24.183				380.256											514159	255886	248404	349260	4
1479	Features1703			24.186				332.235											631006	854458	538823	661196	4
1480	Features1704			24.215				226.156											996392	1181450	1023559		3
1481	Features1705			24.266				714.409													386651		1
1482	Features1707			24.413				372.193											2461721				1
1483	Features1708			24.439				1035.96												1989150		1694377	2
1484	Features1709			24.446				318.183												1989150		1694377	2
1485	Features1710			24.453				322.142											3496990	6067921	4803502	3161645	4
1486	Features1711			24.481				344.198														2140685	1
1487	Features1712			24.484				258.198	258.197													3695937	1
1488	Features1713			24.492				342.121												4969659			1
1489	Features1714			24.543				472.24													1708295		1
1490	Features1715			24.554				284.154											2983615	2503951	2015327	949215	4
1491	Features1716			24.579				358.135											294303	276016	294199	279565	4
1492	Features1717			24.63				140.083											710529	605860	533890	425171	4
1493	Features1718			24.632				184.182											1042876	1907964	1459626		3
1494	Features1719			24.635				226.084											3340070				1
1495	Features1720			24.638				152.12											3340070				1
1496	Features1721			24.639				206.13											1556614		1087425	1316332	3
1497	Features1722			24.639				236.177											3340070				1
1498	Features1723			24.642				158.109	158.108										1297934				1
1499	Features1724			24.666				82.0777	82.0775										535379	572610		583947	3
1500	Features1725			24.67				140.12													707261		1
1501	Features1726			24.673				604.688											2913433	4355226	3684099	4173290	4
1502	Features1728			24.854				416.219											71690	508762		263562	3
1503	Features1729			25.031				431.351											5511332	2100507		1936234	3
1504	Features1730			25.032				164.12												7970813			1
1505	Features1731			25.034				230.188											34305987	12177354	11354322		3
1506	Features1732			25.041				234.161												2295387	149619	2098811	3
1507	Features1733			25.043				248.177												334039			1
1508	Features1734			25.115				210.198												1443768	1117942	1373985	3
1509	Features1735			25.126				270.234												523273	501197		2
1510	Features1737			25.355				338.176													274051		1
1511	Features1738			25.393				383.081														1871840	1
1512	Features1739			25.417				410.412												2046476			1
1513	Features1740			25.418				312.339												20997577			1
1514	Features1742			25.421				296.307												4385834			1
1515	Features1743			25.421				174.161												1629622		1024791	2
1516	Features1744			25.422				116.12												10927163			1
1517	Features1745			25.423				228.136												1245726			1
1518	Features1746			25.497				308.162											3637812	5794340	7101109	3665695	4
1519	Features1747			25.506				302.188											2846089	3154917			2
1520	Features1748			25.519				234.198											1405649				1
1521	Features1749			25.522				180.114											1405649				1
1522	Features1750			25.522				128.083											1405649				1
1523	Features1751			25.523				126.104											6118278	6731700	10319712		3
1524	Features1752			25.524				214.135														1631256	1
1525	Features1753			25.526				164.12	164.119													624269	1
1526	Features1754			25.528				152.083											5141619	8691985	8172990	8370081	4
1527	Features1755			25.537				240.208												2948678	3070868		2
1528	Features1756			25.537				314.245												35036363	31188800		2
1529	Features1757			25.542				308.119														137400	1
1530	Features1758			25.551				130.099												2418635			1
1531	Features1759			25.551				270.161												1189661			1
1532	Features1760			25.555				242.224												14706185			1
1533	Features1761			25.557				130.062												5004576			1
1534	Features1762			25.602				96.0934	96.0931												1749152		1
1535	Features1763			25.746				171.162												9335714		6341756	2
1536	Features1764			25.746				171.162												9335714		6341756	2
1537	Features1765			25.748				160.146												4046724		2776906	2
1538	Features1766			25.793				112.125	112.124										2649714	4658900	5192342	3642963	4
1539	Features1767			25.838				258.11												1458638	1022910	712242	3
1540	Features1768			25.874				574.358												617943	1053243	590841	3
1541	Features1769			25.883				184.1												345484	283879		2
1542	Features1770			25.982				200.156												1505134			1
1543	Features1771			25.983				320.198												1012489			1
1544	Features1772			25.989				204.187												2033645			1
1545	Features1773			25.993				248.141												2453615	2486706		2
1546	Features1774			26.164				114.104												2263351	2129216		2
1547	Features1775			26.165				424.427												2287661	1769016		2
1548	Features1776			26.237				222.234												1401826			1
1549	Features1777			26.24				220.182												1401826			1
1550	Features1778			26.245				340.188												1401826			1
1551	Features1779			26.247				114.14												12376716			1
1552	Features1780			26.296				171.125												7563772			1
1553	Features1781			26.336				124.125													8478464		1
1554	Features1782			26.386				192.187	192.187											4022777	3908781	3930976	3
1555	Features1783			26.393				418.253												2521325			1
1556	Features1784			26.422				208.182											1875989	1919022	1942491		3
1557	Features1785			26.456				436.18												7759051			1
1558	Features1786			26.459				150.104												4074192	3801595		2
1559	Features1787			26.462				178.062											520171	1662597	1199249	1190077	4
1560	Features1788			26.462				193.183												3561470		3616312	2
1561	Features1789			26.525				157.073												1329678		1039457	2
1562	Features1790			26.534				262.193													8168269	7726415	2
1563	Features1791			26.678				182.094											1169018	2057421	755378	797884	4
1564	Features1792			26.689				228.172											32048823	30541230			2
1565	Features1793			26.732				236.177														693545	1
1566	Features1794			26.776				224.152												1009127		988094	2
1567	Features1795			26.777				232.219												1531012		1570297	2
1568	Features1796			26.781				202.099												2451674		2617558	2
1569	Features1797			26.781				264.136											766199	931095		1030198	3
1570	Features1798			26.784				400.152												2451674		2617558	2
1571	Features1799			26.785				443.118														2085211	1
1572	Features1800			26.786				265.121	265.121													2963758	1
1573	Features1801			26.788				251.105	251.106											1202452	1191821	1382095	3
1574	Features1802			26.821				336.197												468689			1
1575	Features1803			26.838				166.099	166.098										1720361	1486232	1709292		3
1576	Features1804			26.905				195.089											6040379	11289343		9236930	3
1577	Features1805			26.934				214.156											1258256	1383314			2
1578	Features1806			26.938				210.125												616055			1
1579	Features1807			27.115				366.115														1542833	1
1580	Features1808			27.208				222.125												1828208	1792284		2
1581	Features1809			27.215				224.104												1601781			1
1582	Features1811			27.331				270.255											1115225	1123279	1271945		3
1583	Features1812			27.414				182.167												695232			1
1584	Features1813			27.417				210.125											445644		435355		2
1585	Features1814			27.448				260.195												11426997			1
1586	Features1815			27.456				262.193											2581244				1
1587	Features1816			27.538				236.177														1630507	1
1588	Features1817			27.567				450.125												2159119	573563	1300863	3
1589	Features1818			27.572				167.167												3652888	4721549	5692139	3
1590	Features1819			27.572				96.0934											1317927	1545454	2017161		3
1591	Features1820			27.574				171.17											12425490	14388989	18363979	20858805	4
1592	Features1821			27.578				286.193											2057037	2195433	3283672	3565548	4
1593	Features1822			27.581				604.688											150766947	168016646	223029242	256265711	4
1594	Features1823			27.581				503.133											446204		572771	519427	3
1595	Features1824			27.933				312.302											2394323	441535		196904	3
1596	Features1825			27.96				218.13	218.13													47786465	1
1597	Features1826			28.01				232.164											4750987	9315449	6655858	7660500	4
1598	Features1827			28.102				154.099											2751112	3281565	1886634	1788684	4
1599	Features1828			28.145				198.161											5231864	6832028		4320534	3
1600	Features1829			28.176				114.068	114.067										3736123	2821440			2
1601	Features1830			28.185				206.167											2051646	1808011			2
1602	Features1831			28.201				488.073	488.075										630782		2230499	1385807	3
1603	Features1832			28.281				136.088	136.088													1410685	1
1604	Features1833			28.298				312.302												1915327			1
1605	Features1834			28.301				196.146												32306800			1
1606	Features1835			28.308				171.162												6253345	3678055		2
1607	Features1836			28.31				171.162												6253345	3678055		2
1608	Features1837			28.314				167.13												2443535	1368711		2
1609	Features1838			28.315				164.106												1373440		299323	2
1610	Features1839			28.349				298.12											766320	758601	702588	885542	4
1611	Features1840			28.376				204.114											300148	1103803		812305	3
1612	Features1841			28.418				342.276														1716201	1
1613	Features1842			28.418				376.203												3030530		4052285	2
1614	Features1843			28.419				440.217														5335065	1
1615	Features1844			28.427				192.151	192.15													61748448	1
1616	Features1846			28.494				343.178												821458			1
1617	Features1847			28.656				240.172											6280271	8076625	8880771	5587568	4
1618	Features1848			28.679				251.224												2520809		1371519	2
1619	Features1849			28.679				157.11												2520809		1371519	2
1620	Features1850			28.739				243.054													57647824		1
1621	Features1851			28.746				252.172														6082332	1
1622	Features1852			28.748				182.13													249796217		1
1623	Features1853			28.748				286.038													6799729		1
1624	Features1854			28.758				130.099														4032843	1
1625	Features1855			28.761				126.104														2506428	1
1626	Features1856			28.762				254.151														5252791	1
1627	Features1857			28.764				231.056														4174418	1
1628	Features1858			28.782				198.234											2530607			3439976	2
1629	Features1859			28.784				311.184														10653804	1
1630	Features1860			28.785				282.169											5063996			7169631	2
1631	Features1861			28.786				208.109											1690979			2282848	2
1632	Features1862			28.845				530.215											8035999	12315478	3451635	7210762	4
1633	Features1863			28.852				115.099	115.099										10675408	17639522	9547799	8732945	4
1634	Features1864			28.856				368.162											1007933	1754913	867159	1024147	4
1635	Features1865			28.874				244.24												52516318		104143076	2
1636	Features1866			28.881				186.161												77538733			1
1637	Features1867			28.883				363.158											1205832	2116715	1095179	2464539	4
1638	Features1869			28.89				325.298											1311442	1876039		2194321	3
1639	Features1870			28.897				286.156														4122219	1
1640	Features1871			28.901				642.398														18315222	1
1641	Features1872			28.903				224.12	224.119													4779262	1
1642	Features1873			28.905				336.158														18315222	1
1643	Features1874			28.91				274.179														22884163	1
1644	Features1875			28.91				204.114														2200771	1
1645	Features1877			28.914				476.303											3582024	1915181	839605	6054275	4
1646	Features1878			28.939				181.183													7296321	8414500	2
1647	Features1879			28.939				224.177											2081290	2045344	3301409	3800695	4
1648	Features1880			28.94				338.245													8276207	10456012	2
1649	Features1881			28.941				203.142													22762666	20292396	2
1650	Features1882			28.943				604.688														505296195	1
1651	Features1883			28.947				184.193											2081290	2045344	3301409	3800695	4
1652	Features1884			28.948				604.688											51787346	77538733	83691132	92581007	4
1653	Features1885			28.979				356.235											1021739	1188101		2098488	3
1654	Features1886			29.038				206.167											10019821	15642428	8129434	12182952	4
1655	Features1887			29.103				562.236												1147543		1059469	2
1656	Features1888			29.119				376.124														1438578	1
1657	Features1889			29.137				212.177											1188081	1351818		1708714	3
1658	Features1890			29.139				246.125											963869	928588		1529329	3
1659	Features1891			29.193				166.099											12363655	18120872	13201262	11463086	4
1660	Features1892			29.193				318.165											1732283	2254858	1275284	1098843	4
1661	Features1893			29.197				335.09											5641007	2861473	1738504	5056274	4
1662	Features1894			29.202				260.177											970536	1160878	844876	743118	4
1663	Features1895			29.204				266.151											25992613	32442183	17761036	16170782	4
1664	Features1896			29.204				266.188											2174930	3454246	2012825		3
1665	Features1897			29.209				240.208											906099	984494	564485	355221	4
1666	Features1898			29.22				242.13											1633879	2745647	1355706	1638354	4
1667	Features1899			29.269				262.12												1865801		1528228	2
1668	Features1900			29.28				302.199												3341587		2290611	2
1669	Features1901			29.361				608.288														2205371	1
1670	Features1902			29.534				346.25														6582410	1
1671	Features1903			29.539				274.193														6352123	1
1672	Features1904			29.543				190.099											2364984			2501597	2
1673	Features1905			29.671				87.0679	87.0676											40411070			1
1674	Features1906			29.716				530.215												1671237	150196		2
1675	Features1907			29.723				454.192											1299490	1741396	872155	1779596	4
1676	Features1908			29.849				295.121											27496502	35037089	22002787	21312691	4
1677	Features1909			29.851				367.091											632325	681191	391519	251285	4
1678	Features1910			29.887				287.117														2070342	1
1679	Features1911			29.907				284.235											209596		583800	826713	3
1680	Features1912			29.909				282.157											777988	904563		914224	3
1681	Features1914			30.118				208.109											3735600	3413190	3896132	2948777	4
1682	Features1915			30.125				620.356											1057518			1033749	2
1683	Features1916			30.148				222.161												1663329			1
1684	Features1917			30.197				466.104												7026280		2113308	2
1685	Features1918			30.23				318.167											1331966	1151822	936371		3
1686	Features1919			30.235				187.157											2076888				1
1687	Features1920			30.26				452.186											1596721	973491	2395674	2926094	4
1688	Features1921			30.262				258.002											965957		1281313	1287475	3
1689	Features1922			30.263				158.13											7300541	6177147	10373056	13110147	4
1690	Features1923			30.264				388.167											1876193		2618995	2786420	3
1691	Features1924			30.266				604.688											2104048	1977155	3268069	4147018	4
1692	Features1925			30.269				224.225											3359679	2452901	4313230	5321417	4
1693	Features1926			30.273				208.182											3827461	3346927	5739490	6523259	4
1694	Features1927			30.28				129.115	129.114											11421921			1
1695	Features1928			30.289				395.164											3028489	3392926	2561377	1801806	4
1696	Features1929			30.295				284.141											2677828	2514129	2139800	2166733	4
1697	Features1930			30.336				576.147											3304056	2490012	1508290		3
1698	Features1931			30.336				358.141											3547511	9762045	1783550	1254904	4
1699	Features1932			30.338				402.24											2714887	7638154	766389	1437670	4
1700	Features1934			30.34				224.177														1762220	1
1701	Features1935			30.34				192.187											19652000		29808246	37841999	3
1702	Features1936			30.345				144.114											4400769	11497880	1792138	2252184	4
1703	Features1937			30.345				253.178											2138833	7715868	1020374	1402667	4
1704	Features1938			30.347				168.151											7721266	16886446	2772471	2655874	4
1705	Features1939			30.351				729.214											3656653	8885998	1545463	1825966	4
1706	Features1940			30.351				188.141											4400769	11497880	1792138	2252184	4
1707	Features1941			30.397				185.141											1683259	1408446		1787935	3
1708	Features1942			30.4				260.141											8938214	10519359		10111993	3
1709	Features1943			30.402				284.141														6224318	1
1710	Features1944			30.403				370.141											2535682	2925937		2819607	3
1711	Features1945			30.41				220.146											8216835	4404123	4824729	13655762	4
1712	Features1946			30.41				128.156											1748882	1903578		2042502	3
1713	Features1947			30.412				164.12	164.119										747052		86907	854729	3
1714	Features1948			30.417				216.136											2112181	2726535		4085894	3
1715	Features1949			30.423				396.323												1607057	1242245	1897085	3
1716	Features1950			30.436				246.183												43672528			1
1717	Features1951			30.453				192.151	192.15											13751914	8219057	21947716	3
1718	Features1952			30.453				262.229											921689	2305983	1272055	4414423	4
1719	Features1953			30.462				464.238											1121390	1052059		1098044	3
1720	Features1955			30.484				214.156											2552146	2495834	3743021		3
1721	Features1956			30.485				244.182														5050321	1
1722	Features1957			30.486				236.104	236.103												2532053		1
1723	Features1958			30.491				376.224											915955		798926		2
1724	Features1959			30.515				338.209											1326511	1497680	1445153	1364484	4
1725	Features1960			30.518				345.18											1326511	1497680	1445153	1364484	4
1726	Features1961			30.518				408.068											1326511	1497680	1445153	1364484	4
1727	Features1962			30.527				170.13											40933945	52158723	51170649	30820293	4
1728	Features1963			30.533				370.141											2345006	2873266	2426726	1223723	4
1729	Features1964			30.589				230.058											368055	1002001	178894	216563	4
[truncated: 674 more rows]

## Sheet: Table S3 Sample vs blank
Table S3. Distribution of the ratio of internal standard-correct chemical abundance in the same to that in the blank sample.
Fold Bin	Normal Usage		HT-py Pyrolysis Decomposition
	Counts	Percentage	Counts	Percentage
1.5-50	2144	0.805	380	0.208
50-100	50	0.019	129	0.071
100-200	53	0.02	104	0.057
200-400	60	0.023	83	0.045
400-800	52	0.02	38	0.021
800-1600	36	0.014	19	0.01
1600-INF	267	0.1	1072	0.587
Notes: "Fold Bin" refers to the grouping of ratios between internal standard corrected compound abundance in the sample and the corresponding background signal. INF (infinity) occurs when the corresponding compound is not detected in the background sample.

## Sheet: Table S4 VOC and SVOC
Table S4. Numbers of VOCs and SVOCs detected under each experimental condition after filtering using sample responses ≥1.5× and ≥3× those of the corresponding blank control.
	Normal Operation					Pyrolysis Decomposition
	Blue	Green	White	Red	Total	HT-py MCL	HT-py DFL	TP-py 100℃	TP-py 200℃	TP-py 300℃	TP-py 400℃	TP-py 500℃	TP-py 600℃	Total
using 1.5 × sample/blank response threshold)
Proportion of volatile and semi-volatile compounds
Total	1063	1959	1724	1961	2662	1479	637	786	399	458	1491	993	295	1879
VOCs	961	1766	1564	1616	2206	1035	467	605	297	301	1045	781	240	1320
SVOCs	102	193	160	345	456	444	170	181	102	157	446	212	55	559
VOCs/sum	0.904	0.901	0.907	0.824	0.829	0.7	0.733	0.77	0.744	0.657	0.701	0.787	0.814	0.703
Number of compounds detected for the first time
Total								786	173	198	599	61	8	1825
VOCs								605	113	114	397	48	7	1284
SVOCs								181	60	84	202	13	1	541
using 3 × sample/blank response threshold)
Proportion of volatile and semi-volatile compounds
Total	552	1057	913	1038	1340	1430	544	704	366	419	1442	929	260	1849
VOCs	493	963	843	931	1181	1005	406	565	275	276	1016	735	212	1309
SVOCs	59	94	70	107	159	425	138	139	91	143	426	194	48	540
VOCs/sum	0.893116	0.911069	0.92333	0.896917	0.881343	0.702797	0.746324	0.802557	0.751366	0.658711	0.704577	0.791173	0.815385	0.70795
Number of compounds detected for the first time
Total								704	160	187	649	71	7	1778
VOCs								565	106	109	421	57	6	1264
SVOCs								139	54	78	228	14	1	514
Comparison
Difference in detected chemical counts
Total	511	902	811	923	1322	49	93	82	33	39	49	64	35	30
VOCs	468	803	721	685	1025	30	61	40	22	25	29	46	28	11
SVOCs	43	99	90	238	297	19	32	42	11	14	20	18	7	19
Difference Percentage = Difference / Chemical Counts Using 1.5× Threshold
Total	0.480715	0.460439	0.470418	0.470678	0.496619	0.0331305	0.145997	0.104326	0.0827068	0.0851528	0.0328638	0.0644512	0.118644	0.0159659
VOCs	0.486993	0.4547	0.460997	0.423886	0.464642	0.0289855	0.130621	0.0661157	0.0740741	0.0830565	0.0277512	0.0588988	0.116667	0.00833333
SVOCs	0.421569	0.512953	0.5625	0.689855	0.651316	0.0427928	0.188235	0.232044	0.107843	0.089172	0.044843	0.0849057	0.127273	0.0339893

## Sheet: Table S5 pyrolysis chemcials
Table S5. Features/compounds with S/N ≥ 1.5 relative to the background (blank) sample in the 7-day normal-operation experiment.
Chemical Identification																Concentrations or Internal Standard-Corrected Peak Area									Number of Samples the Chemical is Dected in the 8 Pyrolysis Samples	Release Dynamics						Number of Samples the Chemical is Dected in the 6 PT-Pyrolysis Samples	Normalized Peak Area							Peak Area Percentage
No.	Feature No.	Name	CAS	RT [min]	NIST Lib Hit Formula	sub group	structure group	Total Score	HRF Score	RHRF Score	SI	RSI	NIST RI	Predicted RI	RI Delta(%)	HT_600 MCL (F3)	HT_600 DFL (F4)		PT_100T (F5)	PT_200T (F6)	PT_300T (F7)	PT_400T (F8)	PT_500T (F9)	PT_600T (F10)		PT_100T (F5)	PT_200T (F6)	PT_300T (F7)	PT_400T (F8)	PT_500T (F9)	PT_600T (F10)		Minimum Value Among the Six Samples	100T.raw (F5)	200T.raw (F6)	300T.raw (F7)	400T.raw (F8)	500T.raw (F9)	600T.raw (F10)	Total Peak Area for the Six Samples	100T.raw (F5)	200T.raw (F6)	300T.raw (F7)	400T.raw (F8)	500T.raw (F9)	600T.raw (F10)
CL1																Concentrations Detected in Pyrolysis Experiment (ng/g)										At which temperature the chemical was first detected, indicated as "1"							Taking the Smallest as 1							Taking the total Peak Area of the Six Samples as Denomitor
1	features168	1-ethyl-2-methylbenzene		5.01	C9H12	alkylbenzene	BDs									26575.8	4604.47	5.77174	1785.65	83.937	1910.77	19160.9	73953.6	3864.23	8	1	0.5	0.333333	0.25	0.2	0.166667	6	83.937	21.2737	1	22.7643	228.278	881.061	46.0373	100759	0.0177219	0.000833046	0.0189637	0.190166	0.733964	0.0383511
2	features197	1,2,3-trimethylbenzene		5.44	C9H12	alkylbenzene	BDs									29426.3	896.586	32.8203	577.366	305.691	9431.87	3355.61	8499.65	431.005	8	1	0.5	0.333333	0.25	0.2	0.166667	6	305.691	1.88872	1	30.8542	10.9771	27.8047	1.40994	22601.2	0.0255458	0.0135255	0.417317	0.14847	0.376071	0.01907
3	features223	1-methyl-4-propylbenzene		5.72	C10H14	alkylbenzene	BDs									46402.4	1092.67	42.4669	566.082		1113.82	3240.58	30924.9	722.803	7	1	0	0.5	0.333333	0.25	0.2	5	566.082	1	0	1.9676	5.72457	54.6296	1.27685	36568.1	0.0154802	0	0.0304588	0.0886175	0.845678	0.0197659
4	features275	cyclopropylbenzene		6.29	C9H10	alkylbenzene	BDs									22077.9	702.545	31.4256	1197.01	822.059	1028.38	1836.02	7392.05	207.629	8	1	0.5	0.333333	0.25	0.2	0.166667	6	207.629	5.76513	3.95926	4.95296	8.84278	35.6021	1	12483.1	0.0958902	0.0658535	0.0823814	0.14708	0.592162	0.0166328
5	features278	1,2,3,5-tetramethylbenzene		6.32	C10H14	alkylbenzene	BDs									2940.06	591.201	4.97303	245.435	103.212	62.8889	1048.44	1312.25		7	1	0.5	0.333333	0.25	0.2	0	5	62.8889	3.90268	1.64119	1	16.6713	20.8662	0	2772.23	0.0885335	0.0372308	0.0226853	0.378195	0.473356	0
6	features358	naphthalene		6.95	C10H8	PAHs	PAHs									46033.9	4332.47	10.6253	8064.16	120.025	1156.53	2354.17	15854.2	4676.38	8	1	0.5	0.333333	0.25	0.2	0.166667	6	120.025	67.1872	1	9.63571	19.6139	132.09	38.9616	32225.4	0.250242	0.00372455	0.0358887	0.073053	0.491977	0.145114
7	features455	1,2,3,4,5-pentamethylbenzene		7.59	C11H16	alkylbenzene	BDs									7976.36	6162.24	1.29439	56.9974	149.865	101.617	7743.57	5438.35	41.9129	8	1	0.5	0.333333	0.25	0.2	0.166667	6	41.9129	1.3599	3.57563	2.42447	184.754	129.754	1	13532.3	0.00421195	0.0110746	0.00750918	0.572228	0.401879	0.00309725
8	features635	1-methyl-2-phenylbenzene		8.56	C13H12	alkylbenzene	BDs									162532	991.314	163.956	995.198	402.911	262.35	5437.57	65438.4	7674.49	8	1	0.5	0.333333	0.25	0.2	0.166667	6	262.35	3.7934	1.53578	1	20.7264	249.432	29.2529	80210.9	0.0124073	0.00502314	0.00327075	0.0677909	0.815829	0.0956788
9	features670	Dimethyl phthalate		8.75	C10H10O4	PAEs	PAEs									414913	1125.79	368.551	120563	38169.3	754.845	15882.1	8869.82	676.363	8	1	0.5	0.333333	0.25	0.2	0.166667	6	676.363	178.252	56.4331	1.11604	23.4816	13.114	1	184915	0.65199	0.206415	0.00408211	0.0858885	0.0479669	0.00365769
10	features710	1,4-diacetylbenzene		8.95	C10H10O2	alkylbenzene	BDs									14026.8	264.342	53.0631	6222.68	19.7381	0.442608	5886.09	5722.28	16.1724	8	1	0.5	0.333333	0.25	0.2	0.166667	6	0.442608	14059.1	44.5951	1	13298.6	12928.6	36.5389	17867.4	0.34827	0.0011047	2.47718e-05	0.329432	0.320264	0.000905136
11	features823	nonylbenzene		9.48	C15H24	alkylbenzene	BDs									1458.2	1048.05	1.39134	2513.11	113.682	193.701	2626.94	291.181	284.839	8	1	0.5	0.333333	0.25	0.2	0.166667	6	113.682	22.1064	1	1.70388	23.1077	2.56135	2.50557	6023.45	0.41722	0.0188733	0.0321579	0.436119	0.0483412	0.0472884
12	features871	Diethyl phthalate		9.61	C12H14O4	PAEs	PAEs									3.00365e+06	16715.1	179.697	627965	96395.9	1387.42	718875	101957	16624.2	8	1	0.5	0.333333	0.25	0.2	0.166667	6	1387.42	452.612	69.4783	1	518.136	73.4868	11.9821	1.5632e+06	0.401717	0.0616656	0.000887551	0.459872	0.0652233	0.0106347
13	features956	Benzophenone		10	C13H10O	ketone	BDs									1.70546e+06	466.266	3657.69	115147	109446	1974.57	24646.5	72360	2870.25	8	1	0.5	0.333333	0.25	0.2	0.166667	6	1974.57	58.3149	55.4279	1	12.4819	36.646	1.45361	326444	0.35273	0.335268	0.00604872	0.0754998	0.221661	0.00879247
14	features1049	2,6-diisopropylnaphthalene		10.49	C16H20	PAHs	PAHs									13005.1	395.868	32.8522	4528.93	228.091		4608.93	1070.85	180.733	7	1	0.5	0	0.333333	0.25	0.2	5	180.733	25.0587	1.26203	0	25.5014	5.92504	1	10617.5	0.426552	0.0214825	0	0.434087	0.100857	0.0170221
15	features1144	2-phenoxyethoxybenzene		10.95	C14H14O2	alkylbenzene	BDs									13661.3	189.698	72.0159	274.524			1438.34		523.254	5	1	0	0	0.5	0	0.333333	3	274.524	1	0	0	5.23939	0	1.90604	2236.11	0.122768	0	0	0.64323	0	0.234001
16	features1163	Diisobutyl phthalate		11.11	C16H22O4	PAEs	PAEs									5.59754e+06	33203	168.585	259172	26689.1	9296.98	1.40793e+06	96152.7	18471.6	8	1	0.5	0.333333	0.25	0.2	0.166667	6	9296.98	27.877	2.87072	1	151.44	10.3424	1.98684	1.81772e+06	0.142581	0.0146827	0.00511465	0.774562	0.0528975	0.010162
17	features1164	phenanthrene		11.12	C14H10	PAHs	PAHs									19290.2	3378.44	5.7098	5434.15	102.618	17.9137	2789.69	2468.67	2185.17	8	1	0.5	0.333333	0.25	0.2	0.166667	6	17.9137	303.352	5.72847	1	155.73	137.809	121.983	12998.2	0.418069	0.00789478	0.00137816	0.214621	0.189924	0.168113
18	features1174	Di-n-butyl phthalate		11.16	C16H22O4	PAEs	PAEs									3.74372e+07	7840.42	4774.9				8.53986e+06	35590.7	142473	5	#DIV/0!	#DIV/0!	#DIV/0!	1	0.5	0.333333	3	35590.7	0	0	0	239.946	1	4.00311	8.71792e+06	0	0	0	0.979575	0.00408247	0.0163426
19	features1414	Bis(2-ethylhexyl) phthalate		12.59	C24H38O4	PAEs	PAEs									1.8817e+07		#DIV/0!	71116.8			5.24591e+06	89726.9	19013.1	5	1	0	0	0.5	0.333333	0.25	4	19013.1	3.74041	0	0	275.91	4.71922	1	5.42577e+06	0.0131072	0	0	0.966851	0.0165372	0.00350422
20	features1589	Di-n-octyl phthalate		13.52	C24H38O4	PAEs	PAEs									3.72937e+07	7840.42	4756.6				8.53986e+06	35590.7	142473	5	#DIV/0!	#DIV/0!	#DIV/0!	1	0.5	0.333333	3	35590.7	0	0	0	239.946	1	4.00311	8.71792e+06	0	0	0	0.979575	0.00408247	0.0163426
																																0	0	#DIV/0!	#DIV/0!	#DIV/0!	#DIV/0!	#DIV/0!	#DIV/0!	0	#DIV/0!	#DIV/0!	#DIV/0!	#DIV/0!	#DIV/0!	#DIV/0!
CL2																Internal Standard-Corrected Peak Area
1	features150	Benzene, isocyanato-	103-71-9	4.85	C7 H5 N O	ester	BDs	99.4	98.5	100	960	967	1073	1076.2	0.00297176				30608.1				3.2916e+06	913.857	3	1	0	0	0	0.5	0.333333	3	913.857	33.4934	0	#VALUE!	#VALUE!	3601.87	1	3.32312e+06	0.00921066	0	#VALUE!	#VALUE!	0.990514	0.000275
2	features267	Benzofuran, 2-methyl-	4265-25-2	6.141	C9 H8 O	furan	BDs	98.8	85.4	100	852	939	1217	1128.36	0.0785589	4.82454e+06			44398			427240	1.14156e+06	45693.4	5	1	0	0	0.5	0.333333	0.25	4	44398	1	#VALUE!	#VALUE!	9.62296	25.712	1.02918	1.65889e+06	0.0267636	#VALUE!	#VALUE!	0.257545	0.688147	0.0275445
3	features272	3-Methylbenzofuran	21535-97-7	6.245	C9 H8 O	furan	BDs	98	100	100	889	900	1230	1146.28	0.0730359	4.82454e+06	2.45272e+06			3331.43		3.51947e+06	5826536	128345	6	#DIV/0!	1	0	0.5	0.333333	0.25	4	3331.43	#VALUE!	1	#VALUE!	1056.45	1748.96	38.5256	9.47768e+06	#VALUE!	0.000351502	#VALUE!	0.371343	0.614764	0.0135418
4	features274	2-Ethynylaniline	52670-38-9	6.259	C8 H7 N	aniline	BDs	98.9	100	100	751	943	1231	1124.38	0.0948298		54091.5		5406.57			164606	1.00258e+07	2.76483e+06	5	1	0	0	0.5	0.333333	0.25	4	5406.57	1	#VALUE!	#VALUE!	30.4455	1854.38	511.384	1.29607e+07	0.000417152	#VALUE!	#VALUE!	0.0127004	0.773558	0.213325
5	features310	Tetrahydrofurfuryl acrylate	2399-48-6	6.59	C8 H12 O3	ester	BDs	97.9	99.8	100	893	894	1272	1190.84	0.0681547				497558		4429.71	13317.7			3	1	0	0.5	0.333333	0	0	3	4429.71	112.323	0	1	3.00645	#VALUE!	0	515305	0.965559	0	0.00859629	0.0258443	#VALUE!	0
6	features594	Pyrrole, 2-methyl-5-phenyl-	3042-21-5	8.414	C11 H11 N	pyrrole	BDs	98	92.9	100	900	900	1522	1553.94	0.0205551	3.58214e+06						312711	1.26988e+06	50862.6	4	#DIV/0!	#DIV/0!	#DIV/0!	1	0.5	0.333333	3	50862.6	#VALUE!	0	#VALUE!	6.14816	24.9669	1	1633452	#VALUE!	0	#VALUE!	0.191442	0.77742	0.0311381
7	features665	1H-Inden-1-one, 2,3-dihydro-3,4,7-trimethyl-	35322-84-0	8.729	C12 H14 O	ketone	BDs	99.4	97.5	100	757	971	1570	1526.35	0.0285958							919649	497173		2	#DIV/0!	#DIV/0!	#DIV/0!	1	0.5	0	2	497173	0	0	0	1.84975	1	#VALUE!	1.41682e+06	0	0	0	0.649093	0.350907	#VALUE!
8	features693	10-Undecen-1-ol, acetate	112-19-6	8.876	C13 H24 O2	ester	others	99.3	98.2	100	829	963	1592	1508.67	0.055233	5.18199e+06						1.22433e+06	71390.9		3	#DIV/0!	#DIV/0!	#DIV/0!	1	0.5	0	2	71390.9	#VALUE!	#VALUE!	#VALUE!	17.1497	1	#VALUE!	1295722	#VALUE!	#VALUE!	#VALUE!	0.944903	0.0550974	#VALUE!
9	features728	p-Toluic acid, butyl ester	19277-56-6	9.032	C12 H16 O2	ester	BDs	96.2	84.5	94.7	826	915	1616	1517.28	0.0650652	833483						296123			2	#DIV/0!	#DIV/0!	#DIV/0!	1	0	0	1	296123	#VALUE!	#VALUE!	#VALUE!	1	#VALUE!	#VALUE!	296123	#VALUE!	#VALUE!	#VALUE!	1	#VALUE!	#VALUE!
10	features873	(5S)-5-(aminomethyl)-3-[(1S)-1-phenylethyl]-1,3-oxazolidin-2-one	917824-18-1	9.626	C12 H16 N2 O2	ketone	BDs	98.7	98.2	100	871	936	1711	1886.79	0.0931706	2.20097e+06			1.11515e+06	54358		65888.9			4	1	0.5	0	0.333333	0	0	3	54358	20.5149	1	#VALUE!	1.21213	#VALUE!	#VALUE!	1.2354e+06	0.902665	0.0440005	#VALUE!	0.0533342	#VALUE!	#VALUE!
11	features912	9H-fluorene-9-carbaldehyde	20615-64-9	9.803	C14 H10 O	aldehyde	BDs	97.2	90.8	100	851	857	1741	1714.35	0.0155481	4.17415e+06	22850		19711.3				486857	876973	5	1	0	0	0	0.5	0.333333	3	19711.3	1	0	#VALUE!	#VALUE!	24.6994	44.4909	1.38354e+06	0.014247	0	#VALUE!	#VALUE!	0.351892	0.633861
12	features842	Cyclooctasiloxane, hexadecamethyl-	556-68-3	9.528	C16 H48 O8 Si8	siloxane	siloxane	98.2	99.5	100	779	910			0.00989011				3.81853e+07			7.51569e+07	7.39353e+07		3	1	0	0	0.5	0.333333	0	3	3.81853e+07	1	0	0	1.96821	1.93622	0	1.87278e+08	0.203897	0	0	0.401313	0.39479	0
13	features371	Cyclohexasiloxane, dodecamethyl-	540-97-6	7.355	C12 H36 O6 Si6	siloxane	siloxane	97.6	97.7	100	812	880	1276	1401.98	0.0898599	14100	4184				4247.71		1.23423e+06		4	#DIV/0!	#DIV/0!	1	0	0.5	0	2	4247.71	#VALUE!	#VALUE!	1	#VALUE!	290.564	#VALUE!	1.23848e+06	#VALUE!	#VALUE!	0.00342978	#VALUE!	0.99657	#VALUE!
14	features90	Styrene	100-42-5	3.781	C8 H8	alkylbenzene	BDs	99	100	100	887	951			0.0799159	858378			93361.6				298763	84013	4	1	0	0	0	0.5	0.333333	3	84013	1.11128	#VALUE!	#VALUE!	0	3.55616	1	476138	0.196081	#VALUE!	#VALUE!	0	0.627472	0.176447
15	features109	Benzene, (1-methylethyl)-	98-82-8	4.151	C9 H12	alkylbenzene	BDs	99.5	99.3	100	902	973			0.0842754	489170								4300.57	2	#DIV/0!	#DIV/0!	#DIV/0!	#DIV/0!	#DIV/0!	1	1	4300.57	#VALUE!	#VALUE!	#VALUE!	#VALUE!	#VALUE!	1	4300.57	#VALUE!	#VALUE!	#VALUE!	#VALUE!	#VALUE!	1
16	features126	Cyclopropanecarboxylic acid, pent-2-en-4-ynyl ester	0	4.521	C9 H10 O2	ester	others	98.5	96	100	792	922			0.0694143	1.33996e+07									1	#DIV/0!	#DIV/0!	#DIV/0!	#DIV/0!	#DIV/0!	#DIV/0!	0	0	#VALUE!	#VALUE!	#VALUE!	#VALUE!	#VALUE!	#VALUE!	0	#VALUE!	#VALUE!	#VALUE!	#VALUE!	#VALUE!	#VALUE!
17	features141	Cyclotetrasiloxane, octamethyl-	556-67-2	4.774	C8 H24 O4 Si4	siloxane	siloxane	96.1	91.9	96.4	841	877			0.0809578	147914	178202					793671	272210	49639.6	5	#DIV/0!	#DIV/0!	#DIV/0!	1	0.5	0.333333	3	49639.6	0	0	0	15.9887	5.48374	1	1115521	0	0	0	0.71148	0.244021	0.044499
18	features442	Naphthalene, 1-(2-propenyl)-	2489-86-3	7.469	C13H12	alkylbenzene	BDs	98.7	97.9	99.5	764	944	1382	1452.11	0.0482815	7.97918e+06				1586.57	3209.71	788627	3229696		5	#DIV/0!	1	0.5	0.333333	0.25	0	4	1586.57	#VALUE!	1	2.02305	497.064	2035.64	#VALUE!	4.02312e+06	#VALUE!	0.000394363	0.000797817	0.196024	0.802784	#VALUE!
CL3															Internal Standard-Corrected Peak Area																	0	0	#DIV/0!	#DIV/0!	#DIV/0!	#DIV/0!	#DIV/0!	#DIV/0!	0	#DIV/0!	#DIV/0!	#DIV/0!	#DIV/0!	#DIV/0!	#DIV/0!
1	features80	Cyclotetrasiloxane, octamethyl-	556-67-2	3.661	C8 H24 O4 Si4			95.9	94.1	98.6	799	823							201478						1	1	0	0	0	0	0	1	201478	1	0	0	0	#VALUE!	0	201478	1	0	0	0	#VALUE!	0
2	features116	Cyclotetrasiloxane, octamethyl-	556-67-2	4.365	C8 H24 O4 Si4			94.3	90.6	94.8	783	817				4100.29	154966		565294					6997.43	4	1	0	0	0	0	0.5	2	6997.43	80.786	#VALUE!	#VALUE!	0	0	1	572292	0.987773	#VALUE!	#VALUE!	0	0	0.012227
3	features417	Cyclohexasiloxane, dodecamethyl-	540-97-6	7.023	C12 H36 O6 Si6			92.2	100	100	602	611	1327			3.51921e+06			4.38515e+07			5.66755e+06			3	1	0	0	0.5	0	0	2	5.66755e+06	7.7373	0	0	1	0	0	49519069	0.885548	0	0	0.114452	0	0
4	features312	Cyclohexasiloxane, dodecamethyl-	540-97-6	6.619	C12 H36 O6 Si6			96.6	98.3	100	806	830				1.12959e+06			351228			493420	16948.3		4	1	0	0	0.5	0.333333	0	3	16948.3	20.7235	#VALUE!	#VALUE!	29.1133	1	#VALUE!	861596	0.407648	#VALUE!	#VALUE!	0.572681	0.0196708	#VALUE!
5	features334	Cyclohexasiloxane, dodecamethyl-	540-97-6	6.765	C12 H36 O6 Si6			96.7	98.7	100	814	833					1893.5					47405.9	74506.5		3	#DIV/0!	#DIV/0!	#DIV/0!	1	0.5	0	2	47405.9	#VALUE!	#VALUE!	0	1	1.57167	#VALUE!	121912	#VALUE!	#VALUE!	0	0.388852	0.611148	#VALUE!
6	features546	1-Pentene, 3-ethyl-	4038-04-4	8.193	C7 H14			97.7	97.7	100	834	885	1489	660.625		2.36677e+07	89159.5		336945			5.42506e+06	112634		5	1	0	0	0.5	0.333333	0	3	112634	2.99151	#VALUE!	#VALUE!	48.1655	1	#VALUE!	5.87464e+06	0.0573558	#VALUE!	#VALUE!	0.923471	0.0191729	#VALUE!
7	features587	Pentafluoropropionic acid	422-64-0	8.391	C3 H F5 O2			96.7	92.9	100	775	833	1518	734.51									6.97313e+06		1	#DIV/0!	#DIV/0!	#DIV/0!	#DIV/0!	1	0	1	6.97313e+06	#VALUE!	#VALUE!	0	#VALUE!	1	#VALUE!	6.97313e+06	#VALUE!	#VALUE!	0	#VALUE!	1	#VALUE!
8	features16	Butanoic acid, 2-propenyl ester	2051-78-7	0.709	C7 H12 O2			98.2	98.2	100	872	910		886.325		18140.6						42885.4			2	#DIV/0!	#DIV/0!	#DIV/0!	1	0	0	1	42885.4	#VALUE!	0	0	1	0	0	42885.4	#VALUE!	0	0	1	0	0
9	features19	(E/Z)-N-[2-(Diethylamino)ethyl]-5-[(5-fluoro-2-methyl-2-oxido-3H-2lambda4-benzo[c]isothiazol-3-ylidene)methyl]-2,4-dimethyl-1H-pyrrole-3-carboxamide	0	0.915	C22 H29 F N4 O2 S			99.1	97.8	100	910	952		0								2488105			1	#DIV/0!	#DIV/0!	#DIV/0!	1	0	0	1	2488105	#VALUE!	0	0	1	0	0	2488105	#VALUE!	0	0	1	0	0
10	features20	Propane, 2-methoxy-2-(1-methylethoxy)-	87025-34-1	0.992	C7 H16 O2			99.1	94.3	100	831	954		769.208		21145.7						10236.6	5626.86	2849.14	4	#DIV/0!	#DIV/0!	#DIV/0!	1	0.5	0.333333	3	2849.14	#VALUE!	#VALUE!	#VALUE!	3.59286	1.97493	1	18712.6	#VALUE!	#VALUE!	#VALUE!	0.547042	0.300699	0.152258
11	features21	2-Acetoxyethyl propanoate	0	1.05	C7 H12 O4			99.6	93.9	100	851	977		0					5062.29			38431.4			2	1	0	0	0.5	0	0	2	5062.29	1	#VALUE!	#VALUE!	7.59171	#VALUE!	#VALUE!	43493.7	0.116391	#VALUE!	#VALUE!	0.883609	#VALUE!	#VALUE!
12	features26	Oxalic acid, butyl cyclobutyl ester	0	1.315	C10 H16 O4			98	98.5	100	843	898		0		2890	2025		1480.57			2284.29			4	1	0	0	0.5	0	0	2	1480.57	1	#VALUE!	#VALUE!	1.54284	#VALUE!	#VALUE!	3764.86	0.393261	#VALUE!	#VALUE!	0.606739	#VALUE!	#VALUE!
13	features27	1,3-Hexadien-5-yne	10420-90-3	1.33	C6 H6			98.6	98.7	99.8	887	936		659.631		4029.57						3282.43	469248		3	#DIV/0!	#DIV/0!	#DIV/0!	1	0.5	0	2	3282.43	#VALUE!	0	0	1	142.957	#VALUE!	472530	#VALUE!	0	0	0.0069465	0.993054	#VALUE!
14	features30	1-[2-[(1-Hydroxycyclopentyl)methyl]allyl]cyclohexanol	0	1.681	C15 H26 O2			99.2	97.2	100	931	961		0									1900.14		1	#DIV/0!	#DIV/0!	#DIV/0!	#DIV/0!	1	0	1	1900.14	#VALUE!	#VALUE!	#VALUE!	0	1	0	1900.14	#VALUE!	#VALUE!	#VALUE!	0	1	0
15	features31	4-Methyl-1-nonanol	1489-47-0	1.723	C10 H22 O			97.5	100	100	764	874		1226.5		158827	10242.5							11021.7	3	#DIV/0!	#DIV/0!	#DIV/0!	#DIV/0!	#DIV/0!	1	1	11021.7	#VALUE!	#VALUE!	#VALUE!	#VALUE!	#VALUE!	1	11021.7	#VALUE!	#VALUE!	#VALUE!	#VALUE!	#VALUE!	1
16	features32	1,3,5-Cycloheptatriene	544-25-2	1.75	C7 H8			98.8	99.3	99.9	939	940		782.745		16736.1									1	#DIV/0!	#DIV/0!	#DIV/0!	#DIV/0!	#DIV/0!	#DIV/0!	0	0	#VALUE!	#DIV/0!	#VALUE!	#VALUE!	#VALUE!	#DIV/0!	0	#VALUE!	#DIV/0!	#VALUE!	#VALUE!	#VALUE!	#DIV/0!
17	features33	1,3-Dioxa-2-(dimethylsila)-cyclopentane	0	1.879	C4 H10 O2 Si			95.9	98.9	98.8	813	817		0		3482.86					772.286		110855	833.429	4	#DIV/0!	#DIV/0!	1	0	0.5	0.333333	3	772.286	#VALUE!	#VALUE!	1	#VALUE!	143.542	1.07917	112461	#VALUE!	#VALUE!	0.00686715	#VALUE!	0.985722	0.00741083
18	features34	1-Propanol, 2-isopropoxy-	0	1.945	C6 H14 O2			99.8	95.8	100	863	990		0		107536									1	#DIV/0!	#DIV/0!	#DIV/0!	#DIV/0!	#DIV/0!	#DIV/0!	0	0	#VALUE!	#VALUE!	#VALUE!	#DIV/0!	#VALUE!	#DIV/0!	0	#VALUE!	#VALUE!	#VALUE!	#DIV/0!	#VALUE!	#DIV/0!
19	features35	2,2-Dimethylpropyl 3,3-dimethyl-2-oxidanylidene-butanoate	0	1.999	C11 H20 O3			98.6	92.9	100	835	930		0		418301						2.31518e+06			2	#DIV/0!	#DIV/0!	#DIV/0!	1	0	0	1	2.31518e+06	#VALUE!	#VALUE!	#VALUE!	1	#VALUE!	#VALUE!	2.31518e+06	#VALUE!	#VALUE!	#VALUE!	1	#VALUE!	#VALUE!
20	features37	Cyclotrisiloxane, hexamethyl-	541-05-9	2.023	C6 H18 O3 Si3			96.8	87.1	96.4	849	911		849.392		86794.3			37410.6						2	1	0	0	0	0	0	1	37410.6	1	#VALUE!	#VALUE!	#VALUE!	#VALUE!	#VALUE!	37410.6	1	#VALUE!	#VALUE!	#VALUE!	#VALUE!	#VALUE!
21	features38	tert-Butylcyclopropane	0	2.028	C7 H14			96.1	99.5	99.8	751	808		0		1.66918e+07									1	#DIV/0!	#DIV/0!	#DIV/0!	#DIV/0!	#DIV/0!	#DIV/0!	0	0	#VALUE!	#DIV/0!	#DIV/0!	#VALUE!	#DIV/0!	#VALUE!	0	#VALUE!	#DIV/0!	#DIV/0!	#VALUE!	#DIV/0!	#VALUE!
22	features42	1-Hydroxy-3-penten-2-one	0	2.082	C5 H8 O2			98.7	89.6	100	776	936		0		6.99263e+06						1.71326e+06		7194.86	3	#DIV/0!	#DIV/0!	#DIV/0!	1	0	0.5	2	7194.86	#VALUE!	#VALUE!	#VALUE!	238.123	#VALUE!	1	1.72046e+06	#VALUE!	#VALUE!	#VALUE!	0.995818	#VALUE!	0.00418194
23	features43	1-Propene, 3-(ethenyloxy)-	3917-15-5	2.125	C5 H8 O			98.9	99.9	100	916	942		602.287		1147900								2969.43	2	#DIV/0!	#DIV/0!	#DIV/0!	#DIV/0!	#DIV/0!	1	1	2969.43	#VALUE!	#VALUE!	#VALUE!	#VALUE!	#VALUE!	1	2969.43	#VALUE!	#VALUE!	#VALUE!	#VALUE!	#VALUE!	1
24	features44	(5S,1'S)-5-(1'-Azido)ethyl-2,4-tetrahydro-2-hydroxyfuran	0	2.168	C6 H11 N3 O2			99.7	99.8	100	859	982		0		3.49602e+07	2530.5			978		751390	1192	2980.86	6	#DIV/0!	1	0	0.5	0.333333	0.25	4	978	#VALUE!	1	#VALUE!	768.293	1.21881	3.04791	756541	#VALUE!	0.00129273	#VALUE!	0.993192	0.00157559	0.00394011
25	features45	1-Pentene, 3-ethyl-2-methyl-	19780-66-6	2.181	C8 H16			97.2	99.8	99.9	859	861		755.666		6740931									1	#DIV/0!	#DIV/0!	#DIV/0!	#DIV/0!	#DIV/0!	#DIV/0!	0	0	#VALUE!	#VALUE!	#VALUE!	#VALUE!	#VALUE!	#VALUE!	0	#VALUE!	#VALUE!	#VALUE!	#VALUE!	#VALUE!	#VALUE!
26	features48	Cyclotrisiloxane, hexamethyl-	541-05-9	2.362	C6 H18 O3 Si3			97.4	93.5	100	805	867		849.392		618825	7667.5								2	#DIV/0!	#DIV/0!	#DIV/0!	#DIV/0!	#DIV/0!	#DIV/0!	0	0	#VALUE!	#VALUE!	#VALUE!	#VALUE!	#VALUE!	#VALUE!	0	#VALUE!	#VALUE!	#VALUE!	#VALUE!	#VALUE!	#VALUE!
27	features49	Cyclopentane, 1,2,3-trimethyl-, (1α,2α,3α)-	2613-69-6	2.384	C8 H16			96.4	100	100	821	821		754.614		719863				1168.86		9120.57			3	#DIV/0!	1	0	0.5	0	0	2	1168.86	#VALUE!	1	#VALUE!	7.80298	#VALUE!	#VALUE!	10289.4	#VALUE!	0.113598	#VALUE!	0.886402	#VALUE!	#VALUE!
28	features52	Toluene	108-88-3	2.566	C7 H8			98.9	99.8	99.9	946	949		766.629		10025.4						7521.93	361911		3	#DIV/0!	#DIV/0!	#DIV/0!	1	0.5	0	2	7521.93	#VALUE!	0	0	1	48.1141	#VALUE!	369433	#VALUE!	0	0	0.0203607	0.979639	#VALUE!
29	features54	Cyclopentane, 1,2,3-trimethyl-, (1α,2α,3α)-	2613-69-6	2.652	C8 H16			95.2	99.8	99.8	763	764		754.614			258420				12545	2.5245e+07	446474		4	#DIV/0!	#DIV/0!	1	0.5	0.333333	0	3	12545	#VALUE!	0	1	2012.35	35.5898	0	2.5704e+07	#VALUE!	0	0.000488056	0.982142	0.0173698	0
30	features55	2-Butenoic acid, 2-propenyl ester	20474-93-5	2.67	C7 H10 O2			90.9	95.7	99	857	906		925.579			30777.5					2.15209e+06	1.53243e+06		3	#DIV/0!	#DIV/0!	#DIV/0!	1	0.5	0	2	1.53243e+06	#VALUE!	#VALUE!	0	1.40436	1	#VALUE!	3.68452e+06	#VALUE!	#VALUE!	0	0.584089	0.415911	#VALUE!
31	features56	4,4-Dimethyl-5-methylene-1,3-dioxolan-2-one	0	2.693	C6 H8 O3			97.2	86	96.1	876	936		0			2094.5					85367.1			2	#DIV/0!	#DIV/0!	#DIV/0!	1	0	0	1	85367.1	#VALUE!	#VALUE!	#VALUE!	1	#VALUE!	#VALUE!	85367.1	#VALUE!	#VALUE!	#VALUE!	1	#VALUE!	#VALUE!
32	features58	1-Propanol, 2-isopropoxy-	0	2.747	C6 H14 O2			99	97.9	100	850	949		0		41960.4						1.80175e+07			2	#DIV/0!	#DIV/0!	#DIV/0!	1	0	0	1	1.80175e+07	#VALUE!	0	#VALUE!	1	#VALUE!	0	1.80175e+07	#VALUE!	0	#VALUE!	1	#VALUE!	0
33	features60	Ethyl (E)-2-(1, 1-dimethylethyl)-5-acetoxy-3-hexenoate	0	2.808	C14 H24 O4			97.3	99.3	100	776	865		0			88112.5				2565.71		122911		3	#DIV/0!	#DIV/0!	1	0	0.5	0	2	2565.71	#VALUE!	#VALUE!	1	#VALUE!	47.905	#VALUE!	125476	#VALUE!	#VALUE!	0.0204478	#VALUE!	0.979552	#VALUE!
34	features65	Oxirane, (ethoxymethyl)-	4016-11-9	3.016	C5 H10 O2			98.1	97.9	100	802	903	900	785.901								287684			1	#DIV/0!	#DIV/0!	#DIV/0!	1	0	0	1	287684	#VALUE!	#VALUE!	#VALUE!	1	#VALUE!	0	287684	#VALUE!	#VALUE!	#VALUE!	1	#VALUE!	0
35	features69	1,3,5-Triazine, 1,3,5-tricyclohexylhexahydro-	6281-14-7	3.271	C21 H39 N3			97	91.2	100	756	848	923	2563.71		2.10953e+06									1	#DIV/0!	#DIV/0!	#DIV/0!	#DIV/0!	#DIV/0!	#DIV/0!	0	0	#VALUE!	#VALUE!	#VALUE!	#VALUE!	#VALUE!	#VALUE!	0	#VALUE!	#VALUE!	#VALUE!	#VALUE!	#VALUE!	#VALUE!
36	features70	6-Methylhomofulvene	0	3.311	C8 H10			98.2	99.4	100	878	910		0		3.91119e+06							116514	27090.9	3	#DIV/0!	#DIV/0!	#DIV/0!	#DIV/0!	1	0.5	2	27090.9	#VALUE!	#VALUE!	#VALUE!	#VALUE!	4.30085	1	143605	#VALUE!	#VALUE!	#VALUE!	#VALUE!	0.811351	0.188649
37	features71	Glyoxal trimeric	4405-13-4	3.375	C6 H10 O8			97	98.7	99.2	841	866	932	1761.59							7437.29	4.09458e+06			2	#DIV/0!	#DIV/0!	1	0.5	0	0	2	7437.29	#VALUE!	#VALUE!	1	550.547	#VALUE!	#VALUE!	4.10201e+06	#VALUE!	#VALUE!	0.00181308	0.998187	#VALUE!	#VALUE!
38	features73	Carbonic acid, 2-ethoxyethyl 2-methoxyethyl ester	0	3.397	C8 H16 O5			98	100	100	824	897		0		325263						779914			2	#DIV/0!	#DIV/0!	#DIV/0!	1	0	0	1	779914	#VALUE!	#VALUE!	0	1	0	#VALUE!	779914	#VALUE!	#VALUE!	0	1	0	#VALUE!
39	features75	Ethylbenzene	100-41-4	3.519	C8 H10			98.1	99	100	884	902				3.53729e+06	10814					3680.29	226217	3127.43	5	#DIV/0!	#DIV/0!	#DIV/0!	1	0.5	0.333333	3	3127.43	#VALUE!	#VALUE!	#VALUE!	1.17678	72.3331	1	233024	#VALUE!	#VALUE!	#VALUE!	0.0157936	0.970785	0.013421
40	features84	1,3-Octadien-5-yne, (E)-	0	3.689	C8 H10			98.1	100	100	862	902		0		49694.6	5897					38186.3	225361	13447.1	5	#DIV/0!	#DIV/0!	#DIV/0!	1	0.5	0.333333	3	13447.1	#VALUE!	#VALUE!	#VALUE!	2.83973	16.759	1	276994	#VALUE!	#VALUE!	#VALUE!	0.13786	0.813594	0.0485467
41	features85	1,3-Dimethyl-3-(2-(piperidin-1-yl)ethyl)indolin-2-one	0	3.725	C17 H24 N2 O			98.9	99	100	859	944		0		14058.6						4297.71	726975		3	#DIV/0!	#DIV/0!	#DIV/0!	1	0.5	0	2	4297.71	#VALUE!	#VALUE!	#VALUE!	1	169.154	#VALUE!	731273	#VALUE!	#VALUE!	#VALUE!	0.00587703	0.994123	#VALUE!
42	features92	6-Methylhomofulvene	0	3.836	C8 H10			99.3	99.5	99.9	867	969		0		4409470	684021					1.49662e+06	1.58458e+07	4.52341e+06	5	#DIV/0!	#DIV/0!	#DIV/0!	1	0.5	0.333333	3	1.49662e+06	#VALUE!	#VALUE!	#VALUE!	1	10.5877	3.02242	2.18658e+07	#VALUE!	#VALUE!	#VALUE!	0.0684456	0.724683	0.206871
43	features95	Propanoic acid, propyl ester	106-36-5	3.895	C6 H12 O2			97.1	99	99.3	864	869				7.14768e+06									1	#DIV/0!	#DIV/0!	#DIV/0!	#DIV/0!	#DIV/0!	#DIV/0!	0	0	#VALUE!	#VALUE!	#VALUE!	#VALUE!	#VALUE!	#VALUE!	0	#VALUE!	#VALUE!	#VALUE!	#VALUE!	#VALUE!	#VALUE!
44	features97	3-Ethyl-5,5-dimethylcyclohex-2-en-1-one	28017-78-9	3.964	C10 H16 O			95	99.3	99.2	766	766	986	1227		3.74623e+06						488330	21903.4		3	#DIV/0!	#DIV/0!	#DIV/0!	1	0.5	0	2	21903.4	#VALUE!	#VALUE!	#VALUE!	22.2947	1	#VALUE!	510233	#VALUE!	#VALUE!	#VALUE!	0.957072	0.0429283	#VALUE!
45	features100	1-Butene, 1-(1-ethoxyethoxy)-, (E)-	0	3.985	C8 H16 O2			98.5	99.8	100	754	925		0			986.5		2612		1169.14	234814	410.286		5	1	0	0.5	0.333333	0.25	0	4	410.286	6.3663	#VALUE!	2.84958	572.318	1	#VALUE!	239005	0.0109286	#VALUE!	0.00489171	0.982463	0.00171664	#VALUE!
46	features106	6-Methylhomofulvene	0	4.062	C8 H10			98.2	93.2	100	848	907		0		137117	1404		998	1087.14		11838.3	44530.9		6	1	0.5	0	0.333333	0.25	0	4	998	1	1.08932	#VALUE!	11.862	44.6201	#VALUE!	58454.3	0.0170732	0.0185982	#VALUE!	0.202522	0.761807	#VALUE!
47	features107	Styrene	100-42-5	4.08	C8 H8			98.6	97	100	896	928				90157.4	14882.5						340359		3	#DIV/0!	#DIV/0!	#DIV/0!	#DIV/0!	1	0	1	340359	0	#VALUE!	#VALUE!	#VALUE!	1	0	340359	0	#VALUE!	#VALUE!	#VALUE!	1	0
48	features113	2-Methylene-3-oxobutyl acetate	0	4.289	C7 H10 O3			98.3	96.9	100	809	912		0		3.13433e+06			22008.9			1505916			3	1	0	0	0.5	0	0	2	22008.9	1	#VALUE!	#VALUE!	68.4232	#VALUE!	#VALUE!	1.52792e+06	0.0144044	#VALUE!	#VALUE!	0.985596	#VALUE!	#VALUE!
49	features117	(1-Diethoxyphosphorylcyclopropyl)amine	0	4.368	C7 H16 N O3 P			97.1	100	100	753	853		0		799620			625857						2	1	0	0	0	0	0	1	625857	1	#VALUE!	#VALUE!	#VALUE!	#VALUE!	#VALUE!	625857	1	#VALUE!	#VALUE!	#VALUE!	#VALUE!	#VALUE!
50	features119	6,6-Dimethylhomofulvene	0	4.374	C9 H12			96.8	99.7	100	779	837		0			165586					219923	918642	26198.6	4	#DIV/0!	#DIV/0!	#DIV/0!	1	0.5	0.333333	3	26198.6	#VALUE!	#VALUE!	#VALUE!	8.39445	35.0646	1	1.16476e+06	#VALUE!	#VALUE!	#VALUE!	0.188813	0.788694	0.0224926
51	features121	1-(Cyclopentylmethyl)allylbenzene	0	4.45	C15 H20			97	94.6	100	763	850		0		97007.6									1	#DIV/0!	#DIV/0!	#DIV/0!	#DIV/0!	#DIV/0!	#DIV/0!	0	0	#DIV/0!	#VALUE!	#VALUE!	#VALUE!	#VALUE!	#VALUE!	0	#DIV/0!	#VALUE!	#VALUE!	#VALUE!	#VALUE!	#VALUE!
52	features123	2-(Trimethylsilyl)ethyl 1-oxo-2-azaspiro[5.5]undec-8-ene-2-carboxylate	0	4.454	C16 H27 N O3 Si			98.6	97.8	100	913	930		0		78713.7	180716		680450						3	1	0	0	0	0	0	1	680450	1	#VALUE!	#VALUE!	#VALUE!	#VALUE!	#VALUE!	680450	1	#VALUE!	#VALUE!	#VALUE!	#VALUE!	#VALUE!
53	features124	1-Undecen-3-ol	35329-42-1	4.485	C11 H22 O			98.1	100	100	816	902	1036	1284.3		113980			1303.43	1046.57		2856.86	357.429	645.429	6	1	0.5	0	0.333333	0.25	0.2	5	357.429	3.64668	2.92806	#VALUE!	7.99281	1	1.80576	6209.71	0.209902	0.168538	#VALUE!	0.460063	0.0575596	0.103939
54	features128	1-(1-Methylpropoxy)-2-propanol	0	4.532	C7 H16 O2			99.9	94.9	100	823	994		0		172044						365401	811.714		3	#DIV/0!	#DIV/0!	#DIV/0!	1	0.5	0	2	811.714	#VALUE!	#VALUE!	#VALUE!	450.16	1	#VALUE!	366213	#VALUE!	#VALUE!	#VALUE!	0.997783	0.00221651	#VALUE!
55	features129	4-Hydroxy-3-hexanone	4984-85-4	4.535	C6 H12 O2			98.8	98.4	100	889	941				2.65893e+07			11041.7			679557			3	1	0	0	0.5	0	0	2	11041.7	1	#VALUE!	#VALUE!	61.5445	#VALUE!	#VALUE!	690599	0.0159886	#VALUE!	#VALUE!	0.984011	#VALUE!	#VALUE!
56	features132	Propanoic acid, ethenyl ester	105-38-4	4.654	C5 H8 O2			98.6	91.2	100	856	927	1053	689.154			14671					452577	2665.14		3	#DIV/0!	#DIV/0!	#DIV/0!	1	0.5	0	2	2665.14	#VALUE!	#VALUE!	#VALUE!	169.813	1	#VALUE!	455242	#VALUE!	#VALUE!	#VALUE!	0.994146	0.00585434	#VALUE!
57	features137	unidentified C3-benzene	0	4.727	C9 H12			98	95.8	100	864	900		0		108918									1	#DIV/0!	#DIV/0!	#DIV/0!	#DIV/0!	#DIV/0!	#DIV/0!	0	0	#VALUE!	#VALUE!	#DIV/0!	#DIV/0!	#DIV/0!	#VALUE!	0	#VALUE!	#VALUE!	#DIV/0!	#DIV/0!	#DIV/0!	#VALUE!
58	features147	x - ethyl - x - methyl - benzene	0	4.826	C9 H12			97.6	99.7	100	794	878		0		232674	28403					358944	863363	29516.4	5	#DIV/0!	#DIV/0!	#DIV/0!	1	0.5	0.333333	3	29516.4	#VALUE!	#VALUE!	#VALUE!	12.1608	29.2503	1	1.25182e+06	#VALUE!	#VALUE!	#VALUE!	0.286737	0.689684	0.0235787
59	features155	Dibutyl succinate	141-03-7	4.905	C12 H22 O4			98.1	97.9	100	815	905	1078	1567.76		356033				402.286		72494.3			3	#DIV/0!	1	0	0.5	0	0	2	402.286	#VALUE!	1	#VALUE!	180.206	#VALUE!	#VALUE!	72896.6	#VALUE!	0.00551858	#VALUE!	0.994481	#VALUE!	#VALUE!
60	features156	1,4,7,10,13-Pentaoxacycloheptadecane	0	4.918	C12 H24 O5			99.2	99.5	100	781	960		0		453695						16816.4			2	#DIV/0!	#DIV/0!	#DIV/0!	1	0	0	1	16816.4	0	#VALUE!	#VALUE!	1	#VALUE!	#VALUE!	16816.4	0	#VALUE!	#VALUE!	1	#VALUE!	#VALUE!
61	features157	4-Methoxy-1-pentene	98386-09-5	4.928	C6 H12 O			98.8	97.4	99.8	860	943	1081	0		198593	3286				1017.14	335185	1853.43		5	#DIV/0!	#DIV/0!	1	0.5	0.333333	0	3	1017.14	#VALUE!	#VALUE!	1	329.536	1.82219	#VALUE!	338055	#VALUE!	#VALUE!	0.0030088	0.991509	0.00548262	#VALUE!
62	features158	3,7-Dioxabicyclo[4.1.0]heptane, 2-methoxy-6-methyl-, (1α,2β,6α)-	0	4.933	C7 H12 O3			98.3	96.5	97.4	815	968		0		2446430			39326.9		35522.3	1.51675e+06			4	1	0	0.5	0.333333	0	0	3	35522.3	1.1071	#VALUE!	1	42.6985	#VALUE!	#VALUE!	1.5916e+06	0.024709	#VALUE!	0.0223186	0.952972	#VALUE!	#VALUE!
63	features160	1,3,6-Trioxa-2-silacyclooctane, 2,2,-dimethylsilyl-	0	4.937	C6 H14 O3 Si			96.4	95.1	100	786	817		0		876996									1	#DIV/0!	#DIV/0!	#DIV/0!	#DIV/0!	#DIV/0!	#DIV/0!	0	0	#VALUE!	#DIV/0!	#VALUE!	#VALUE!	#VALUE!	#VALUE!	0	#VALUE!	#DIV/0!	#VALUE!	#VALUE!	#VALUE!	#VALUE!
64	features161	1-Propene, 1-(1-methylethoxy)-, (Z)-	4188-64-1	4.946	C6 H12 O			96.8	97.8	98.5	851	870	1082	0			1773.5					35527.4		946.571	3	#DIV/0!	#DIV/0!	#DIV/0!	1	0	0.5	2	946.571	#VALUE!	#VALUE!	#VALUE!	37.5327	#VALUE!	1	36474	#VALUE!	#VALUE!	#VALUE!	0.974048	#VALUE!	0.025952
65	features167	4-Ethynyl pyridine	0	5	C7 H5 N			99.4	98.9	100	913	967		0		78939.4			8009.71			113584			3	1	0	0	0.5	0	0	2	8009.71	1	0	0	14.1808	0	#VALUE!	121594	0.0658728	0	0	0.934127	0	#VALUE!
66	features170	2,3-Dimethylenebicyclo[2.2.1]hept-5-ene	0	5.015	C9 H10			98.3	100	100	807	913		0		3.5977e+06	1.63711e+06					844456	3.3897e+06		4	#DIV/0!	#DIV/0!	#DIV/0!	1	0.5	0	2	844456	#VALUE!	#VALUE!	#VALUE!	1	4.01407	#VALUE!	4.23416e+06	#VALUE!	#VALUE!	#VALUE!	0.199439	0.800561	#VALUE!
67	features172	Propanoic acid, 2-methyl-, 2-ethyl-3-hydroxyhexyl ester	74367-31-0	5.018	C12 H24 O3			98	99.6	100	848	897	1090	1382.56			1972.5		693.429	341.429		147693			4	1	0.5	0	0.333333	0	0	3	341.429	2.03096	1	#VALUE!	432.573	#VALUE!	#VALUE!	148728	0.0046624	0.00229566	#VALUE!	0.993042	#VALUE!	#VALUE!
68	features174	1,3,6-Trioxa-2-silacyclooctane, 2,2,-dimethylsilyl-	0	5.053	C6 H14 O3 Si			95.7	100	100	775	782		0		122966	2181			2399.43	11416.9		107691		5	#DIV/0!	1	0.5	0	0.333333	0	3	2399.43	#VALUE!	1	4.75816	#VALUE!	44.8818	#VALUE!	121507	#VALUE!	0.0197473	0.0939606	#VALUE!	0.886292	#VALUE!
69	features176	7-Vinyltetracyclo[4.1.0.0(1,5).0(2,6)]heptane	0	5.098	C9 H10			99.8	100	100	818	990		0		7.14151e+06	223761					1.16865e+06	1.28211e+06		4	#DIV/0!	#DIV/0!	#DIV/0!	1	0.5	0	2	1.16865e+06	#VALUE!	#VALUE!	#VALUE!	1	1.09709	#VALUE!	2.45077e+06	#VALUE!	#VALUE!	#VALUE!	0.476852	0.523148	#VALUE!
70	features179	2,3-Heptadien-5-yne, 2,4-dimethyl-	41898-89-9	5.143	C9 H12			99.6	100	100	980	980	1103	0		108141						28030	170464	8997.71	4	#DIV/0!	#DIV/0!	#DIV/0!	1	0.5	0.333333	3	8997.71	#VALUE!	#VALUE!	#VALUE!	3.11524	18.9453	1	207492	#VALUE!	#VALUE!	#VALUE!	0.13509	0.821546	0.0433642
71	features183	Benzofuran	271-89-6	5.213	C8 H6 O			98.8	99.9	100	939	940				30151.4			11369.1			1.14619e+07	7.89028e+06	81195.4	5	1	0	0	0.5	0.333333	0.25	4	11369.1	1	0	0	1008.16	694.008	7.14174	1.94447e+07	0.000584691	0	0	0.589459	0.40578	0.00417571
72	features185	2-Butanone, 1-(acetyloxy)-	1575-57-1	5.234	C6 H10 O3			99.6	80	100	821	977	1113	940.574		2.12516e+06						321801			2	#DIV/0!	#DIV/0!	#DIV/0!	1	0	0	1	321801	#VALUE!	#VALUE!	#VALUE!	1	#VALUE!	#VALUE!	321801	#VALUE!	#VALUE!	#VALUE!	1	#VALUE!	#VALUE!
73	features186	Cyclopentane, 1-methyl-2-methylene-3-(1-methylethyl)-, cis-(-)-	0	5.276	C10 H18			99.1	100	100	922	956		0		600129						7830			2	#DIV/0!	#DIV/0!	#DIV/0!	1	0	0	1	7830	#VALUE!	#VALUE!	#VALUE!	1	#VALUE!	#VALUE!	7830	#VALUE!	#VALUE!	#VALUE!	1	#VALUE!	#VALUE!
74	features191	1,4-Cyclohexadiene, 1,6,6-trimethyl-3-methylene-	0	5.403	C10 H14			98.8	99.5	100	801	939		0		84538.6	96660					151276	1.79358e+06		4	#DIV/0!	#DIV/0!	#DIV/0!	1	0.5	0	2	151276	#VALUE!	#VALUE!	#VALUE!	1	11.8563	#VALUE!	1.94485e+06	#VALUE!	#VALUE!	#VALUE!	0.0777829	0.922217	#VALUE!
75	features209	3,4-Dimethylene-1,3,5-cyclohepatdiene	0	5.541	C9 H10			94.4	95.6	97.2	766	777		0			2820.5			654		5714.86	13503.1		4	#DIV/0!	1	0	0.5	0.333333	0	3	654	#VALUE!	1	#VALUE!	8.73831	20.647	#VALUE!	19872	#VALUE!	0.0329106	#VALUE!	0.287583	0.679506	#VALUE!
76	features210	Heptane, 4-azido-	27126-22-3	5.566	C7 H15 N3			96.8	99.2	100	824	840	1149	928.439		176966			1544.86		21596.9	32494.9			4	1	0	0.5	0.333333	0	0	3	1544.86	1	#VALUE!	13.9798	21.0342	#VALUE!	#VALUE!	55636.6	0.0277669	#VALUE!	0.388177	0.584056	#VALUE!	#VALUE!
77	features213	2-Methyl-4-phenyl-1,3-dioxane	34161-47-2	5.644	C11 H14 O2			99.3	97.9	100	880	962	1160	1395.81		546356	14404.5						370200		3	#DIV/0!	#DIV/0!	#DIV/0!	#DIV/0!	1	0	1	370200	#VALUE!	#VALUE!	#VALUE!	#VALUE!	1	#VALUE!	370200	#VALUE!	#VALUE!	#VALUE!	#VALUE!	1	#VALUE!
78	features215	1-Propyne, 3-phenyl-	10147-11-2	5.646	C9 H8			99	98.9	99.4	930	960	1160	966.805		199893	256322		6873.14	1645.43		95650	78511.4	5388	7	1	0.5	0	0.333333	0.25	0.2	5	1645.43	4.17711	1	#VALUE!	58.1308	47.7149	3.27453	188068	0.0365461	0.00874912	#VALUE!	0.508593	0.417463	0.0286492
79	features219	Benzene, (1,3,3-trimethylnonyl)-	54986-44-6	5.697	C18 H30			97.3	97.6	100	853	866	1166	0		4.34705e+06							3.36402e+06		2	#DIV/0!	#DIV/0!	#DIV/0!	#DIV/0!	1	0	1	3.36402e+06	#VALUE!	#VALUE!	#VALUE!	#VALUE!	1	#VALUE!	3.36402e+06	#VALUE!	#VALUE!	#VALUE!	#VALUE!	1	#VALUE!
80	features221	1,3-Benzenediol, o-(2-methylbenzoyl)-o'-(3-cyclopentylpropionyl)-	0	5.712	C22 H24 O4			97.2	98	100	846	860		0			9139		947.143			686.571	37153.4		4	1	0	0	0.5	0.333333	0	3	686.571	1.37953	#VALUE!	#VALUE!	1	54.1144	#VALUE!	38787.1	0.024419	#VALUE!	#VALUE!	0.017701	0.95788	#VALUE!
81	features222	1,2-Dineopentyldisulfane 1,1,2-trioxide	0	5.713	C10 H22 O3 S2			98	92.4	100	799	899		0					263051			401357	24032.3		3	1	0	0	0.5	0.333333	0	3	24032.3	10.9457	#VALUE!	#VALUE!	16.7007	1	#VALUE!	688440	0.382097	#VALUE!	#VALUE!	0.582995	0.0349083	#VALUE!
82	features224	2H-Indol-2-one, 1,3-dihydro-	59-48-3	5.725	C8 H7 N O			99.2	96.6	100	936	960				751536			908.857		736.571	61289.4			4	1	0	0.5	0.333333	0	0	3	736.571	1.2339	#VALUE!	1	83.2091	#VALUE!	#VALUE!	62934.9	0.0144412	#VALUE!	0.0117037	0.973855	#VALUE!	#VALUE!
83	features225	1,2-epoxy-4-propanoxy-hexane	0	5.75	C9 H16 O3			100	99.6	100	815	999		0		1.1419e+06				1242.57		434168	1420		4	#DIV/0!	1	0	0.5	0.333333	0	3	1242.57	#VALUE!	1	#VALUE!	349.411	1.14279	#VALUE!	436831	#VALUE!	0.00284452	#VALUE!	0.993905	0.00325069	#VALUE!
84	features226	(E)-4-hydroxy-2-hexenal	17427-21-3	5.766	C6 H10 O2			98.4	100	100	920	920	1173	1000.13		340044			3210.86			95906.6	1291.71		4	1	0	0	0.5	0.333333	0	3	1291.71	2.48573	#VALUE!	#VALUE!	74.2475	1	#VALUE!	100409	0.0319777	#VALUE!	#VALUE!	0.955158	0.0128645	#VALUE!
85	features229	2-Methylpyrrolizin-3-one	0	5.804	C8 H7 N O			98.7	94.7	100	758	936		0		6.07088e+06					12125.9	58646.4			3	#DIV/0!	#DIV/0!	1	0.5	0	0	2	12125.9	0	0	1	4.83648	#VALUE!	0	70772.3	0	0	0.171336	0.828664	#VALUE!	0
86	features231	Pentanediamide, N,N'-di-benzoyloxy-	0	5.818	C19 H18 N2 O6			98.3	100	100	861	916		0		2.3611e+06	7037		87250		3686.57	155379	386608	688	7	1	0	0.5	0.333333	0.25	0.2	5	688	126.817	#VALUE!	5.35839	225.842	561.93	1	633612	0.137703	#VALUE!	0.00581834	0.245228	0.610165	0.00108584
87	features235	Butanamide, 2-ethyl-N-[(phenylamino)carbonyl]-	0	5.861	C13 H18 N2 O2			97.7	95.1	100	832	883		0		114341					253.143	29751.7			3	#DIV/0!	#DIV/0!	1	0.5	0	0	2	253.143	#VALUE!	#VALUE!	1	117.529	#VALUE!	#VALUE!	30004.9	#VALUE!	#VALUE!	0.00843673	0.991563	#VALUE!	#VALUE!
88	features239	2-Methylpyrrolizin-3-one	0	5.893	C8 H7 N O			99.4	99.9	100	795	970		0							17377.4	795562	2.0755e+06	9519.43	4	#DIV/0!	#DIV/0!	1	0.5	0.333333	0.25	4	9519.43	0	0	1.82547	83.5724	218.028	1	2897960	0	0	0.00599643	0.274525	0.716194	0.00328487
89	features242	Benzene, 1-isocyano-3-methyl-	20600-54-8	5.904	C8 H7 N			99	87	100	854	950	1189	1011.19			53961					16380.3	402666	161471	4	#DIV/0!	#DIV/0!	#DIV/0!	1	0.5	0.333333	3	16380.3	#VALUE!	#VALUE!	#VALUE!	1	24.5823	9.85762	580517	#VALUE!	#VALUE!	#VALUE!	0.0282167	0.693633	0.27815
90	features246	10,12-Dibenzoyl-11-(4-nitrophenyl)pyrrolo[2,1-h][1,3,7]triazapyrene	0	5.92	C36 H20 N4 O4			99.3	98.1	100	908	963		0		1.33295e+06			20092		3686.57	155379	386608	1076.86	6	1	0	0.5	0.333333	0.25	0.2	5	1076.86	18.658	#VALUE!	3.42345	144.289	359.015	1	566843	0.0354455	#VALUE!	0.0065037	0.274113	0.682038	0.00189975
91	features248	L-talose N-methyl-N-phenylhydrazone	0	5.921	C13 H10 N2 O5			97.6	87.6	100	779	879		0								408473	2.29358e+07		2	#DIV/0!	#DIV/0!	#DIV/0!	1	0.5	0	2	408473	#VALUE!	#VALUE!	#VALUE!	1	56.1502	#VALUE!	23344292	#VALUE!	#VALUE!	#VALUE!	0.0174978	0.982502	#VALUE!
92	features251	1-(Phenoxymethyl)-4-vinyl-benzene	0	5.983	C15 H14 O			97.2	99.1	100	755	859		0		186616	114172					182475	95962.6		4	#DIV/0!	#DIV/0!	#DIV/0!	1	0.5	0	2	95962.6	#VALUE!	#VALUE!	#VALUE!	1.90152	1	#VALUE!	278437	#VALUE!	#VALUE!	#VALUE!	0.655353	0.344647	#VALUE!
93	features254	Propane, 2-ethoxy-2-methyl-	637-92-3	6.009	C6 H14 O			98.8	98.9	99.9	870	944	1201	619.656		591877						112094			2	#DIV/0!	#DIV/0!	#DIV/0!	1	0	0	1	112094	#VALUE!	0	#VALUE!	1	0	#VALUE!	112094	#VALUE!	0	#VALUE!	1	0	#VALUE!
94	features259	10,12-Dibenzoyl-11-(4-nitrophenyl)pyrrolo[2,1-h][1,3,7]triazapyrene	0	6.043	C36 H20 N4 O4			99.3	99.4	100	959	962		0		1.33295e+06	5990.5				677.429	116575	40370.6		5	#DIV/0!	#DIV/0!	1	0.5	0.333333	0	3	677.429	#VALUE!	#VALUE!	1	172.085	59.5938	#VALUE!	157623	#VALUE!	#VALUE!	0.00429777	0.739582	0.25612	#VALUE!
95	features262	Methyl (1S,2R,2'S)-(-)-1-[N-(benzyloxycarbonyl)amino]-2-(2'-hydroxy-2'-methoxycarbonyl-2'-([1S,2R,3S,4R]-2,3-isopropylidenedioxy-4-methoxycarbonylcyclopeny-1-yl)ethylaminocarbonyl]cyclopropyl-1-carbonyl-N-[(R)-2-phenylglycinate]	0	6.065	C36 H43 N3 O13			97.9	100	100	763	896		0								1.72512e+06	2.78996e+06		2	#DIV/0!	#DIV/0!	#DIV/0!	1	0.5	0	2	1.72512e+06	0	0	#VALUE!	1	1.61726	0	4.51508e+06	0	0	#VALUE!	0.382079	0.617921	0
96	features263	1,3-Cyclohexanediol, 4,4-dimethyl-, 1-acetate, (1R-cis)-	0	6.083	C10 H18 O3			97.6	95.3	100	880	880		0		91648.6	25334.5					658940	1.49116e+06		4	#DIV/0!	#DIV/0!	#DIV/0!	1	0.5	0	2	658940	#VALUE!	#VALUE!	#VALUE!	1	2.26297	#VALUE!	2.1501e+06	#VALUE!	#VALUE!	#VALUE!	0.306469	0.693531	#VALUE!
97	features270	1-(4,4-Dimethyl-2-oxazolin-2-yl)-1-phenyl-2-(pyrrolidin-1-yl)-ethanol	0	6.202	C17 H24 N2 O2			97.8	100	100	768	891		0		183057						90502.6	17846		3	#DIV/0!	#DIV/0!	#DIV/0!	1	0.5	0	2	17846	#VALUE!	#VALUE!	#VALUE!	5.07131	1	#VALUE!	108349	#VALUE!	#VALUE!	#VALUE!	0.835291	0.164709	#VALUE!
98	features271	4-Nitrophenyl-β-phenylpropionate	17895-71-5	6.207	C15 H13 N O4			98.6	93.5	100	793	930				112247	2184					41286.6	228203		4	#DIV/0!	#DIV/0!	#DIV/0!	1	0.5	0	2	41286.6	#VALUE!	#VALUE!	#VALUE!	1	5.5273	#VALUE!	269490	#VALUE!	#VALUE!	#VALUE!	0.153203	0.846797	#VALUE!
99	features273	(2S,3S)-2,4-dimethylpentane-1,3-diol	0	6.25	C7 H16 O2			90.2	92	96.5	836	920		0		46885.7						5956.86	52377.7		3	#DIV/0!	#DIV/0!	#DIV/0!	1	0.5	0	2	5956.86	#VALUE!	#VALUE!	#VALUE!	1	8.79284	#VALUE!	58334.6	#VALUE!	#VALUE!	#VALUE!	0.102115	0.897885	#VALUE!
100	features280	Carbonic acid, butyl 3-methylphenyl ester	0	6.335	C12 H16 O3			96.9	99.1	99.3	839	861					43027.5					97536	615461		3	#DIV/0!	#DIV/0!	#DIV/0!	1	0.5	0	2	97536	#VALUE!	#VALUE!	#VALUE!	1	6.31009	0	712997	#VALUE!	#VALUE!	#VALUE!	0.136797	0.863203	0
101	features285	anti-1-Phenyl-2-ethenyldecan-1-ol	0	6.377	C18 H28 O			97.6	98.3	100	780	877		0		2.51816e+07	9180295		43924.9			7.16096e+06	2.82213e+07	53860.6	6	1	0	0	0.5	0.333333	0.25	4	43924.9	1	#VALUE!	#VALUE!	163.028	642.491	1.2262	35480076	0.00123801	#VALUE!	#VALUE!	0.201831	0.795413	0.00151805
102	features286	3-Methyl-2,3-dihydrobenzofuran	0	6.379	C9 H10 O			99.1	100	100	956	956		0		24797.1	99678.5		7336.29			200821	41108.9		5	1	0	0	0.5	0.333333	0	3	7336.29	1	#VALUE!	#VALUE!	27.3737	5.6035	#VALUE!	249267	0.0294315	#VALUE!	#VALUE!	0.805649	0.164919	#VALUE!
103	features289	2-(3-Methylbut-2-enyloxy)benzaldehyde	0	6.395	C12 H14 O2			97.3	100	100	781	864		0		148021	14149						340535		3	#DIV/0!	#DIV/0!	#DIV/0!	#DIV/0!	1	0	1	340535	#VALUE!	#VALUE!	#VALUE!	#VALUE!	1	0	340535	#VALUE!	#VALUE!	#VALUE!	#VALUE!	1	0
104	features290	10,12-Dibenzoyl-11-(4-nitrophenyl)pyrrolo[2,1-h][1,3,7]triazapyrene	0	6.396	C36 H20 N4 O4			99.3	99.6	100	932	965		0		1.62307e+07	5366.5				360	893798	73766		5	#DIV/0!	#DIV/0!	1	0.5	0.333333	0	3	360	#VALUE!	#VALUE!	1	2482.77	204.906	#VALUE!	967924	#VALUE!	#VALUE!	0.00037193	0.923418	0.0762105	#VALUE!
105	features296	anti-2-Oxatricyclo[4.1.0.0(3,5)]heptane	0	6.468	C6 H8 O			98.4	89.3	99.8	813	921		0		1.15536e+06	9784.5				125578	391278	10894.3		5	#DIV/0!	#DIV/0!	1	0.5	0.333333	0	3	10894.3	#VALUE!	#VALUE!	11.527	35.9159	1	#VALUE!	527750	#VALUE!	#VALUE!	0.23795	0.741407	0.0206429	#VALUE!
106	features304	1,3-Butadiene, 1-phenyl-	0	6.551	C10 H10			99	96.1	100	902	950		0		4.01999e+06	367897					747772	1.82647e+06		4	#DIV/0!	#DIV/0!	#DIV/0!	1	0.5	0	2	747772	#VALUE!	#VALUE!	#VALUE!	1	2.44255	#VALUE!	2.57424e+06	#VALUE!	#VALUE!	#VALUE!	0.290482	0.709518	#VALUE!
107	features307	1a,6b-dihydro-1H-cyclopropa[b][1]benzofuran	0	6.562	C9 H8 O			98.8	98.6	99.4	879	948		0		7.10986e+06	3381301					2.2775e+07	5.69407e+06	26283.7	5	#DIV/0!	#DIV/0!	#DIV/0!	1	0.5	0.333333	3	26283.7	#VALUE!	#VALUE!	#VALUE!	866.507	216.639	1	2.84954e+07	#VALUE!	#VALUE!	#VALUE!	0.799253	0.199824	0.000922385
108	features308	(2,5-dimethylpyrazol-3-yl) (E)-3-phenylprop-2-enoate	0	6.573	C14 H14 N2 O2			98.3	98.7	100	753	912		0		230723	164302					58277.7	461496		4	#DIV/0!	#DIV/0!	#DIV/0!	1	0.5	0	2	58277.7	#VALUE!	#VALUE!	#VALUE!	1	7.91891	#VALUE!	519773	#VALUE!	#VALUE!	#VALUE!	0.112121	0.887879	#VALUE!
109	features309	6-(prop-2-enoxymethyl)-2-oxanone	0	6.587	C9 H14 O3			99.6	97.7	100	814	977		0		1.22416e+06			4369.14			432205	11462.9		4	1	0	0	0.5	0.333333	0	3	4369.14	1	#VALUE!	#VALUE!	98.9222	2.62359	#VALUE!	448037	0.00975174	#VALUE!	#VALUE!	0.964664	0.0255846	#VALUE!
110	features311	1,3-Butadiene, 1-phenyl-	0	6.595	C10 H10			98.9	95.4	100	813	944		0		5.5249e+06	367897					747772	1.82647e+06	177894	5	#DIV/0!	#DIV/0!	#DIV/0!	1	0.5	0.333333	3	177894	#VALUE!	#VALUE!	#VALUE!	4.20347	10.2672	1	2.75214e+06	#VALUE!	#VALUE!	#VALUE!	0.271706	0.663655	0.0646385
111	features316	1,3-Butadiene, 1-phenyl-	0	6.649	C10 H10			99.8	95.9	100	850	990		0		219440	42030					115594	298896	5027.71	5	#DIV/0!	#DIV/0!	#DIV/0!	1	0.5	0.333333	3	5027.71	#VALUE!	#VALUE!	#VALUE!	22.9914	59.4496	1	419518	#VALUE!	#VALUE!	#VALUE!	0.275541	0.712475	0.0119845
112	features318	Phenol, 4-ethyl-	123-07-9	6.665	C8 H10 O			97.1	92.5	100	804	853				3.70526e+06	480786					7.07874e+06	7.77146e+06	3966.86	5	#DIV/0!	#DIV/0!	#DIV/0!	1	0.5	0.333333	3	3966.86	#VALUE!	#VALUE!	#VALUE!	1784.47	1959.1	1	1.48542e+07	#VALUE!	#VALUE!	#VALUE!	0.476549	0.523184	0.000267053
113	features322	1,4-Bis[2-(1-methylethenyl)anilido]benzene	0	6.68	C26 H24 N2 O2			99	100	100	867	950		0		4.78901e+06	498.5						2.11888e+06	6882.86	4	#DIV/0!	#DIV/0!	#DIV/0!	#DIV/0!	1	0.5	2	6882.86	0	#VALUE!	#VALUE!	#VALUE!	307.849	1	2125766	0	#VALUE!	#VALUE!	#VALUE!	0.996762	0.00323782
114	features335	[5(R),8(R)]-4,4-Ethylidenedioxy-5,6,8-trimethyltricyclo[6.3.0.0(1,5)]undecan-7-one	0	6.768	C16 H24 O3			98.8	100	100	827	941		0		2.15833e+07			26862.6	30688.6		1.51309e+07			4	1	0.5	0	0.333333	0	0	3	26862.6	1	1.14243	#VALUE!	563.27	#VALUE!	#VALUE!	1.51884e+07	0.00176862	0.00202052	#VALUE!	0.996211	#VALUE!	#VALUE!
115	features339	1-Methyl-2- (1-methylprop-2-en-1-yl)benzene	0	6.801	C11 H14			99.5	88	100	846	975		0		23875.7	28270		3114.57			3513.71	147678		5	1	0	0	0.5	0.333333	0	3	3114.57	1	#VALUE!	#VALUE!	1.12815	47.4151	#VALUE!	154306	0.0201844	#VALUE!	#VALUE!	0.0227711	0.957045	#VALUE!
116	features348	1-(o-Hydroxyphenyl)-2-propen-1-ol	0	6.838	C9 H10 O2			98.2	92.2	100	863	908		0		612265	247809		2077.57		28831	952483	420492		6	1	0	0.5	0.333333	0.25	0	4	2077.57	1	#VALUE!	13.8773	458.46	202.396	#VALUE!	1.40388e+06	0.00147987	#VALUE!	0.0205366	0.678463	0.29952	#VALUE!
117	features352	2-Methyl-3-phenyloxetan-3-ol	0	6.878	C10 H12 O2			99.6	90.8	100	908	977		0		523066						315178	796607		3	#DIV/0!	#DIV/0!	#DIV/0!	1	0.5	0	2	315178	#VALUE!	#VALUE!	#VALUE!	1	2.52748	#VALUE!	1.11178e+06	#VALUE!	#VALUE!	#VALUE!	0.283488	0.716512	#VALUE!
118	features361	2-Propyl-2,3-dihydropyran-6-one	0	6.97	C8 H12 O2			96.4	89.4	100	757	819		0		124590	1693		4434.57			102041	204316		5	1	0	0	0.5	0.333333	0	3	4434.57	1	#VALUE!	#VALUE!	23.0104	46.0734	#VALUE!	310792	0.0142686	#VALUE!	#VALUE!	0.328326	0.657405	#VALUE!
119	features373	[1aα,6β(S*),6aα]-3,4-Dihydro-4-(1,1a,6,6a-tetrahydro-6-hydroxycycloprop[a]inden-6-yl)-1(2H)-naphthalenone	0	7.032	C20 H18 O2			96.9	90.6	97.5	860	894		0			6548.5			14563.9	41668.4	98251.9	125305	12645.6	6	#DIV/0!	1	0.5	0.333333	0.25	0.2	5	12645.6	#VALUE!	1.1517	3.2951	7.76967	9.90898	1	292434	#VALUE!	0.0498021	0.142488	0.335979	0.428488	0.0432424
120	features379	Ethyl (-)-(5S)-5,6-Epoxyhexanoate	0	7.068	C8 H14 O3			96.9	93.7	100	809	846		0					91967.4	37461.1	512339	2.47067e+06			4	1	0.5	0.333333	0.25	0	0	4	37461.1	2.45501	1	13.6765	65.9528	#VALUE!	#VALUE!	3.11243e+06	0.0295484	0.012036	0.16461	0.793805	#VALUE!	#VALUE!
121	features382	(-)-3-ethyloctan-4-ol	0	7.09	C10 H22 O			99.7	88.2	100	800	985		0		1.4724e+06	982					633268			3	#DIV/0!	#DIV/0!	#DIV/0!	1	0	0	1	633268	#VALUE!	#VALUE!	#VALUE!	1	#VALUE!	#VALUE!	633268	#VALUE!	#VALUE!	#VALUE!	1	#VALUE!	#VALUE!
122	features387	4a,8a-(Methaniminomethano)naphthalene-9,11-dione, 10-phenyl-	69915-10-2	7.134	C18 H13 N O2			95.6	93.4	100	780	780	1342	0		196450						42240.4			2	#DIV/0!	#DIV/0!	#DIV/0!	1	0	0	1	42240.4	#VALUE!	0	0	1	#VALUE!	#VALUE!	42240.4	#VALUE!	0	0	1	#VALUE!	#VALUE!
123	features389	rel-(1S,4aR,8aR)-1,5,6,7,8,8a-hexahydro-2H-1,4a-(epoxymethano)naphthalen-9-one	0	7.137	C11 H14 O2			99.8	98.3	100	957	991		0		694391	219254					11129984	1.81403e+06		4	#DIV/0!	#DIV/0!	#DIV/0!	1	0.5	0	2	1.81403e+06	#VALUE!	#VALUE!	#VALUE!	6.13549	1	#VALUE!	1.2944e+07	#VALUE!	#VALUE!	#VALUE!	0.859855	0.140145	#VALUE!
124	features391	(S)-(-)-6-Benzoyloxy-7-oxoheptyl pivalate	0	7.141	C19 H26 O5			99.6	99.1	100	821	979		0		770728				11073.6	4147.57	225172	33242.1		5	#DIV/0!	1	0.5	0.333333	0.25	0	4	4147.57	0	2.66989	1	54.2901	8.01485	0	273635	0	0.0404683	0.0151573	0.822891	0.121483	0
125	features392	Butanoic acid, 2-hydroxy-, methyl ester	29674-47-3	7.147	C5 H10 O3			98.4	91.8	100	799	919	1344	844.631		1.4724e+06	988.5					92339.7			3	#DIV/0!	#DIV/0!	#DIV/0!	1	0	0	1	92339.7	#VALUE!	#VALUE!	#VALUE!	1	#VALUE!	#VALUE!	92339.7	#VALUE!	#VALUE!	#VALUE!	1	#VALUE!	#VALUE!
126	features403	5,8-Epoxy-1H-benzocycloheptene, 2,3,5,8-tetrahydro-8-methyl-	0	7.281	C12 H14 O			97.7	92	100	847	885		0			10302		2132			15586		3303.71	4	1	0	0	0.5	0	0.333333	3	2132	1	#VALUE!	#VALUE!	7.31051	#VALUE!	1.54958	21021.7	0.101419	#VALUE!	#VALUE!	0.741424	#VALUE!	0.157157
127	features406	Phenol, 2-propyl-	644-35-9	7.301	C9 H12 O			99	90.4	100	800	950	1365	1209.87		6.44645e+06	11495				12893.7	2.42174e+06	2.69027e+07	2096.29	6	#DIV/0!	#DIV/0!	1	0.5	0.333333	0.25	4	2096.29	#VALUE!	#VALUE!	6.15074	1155.25	12833.5	1	2.93394e+07	#VALUE!	#VALUE!	0.000439467	0.0825423	0.916947	7.14494e-05
128	features412	Bicyclo[3.2.0]hepta-3,6-dien-2-one, 5-(1-methylethyl)-	110087-13-3	7.327	C10 H12 O			97	96.6	100	810	848	1367	1227.08		82068.6	53142		9684		1200.29	252173	126413		6	1	0	0.5	0.333333	0.25	0	4	1200.29	8.06808	#VALUE!	1	210.095	105.319	#VALUE!	389470	0.0248645	#VALUE!	0.00308184	0.647478	0.324576	#VALUE!
129	features414	(1S,2R)-3-(2-methylallyl)cyclohexa-3,5-diene-1,2-diol	0	7.345	C10 H14 O2			98.2	99.1	100	909	909		0		82068.6	53142		9684		470.286	252173	126413		6	1	0	0.5	0.333333	0.25	0	4	470.286	20.5917	#VALUE!	1	536.213	268.8	#VALUE!	388740	0.0249112	#VALUE!	0.00120977	0.648694	0.325185	#VALUE!
130	features420	4-Methoxy-1-pentene	98386-09-5	7.361	C6 H12 O			98.1	88.5	100	758	902	1081	0		78308.6						29125.1			2	#DIV/0!	#DIV/0!	#DIV/0!	1	0	0	1	29125.1	#VALUE!	#VALUE!	#VALUE!	1	#VALUE!	0	29125.1	#VALUE!	#VALUE!	#VALUE!	1	#VALUE!	0
131	features437	4-(2'-Hydroxyphenyl)-2-methyl-3-buten-2-ol	0	7.438	C11 H14 O2			98.7	97.9	99.5	764	944		0		233881	47455		2360		477.714	401497	623599		6	1	0	0.5	0.333333	0.25	0	4	477.714	4.94019	#VALUE!	1	840.455	1305.38	#VALUE!	1027934	0.00229587	#VALUE!	0.000464732	0.390587	0.606653	#VALUE!
132	features439	3-Methyl-1-phenyl-2-buten-1-ol	0	7.458	C11 H14 O			98.7	82.3	100	818	932		0		743277	10038.5		3794	2937.43		275313			5	1	0.5	0	0.333333	0	0	3	2937.43	1.29161	1	#VALUE!	93.7257	#VALUE!	#VALUE!	282044	0.0134518	0.0104148	#VALUE!	0.976133	#VALUE!	#VALUE!
133	features440	[(3S)-5,5-dimethyl-3-oxolanyl]methanol	0	7.467	C7 H14 O2			99.5	89.3	100	841	973		0		556178				6337.71	64408				3	#DIV/0!	1	0.5	0	0	0	2	6337.71	0	1	10.1627	#VALUE!	#VALUE!	#VALUE!	70745.7	0	0.0895844	0.910416	#VALUE!	#VALUE!	#VALUE!
134	features444	5-Propyl-2,3-dihydro-1H-indene	0	7.498	C12 H16			99.7	80.9	100	803	986		0		25028.6			5194			26298.9	23504.3		4	1	0	0	0.5	0.333333	0	3	5194	1	#VALUE!	#VALUE!	5.06331	4.52528	#VALUE!	54997.1	0.0944413	#VALUE!	#VALUE!	0.478186	0.427373	#VALUE!
135	features445	(2Z,6R*)-6,7epoxy-3,7-dimethyl-2-octen-1-o	0	7.507	C10 H18 O2			99.6	95.9	100	844	978		0					511849				19406.9		2	1	0	0	0	0.5	0	2	19406.9	26.3747	#VALUE!	#VALUE!	#VALUE!	1	#VALUE!	531256	0.96347	#VALUE!	#VALUE!	#VALUE!	0.0365301	#VALUE!
136	features461	Cyclohexene 3-(tert-butyl)peroxide	51437-25-3	7.618	C10 H18 O2			99.3	92.2	100	866	962	1407	0		441719			432595			75859.1			3	1	0	0	0.5	0	0	2	75859.1	5.7026	#VALUE!	#VALUE!	1	#VALUE!	#VALUE!	508454	0.850804	#VALUE!	#VALUE!	0.149196	#VALUE!	#VALUE!
137	features478	1,1,8-Trimethylspiro[2.6]nona-6,8-dien-5-one	0	7.745	C12 H16 O			99.2	99.5	100	955	958		0		72111.4	4645				443.429	148653	174809		5	#DIV/0!	#DIV/0!	1	0.5	0.333333	0	3	443.429	#VALUE!	#VALUE!	1	335.235	394.22	#VALUE!	323905	#VALUE!	#VALUE!	0.00136901	0.458939	0.539692	#VALUE!
138	features480	1,2-Benzenediol, O-(4-ethylbenzoyl)-O'-propargyloxycarbonyl-	0	7.798	C19 H16 O5			96.4	97.5	97.2	818	876		0		341209	12263.5					235907	204873		4	#DIV/0!	#DIV/0!	#DIV/0!	1	0.5	0	2	204873	#VALUE!	#VALUE!	#VALUE!	1.15148	1	#VALUE!	440779	#VALUE!	#VALUE!	#VALUE!	0.535204	0.464796	#VALUE!
139	features486	4-Methoxybut-1-ynylbenzene	0	7.833	C11 H12 O			98.3	95.4	100	890	913		0		867800	239705					308466	2.74797e+06	16967.4	5	#DIV/0!	#DIV/0!	#DIV/0!	1	0.5	0.333333	3	16967.4	#VALUE!	#VALUE!	#VALUE!	18.1799	161.956	1	3.0734e+06	#VALUE!	#VALUE!	#VALUE!	0.100366	0.894113	0.00552073
140	features498	(R*,S*,R*)-2a,3-Dimethyl-1,2,2a,3-tetrahydro-8bH-cyclobuta[c]chromen-8b-ol	0	7.926	C13 H16 O2			97.2	98.9	100	768	858		0		98796.7						493717	303038		3	#DIV/0!	#DIV/0!	#DIV/0!	1	0.5	0	2	303038	0	#VALUE!	#VALUE!	1.62923	1	#VALUE!	796755	0	#VALUE!	#VALUE!	0.61966	0.38034	#VALUE!
141	features501	1-Phenyl-2-cyclopropylacetylene	0	7.937	C11 H10			98.3	94.2	100	841	912		0		8.07103e+06	218868		176355			489567	3.62019e+06	990323	6	1	0	0	0.5	0.333333	0.25	4	176355	1	#VALUE!	#VALUE!	2.77604	20.5279	5.61552	5.27643e+06	0.0334231	#VALUE!	#VALUE!	0.0927837	0.686105	0.187688
142	features512	cis-2,6-Dimethoxy-3,4-dihydropyran	0	7.987	C7 H12 O3			97.9	97.2	100	825	896		0		1.31839e+06						337865	11718		3	#DIV/0!	#DIV/0!	#DIV/0!	1	0.5	0	2	11718	#VALUE!	#VALUE!	#VALUE!	28.833	1	#VALUE!	349583	#VALUE!	#VALUE!	#VALUE!	0.96648	0.03352	#VALUE!
143	features518	3-Methyl-2,3-dihydrobenzofuran	0	8.03	C9 H10 O			99.2	98.8	99.8	821	962		0					49254.2			1.80469e+06	1.47678e+06		3	1	0	0	0.5	0.333333	0	3	49254.2	1	0	0	36.6403	29.9829	0	3.33073e+06	0.0147878	0	0	0.541831	0.443382	0
144	features519	3-(Hydroxyphenyl)pentane	0	8.046	C11 H16 O			99.5	96.5	100	973	973		0		72157.1	7117					17713.4	74342.9		4	#DIV/0!	#DIV/0!	#DIV/0!	1	0.5	0	2	17713.4	#VALUE!	#VALUE!	#VALUE!	1	4.19698	#VALUE!	92056.3	#VALUE!	#VALUE!	#VALUE!	0.19242	0.80758	#VALUE!
145	features524	1-Methylethyl-2-yl 4-(2,3-Dihydro-2-hydroxy-1,3-dioxo-1H-inden-2-yl)-5-hydroxy-1-phenyl-1H-pyrazole-3-carboxylate	0	8.079	C22 H18 N2 O6			98.9	100	100	777	946		0		878948	1878					184972	160800		4	#DIV/0!	#DIV/0!	#DIV/0!	1	0.5	0	2	160800	#VALUE!	0	0	1.15032	1	#VALUE!	345772	#VALUE!	0	0	0.534953	0.465047	#VALUE!
146	features530	Benzene, 2,4-diisocyanato-1-methyl-	584-84-9	8.11	C9 H6 N2 O2			96.3	99.4	99.5	825	827				5.36433e+07					1.26445e+07	1.09408e+06	82777.6		4	#DIV/0!	#DIV/0!	1	0.5	0.333333	0	3	82777.6	#VALUE!	0	152.752	13.2171	1	0	1.38213e+07	#VALUE!	0	0.914852	0.0791585	0.00598912	0
147	features538	4-Vinyl-2H-chromene	0	8.149	C11 H10 O			99.3	91.9	99.2	931	982		0					7591.14	1141.14	23362		3.25741e+06		4	1	0.5	0.333333	0	0.25	0	4	1141.14	6.65223	1	20.4725	#VALUE!	2854.52	#VALUE!	3.28951e+06	0.00230768	0.000346904	0.00710198	#VALUE!	0.990243	#VALUE!
148	features555	(2,5-dimethylpyrazol-3-yl) (E)-3-phenylprop-2-enoate	0	8.249	C14 H14 N2 O2			97.5	99.5	100	825	873		0		854434	2573.5		19183.4		1060.57		1738.86	1348	6	1	0	0.5	0	0.333333	0.25	4	1060.57	18.0878	#VALUE!	1	#VALUE!	1.63955	1.27101	23330.9	0.822234	#VALUE!	0.0454579	#VALUE!	0.0745304	0.0577776
149	features556	4-(3,3-dimethylbut-1-ynyl)phenol	0	8.249	C12 H14 O			98.5	93.7	100	757	925		0		8724.29	60289				221.714	192221	773256		5	#DIV/0!	#DIV/0!	1	0.5	0.333333	0	3	221.714	#VALUE!	#VALUE!	1	866.977	3487.62	#VALUE!	965699	#VALUE!	#VALUE!	0.000229589	0.199049	0.800722	#VALUE!
150	features563	3-Hexen-1-ol	544-12-7	8.282	C6 H12 O			96.3	84.9	96	774	892				122779			26487.7			12693.1	730.571		4	1	0	0	0.5	0.333333	0	3	730.571	36.2562	#VALUE!	#VALUE!	17.3743	1	#VALUE!	39911.4	0.663662	#VALUE!	#VALUE!	0.318033	0.0183048	#VALUE!
151	features567	[(3S)-5,5-dimethyl-3-oxolanyl]methanol	0	8.294	C7 H14 O2			99.5	99.7	100	970	976		0		2163050			1392.29			538256	5172.86		4	1	0	0	0.5	0.333333	0	3	1392.29	1	#VALUE!	#VALUE!	386.599	3.71537	#VALUE!	544821	0.00255549	#VALUE!	#VALUE!	0.98795	0.00949459	#VALUE!
152	features583	1-(1,2-Dihydroacenaphthylene-1-yl)cyclohexanol	0	8.378	C18 H20 O			97.9	97.3	99.3	818	909		0		4991500	15970.5		3173.71			34588.3	1.55521e+06	79776	6	1	0	0	0.5	0.333333	0.25	4	3173.71	1	#VALUE!	0	10.8984	490.028	25.1365	1.67275e+06	0.00189731	#VALUE!	0	0.0206776	0.929733	0.0476916
153	features597	(1'S,2'R,4'R,5'S,9S)spiro[4-(Amidoxymethyl)-5-(diphenylmethyloxycarbonyl)-2-thiabicyclo[4.2.0]octan-7-one-8,2'-4'-(2'-methoxyphenyl)-7'-phenyl-3',7'-diazabicyclo[3.3.0]octane-6',8'-dione]	0	8.419	C41 H35 N3 O8 S			97.5	94.5	100	752	876		0		73376.3	2240.5		18090.3				4241.43		4	1	0	0	0	0.5	0	2	4241.43	4.26514	#VALUE!	#VALUE!	#VALUE!	1	#VALUE!	22331.7	0.810072	#VALUE!	#VALUE!	#VALUE!	0.189928	#VALUE!
154	features614	Cyclobutane, 1,2-di-3-buten-1-ynyl-, trans-	0	8.499	C12 H12			99	93.9	100	902	949		0		2.99434e+06	35109.5					245045	1.16505e+06		4	#DIV/0!	#DIV/0!	#DIV/0!	1	0.5	0	2	245045	#VALUE!	#VALUE!	#VALUE!	1	4.75442	#VALUE!	1.41009e+06	#VALUE!	#VALUE!	#VALUE!	0.17378	0.82622	#VALUE!
155	features632	1,1-Dimethylethyl (E)-hexenoate	0	8.552	C10 H18 O2			99.6	98.3	100	754	979		0		192816			6386.86		2748.29				3	1	0	0.5	0	0	0	2	2748.29	2.32394	#VALUE!	1	#VALUE!	#VALUE!	#VALUE!	9135.14	0.699152	#VALUE!	0.300848	#VALUE!	#VALUE!	#VALUE!
156	features636	(1S,2S,5R,S.xi.)-2-Isopropyl-5-methylcyclohexyl phthalimidomethyl sulfoxide	0	8.576	C19 H25 N O3 S			98.9	100	100	866	945		0		60544.3	1940					17495.1	42907.4		4	#DIV/0!	#DIV/0!	#DIV/0!	1	0.5	0	2	17495.1	#VALUE!	#VALUE!	#VALUE!	1	2.45253	#VALUE!	60402.6	#VALUE!	#VALUE!	#VALUE!	0.289642	0.710358	#VALUE!
157	features653	6H-Benzo[3,4]cyclobuta[1,2]cycloheptene, 7,8-dihydro-	0	8.687	C13 H12			99.2	94.2	100	927	957		0		3.41767e+06	4156.5		2428.14	8101		120221	1.56901e+06	256448	7	1	0.5	0	0.333333	0.25	0.2	5	2428.14	1	3.33629	0	49.5114	646.175	105.615	1.9562e+06	0.00124125	0.00414119	0	0.0614562	0.802067	0.131095
158	features659	(Z)-ethyl methyl(1-vinyl-1,6,7,8-tetrahydrocyclohepta[b]pyrrol-7-yl)carbamate	0	8.716	C15 H20 N2 O2			96.7	95	100	811	834		0		854060	7789		44388			17098.3	470355	22273.4	6	1	0	0	0.5	0.333333	0.25	4	17098.3	2.59605	#VALUE!	#VALUE!	1	27.5089	1.30267	554115	0.0801062	#VALUE!	#VALUE!	0.030857	0.84884	0.0401964
159	features664	(trans-2-Ethoxycyclopropyl)ethynylbenzene	0	8.725	C13 H14 O			98.8	91.3	100	784	939		0		3.6466e+06	15867		21167.1	36257.1		131466	348959		6	1	0.5	0	0.333333	0.25	0	4	21167.1	1	1.7129	#VALUE!	6.21084	16.4859	#VALUE!	537849	0.0393551	0.0674113	#VALUE!	0.244428	0.648805	#VALUE!
160	features674	4-Heptyn-3-one	32398-68-8	8.758	C7 H10 O			97.9	100	100	885	895	1573	896.071		107173	2647.5		9775.14	22906.6				662	5	1	0.5	0	0	0	0.333333	3	662	14.7661	34.6021	#VALUE!	#VALUE!	#VALUE!	1	33343.7	0.293163	0.686983	#VALUE!	#VALUE!	#VALUE!	0.0198538
161	features694	4-(2-Methyl-2-oxanyl)phenol	0	8.878	C12 H16 O2			99.6	97.9	100	938	981		0		24098.6			4177.43	1131.14	1429.43	35856.9	25214		6	1	0.5	0.333333	0.25	0.2	0	5	1131.14	3.6931	1	1.2637	31.6997	22.2907	#VALUE!	67808.9	0.0616059	0.0166813	0.0210803	0.528793	0.371839	#VALUE!
162	features696	(2R,3S,4S)-5-Benzyloxymethoxy-4-methyl-2-vinylpentan-1,3-diol	0	8.89	C16 H24 O4			96.3	100	100	760	812		0		607603			87299.7			269750			3	1	0	0	0.5	0	0	2	87299.7	1	#VALUE!	#VALUE!	3.08993	#VALUE!	#VALUE!	357049	0.244503	#VALUE!	#VALUE!	0.755497	#VALUE!	#VALUE!
163	features697	A-130	10387-50-5	8.896	C14 H14 O3			97.3	95.7	100	845	864				4.08832e+06			7676.29			1.3344e+06	448963		4	1	0	0	0.5	0.333333	0	3	7676.29	1	#VALUE!	#VALUE!	173.834	58.487	#VALUE!	1.79104e+06	0.00428594	#VALUE!	#VALUE!	0.745042	0.250672	#VALUE!
164	features698	Prop-3-yn-1-yl(4-tert-butylphenyl) ether	0	8.899	C13 H16 O			99.4	94.9	100	794	967		0		25787						49518.1	104258		3	#DIV/0!	#DIV/0!	#DIV/0!	1	0.5	0	2	49518.1	0	0	0	1	2.10545	#VALUE!	153776	0	0	0	0.322015	0.677985	#VALUE!
165	features701	Dodecane, 2,5-dimethyl-	56292-65-0	8.913	C14 H30			99.3	100	100	819	963	1597	1319.82		27211.4			36073.4						2	1	0	0	0	0	0	1	36073.4	1	0	#VALUE!	0	0	#VALUE!	36073.4	1	0	#VALUE!	0	0	#VALUE!
166	features704	(R)-Octan-2-yl (S)-octan-2-yl carbanate	0	8.925	C17 H34 O3			98.9	95.8	100	861	945		0					229281			1.88643e+06	19977.7		3	1	0	0	0.5	0.333333	0	3	19977.7	11.4769	#VALUE!	#VALUE!	94.4268	1	#VALUE!	2.13569e+06	0.107357	#VALUE!	#VALUE!	0.883289	0.00935422	#VALUE!
167	features709	Benzene, 1-methoxy-4-(1,2,6,6-tetramethyl-2-cyclohexen-1-yl)-	0	8.944	C17 H24 O			98.7	95.6	100	844	933		0		15917						49348.1	336132		3	#DIV/0!	#DIV/0!	#DIV/0!	1	0.5	0	2	49348.1	0	#VALUE!	0	1	6.81144	#VALUE!	385480	0	#VALUE!	0	0.128017	0.871983	#VALUE!
168	features738	6H-Benzo[3,4]cyclobuta[1,2]cycloheptene, 7,8-dihydro-	0	9.082	C13 H12			98.7	86.4	100	853	932		0			9198.5		367935			31706.8	74841.6	5154.21	5	1	0	0	0.5	0.333333	0.25	4	5154.21	71.3852	0	#VALUE!	6.15162	14.5205	1	479637	0.76711	0	#VALUE!	0.0661057	0.156038	0.0107461
169	features750	cis-(6-Methylcyclohexa-1,4-dien-3-yl)phosphonic Acid Bis(N,N-diethylamide)	0	9.155	C15 H29 N2 O P			99	95.7	100	843	949		0		28944.1	139782		223925			67961	67419.9		5	1	0	0	0.5	0.333333	0	3	67419.9	3.32136	0	0	1.00803	1	0	359306	0.623216	0	0	0.189145	0.187639	0
170	features756	Isophthalic acid, 3,5-difluorophenyl hexyl ester	0	9.188	C20 H20 F2 O4			96.4	88.2	93.5	796	947				55792.6						27986.9	43693.4		3	#DIV/0!	#DIV/0!	#DIV/0!	1	0.5	0	2	27986.9	#VALUE!	#VALUE!	#VALUE!	1	1.56121	#VALUE!	71680.3	#VALUE!	#VALUE!	#VALUE!	0.39044	0.60956	#VALUE!
171	features761	1H-Pyrrole, 1-(4-methylphenyl)-	827-60-1	9.209	C11 H11 N			97	84.9	100	801	851	1644	1340.46		5.70408e+06			16561.4	831.714		300401	3.19567e+06		5	1	0.5	0	0.333333	0.25	0	4	831.714	19.9124	1	#VALUE!	361.183	3842.26	#VALUE!	3.51346e+06	0.00471371	0.000236722	#VALUE!	0.0855	0.90955	#VALUE!
172	features764	4-Methyl-2-phenylpent-1-en-3-one	0	9.217	C12 H14 O			99.7	95	100	774	983		0		31527	3303		1912.71			362141	8054.43		5	1	0	0	0.5	0.333333	0	3	1912.71	1	0	0	189.334	4.21099	#VALUE!	372108	0.00514021	0	0	0.973214	0.0216454	#VALUE!
173	features783	3-Benzyl-2,3-dihydro-1H-benz[e]indene	0	9.298	C20 H18			98.4	92.9	100	754	918		0									93979.4	17423.7	2	#DIV/0!	#DIV/0!	#DIV/0!	#DIV/0!	1	0.5	2	17423.7	0	0	#VALUE!	0	5.39377	1	111403	0	0	#VALUE!	0	0.843598	0.156402
174	features798	Benzene, 1,1'-(4-pentenylidene)bis-	0	9.365	C17 H18			98.5	100	100	842	925		0		832276	898554					28048	969283	64380.3	5	#DIV/0!	#DIV/0!	#DIV/0!	1	0.5	0.333333	3	28048	#VALUE!	#VALUE!	#VALUE!	1	34.558	2.29536	1.06171e+06	#VALUE!	#VALUE!	#VALUE!	0.0264177	0.912944	0.0606382
175	features804	6-Methylhomofulvene	0	9.382	C8 H10			96.5	92	100	754	824		0		1.17596e+06			1.46195e+06	31661.4			23166.3		4	1	0.5	0	0	0.333333	0	3	23166.3	63.107	1.3667	#VALUE!	#VALUE!	1	#VALUE!	1.51678e+06	0.963853	0.0208741	#VALUE!	#VALUE!	0.0152733	#VALUE!
176	features812	1-Carbethoxy-2-α-cumyl-4-methylsemicarbazide	0	9.394	C14 H21 N3 O3			96.8	100	100	799	841		0		558964			465534			29050.3	38038		4	1	0	0	0.5	0.333333	0	3	29050.3	16.0251	#VALUE!	#VALUE!	1	1.30938	#VALUE!	532622	0.874041	#VALUE!	#VALUE!	0.054542	0.0714165	#VALUE!
177	features816	Tricyclo[2.2.1.0(2,6)]heptane-1-ethanol, 7-methoxy-	0	9.4	C10 H16 O2			98.8	89.6	100	823	938		0		152717				1934.57		58019.4	27054.9		4	#DIV/0!	1	0	0.5	0.333333	0	3	1934.57	#VALUE!	1	#VALUE!	29.9908	13.9849	#VALUE!	87008.9	#VALUE!	0.0222342	#VALUE!	0.666822	0.310944	#VALUE!
178	features817	1,4:5,8-Diepoxynaphthalene-2-carboxylic acid, 1,4,4a,5,8,8a-hexahydro-1,4,5,8-tetramethyl-, ethyl ester, (1α,4α,4aβ,5β,8β,8aβ)-	0	9.403	C17 H22 O4			99.1	94.8	100	800	953		0		1.41771e+06						598463	1.37938e+06		3	#DIV/0!	#DIV/0!	#DIV/0!	1	0.5	0	2	598463	#VALUE!	0	#VALUE!	1	2.30487	#VALUE!	1.97784e+06	#VALUE!	0	#VALUE!	0.302584	0.697416	#VALUE!
179	features822	Ethyl trans-4-methyltetrahydro-5-oxo-2-furancarboxylate	0	9.448	C8 H12 O4			99.3	91.8	98.4	885	997		0		292215						84362			2	#DIV/0!	#DIV/0!	#DIV/0!	1	0	0	1	84362	#VALUE!	0	#VALUE!	1	#VALUE!	#VALUE!	84362	#VALUE!	0	#VALUE!	1	#VALUE!	#VALUE!
180	features836	Sebacic acid, ethyl 4-phenylphenyl ester	0	9.513	C24 H30 O4			97.5	92.9	100	828	874				23782						8016	49934.3		3	#DIV/0!	#DIV/0!	#DIV/0!	1	0.5	0	2	8016	0	#VALUE!	#VALUE!	1	6.22933	0	57950.3	0	#VALUE!	#VALUE!	0.138325	0.861675	0
181	features837	(2R)-3,3-dimethylbutane-1,2-diol	0	9.518	C6 H14 O2			98.9	91.2	100	812	945		0		861993							156847	1000	3	#DIV/0!	#DIV/0!	#DIV/0!	#DIV/0!	1	0.5	2	1000	#VALUE!	#VALUE!	#VALUE!	#VALUE!	156.847	1	157847	#VALUE!	#VALUE!	#VALUE!	#VALUE!	0.993665	0.00633523
182	features838	4-Methyl-1-nitromethylnaphthalene	0	9.518	C12 H11 N O2			96.5	90.4	100	767	824		0					19213.4			15355.1	30660		3	1	0	0	0.5	0.333333	0	3	15355.1	1.25127	#VALUE!	#VALUE!	1	1.99673	#VALUE!	65228.6	0.294555	#VALUE!	#VALUE!	0.235405	0.470039	#VALUE!
183	features846	2-Nonyloxytetrahydropyran	0	9.542	C14 H28 O2			97.5	91.5	100	783	873		0		56524.3			118051			7287.43	6444		4	1	0	0	0.5	0.333333	0	3	6444	18.3196	#VALUE!	#VALUE!	1.13089	1	#VALUE!	131783	0.895803	#VALUE!	#VALUE!	0.0552988	0.0488986	#VALUE!
184	features849	2,6,10 - trimethyl - tridecane (without stereochemistry)	0	9.544	C16 H34			99	98.8	100	854	951		0		708034	70783.5		2.05157e+06			542828	664657		5	1	0	0	0.5	0.333333	0	3	542828	3.77942	#VALUE!	#VALUE!	1	1.22443	#VALUE!	3.25906e+06	0.629499	#VALUE!	#VALUE!	0.16656	0.203942	#VALUE!
185	features865	2-Nonynoic acid	1846-70-4	9.583	C9 H14 O2			99.4	93.2	100	824	969	1703	1327.27		330128			54732.6						2	1	0	0	0	0	0	1	54732.6	1	#VALUE!	#VALUE!	#VALUE!	#VALUE!	#VALUE!	54732.6	1	#VALUE!	#VALUE!	#VALUE!	#VALUE!	#VALUE!
186	features866	2,4-Dimethylpentanoic acid 3-methylbutyl ester	0	9.588	C12 H24 O2			95.8	97.2	100	766	787		0		626441	34895		510106				187897		4	1	0	0	0	0.5	0	2	187897	2.71481	#VALUE!	#VALUE!	#VALUE!	1	#VALUE!	698003	0.730807	#VALUE!	#VALUE!	#VALUE!	0.269193	#VALUE!
187	features877	Cyclobutane(1,6)spiro(2,3-diazabicyclo[3.1.0]hex-2-ene)-4-spirocyclopropane	176172-15-9	9.634	C9 H12 N2			92.4	98.9	88.7	844	844	1713	0		2.5453e+06			368009						2	1	0	0	0	0	0	1	368009	1	#VALUE!	#VALUE!	#VALUE!	#VALUE!	#VALUE!	368009	1	#VALUE!	#VALUE!	#VALUE!	#VALUE!	#VALUE!
188	features887	2H-Benz[e]indene, 3,3a,4,5-tetrahydro-3a-methyl-	61067-21-8	9.691	C14 H16			99.7	92.6	100	759	985	1722	1559.44		1.66804e+06						420204	83356.9		3	#DIV/0!	#DIV/0!	#DIV/0!	1	0.5	0	2	83356.9	#VALUE!	#VALUE!	#VALUE!	5.04103	1	#VALUE!	503561	#VALUE!	#VALUE!	#VALUE!	0.834465	0.165535	#VALUE!
189	features891	Di(cyclohex-3-enyl] ketone	0	9.709	C13 H18 O			98.7	94.8	99	909	952		0		226893						78584.4			2	#DIV/0!	#DIV/0!	#DIV/0!	1	0	0	1	78584.4	#VALUE!	0	#VALUE!	1	#VALUE!	0	78584.4	#VALUE!	0	#VALUE!	1	#VALUE!	0
190	features902	1-Acetoxy-6a-methyl-1,1a-dihydrocycloprop[a]inden-6(6aH)-one	0	9.761	C13 H12 O3			98.5	96.4	100	873	923		0		5.70526e+06				1428		891271	625550		4	#DIV/0!	1	0	0.5	0.333333	0	3	1428	#VALUE!	1	#VALUE!	624.14	438.06	#VALUE!	1.51825e+06	#VALUE!	0.000940557	#VALUE!	0.587039	0.412021	#VALUE!
191	features903	1,2-Benzenediol, O-acetoxyacetyl-O'-(4-butylbenzoyl)-	0	9.765	C21 H22 O6			97.6	96.3	98.1	837	919		0		75117.1			75594.3			4569.71	1472.29		4	1	0	0	0.5	0.333333	0	3	1472.29	51.3448	#VALUE!	#VALUE!	3.10382	1	#VALUE!	81636.3	0.925989	#VALUE!	#VALUE!	0.0559765	0.0180347	#VALUE!
192	features909	Benzene, (1-butylheptyl)-	4537-15-9	9.789	C17 H28			97.5	99.9	99.9	877	877				348530			137591	20402.9					3	1	0.5	0	0	0	0	2	20402.9	6.74372	1	#VALUE!	0	#VALUE!	#VALUE!	157994	0.870863	0.129137	#VALUE!	0	#VALUE!	#VALUE!
193	features931	2-Acetoxypropionic acid methyl ester	0	9.905	C6 H10 O4			96.8	96.3	99.7	794	847		0		1.27061e+07	10605				4360.43	7.16976e+06			4	#DIV/0!	#DIV/0!	1	0.5	0	0	2	4360.43	0	0	1	1644.28	#VALUE!	#VALUE!	7.17412e+06	0	0	0.0006078	0.999392	#VALUE!	#VALUE!
194	features945	(3-methyl-1-phenyl-but-3-enyl)benzene	0	9.965	C17 H18			97.2	87.8	100	808	861		0		565807	41446.5		75922.9	29063.7		9644	113481		6	1	0.5	0	0.333333	0.25	0	4	9644	7.87255	3.01366	#VALUE!	1	11.767	#VALUE!	228112	0.332832	0.12741	#VALUE!	0.0422775	0.497481	#VALUE!
195	features953	1-Methyl-4-[1-(4-methylphenyl)but-3-enyl]benzene	0	9.993	C18 H20			98.1	99.2	98.8	761	927		0		434994	1185238		605509	7831.71		131712	427097		6	1	0.5	0	0.333333	0.25	0	4	7831.71	77.315	1	#VALUE!	16.8178	54.5342	#VALUE!	1.17215e+06	0.51658	0.0066815	#VALUE!	0.112368	0.36437	#VALUE!
196	features962	Diphenylamine	122-39-4	10.011	C12 H11 N			97.3	95.2	98.6	872	892				3.33347e+06	2289					75757.7	1.25824e+06	8433.14	5	#DIV/0!	#DIV/0!	#DIV/0!	1	0.5	0.333333	3	8433.14	#VALUE!	#VALUE!	0	8.98333	149.201	1	1.34243e+06	#VALUE!	#VALUE!	0	0.0564333	0.937285	0.00628201
197	features967	[1,1'-Bicyclopentyl]-1,1'-diol	5181-75-9	10.07	C10 H18 O2			98.1	100	100	805	906	1786	1384.05		1.5592e+06						346362			2	#DIV/0!	#DIV/0!	#DIV/0!	1	0	0	1	346362	#VALUE!	#VALUE!	#VALUE!	1	#VALUE!	#VALUE!	346362	#VALUE!	#VALUE!	#VALUE!	1	#VALUE!	#VALUE!
198	features968	Cyclopropane, 1,1-diethyl-	1003-19-6	10.107	C7 H14			97.2	100	100	813	857							57665.4			30624.6			2	1	0	0	0.5	0	0	2	30624.6	1.88298	#VALUE!	#VALUE!	1	#VALUE!	#VALUE!	88290	0.653137	#VALUE!	#VALUE!	0.346863	#VALUE!	#VALUE!
199	features970	2-(4-acetoxycyclohex-2-en-1-yl)-2-propargyl-malonic acid diethyl ester	0	10.112	C18 H24 O6			96.9	100	100	816	846		0		882261						274183			2	#DIV/0!	#DIV/0!	#DIV/0!	1	0	0	1	274183	#VALUE!	#VALUE!	#VALUE!	1	#VALUE!	#VALUE!	274183	#VALUE!	#VALUE!	#VALUE!	1	#VALUE!	#VALUE!
200	features973	Tetradecane, 2,5-dimethyl-	56292-69-4	10.136	C16 H34			98.5	100	100	867	925	1798	1514.33		6595.86	4259		123146						3	1	0	0	0	0	0	1	123146	1	#VALUE!	#VALUE!	#VALUE!	#VALUE!	0	123146	1	#VALUE!	#VALUE!	#VALUE!	#VALUE!	0
201	features975	6-Methyl-1-cyclohexenecarboxylic acid	0	10.146	C8 H12 O2			98.9	98.1	100	807	945		0		654966						187281	1104.29		3	#DIV/0!	#DIV/0!	#DIV/0!	1	0.5	0	2	1104.29	#VALUE!	#VALUE!	#VALUE!	169.594	1	#VALUE!	188385	#VALUE!	#VALUE!	#VALUE!	0.994138	0.00586186	#VALUE!
202	features976	Cephapirin	21593-23-7	10.148	C17 H17 N3 O6 S2			98.7	100	100	793	932	1800	3279.67		4.27278e+06	14486			6938.86					3	#DIV/0!	1	0	0	0	0	1	6938.86	#VALUE!	1	#VALUE!	#VALUE!	#VALUE!	#VALUE!	6938.86	#VALUE!	1	#VALUE!	#VALUE!	#VALUE!	#VALUE!
203	features987	3,5-Dimethyl-2-phenyl-1H-pyrrole	0	10.18	C12 H13 N			97.8	82.1	100	815	891		0		950257						15150.6	441913	19896.6	4	#DIV/0!	#DIV/0!	#DIV/0!	1	0.5	0.333333	3	15150.6	#VALUE!	#VALUE!	#VALUE!	1	29.168	1.31326	476960	#VALUE!	#VALUE!	#VALUE!	0.0317649	0.92652	0.0417154
204	features990	[(3S)-5,5-dimethyl-3-oxolanyl]methanol	0	10.222	C7 H14 O2			98.6	100	100	836	929		0		1.63153e+06			19553.7			383827			3	1	0	0	0.5	0	0	2	19553.7	1	#VALUE!	#VALUE!	19.6294	#VALUE!	#VALUE!	403381	0.0484746	#VALUE!	#VALUE!	0.951525	#VALUE!	#VALUE!
205	features993	Benzene, (1-methyldecyl)-	4536-88-3	10.235	C17 H28			97.4	99.7	99.8	875	875							2.3202e+06	319326					2	1	0.5	0	0	0	0	2	319326	7.26592	1	#VALUE!	#VALUE!	0	#VALUE!	2639526	0.879021	0.120979	#VALUE!	#VALUE!	0	#VALUE!
206	features996	2-Butene-1,4-diol, 2,3-dimethyl-, (Z)-	0	10.242	C6 H12 O2			98.2	84.5	96.5	770	982		0			49253.5			3360.86		4.90592e+06	36648.9		4	#DIV/0!	1	0	0.5	0.333333	0	3	3360.86	#VALUE!	1	#VALUE!	1459.72	10.9046	#VALUE!	4.94593e+06	#VALUE!	0.00067952	#VALUE!	0.991911	0.0074099	#VALUE!
207	features1003	2-Keto-2-phenyl-acetic acid tert-butyl ester	0	10.297	C12 H14 O3			98.6	98	98.5	754	958		0		1.26436e+06	5187.5		76690	30732.3	457.714	183168		3731.14	7	1	0.5	0.333333	0.25	0	0.2	5	457.714	167.55	67.1429	1	400.179	#VALUE!	8.15169	294779	0.260161	0.104255	0.00155274	0.621373	#VALUE!	0.0126574
208	features1006	Benzene, (1-pentylheptyl)-	2719-62-2	10.339	C18 H30			96.9	99.6	99.6	853	853				1.88762e+06			1.26837e+06	215494					3	1	0.5	0	0	0	0	2	215494	5.88585	1	#VALUE!	#VALUE!	#VALUE!	#VALUE!	1.48386e+06	0.854775	0.145225	#VALUE!	#VALUE!	#VALUE!	#VALUE!
209	features1015	Benzene, 1,1'-[3-(2-phenylethylidene)-1,5-pentanediyl]bis-	55334-57-1	10.366	C25 H26			97.9	98.8	99.9	802	898	1839	2689.95		5.94484e+08			1.68659e+08	7.09071e+07					3	1	0.5	0	0	0	0	2	7.09071e+07	2.37859	1	#VALUE!	#VALUE!	#VALUE!	#VALUE!	2.39566e+08	0.704019	0.295981	#VALUE!	#VALUE!	#VALUE!	#VALUE!
210	features1043	Benzene, (1-propylnonyl)-	2719-64-4	10.45	C18 H30			96.7	99.7	99.7	839	839				724510			156351	69394.7					3	1	0.5	0	0	0	0	2	69394.7	2.25306	1	#VALUE!	#VALUE!	#VALUE!	#VALUE!	225745	0.692597	0.307403	#VALUE!	#VALUE!	#VALUE!	#VALUE!
211	features1044	1,1-Dimethoxy-3-methyl-2-butanone	0	10.45	C7 H14 O3			99.9	100	100	851	995		0		20003580						5.15009e+06			2	#DIV/0!	#DIV/0!	#DIV/0!	1	0	0	1	5.15009e+06	#VALUE!	#VALUE!	#VALUE!	1	#VALUE!	#VALUE!	5.15009e+06	#VALUE!	#VALUE!	#VALUE!	1	#VALUE!	#VALUE!
212	features1047	2,5,5-trimethyl-6,7-epoxy-hept-3-en-2-yl acetate	0	10.465	C12 H20 O3			99.6	95.5	100	820	977		0					5256.57			118129	1184		3	1	0	0	0.5	0.333333	0	3	1184	4.43967	#VALUE!	#VALUE!	99.771	1	#VALUE!	124569	0.0421979	#VALUE!	#VALUE!	0.948297	0.00950474	#VALUE!
213	features1061	Methyl 2-azido-2-(2-methoxyphenyl)-2-phenyl-acetate	0	10.566	C16 H15 N3 O3			98	95.9	100	803	897		0		281730			12668		334	647772	113335	6346.86	6	1	0	0.5	0.333333	0.25	0.2	5	334	37.9281	#VALUE!	1	1939.44	339.326	19.0026	780455	0.0162315	#VALUE!	0.000427955	0.829992	0.145216	0.00813225
214	features1067	Butanamide, 2-ethyl-N-[(phenylamino)carbonyl]-	0	10.589	C13 H18 N2 O2			96.6	100	100	807	828		0		4.70683e+07			2.43034e+07						2	1	0	0	0	0	0	1	2.43034e+07	1	#VALUE!	#VALUE!	#VALUE!	#VALUE!	#VALUE!	2.43034e+07	1	#VALUE!	#VALUE!	#VALUE!	#VALUE!	#VALUE!
215	features1070	3-Benzyl-5-methylpyridine	74271-42-4	10.604	C13 H13 N			99.2	91.5	100	896	957	1881	1576.38		3.3144e+06				840.571	509.143	51425.4	1.46484e+06		5	#DIV/0!	1	0.5	0.333333	0.25	0	4	509.143	#VALUE!	1.65095	1	101.004	2877.08	#VALUE!	1517618	#VALUE!	0.000553876	0.000335488	0.0338856	0.965225	#VALUE!
216	features1071	Propane, 2-methyl-2-(1-methylethoxy)-	17348-59-3	10.608	C7 H16 O			99.1	97.6	100	920	955				408658						184036			2	#DIV/0!	#DIV/0!	#DIV/0!	1	0	0	1	184036	#VALUE!	#VALUE!	#VALUE!	1	#VALUE!	#VALUE!	184036	#VALUE!	#VALUE!	#VALUE!	1	#VALUE!	#VALUE!
217	features1078	2-Vinyl-1,3-dioxacyclopentanium	0	10.666	C5 H7 O2			98.2	87.7	100	755	911		0		974321	96461			48476	2025.14	120831		7075.14	6	#DIV/0!	1	0.5	0.333333	0	0.25	4	2025.14	#VALUE!	23.9371	1	59.6656	#VALUE!	3.49365	178408	#VALUE!	0.271715	0.0113512	0.677277	#VALUE!	0.0396572
218	features1103	Methylenenaphthocyclobutenone	0	10.799	C13 H8 O			97.8	85.7	100	806	889		0		621551	61074.5			11761.1	10872	21978.3			5	#DIV/0!	1	0.5	0.333333	0	0	3	10872	#VALUE!	1.08178	1	2.02155	#VALUE!	#VALUE!	44611.4	#VALUE!	0.263635	0.243704	0.49266	#VALUE!	#VALUE!
219	features1105	4-Methoxy-1-pentene	98386-09-5	10.806	C6 H12 O			98.3	91	100	784	915	1081	0		652631	2194.5		2449.14	5250.29		108761			5	1	0.5	0	0.333333	0	0	3	2449.14	1	2.14372	#VALUE!	44.4078	#VALUE!	#VALUE!	116461	0.0210298	0.0450821	#VALUE!	0.933888	#VALUE!	#VALUE!
220	features1121	Benzoic acid, 4-methyl-, 3-methyl-2-butyl ester	212261-12-6	10.856	C13 H18 O2			97.3	100	100	778	863				3.08402e+06						859561			2	#DIV/0!	#DIV/0!	#DIV/0!	1	0	0	1	859561	#VALUE!	#VALUE!	#VALUE!	1	#VALUE!	#VALUE!	859561	#VALUE!	#VALUE!	#VALUE!	1	#VALUE!	#VALUE!
221	features1131	1-Benzylimino-6-methyl-1,2,3,4-tetrahydrocarbazole	0	10.894	C20 H22 N2			98.7	91.2	100	826	936		0		164957	16835		2811.71	2499.43		10917.7	1.9248e+06	30294.9	7	1	0.5	0	0.333333	0.25	0.2	5	2499.43	1.12494	1	#VALUE!	4.36808	770.096	12.1207	1.97132e+06	0.00142631	0.00126789	#VALUE!	0.00553827	0.9764	0.0153678
222	features1132	(1Z)-1-(2-oxolanylidene)-2-propanone	0	10.901	C7 H10 O2			99.4	100	100	815	971		0		1.36745e+06						662338			2	#DIV/0!	#DIV/0!	#DIV/0!	1	0	0	1	662338	#VALUE!	#VALUE!	#VALUE!	1	#VALUE!	#VALUE!	662338	#VALUE!	#VALUE!	#VALUE!	1	#VALUE!	#VALUE!
223	features1149	o-(3-Phenylureido)benzoic acid	2164-95-6	10.982	C14 H12 N2 O3			97.6	96.5	100	830	880	1951	2422.57		189280			39391.4			72648.6	10845.4		4	1	0	0	0.5	0.333333	0	3	10845.4	3.63208	#VALUE!	#VALUE!	6.69854	1	#VALUE!	122885	0.320554	#VALUE!	#VALUE!	0.591189	0.0882564	#VALUE!
224	features1166	[(2R,4S,6S)-6-Allyl-4-hydroxytetrahydropyran-2-yl]acetic acid methyl ester	0	11.136	C11 H18 O4			99.5	100	100	855	973		0								513681			1	#DIV/0!	#DIV/0!	#DIV/0!	1	0	0	1	513681	#VALUE!	#VALUE!	#VALUE!	1	#VALUE!	#VALUE!	513681	#VALUE!	#VALUE!	#VALUE!	1	#VALUE!	#VALUE!
225	features1198	1-(4-Methoxyphenyl)-4-phenyl-1H-1,2,3-triazole	0	11.266	C15 H13 N3 O			98.2	92.3	100	818	908		0		3.12963e+06						250327	87913.1		3	#DIV/0!	#DIV/0!	#DIV/0!	1	0.5	0	2	87913.1	#VALUE!	#VALUE!	#VALUE!	2.84744	1	#VALUE!	338240	#VALUE!	#VALUE!	#VALUE!	0.740087	0.259913	#VALUE!
226	features1207	(2E,4Z)-2-Methoxyhexa-2,4-dien-1,6-diol	0	11.3	C7 H12 O3			98.6	92.7	100	848	927		0		757394	6706.5		16575.1	17060.9		125355	4614		6	1	0.5	0	0.333333	0.25	0	4	4614	3.59236	3.69763	#VALUE!	27.1684	1	#VALUE!	163605	0.101312	0.104281	#VALUE!	0.766205	0.0282021	#VALUE!
227	features1209	Diethyl (RS)-nitrosuccinate	0	11.306	C8 H13 N O6			98.9	98	100	777	946		0		3159430					18255.7	165787			3	#DIV/0!	#DIV/0!	1	0.5	0	0	2	18255.7	#VALUE!	#VALUE!	1	9.08135	#VALUE!	#VALUE!	184042	#VALUE!	#VALUE!	0.099193	0.900807	#VALUE!	#VALUE!
228	features1232	Acetaldehyde isobutyl propyl acetal	0	11.424	C9 H20 O2			97.1	92	100	755	854		0					1.94007e+06	10465.1		1918506			3	1	0.5	0	0.333333	0	0	3	10465.1	185.384	1	#VALUE!	183.323	#VALUE!	#VALUE!	3.86904e+06	0.501434	0.00270484	#VALUE!	0.495861	#VALUE!	#VALUE!
229	features1236	4-i-Propyl-6H-dibenzo[b,d]pyran	0	11.429	C16 H16 O			97.4	98.3	100	767	871		0			3.05965e+06		1767.86			106050	88043	1553.57	5	1	0	0	0.5	0.333333	0.25	4	1553.57	1.13793	#VALUE!	#VALUE!	68.2622	56.6714	1	197415	0.00895505	#VALUE!	#VALUE!	0.537195	0.44598	0.00786959
230	features1247	2-[2-(Benzoyloxy)ethoxy]ethyl benzoate	120-55-8	11.467	C18 H18 O5			99.1	98.3	99.1	942	975	2045	2516.02		2.2894e+07				4258		2.23062e+06		3424.57	4	#DIV/0!	1	0	0.5	0	0.333333	3	3424.57	#VALUE!	1.24337	#VALUE!	651.357	#VALUE!	1	2.2383e+06	#VALUE!	0.00190234	#VALUE!	0.996568	#VALUE!	0.00152999
231	features1248	6-(1-Hydroxy-2,2-dimethylpropyl)-1,4-dioxaspiro[4,5]dec-6-ene	0	11.473	C13 H22 O3			98.8	97.7	100	774	938		0		7.74375e+06							16345.6		2	#DIV/0!	#DIV/0!	#DIV/0!	#DIV/0!	1	0	1	16345.6	#VALUE!	#VALUE!	#VALUE!	#VALUE!	1	#VALUE!	16345.6	#VALUE!	#VALUE!	#VALUE!	#VALUE!	1	#VALUE!
232	features1275	1-(2,5-dimethoxy-2H-furan-5-yl)ethanol	0	11.669	C8 H14 O4			99.6	97.3	100	789	979		0		1295370	10621					609345	10274		4	#DIV/0!	#DIV/0!	#DIV/0!	1	0.5	0	2	10274	#VALUE!	#VALUE!	#VALUE!	59.3095	1	#VALUE!	619619	#VALUE!	#VALUE!	#VALUE!	0.983419	0.0165811	#VALUE!
233	features1280	Isophthalic acid, di(cis-hex-3-enyl) ester	0	11.717	C20 H26 O4			97.5	98.1	98	885	913				2.46575e+06						732335			2	#DIV/0!	#DIV/0!	#DIV/0!	1	0	0	1	732335	#VALUE!	#VALUE!	#VALUE!	1	#VALUE!	#VALUE!	732335	#VALUE!	#VALUE!	#VALUE!	1	#VALUE!	#VALUE!
234	features1295	(3-phenyl-1,2-propadienyl)benzene	0	11.829	C15 H12			99.8	100	100	886	989		0			15153		29702.3	3758.29	2658.29	16757.4	79742.9	100120	7	1	0.5	0.333333	0.25	0.2	0.166667	6	2658.29	11.1735	1.4138	1	6.30385	29.9979	37.6635	232739	0.12762	0.016148	0.0114217	0.0720008	0.342627	0.430182
235	features1312	1-Tridecen-4-ol, 3-methylene-	0	11.881	C14 H26 O			98.7	88.5	100	836	935		0		87111.4	6206.5					15506.9	3328.57		4	#DIV/0!	#DIV/0!	#DIV/0!	1	0.5	0	2	3328.57	#VALUE!	#VALUE!	#VALUE!	4.65871	1	#VALUE!	18835.4	#VALUE!	#VALUE!	#VALUE!	0.823281	0.176719	#VALUE!
236	features1317	Diethyl(9H-fluoren-9-yl)amine	0	11.937	C17 H19 N			93.2	92.5	92.1	819	819		0		135463						73214.3	80471.4		3	#DIV/0!	#DIV/0!	#DIV/0!	1	0.5	0	2	73214.3	#VALUE!	#VALUE!	#VALUE!	1	1.09912	#VALUE!	153686	#VALUE!	#VALUE!	#VALUE!	0.47639	0.52361	#VALUE!
237	features1320	2,6-Diisopropylphenyl 2',4',6'-trimethylbiphenyl-2-carboxylate	0	11.949	C28 H32 O2			98.2	94.9	100	910	910		0		105039	326146					185539	67544.6		4	#DIV/0!	#DIV/0!	#DIV/0!	1	0.5	0	2	67544.6	#VALUE!	#VALUE!	#VALUE!	2.74691	1	#VALUE!	253083	#VALUE!	#VALUE!	#VALUE!	0.733113	0.266887	#VALUE!
238	features1332	2,6-Dimethyl-5-oxoheptanoic acid	0	12.034	C9 H16 O3			99.2	94.3	100	872	957		0		3.65758e+06				439919		958743			3	#DIV/0!	1	0	0.5	0	0	2	439919	#VALUE!	1	#VALUE!	2.17936	#VALUE!	#VALUE!	1.39866e+06	#VALUE!	0.314528	#VALUE!	0.685472	#VALUE!	#VALUE!
239	features1333	2H-Pyran-2-carboxylic acid, 6-ethoxy-3,6-dihydro-, ethyl ester	13687-98-4	12.046	C10 H16 O4			98.1	96.7	100	870	902	2160	1330.67		1.96392e+06	3151					828983			3	#DIV/0!	#DIV/0!	#DIV/0!	1	0	0	1	828983	#VALUE!	#VALUE!	#VALUE!	1	#VALUE!	#VALUE!	828983	#VALUE!	#VALUE!	#VALUE!	1	#VALUE!	#VALUE!
240	features1337	exo-1,2,3,4-tetrahydro-9-isopropyl-N-methyl-1,4-iminonaphthalene-2,3-dicarboximide	0	12.073	C16 H18 N2 O2			96.2	100	100	751	811		0		4.0768e+06							144382		2	#DIV/0!	#DIV/0!	#DIV/0!	#DIV/0!	1	0	1	144382	#VALUE!	#VALUE!	#VALUE!	#VALUE!	1	#VALUE!	144382	#VALUE!	#VALUE!	#VALUE!	#VALUE!	1	#VALUE!
241	features1350	[1-(4-nitrobenzoyl)-2-piperidyl]methyl 4-nitrobenzoate	0	12.113	C20 H19 N3 O7			98.3	100	100	814	914		0		17245.7	861448		15103.7				4749.43		4	1	0	0	0	0.5	0	2	4749.43	3.18011	#VALUE!	#VALUE!	#VALUE!	1	#VALUE!	19853.1	0.760772	#VALUE!	#VALUE!	#VALUE!	0.239228	#VALUE!
242	features1354	6,6-Diethyl-2,4-dimethyl-6H-dibenzo[b,d]pyran	0	12.174	C19 H22 O			97.8	98	100	816	891		0		40325.7	68411.5			1468.29	722.857			2073.71	5	#DIV/0!	1	0.5	0	0	0.333333	3	722.857	#VALUE!	2.03123	1	#VALUE!	#VALUE!	2.86877	4264.86	#VALUE!	0.344275	0.169492	#VALUE!	#VALUE!	0.486233
243	features1358	Ethanol, 2,2'-[1,2-ethanediylbis(oxy)]bis-, diacetate	111-21-7	12.247	C10 H18 O6			99.8	92.4	100	878	990	2201	1575		69994.3				3840.86			3448.86		3	#DIV/0!	1	0	0	0.5	0	2	3448.86	#VALUE!	1.11366	#VALUE!	#VALUE!	1	#VALUE!	7289.71	#VALUE!	0.526887	#VALUE!	#VALUE!	0.473113	#VALUE!
244	features1363	Ethyl 2-oxohexadecanoate	0	12.307	C18 H34 O3			98.5	85.3	100	753	925		0		798603	3916.5		18967.4	1214.57	588	274489	2513.43		7	1	0.5	0.333333	0.25	0.2	0	5	588	32.2575	2.0656	1	466.817	4.27454	#VALUE!	297772	0.0636978	0.00407886	0.00197467	0.921808	0.00844078	#VALUE!
245	features1381	1,2-bis[p-(Methoxycarbonyl)phenyl]-ethane-1,2-dione	0	12.463	C18 H14 O6			97.2	91.7	100	753	857		0			3279.5					3.006e+06	8036.07		3	#DIV/0!	#DIV/0!	#DIV/0!	1	0.5	0	2	8036.07	#VALUE!	#VALUE!	#VALUE!	374.063	1	0	3.01404e+06	#VALUE!	#VALUE!	#VALUE!	0.997334	0.00266622	0
246	features1402	Phthalic acid, 3,5-dimethylphenyl 4-formylphenyl ester	0	12.517	C23 H18 O5			98.9	100	100	852	946		0		1.02713e+08					1.38648e+07	1.22745e+07			3	#DIV/0!	#DIV/0!	1	0.5	0	0	2	1.22745e+07	#VALUE!	#VALUE!	1.12956	1	#VALUE!	#VALUE!	26139255	#VALUE!	#VALUE!	0.530419	0.469581	#VALUE!	#VALUE!
247	features1441	2-O-Benzoyl-3,5-di-O-methyl-D-glucofuranose	0	12.738	C15 H20 O7			98.6	98.3	98.7	877	954		0		412656									1	#DIV/0!	#DIV/0!	#DIV/0!	#DIV/0!	#DIV/0!	#DIV/0!	0	0	#DIV/0!	#VALUE!	#DIV/0!	#VALUE!	#VALUE!	#DIV/0!	0	#DIV/0!	#VALUE!	#DIV/0!	#VALUE!	#VALUE!	#DIV/0!
248	features1451	(Z)-4-Allyl-3-butyldec-3-en-2-ol	0	12.782	C17 H32 O			99.4	97.5	100	823	967		0		169051	1.88966e+06					515221			3	#DIV/0!	#DIV/0!	#DIV/0!	1	0	0	1	515221	#VALUE!	#VALUE!	#VALUE!	1	#VALUE!	#VALUE!	515221	#VALUE!	#VALUE!	#VALUE!	1	#VALUE!	#VALUE!
249	features1462	2-Methylhept-6-ene-1,2-diol	0	12.813	C8 H16 O2			99.9	83.1	100	785	996		0		7.54731e+06						2.27752e+06			2	#DIV/0!	#DIV/0!	#DIV/0!	1	0	0	1	2.27752e+06	#VALUE!	#VALUE!	#VALUE!	1	#VALUE!	#VALUE!	2.27752e+06	#VALUE!	#VALUE!	#VALUE!	1	#VALUE!	#VALUE!
250	features1469	7-Methoxy-2,8-dioxabicyclo[5.3.0]decan-9-one	0	12.883	C9 H14 O4			98.6	93.1	100	849	931		0		1.86134e+06						689050			2	#DIV/0!	#DIV/0!	#DIV/0!	1	0	0	1	689050	#VALUE!	#VALUE!	#VALUE!	1	#VALUE!	#VALUE!	689050	#VALUE!	#VALUE!	#VALUE!	1	#VALUE!	#VALUE!
251	features1473	5-Tert-Butyl-2-p-tolylbenzofuran	0	12.924	C19 H20 O			97.3	91	100	777	866		0		576796	3208.5					202795	45241.1		4	#DIV/0!	#DIV/0!	#DIV/0!	1	0.5	0	2	45241.1	#VALUE!	#VALUE!	#VALUE!	4.48253	1	#VALUE!	248036	#VALUE!	#VALUE!	#VALUE!	0.817603	0.182397	#VALUE!
252	features1475	1-(4-(4-(tert-butyl)phenoxy)phenyl)ethanone	0	12.946	C18 H20 O2			98.1	97.3	100	776	905		0		234169	2.46801e+06					684474			3	#DIV/0!	#DIV/0!	#DIV/0!	1	0	0	1	684474	#VALUE!	#VALUE!	#VALUE!	1	#VALUE!	#VALUE!	684474	#VALUE!	#VALUE!	#VALUE!	1	#VALUE!	#VALUE!
253	features1481	3-(4-Isopropylphenyl)quinazolin-4(3H)-one	0	12.995	C17 H16 N2 O			98.3	90.7	100	788	914		0		687024	11026		7535.14		1385.14	162439	4053.14	3794	7	1	0	0.5	0.333333	0.25	0.2	5	1385.14	5.43998	#VALUE!	1	117.272	2.92616	2.73907	179206	0.0420474	#VALUE!	0.00772933	0.906435	0.0226172	0.0211712
254	features1489	(E)-2-Propyl-2-vinyl-1,3-dioxolane	0	13.014	C8 H14 O2			96.3	96	100	773	814		0		284190	2476.5					135187			3	#DIV/0!	#DIV/0!	#DIV/0!	1	0	0	1	135187	#VALUE!	#VALUE!	#VALUE!	1	#VALUE!	#VALUE!	135187	#VALUE!	#VALUE!	#VALUE!	1	#VALUE!	#VALUE!
255	features1512	Glutaric acid, 3-methylbut-2-yl 2-heptyl ester	0	13.088	C17 H32 O4			95.8	99.5	99.5	777	796				2.65965e+06	4574.5					872220			3	#DIV/0!	#DIV/0!	#DIV/0!	1	0	0	1	872220	#VALUE!	#VALUE!	0	1	0	0	872220	#VALUE!	#VALUE!	0	1	0	0
256	features1517	1-(2,5-dimethoxy-2H-furan-5-yl)ethanol	0	13.099	C8 H14 O4			99.6	100	100	801	978		0		1.88967e+07						7.49701e+06			2	#DIV/0!	#DIV/0!	#DIV/0!	1	0	0	1	7.49701e+06	#VALUE!	#VALUE!	#VALUE!	1	#VALUE!	#VALUE!	7.49701e+06	#VALUE!	#VALUE!	#VALUE!	1	#VALUE!	#VALUE!
257	features1520	(S)-4-methyl-N1,N1-dioctylpentane-1,2-diamine	0	13.11	C22 H48 N2			98.7	100	100	756	936		0		242262	288496				386490	2281.71	2860.57		5	#DIV/0!	#DIV/0!	1	0.5	0.333333	0	3	2281.71	#VALUE!	#VALUE!	169.386	1	1.25369	#VALUE!	391632	#VALUE!	#VALUE!	0.98687	0.00582616	0.00730423	#VALUE!
258	features1532	2-(4-Methoxyphenyl)-3,5-dimethylbenzofuran	0	13.207	C17 H16 O2			98.3	93.9	100	781	912		0		1.0072e+07	6.80365e+06					3.92389e+07	5.75352e+06		4	#DIV/0!	#DIV/0!	#DIV/0!	1	0.5	0	2	5.75352e+06	#VALUE!	#VALUE!	#VALUE!	6.81999	1	#VALUE!	4.49924e+07	#VALUE!	#VALUE!	#VALUE!	0.872123	0.127877	#VALUE!
259	features1550	9,10-Anthracenediol, 9,10-dihydro-9,10-dipropyl-, trans-	0	13.272	C20 H24 O2			99	92.2	100	869	950		0		1.48697e+06	27280					729438	104296		4	#DIV/0!	#DIV/0!	#DIV/0!	1	0.5	0	2	104296	#VALUE!	0	0	6.99389	1	#VALUE!	833735	#VALUE!	0	0	0.874905	0.125095	#VALUE!
260	features1557	4,5-Dioxoundecanal	0	13.3	C11 H18 O3			99.8	83.5	100	805	991		0		109686			7198			43579.4			3	1	0	0	0.5	0	0	2	7198	1	#VALUE!	#VALUE!	6.05438	#VALUE!	#VALUE!	50777.4	0.141756	#VALUE!	#VALUE!	0.858244	#VALUE!	#VALUE!
261	features1574	Methyl (3S,6S,9S)-3-[9-(Fluorenyl)methoxycarbonylamino]-2-oxo-7,1-oxazabicyclo[4.3.0]nonane-9-carboxylate	0	13.391	C24 H24 N2 O6			93.4	100	100	751	918		0			5571923				5.9595e+06				2	#DIV/0!	#DIV/0!	1	0	0	0	1	5.9595e+06	#VALUE!	#VALUE!	1	#VALUE!	#VALUE!	#VALUE!	5.9595e+06	#VALUE!	#VALUE!	1	#VALUE!	#VALUE!	#VALUE!
262	features1586	Phthalic acid, 3,5-dimethylphenyl 4-formylphenyl ester	0	13.508	C23 H18 O5			98.1	100	100	768	903		0			192725					1.26805e+06	145381		3	#DIV/0!	#DIV/0!	#DIV/0!	1	0.5	0	2	145381	#VALUE!	#VALUE!	#VALUE!	8.72223	1	#VALUE!	1.41343e+06	#VALUE!	#VALUE!	#VALUE!	0.897143	0.102857	#VALUE!
263	features1593	1-Cyanocyclopentyl benzoate	0	13.533	C13 H13 N O2			99.1	98.5	98.5	928	984		0		2.11141e+07				21867.4	39666		1290898		4	#DIV/0!	1	0.5	0	0.333333	0	3	21867.4	#VALUE!	1	1.81393	#VALUE!	59.0329	#VALUE!	1.35243e+06	#VALUE!	0.016169	0.0293294	#VALUE!	0.954502	#VALUE!
264	features1596	1,3-Diphenyl-2-phthalidyl-propane-1,3-dione	0	13.546	C23 H16 O4			100	80.8	100	787	999		0		571000	1914215					2.42365e+06			3	#DIV/0!	#DIV/0!	#DIV/0!	1	0	0	1	2.42365e+06	#VALUE!	#VALUE!	#VALUE!	1	#VALUE!	#VALUE!	2.42365e+06	#VALUE!	#VALUE!	#VALUE!	1	#VALUE!	#VALUE!
265	features1597	3-[5'-Hydroxy-3'-methyll-1',2'-dioxopent-3'-enyl]-2,2,4-trimethylcyclohex-3-enone	0	13.562	C15 H20 O4			95.2	87.1	91.6	772	925		0		210900	14507		17695.4		7117.14	42552.9			5	1	0	0.5	0.333333	0	0	3	7117.14	2.48631	#VALUE!	1	5.97892	#VALUE!	#VALUE!	67365.4	0.262678	#VALUE!	0.10565	0.631672	#VALUE!	#VALUE!
266	features1630	1,1,1-tris(Ethoxycarbonyl)-2,2-diphenylethane	0	13.648	C23 H26 O6			95.1	100	100	756	756		0		8.45358e+06	59205.5				19640.6	2.85455e+06			4	#DIV/0!	#DIV/0!	1	0.5	0	0	2	19640.6	#VALUE!	#VALUE!	1	145.339	#VALUE!	#VALUE!	2.87419e+06	#VALUE!	#VALUE!	0.00683343	0.993167	#VALUE!	#VALUE!
267	features1631	rel-(4S,5S,9R)-4-Hydroxy-4,9-dimethyl-1,6-dioxaspiro[4,5]decane	0	13.649	C10 H18 O3			98.1	91.9	100	828	905		0		2.53665e+06						1.29561e+06	12567.1		3	#DIV/0!	#DIV/0!	#DIV/0!	1	0.5	0	2	12567.1	#VALUE!	#VALUE!	#VALUE!	103.095	1	#VALUE!	1.30818e+06	#VALUE!	#VALUE!	#VALUE!	0.990393	0.00960657	#VALUE!
268	features1675	5,9-Methanobenzocycloocten-11-one, dodecahydro-4a-hydroxy-10-methyl-, (4aα,5α,9α,10β,10aβ)-	0	14.02	C14 H22 O2			98.4	95	100	815	921		0		2.35145e+06						845717			2	#DIV/0!	#DIV/0!	#DIV/0!	1	0	0	1	845717	#VALUE!	#VALUE!	#VALUE!	1	#VALUE!	#VALUE!	845717	#VALUE!	#VALUE!	#VALUE!	1	#VALUE!	#VALUE!
269	features1724	2,6,8,9,10,11,12-Heptamethyl-7-oxotricyclo[8.3.0(8,12).0(5,13)]trideca-2,4,10,13-tetraene	0	14.254	C20 H26 O			98.7	100	100	752	933		0		122929			142526			152009			3	1	0	0	0.5	0	0	2	142526	1	0	#VALUE!	1.06653	0	0	294535	0.483903	0	#VALUE!	0.516097	0	0
270	features1730	(S)-2-[(2R,5S,6R)-6-[(S)-1-(4-Methoxybenzyloxymethyl)ethyl]-5-methyltetrahydropyran-2-yl]butan-1-ol	0	14.272	C21 H34 O4			91.6	98.6	100	846	918		0					43922.4			8175.29			2	1	0	0	0.5	0	0	2	8175.29	5.37259	0	0	1	0	#VALUE!	52097.7	0.843078	0	0	0.156922	0	#VALUE!
271	features1753	9(10H)-Anthracenone, 10-[(4-hydroxypentyl)oxy]-10-phenyl-	0	14.497	C25 H24 O3			97.2	96.7	97.4	912	912		0		123377	340578		21096			35158.6			4	1	0	0	0.5	0	0	2	21096	1	0	0	1.6666	0	0	56254.6	0.37501	0	0	0.62499	0	0
272	features1788	(+)-Syributin 2	0	14.706	C15 H24 O6			97.9	100	100	752	896		0		319154					78699.4		13408.3	26484.3	4	#DIV/0!	#DIV/0!	1	0	0.5	0.333333	3	13408.3	#VALUE!	#VALUE!	5.86946	#VALUE!	1	1.97522	118592	#VALUE!	#VALUE!	0.663615	#VALUE!	0.113062	0.223323
273	features1804	3-Ethoxy-5-methyl-5-(ethoxycarbonyl)-2(5H)-furanone	0	14.855	C10 H14 O5			96.1	90.5	95	799	902		0		464556			12438.6			139108			3	1	0	0	0.5	0	0	2	12438.6	1	#VALUE!	#VALUE!	11.1836	#VALUE!	#VALUE!	151547	0.0820776	#VALUE!	#VALUE!	0.917922	#VALUE!	#VALUE!
274	features1808	2-[(2S)-tetrahydropyran-2-yl]oxypropionic acid ethyl ester	0	14.873	C10 H18 O4			100	85.8	100	812	999		0		365462						92748.4			2	#DIV/0!	#DIV/0!	#DIV/0!	1	0	0	1	92748.4	0	0	#VALUE!	1	#VALUE!	0	92748.4	0	0	#VALUE!	1	#VALUE!	0
275	features1812	(E)-4-(3-Butenone-1-yl)-5-hydroxy-2-methyl-1,3-dioxane	0	14.947	C9 H14 O4			97.1	84	97.4	812	904		0		910247					12436.9	423877			3	#DIV/0!	#DIV/0!	1	0.5	0	0	2	12436.9	#VALUE!	#VALUE!	1	34.0823	#VALUE!	#VALUE!	436314	#VALUE!	#VALUE!	0.0285044	0.971496	#VALUE!	#VALUE!
276	features1833	2,2',3,3'-Tetrahydroxy-5,5'-dimethyl-6,6'-dinitrobiphenyl tetraacetyl dev.	0	15.767	C22 H20 N2 O12			95.8	86.6	100	787	787		0		24099.6			284033			228979	72251.4		4	1	0	0	0.5	0.333333	0	3	72251.4	3.93118	0	#VALUE!	3.1692	1	#VALUE!	585264	0.485308	0	#VALUE!	0.391241	0.123451	#VALUE!
277	features1864	cis-Sesquilavandulol	0	16.927	C15 H26 O			98.6	100	100	794	929		0		70365.7	32313						18399.4		3	#DIV/0!	#DIV/0!	#DIV/0!	#DIV/0!	1	0	1	18399.4	#VALUE!	#VALUE!	#VALUE!	#VALUE!	1	#VALUE!	18399.4	#VALUE!	#VALUE!	#VALUE!	#VALUE!	1	#VALUE!
278	features1866	Monoallyl phthalate	0	17.146	C11 H10 O4			98.6	100	100	802	931		0		2.17111e+06						421708			2	#DIV/0!	#DIV/0!	#DIV/0!	1	0	0	1	421708	#VALUE!	#VALUE!	#VALUE!	1	#VALUE!	0	421708	#VALUE!	#VALUE!	#VALUE!	1	#VALUE!	0
279	features1882	3-Cyano-5,5-dimethoxycarbonyl-N-methylisoxazolidine	71167-53-8	17.778	C9 H12 N2 O5			98.2	98.9	100	772	908	3300	0			24081.5		71317.4	30364.3		57674.3			4	1	0.5	0	0.333333	0	0	3	30364.3	2.34873	1	#VALUE!	1.89941	#VALUE!	#VALUE!	159356	0.447535	0.190544	#VALUE!	0.361921	#VALUE!	#VALUE!
280	features1888	(4R,6R)-4-hydroxy-6-pentyl-2-oxanone	0	20.877	C10 H18 O3			98.5	99.6	100	793	924		0		6.11733e+06						2.30669e+06			2	#DIV/0!	#DIV/0!	#DIV/0!	1	0	0	1	2.30669e+06	#VALUE!	#VALUE!	#VALUE!	1	0	0	2.30669e+06	#VALUE!	#VALUE!	#VALUE!	1	0	0
281	features1889	3-Hexyn-2-ol, 5-methyl-	23293-50-7	20.915	C7 H12 O			98.8	95.4	100	898	939	3579	0		3.18851e+07						9.23494e+06	88786	57223.1	4	#DIV/0!	#DIV/0!	#DIV/0!	1	0.5	0.333333	3	57223.1	#VALUE!	#VALUE!	#VALUE!	161.385	1.55158	1	9.38095e+06	#VALUE!	#VALUE!	#VALUE!	0.984436	0.0094645	0.00609993
CL4																																0	0	#DIV/0!	#DIV/0!	#DIV/0!	#DIV/0!	#DIV/0!	#DIV/0!	0	#DIV/0!	#DIV/0!	#DIV/0!	#DIV/0!	#DIV/0!	#DIV/0!
1	features1			0.022												58488.4									1	#DIV/0!	#DIV/0!	#DIV/0!	#DIV/0!	#DIV/0!	#DIV/0!	0	0	#DIV/0!	#VALUE!	#VALUE!	#DIV/0!	#VALUE!	#VALUE!	0	#DIV/0!	#VALUE!	#VALUE!	#DIV/0!	#VALUE!	#VALUE!
2	features2			0.022												75175.5						17498.6			2	#DIV/0!	#DIV/0!	#DIV/0!	1	0	0	1	17498.6	#VALUE!	#VALUE!	#VALUE!	1	#VALUE!	#VALUE!	17498.6	#VALUE!	#VALUE!	#VALUE!	1	#VALUE!	#VALUE!
3	features3			0.024												92618.6						30322.9			2	#DIV/0!	#DIV/0!	#DIV/0!	1	0	0	1	30322.9	0	#VALUE!	#VALUE!	1	#VALUE!	#VALUE!	30322.9	0	#VALUE!	#VALUE!	1	#VALUE!	#VALUE!
4	features4			0.029												247087									1	#DIV/0!	#DIV/0!	#DIV/0!	#DIV/0!	#DIV/0!	#DIV/0!	0	0	#DIV/0!	#VALUE!	#VALUE!	#DIV/0!	#VALUE!	#VALUE!	0	#DIV/0!	#VALUE!	#VALUE!	#DIV/0!	#VALUE!	#VALUE!
5	features5			0.033												22824.4									1	#DIV/0!	#DIV/0!	#DIV/0!	#DIV/0!	#DIV/0!	#DIV/0!	0	0	#DIV/0!	#DIV/0!	#VALUE!	#DIV/0!	#VALUE!	#VALUE!	0	#DIV/0!	#DIV/0!	#VALUE!	#DIV/0!	#VALUE!	#VALUE!
6	features6			0.037												60617.8	10069								2	#DIV/0!	#DIV/0!	#DIV/0!	#DIV/0!	#DIV/0!	#DIV/0!	0	0	#DIV/0!	#DIV/0!	#VALUE!	#DIV/0!	#VALUE!	#VALUE!	0	#DIV/0!	#DIV/0!	#VALUE!	#DIV/0!	#VALUE!	#VALUE!
7	features7			0.041																		11436.4			1	#DIV/0!	#DIV/0!	#DIV/0!	1	0	0	1	11436.4	0	#VALUE!	#VALUE!	1	#VALUE!	0	11436.4	0	#VALUE!	#VALUE!	1	#VALUE!	0
8	features8			0.056												247087									1	#DIV/0!	#DIV/0!	#DIV/0!	#DIV/0!	#DIV/0!	#DIV/0!	0	0	#DIV/0!	#DIV/0!	#VALUE!	#DIV/0!	#DIV/0!	#VALUE!	0	#DIV/0!	#DIV/0!	#VALUE!	#DIV/0!	#DIV/0!	#VALUE!
9	features9			0.167												54127.1			24709.1	308290		1948			4	1	0.5	0	0.333333	0	0	3	1948	12.6844	158.26	#VALUE!	1	#VALUE!	#VALUE!	334947	0.0737703	0.920414	#VALUE!	0.00581585	#VALUE!	#VALUE!
10	features10			0.169												24681.4			197111						2	1	0	0	0	0	0	1	197111	1	#VALUE!	#VALUE!	#VALUE!	#VALUE!	#VALUE!	197111	1	#VALUE!	#VALUE!	#VALUE!	#VALUE!	#VALUE!
11	features11			0.171															480535						1	1	0	0	0	0	0	1	480535	1	#VALUE!	#VALUE!	#VALUE!	#VALUE!	#VALUE!	480535	1	#VALUE!	#VALUE!	#VALUE!	#VALUE!	#VALUE!
12	features12			0.216															1.41726e+06			90496.6			2	1	0	0	0.5	0	0	2	90496.6	15.6609	#VALUE!	#VALUE!	1	0	0	1.50775e+06	0.939979	#VALUE!	#VALUE!	0.0600209	0	0
13	features13			0.262															5212	3539.43	3711.71				3	1	0.5	0.333333	0	0	0	3	3539.43	1.47255	1	1.04868	#VALUE!	#VALUE!	#VALUE!	12463.1	0.418193	0.283992	0.297815	#VALUE!	#VALUE!	#VALUE!
14	features14			0.287															564623						1	1	0	0	0	0	0	1	564623	1	#VALUE!	#VALUE!	#VALUE!	#VALUE!	#VALUE!	564623	1	#VALUE!	#VALUE!	#VALUE!	#VALUE!	#VALUE!
15	features15			0.478													3195.5		234439				3310.86		3	1	0	0	0	0.5	0	2	3310.86	70.8093	#VALUE!	#VALUE!	#VALUE!	1	#VALUE!	237750	0.986074	#VALUE!	#VALUE!	#VALUE!	0.0139258	#VALUE!
16	features17			0.729												9.68263e+06	2773.5			1572.29				1320	4	#DIV/0!	1	0	0	0	0.5	2	1320	#VALUE!	1.19113	#VALUE!	#VALUE!	#VALUE!	1	2892.29	#VALUE!	0.543614	#VALUE!	#VALUE!	#VALUE!	0.456386
17	features18			0.754															2696.57				2551.43		2	1	0	0	0	0.5	0	2	2551.43	1.05689	#VALUE!	0	0	1	0	5248	0.513828	#VALUE!	0	0	0.486172	0
18	features22			1.109												25902.9					7393.43		3363.43		3	#DIV/0!	#DIV/0!	1	0	0.5	0	2	3363.43	#VALUE!	#VALUE!	2.19818	#VALUE!	1	#VALUE!	10756.9	#VALUE!	#VALUE!	0.687322	#VALUE!	0.312678	#VALUE!
19	features23			1.226												1.35257e+06	1638.5						1926.86		3	#DIV/0!	#DIV/0!	#DIV/0!	#DIV/0!	1	0	1	1926.86	#VALUE!	#VALUE!	#VALUE!	#VALUE!	1	#VALUE!	1926.86	#VALUE!	#VALUE!	#VALUE!	#VALUE!	1	#VALUE!
20	features24			1.238												15242.7									1	#DIV/0!	#DIV/0!	#DIV/0!	#DIV/0!	#DIV/0!	#DIV/0!	0	0	#VALUE!	#VALUE!	#VALUE!	#DIV/0!	#DIV/0!	#DIV/0!	0	#VALUE!	#VALUE!	#VALUE!	#DIV/0!	#DIV/0!	#DIV/0!
21	features25			1.312																			3384.57	6025.71	2	#DIV/0!	#DIV/0!	#DIV/0!	#DIV/0!	1	0.5	2	3384.57	#VALUE!	#VALUE!	#VALUE!	#VALUE!	1	1.78035	9410.29	#VALUE!	#VALUE!	#VALUE!	#VALUE!	0.359667	0.640333
22	features28			1.386												5.26387e+06									1	#DIV/0!	#DIV/0!	#DIV/0!	#DIV/0!	#DIV/0!	#DIV/0!	0	0	#VALUE!	#VALUE!	#VALUE!	#VALUE!	#VALUE!	#VALUE!	0	#VALUE!	#VALUE!	#VALUE!	#VALUE!	#VALUE!	#VALUE!
23	features29			1.619												25805.7	8744					2418.57			3	#DIV/0!	#DIV/0!	#DIV/0!	1	0	0	1	2418.57	#VALUE!	#VALUE!	#VALUE!	1	#VALUE!	#VALUE!	2418.57	#VALUE!	#VALUE!	#VALUE!	1	#VALUE!	#VALUE!
24	features36			2.019												51462.9								5367.14	2	#DIV/0!	#DIV/0!	#DIV/0!	#DIV/0!	#DIV/0!	1	1	5367.14	#VALUE!	#VALUE!	#VALUE!	#VALUE!	#VALUE!	1	5367.14	#VALUE!	#VALUE!	#VALUE!	#VALUE!	#VALUE!	1
25	features39			2.032												6.78587e+06	183392					161909			3	#DIV/0!	#DIV/0!	#DIV/0!	1	0	0	1	161909	#VALUE!	#VALUE!	#VALUE!	1	#VALUE!	#VALUE!	161909	#VALUE!	#VALUE!	#VALUE!	1	#VALUE!	#VALUE!
26	features40			2.05													703066					10699.4			2	#DIV/0!	#DIV/0!	#DIV/0!	1	0	0	1	10699.4	#VALUE!	#VALUE!	#VALUE!	1	#VALUE!	#VALUE!	10699.4	#VALUE!	#VALUE!	#VALUE!	1	#VALUE!	#VALUE!
27	features41			2.065												5914.29						384527	1671.43		3	#DIV/0!	#DIV/0!	#DIV/0!	1	0.5	0	2	1671.43	#VALUE!	#VALUE!	#VALUE!	230.059	1	#VALUE!	386199	#VALUE!	#VALUE!	#VALUE!	0.995672	0.0043279	#VALUE!
28	features46			2.197												2.4599e+06									1	#DIV/0!	#DIV/0!	#DIV/0!	#DIV/0!	#DIV/0!	#DIV/0!	0	0	#VALUE!	#VALUE!	#VALUE!	#VALUE!	#VALUE!	#VALUE!	0	#VALUE!	#VALUE!	#VALUE!	#VALUE!	#VALUE!	#VALUE!
29	features47			2.299												3653033									1	#DIV/0!	#DIV/0!	#DIV/0!	#DIV/0!	#DIV/0!	#DIV/0!	0	0	#VALUE!	#VALUE!	#VALUE!	#VALUE!	#VALUE!	#DIV/0!	0	#VALUE!	#VALUE!	#VALUE!	#VALUE!	#VALUE!	#DIV/0!
30	features50			2.457												1.26036e+06	2133.5					1039.29		2923	4	#DIV/0!	#DIV/0!	#DIV/0!	1	0	0.5	2	1039.29	#VALUE!	0	0	1	#VALUE!	2.81251	3962.29	#VALUE!	0	0	0.262294	#VALUE!	0.737706
31	features51			2.534												962824									1	#DIV/0!	#DIV/0!	#DIV/0!	#DIV/0!	#DIV/0!	#DIV/0!	0	0	#VALUE!	#VALUE!	#VALUE!	#VALUE!	#VALUE!	#DIV/0!	0	#VALUE!	#VALUE!	#VALUE!	#VALUE!	#VALUE!	#DIV/0!
32	features53			2.596													28941.5					5875900			2	#DIV/0!	#DIV/0!	#DIV/0!	1	0	0	1	5875900	#VALUE!	#VALUE!	#VALUE!	1	#VALUE!	#VALUE!	5875900	#VALUE!	#VALUE!	#VALUE!	1	#VALUE!	#VALUE!
33	features57			2.72												1868.29	1178.5					204045	11594		4	#DIV/0!	#DIV/0!	#DIV/0!	1	0.5	0	2	11594	#VALUE!	#VALUE!	#VALUE!	17.5992	1	#VALUE!	215639	#VALUE!	#VALUE!	#VALUE!	0.946234	0.0537657	#VALUE!
34	features59			2.755												340144						508666			2	#DIV/0!	#DIV/0!	#DIV/0!	1	0	0	1	508666	#VALUE!	#VALUE!	#VALUE!	1	#VALUE!	#VALUE!	508666	#VALUE!	#VALUE!	#VALUE!	1	#VALUE!	#VALUE!
35	features61			2.831												8325.71						26628.3			2	#DIV/0!	#DIV/0!	#DIV/0!	1	0	0	1	26628.3	#VALUE!	#VALUE!	#VALUE!	1	#VALUE!	#VALUE!	26628.3	#VALUE!	#VALUE!	#VALUE!	1	#VALUE!	#VALUE!
36	features62			2.851													987					22483.1			2	#DIV/0!	#DIV/0!	#DIV/0!	1	0	0	1	22483.1	#VALUE!	#VALUE!	#VALUE!	1	#VALUE!	#VALUE!	22483.1	#VALUE!	#VALUE!	#VALUE!	1	#VALUE!	#VALUE!
37	features63			2.974												9958.57	115164			2121.14	427.143	371462	364710	18105.1	7	#DIV/0!	1	0.5	0.333333	0.25	0.2	5	427.143	#VALUE!	4.96589	1	869.643	853.835	42.3866	756825	#VALUE!	0.00280269	0.000564388	0.490816	0.481894	0.0239225
38	features64			3.009												112684	1.0354e+06			8786.29	10574.9	1.39529e+06	3.33124e+06	264604	7	#DIV/0!	1	0.5	0.333333	0.25	0.2	5	8786.29	#VALUE!	1	1.20356	158.803	379.14	30.1155	5.01049e+06	#VALUE!	0.00175358	0.00211054	0.278473	0.664852	0.05281
39	features66			3.047												26054.3	526789			3773.14	21552.9	1516438	1.5189e+06	102535	7	#DIV/0!	1	0.5	0.333333	0.25	0.2	5	3773.14	#VALUE!	1	5.71218	401.903	402.556	27.1748	3.1632e+06	#VALUE!	0.00119282	0.00681362	0.4794	0.480179	0.0324148
40	features67			3.151												51094.3					11067.1	164607			3	#DIV/0!	#DIV/0!	1	0.5	0	0	2	11067.1	#VALUE!	#VALUE!	1	14.8735	#VALUE!	#VALUE!	175675	#VALUE!	#VALUE!	0.062998	0.937002	#VALUE!	#VALUE!
41	features68			3.198												75409.3					4710.71				2	#DIV/0!	#DIV/0!	1	0	0	0	1	4710.71	#VALUE!	#VALUE!	1	#VALUE!	#VALUE!	#VALUE!	4710.71	#VALUE!	#VALUE!	1	#VALUE!	#VALUE!	#VALUE!
42	features72			3.39												883272									1	#DIV/0!	#DIV/0!	#DIV/0!	#DIV/0!	#DIV/0!	#DIV/0!	0	0	#VALUE!	#VALUE!	#VALUE!	#VALUE!	#DIV/0!	#VALUE!	0	#VALUE!	#VALUE!	#VALUE!	#VALUE!	#DIV/0!	#VALUE!
43	features74			3.417												7.49833e+06									1	#DIV/0!	#DIV/0!	#DIV/0!	#DIV/0!	#DIV/0!	#DIV/0!	0	0	#VALUE!	#VALUE!	#VALUE!	#VALUE!	#VALUE!	#VALUE!	0	#VALUE!	#VALUE!	#VALUE!	#VALUE!	#VALUE!	#VALUE!
44	features76			3.559												337319						83507.7			2	#DIV/0!	#DIV/0!	#DIV/0!	1	0	0	1	83507.7	#VALUE!	#VALUE!	#VALUE!	1	#VALUE!	#VALUE!	83507.7	#VALUE!	#VALUE!	#VALUE!	1	#VALUE!	#VALUE!
45	features77			3.6												7.48603e+06								1782.57	2	#DIV/0!	#DIV/0!	#DIV/0!	#DIV/0!	#DIV/0!	1	1	1782.57	#VALUE!	#VALUE!	#VALUE!	#VALUE!	#VALUE!	1	1782.57	#VALUE!	#VALUE!	#VALUE!	#VALUE!	#VALUE!	1
46	features78			3.632												87275.6									1	#DIV/0!	#DIV/0!	#DIV/0!	#DIV/0!	#DIV/0!	#DIV/0!	0	0	#VALUE!	#VALUE!	#VALUE!	#VALUE!	#VALUE!	#VALUE!	0	#VALUE!	#VALUE!	#VALUE!	#VALUE!	#VALUE!	#VALUE!
47	features79			3.654													1120.5		81899.7			569.143		1026.86	4	1	0	0	0.5	0	0.333333	3	569.143	143.9	#VALUE!	#VALUE!	1	#VALUE!	1.80422	83495.7	0.980885	#VALUE!	#VALUE!	0.00681643	#VALUE!	0.0122983
48	features81			3.67												322487									1	#DIV/0!	#DIV/0!	#DIV/0!	#DIV/0!	#DIV/0!	#DIV/0!	0	0	#VALUE!	#VALUE!	#VALUE!	#VALUE!	#VALUE!	#VALUE!	0	#VALUE!	#VALUE!	#VALUE!	#VALUE!	#VALUE!	#VALUE!
49	features82			3.672															960196						1	1	0	0	0	0	0	1	960196	1	#VALUE!	#VALUE!	#VALUE!	#VALUE!	0	960196	1	#VALUE!	#VALUE!	#VALUE!	#VALUE!	0
50	features83			3.672												732376						840973		5708.86	3	#DIV/0!	#DIV/0!	#DIV/0!	1	0	0.5	2	5708.86	#VALUE!	#VALUE!	#VALUE!	147.31	#VALUE!	1	846682	#VALUE!	#VALUE!	#VALUE!	0.993257	#VALUE!	0.00674262
51	features86			3.727																		2.25601e+06			1	#DIV/0!	#DIV/0!	#DIV/0!	1	0	0	1	2.25601e+06	#VALUE!	#VALUE!	#VALUE!	1	0	#VALUE!	2.25601e+06	#VALUE!	#VALUE!	#VALUE!	1	0	#VALUE!
52	features87			3.742												101074								1842.57	2	#DIV/0!	#DIV/0!	#DIV/0!	#DIV/0!	#DIV/0!	1	1	1842.57	#VALUE!	#VALUE!	#VALUE!	#VALUE!	#VALUE!	1	1842.57	#VALUE!	#VALUE!	#VALUE!	#VALUE!	#VALUE!	1
53	features88			3.744												1.13076e+06	1270		812.857		1216.86		865.714		5	1	0	0.5	0	0.333333	0	3	812.857	1	#VALUE!	1.49701	#VALUE!	1.06503	#VALUE!	2895.43	0.280738	#VALUE!	0.420268	#VALUE!	0.298993	#VALUE!
54	features89			3.751												2.27895e+06			3075.71						2	1	0	0	0	0	0	1	3075.71	1	#VALUE!	#VALUE!	#VALUE!	#VALUE!	#VALUE!	3075.71	1	#VALUE!	#VALUE!	#VALUE!	#VALUE!	#VALUE!
55	features91			3.803												1.97193e+06			2503.43			1743.43			3	1	0	0	0.5	0	0	2	1743.43	1.43592	#VALUE!	#VALUE!	1	#VALUE!	#VALUE!	4246.86	0.589478	#VALUE!	#VALUE!	0.410522	#VALUE!	#VALUE!
56	features93			3.839													46339.5		6.44726e+07					353467	3	1	0	0	0	0	0.5	2	353467	182.401	#VALUE!	#VALUE!	#VALUE!	#VALUE!	1	64826074	0.994547	#VALUE!	#VALUE!	#VALUE!	#VALUE!	0.00545254
57	features94			3.867												668633				891.143	337810	561258	16542.3	1960.86	6	#DIV/0!	1	0.5	0.333333	0.25	0.2	5	891.143	#VALUE!	1	379.075	629.819	18.563	2.20038	918462	#VALUE!	0.000970255	0.367799	0.611085	0.0180108	0.00213493
58	features96			3.955															3.37592e+06						1	1	0	0	0	0	0	1	3.37592e+06	1	#VALUE!	#VALUE!	#VALUE!	#VALUE!	0	3.37592e+06	1	#VALUE!	#VALUE!	#VALUE!	#VALUE!	0
59	features98			3.966												16937.3	762				18128.1		613.571		4	#DIV/0!	#DIV/0!	1	0	0.5	0	2	613.571	#VALUE!	0	29.5453	#VALUE!	1	#VALUE!	18741.7	#VALUE!	0	0.967262	#VALUE!	0.0327383	#VALUE!
60	features99			3.981													3579.5					56857.7			2	#DIV/0!	#DIV/0!	#DIV/0!	1	0	0	1	56857.7	#VALUE!	#VALUE!	#VALUE!	1	#VALUE!	#VALUE!	56857.7	#VALUE!	#VALUE!	#VALUE!	1	#VALUE!	#VALUE!
61	features101			4.011															1.69731e+07					82098	2	1	0	0	0	0	0.5	2	82098	206.742	#VALUE!	#VALUE!	#VALUE!	#VALUE!	1	1.70552e+07	0.995186	#VALUE!	#VALUE!	#VALUE!	#VALUE!	0.00481366
62	features102			4.024												126844			12694.9				22663.7		3	1	0	0	0	0.5	0	2	12694.9	1	#VALUE!	#VALUE!	#VALUE!	1.78527	#VALUE!	35358.6	0.359032	#VALUE!	#VALUE!	#VALUE!	0.640968	#VALUE!
63	features103			4.031												1.71505e+06							349.143		2	#DIV/0!	#DIV/0!	#DIV/0!	#DIV/0!	1	0	1	349.143	#VALUE!	#VALUE!	#VALUE!	#VALUE!	1	#VALUE!	349.143	#VALUE!	#VALUE!	#VALUE!	#VALUE!	1	#VALUE!
64	features104			4.053												949376						908715	26499.1		3	#DIV/0!	#DIV/0!	#DIV/0!	1	0.5	0	2	26499.1	#VALUE!	#VALUE!	#VALUE!	34.2923	1	#VALUE!	935215	#VALUE!	#VALUE!	#VALUE!	0.971665	0.0283348	#VALUE!
65	features105			4.057												25924			26673.1		14828.9		22663.7		4	1	0	0.5	0	0.333333	0	3	14828.9	1.79873	0	1	#VALUE!	1.52835	#VALUE!	64165.7	0.415692	0	0.231103	#VALUE!	0.353206	#VALUE!
66	features108			4.111												608760	1364.5				550	1471.71			4	#DIV/0!	#DIV/0!	1	0.5	0	0	2	550	#VALUE!	#VALUE!	1	2.67584	#VALUE!	#VALUE!	2021.71	#VALUE!	#VALUE!	0.272046	0.727954	#VALUE!	#VALUE!
67	features110			4.211													13249					520334	27135.7		3	#DIV/0!	#DIV/0!	#DIV/0!	1	0.5	0	2	27135.7	#VALUE!	#VALUE!	#VALUE!	19.1753	1	#VALUE!	547470	#VALUE!	#VALUE!	#VALUE!	0.950434	0.0495657	#VALUE!
68	features111			4.215																		1.52263e+06			1	#DIV/0!	#DIV/0!	#DIV/0!	1	0	0	1	1.52263e+06	#VALUE!	#VALUE!	#VALUE!	1	#VALUE!	#VALUE!	1.52263e+06	#VALUE!	#VALUE!	#VALUE!	1	#VALUE!	#VALUE!
69	features112			4.227												23767.1						238429	110936		3	#DIV/0!	#DIV/0!	#DIV/0!	1	0.5	0	2	110936	#VALUE!	#VALUE!	#VALUE!	2.14924	1	#VALUE!	349365	#VALUE!	#VALUE!	#VALUE!	0.682463	0.317537	#VALUE!
70	features114			4.294												106885									1	#DIV/0!	#DIV/0!	#DIV/0!	#DIV/0!	#DIV/0!	#DIV/0!	0	0	#VALUE!	#VALUE!	#VALUE!	#VALUE!	#VALUE!	#VALUE!	0	#VALUE!	#VALUE!	#VALUE!	#VALUE!	#VALUE!	#VALUE!
71	features115			4.304												7184.29	1981				518	9072.57			4	#DIV/0!	#DIV/0!	1	0.5	0	0	2	518	#VALUE!	#VALUE!	1	17.5146	#VALUE!	#VALUE!	9590.57	#VALUE!	#VALUE!	0.0540114	0.945989	#VALUE!	#VALUE!
72	features118			4.37													249800		898601						2	1	0	0	0	0	0	1	898601	1	0	0	#VALUE!	#VALUE!	0	898601	1	0	0	#VALUE!	#VALUE!	0
73	features120			4.377													22464		61612.6			2775.71		2414.29	4	1	0	0	0.5	0	0.333333	3	2414.29	25.52	#VALUE!	#VALUE!	1.1497	#VALUE!	1	66802.6	0.922308	#VALUE!	#VALUE!	0.041551	#VALUE!	0.0361406
74	features122			4.453												6538.57	1251.5				1414	31869.7			4	#DIV/0!	#DIV/0!	1	0.5	0	0	2	1414	#VALUE!	#VALUE!	1	22.5387	#VALUE!	#VALUE!	33283.7	#VALUE!	#VALUE!	0.0424832	0.957517	#VALUE!	#VALUE!
75	features125			4.521												461749			22864.3				7394		3	1	0	0	0	0.5	0	2	7394	3.09228	#VALUE!	#VALUE!	#VALUE!	1	#VALUE!	30258.3	0.755637	#VALUE!	#VALUE!	#VALUE!	0.244363	#VALUE!
76	features127			4.526												1.38108e+06						14414			2	#DIV/0!	#DIV/0!	#DIV/0!	1	0	0	1	14414	#VALUE!	#VALUE!	#VALUE!	1	#VALUE!	#VALUE!	14414	#VALUE!	#VALUE!	#VALUE!	1	#VALUE!	#VALUE!
77	features130			4.574												60728.6				696.571		12823.7			3	#DIV/0!	1	0	0.5	0	0	2	696.571	#VALUE!	1	#VALUE!	18.4098	#VALUE!	#VALUE!	13520.3	#VALUE!	0.0515205	#VALUE!	0.94848	#VALUE!	#VALUE!
78	features131			4.627															592.286			11785.4	365.429		3	1	0	0	0.5	0.333333	0	3	365.429	1.6208	#VALUE!	#VALUE!	32.251	1	#VALUE!	12743.1	0.0464788	#VALUE!	#VALUE!	0.924845	0.0286765	#VALUE!
79	features133			4.661																		269034			1	#DIV/0!	#DIV/0!	#DIV/0!	1	0	0	1	269034	#VALUE!	#VALUE!	#VALUE!	1	#VALUE!	#VALUE!	269034	#VALUE!	#VALUE!	#VALUE!	1	#VALUE!	#VALUE!
80	features134			4.664												1.12094e+07	3654						3.29157e+06		3	#DIV/0!	#DIV/0!	#DIV/0!	#DIV/0!	1	0	1	3.29157e+06	#VALUE!	0	#VALUE!	#VALUE!	1	0	3.29157e+06	#VALUE!	0	#VALUE!	#VALUE!	1	0
81	features135			4.671												1.40415e+06									1	#DIV/0!	#DIV/0!	#DIV/0!	#DIV/0!	#DIV/0!	#DIV/0!	0	0	#VALUE!	#DIV/0!	#DIV/0!	#DIV/0!	#DIV/0!	#DIV/0!	0	#VALUE!	#DIV/0!	#DIV/0!	#DIV/0!	#DIV/0!	#DIV/0!
82	features136			4.673												135989	4143.5				1315.71				3	#DIV/0!	#DIV/0!	1	0	0	0	1	1315.71	#VALUE!	#VALUE!	1	#VALUE!	#VALUE!	#VALUE!	1315.71	#VALUE!	#VALUE!	1	#VALUE!	#VALUE!	#VALUE!
83	features138			4.745												118893						105399	38062.9		3	#DIV/0!	#DIV/0!	#DIV/0!	1	0.5	0	2	38062.9	#VALUE!	#VALUE!	#VALUE!	2.76907	1	#VALUE!	143461	#VALUE!	#VALUE!	#VALUE!	0.734682	0.265318	#VALUE!
84	features139			4.747												2453800						552			2	#DIV/0!	#DIV/0!	#DIV/0!	1	0	0	1	552	#VALUE!	#VALUE!	#VALUE!	1	#VALUE!	#VALUE!	552	#VALUE!	#VALUE!	#VALUE!	1	#VALUE!	#VALUE!
85	features140			4.757												121224					23254				2	#DIV/0!	#DIV/0!	1	0	0	0	1	23254	#VALUE!	0	1	#VALUE!	0	#VALUE!	23254	#VALUE!	0	1	#VALUE!	0	#VALUE!
86	features142			4.788												56888.6	145173					531789	208610	61451.2	5	#DIV/0!	#DIV/0!	#DIV/0!	1	0.5	0.333333	3	61451.2	#VALUE!	0	0	8.65383	3.39472	1	801850	#VALUE!	0	0	0.663202	0.260161	0.0766368
87	features143			4.79												33574.3	50454.5		8390.86	1066.86	2939.43	136163	49628.6	10119.4	8	1	0.5	0.333333	0.25	0.2	0.166667	6	1066.86	7.86502	1	2.75522	127.63	46.5185	9.48527	208308	0.040281	0.00512153	0.014111	0.653662	0.238246	0.0485791
88	features144			4.804												117449					1619.14	30264.9	1.61106e+06		4	#DIV/0!	#DIV/0!	1	0.5	0.333333	0	3	1619.14	#VALUE!	#VALUE!	1	18.6919	995.007	#VALUE!	1.64294e+06	#VALUE!	#VALUE!	0.000985514	0.0184211	0.980593	#VALUE!
89	features145			4.824												1.24305e+06	6512.5					301249			3	#DIV/0!	#DIV/0!	#DIV/0!	1	0	0	1	301249	#VALUE!	#VALUE!	#VALUE!	1	#VALUE!	#VALUE!	301249	#VALUE!	#VALUE!	#VALUE!	1	#VALUE!	#VALUE!
90	features146			4.826												2.26575e+06	277622					3.61147e+06	6.74948e+06	302712	5	#DIV/0!	#DIV/0!	#DIV/0!	1	0.5	0.333333	3	302712	#VALUE!	#VALUE!	#VALUE!	11.9304	22.2967	1	1.06637e+07	#VALUE!	#VALUE!	#VALUE!	0.33867	0.632942	0.0283873
91	features148			4.833												2.33705e+06	4748.5								2	#DIV/0!	#DIV/0!	#DIV/0!	#DIV/0!	#DIV/0!	#DIV/0!	0	0	#VALUE!	#VALUE!	#VALUE!	#VALUE!	#VALUE!	#VALUE!	0	#VALUE!	#VALUE!	#VALUE!	#VALUE!	#VALUE!	#VALUE!
92	features149			4.847												347660							151852		2	#DIV/0!	#DIV/0!	#DIV/0!	#DIV/0!	1	0	1	151852	#VALUE!	0	0	0	1	0	151852	#VALUE!	0	0	0	1	0
93	features151			4.853												621043	834					1852			3	#DIV/0!	#DIV/0!	#DIV/0!	1	0	0	1	1852	#VALUE!	#VALUE!	#VALUE!	1	#VALUE!	#VALUE!	1852	#VALUE!	#VALUE!	#VALUE!	1	#VALUE!	#VALUE!
94	features152			4.873												86127.1	38188		1268			722970	2520.57		5	1	0	0	0.5	0.333333	0	3	1268	1	#VALUE!	#VALUE!	570.165	1.98783	#VALUE!	726758	0.00174473	#VALUE!	#VALUE!	0.994787	0.00346824	#VALUE!
95	features153			4.878												231916						38023.7	175346	10785.7	4	#DIV/0!	#DIV/0!	#DIV/0!	1	0.5	0.333333	3	10785.7	#VALUE!	#VALUE!	#VALUE!	3.52538	16.2573	1	224156	#VALUE!	#VALUE!	#VALUE!	0.169631	0.782252	0.0481171
96	features154			4.901												21805.7	7404					3079.71	2086.86		4	#DIV/0!	#DIV/0!	#DIV/0!	1	0.5	0	2	2086.86	#VALUE!	#VALUE!	#VALUE!	1.47577	1	#VALUE!	5166.57	#VALUE!	#VALUE!	#VALUE!	0.596085	0.403915	#VALUE!
97	features159			4.935												198593	3286					335185	1853.43		4	#DIV/0!	#DIV/0!	#DIV/0!	1	0.5	0	2	1853.43	#VALUE!	#VALUE!	#VALUE!	180.846	1	#VALUE!	337038	#VALUE!	#VALUE!	#VALUE!	0.994501	0.00549916	#VALUE!
98	features162			4.948												2.68197e+06						4.17048e+06	6433.14		3	#DIV/0!	#DIV/0!	#DIV/0!	1	0.5	0	2	6433.14	#VALUE!	#VALUE!	#VALUE!	648.281	1	#VALUE!	4.17692e+06	#VALUE!	#VALUE!	#VALUE!	0.99846	0.00154017	#VALUE!
99	features163			4.951												85192.9	11892						12949.1	15646.9	4	#DIV/0!	#DIV/0!	#DIV/0!	#DIV/0!	1	0.5	2	12949.1	#VALUE!	0	0	0	1	1.20833	28596	#VALUE!	0	0	0	0.452831	0.547169
100	features164			4.951												13503.9	6434							9092.71	3	#DIV/0!	#DIV/0!	#DIV/0!	#DIV/0!	#DIV/0!	1	1	9092.71	#VALUE!	#VALUE!	#VALUE!	#VALUE!	0	1	9092.71	#VALUE!	#VALUE!	#VALUE!	#VALUE!	0	1
101	features165			4.952												167707						224499	9785.71		3	#DIV/0!	#DIV/0!	#DIV/0!	1	0.5	0	2	9785.71	#VALUE!	#VALUE!	#VALUE!	22.9415	1	#VALUE!	234285	#VALUE!	#VALUE!	#VALUE!	0.958232	0.0417684	#VALUE!
102	features166			4.995													2333.5			327.143		140244			3	#DIV/0!	1	0	0.5	0	0	2	327.143	#VALUE!	1	#VALUE!	428.693	#VALUE!	#VALUE!	140571	#VALUE!	0.00232725	#VALUE!	0.997673	#VALUE!	#VALUE!
104	features169			5.013											518	167707						169773	3474		3	#DIV/0!	#DIV/0!	#DIV/0!	1	0.5	0	2	3474	#VALUE!	#VALUE!	#VALUE!	48.8695	1	#VALUE!	173247	#VALUE!	#VALUE!	#VALUE!	0.979948	0.0200523	#VALUE!
105	features171			5.016												285630	13527			3084.29		39248.3	115606		5	#DIV/0!	1	0	0.5	0.333333	0	3	3084.29	#VALUE!	1	#VALUE!	12.7252	37.4824	#VALUE!	157939	#VALUE!	0.0195284	#VALUE!	0.248503	0.731969	#VALUE!
106	features173			5.051												120614	1295				9064.86	488813	105339		5	#DIV/0!	#DIV/0!	1	0.5	0.333333	0	3	9064.86	#VALUE!	0	1	53.9239	11.6205	0	603216	#VALUE!	0	0.0150275	0.810344	0.174628	0
107	features175			5.086												5.11138e+06	2265724					5.44447e+06	3805376		4	#DIV/0!	#DIV/0!	#DIV/0!	1	0.5	0	2	3805376	#VALUE!	#VALUE!	#VALUE!	1.43073	1	#VALUE!	9.24985e+06	#VALUE!	#VALUE!	#VALUE!	0.588601	0.411399	#VALUE!
108	features177			5.135															58921.6		22516.4	992039	3471.86		4	1	0	0.5	0.333333	0.25	0	4	3471.86	16.9712	#VALUE!	6.48541	285.737	1	#VALUE!	1.07695e+06	0.0547116	#VALUE!	0.0209076	0.921157	0.00322379	#VALUE!
109	features178			5.14												3197.14						189396			2	#DIV/0!	#DIV/0!	#DIV/0!	1	0	0	1	189396	#VALUE!	#VALUE!	#VALUE!	1	#VALUE!	#VALUE!	189396	#VALUE!	#VALUE!	#VALUE!	1	#VALUE!	#VALUE!
110	features180			5.145																			330367	15564.6	2	#DIV/0!	#DIV/0!	#DIV/0!	#DIV/0!	1	0.5	2	15564.6	#VALUE!	#VALUE!	#VALUE!	#VALUE!	21.2256	1	345932	#VALUE!	#VALUE!	#VALUE!	#VALUE!	0.955007	0.0449932
111	features181			5.167												682647	5624.5					154419	121851		4	#DIV/0!	#DIV/0!	#DIV/0!	1	0.5	0	2	121851	#VALUE!	0	0	1.26727	1	0	276270	#VALUE!	0	0	0.558942	0.441058	0
112	features182			5.209												22548.6				1786.86		11943.1	35404.3	2535.14	5	#DIV/0!	1	0	0.5	0.333333	0.25	4	1786.86	#VALUE!	1	#VALUE!	6.68388	19.8137	1.41877	51669.4	#VALUE!	0.0345825	#VALUE!	0.231145	0.685208	0.0490647
113	features184			5.224												49989.7	957.5		545.429			48106.6	8124.86		5	1	0	0	0.5	0.333333	0	3	545.429	1	#VALUE!	#VALUE!	88.1996	14.8963	#VALUE!	56776.9	0.00960653	#VALUE!	#VALUE!	0.847292	0.143102	#VALUE!
114	features187			5.308												61831.4						17771.7	27358.9		3	#DIV/0!	#DIV/0!	#DIV/0!	1	0.5	0	2	17771.7	#VALUE!	#VALUE!	#VALUE!	1	1.53946	#VALUE!	45130.6	#VALUE!	#VALUE!	#VALUE!	0.393784	0.606216	#VALUE!
115	features188			5.314												2.34185e+06			1572.86	14644.9	2578.86				4	1	0.5	0.333333	0	0	0	3	1572.86	1	9.31099	1.6396	#VALUE!	#VALUE!	#VALUE!	18796.6	0.0836779	0.779124	0.137198	#VALUE!	#VALUE!	#VALUE!
116	features189			5.374												194081						3363.71	5280.29		3	#DIV/0!	#DIV/0!	#DIV/0!	1	0.5	0	2	3363.71	#VALUE!	#VALUE!	#VALUE!	1	1.56978	#VALUE!	8644	#VALUE!	#VALUE!	#VALUE!	0.389139	0.610861	#VALUE!
117	features190			5.386												398074	39804						442947	10383.1	4	#DIV/0!	#DIV/0!	#DIV/0!	#DIV/0!	1	0.5	2	10383.1	#VALUE!	#VALUE!	#VALUE!	#VALUE!	42.6602	1	453331	#VALUE!	#VALUE!	#VALUE!	#VALUE!	0.977096	0.0229041
118	features192			5.407												58070						37647.4	89887.4		3	#DIV/0!	#DIV/0!	#DIV/0!	1	0.5	0	2	37647.4	#VALUE!	#VALUE!	#VALUE!	1	2.38761	#VALUE!	127535	#VALUE!	#VALUE!	#VALUE!	0.295193	0.704807	#VALUE!
119	features193			5.408												63865.7	162555					374728	17204.9		4	#DIV/0!	#DIV/0!	#DIV/0!	1	0.5	0	2	17204.9	#VALUE!	#VALUE!	#VALUE!	21.7803	1	#VALUE!	391933	#VALUE!	#VALUE!	#VALUE!	0.956103	0.0438975	#VALUE!
120	features194			5.413												202464						69417.6			2	#DIV/0!	#DIV/0!	#DIV/0!	1	0	0	1	69417.6	#VALUE!	#VALUE!	0	1	#VALUE!	#VALUE!	69417.6	#VALUE!	#VALUE!	0	1	#VALUE!	#VALUE!
121	features195			5.416												4.85565e+06	12442.5					2.88261e+06			3	#DIV/0!	#DIV/0!	#DIV/0!	1	0	0	1	2.88261e+06	#VALUE!	#VALUE!	#VALUE!	1	#VALUE!	#VALUE!	2.88261e+06	#VALUE!	#VALUE!	#VALUE!	1	#VALUE!	#VALUE!
122	features196			5.426																	6247.86	97045.6			2	#DIV/0!	#DIV/0!	1	0.5	0	0	2	6247.86	#VALUE!	0	1	15.5326	#VALUE!	#VALUE!	103293	#VALUE!	0	0.0604865	0.939514	#VALUE!	#VALUE!
124	features198			5.445												576129						32132			2	#DIV/0!	#DIV/0!	#DIV/0!	1	0	0	1	32132	#VALUE!	#VALUE!	#VALUE!	1	#VALUE!	#VALUE!	32132	#VALUE!	#VALUE!	#VALUE!	1	#VALUE!	#VALUE!
125	features199			5.445												313623						97045.6			2	#DIV/0!	#DIV/0!	#DIV/0!	1	0	0	1	97045.6	#VALUE!	#VALUE!	#VALUE!	1	0	#VALUE!	97045.6	#VALUE!	#VALUE!	#VALUE!	1	0	#VALUE!
126	features200			5.448												1193240	119818						395365		3	#DIV/0!	#DIV/0!	#DIV/0!	#DIV/0!	1	0	1	395365	#VALUE!	#VALUE!	#VALUE!	#VALUE!	1	#VALUE!	395365	#VALUE!	#VALUE!	#VALUE!	#VALUE!	1	#VALUE!
127	features201			5.449												973193						524481			2	#DIV/0!	#DIV/0!	#DIV/0!	1	0	0	1	524481	#VALUE!	#VALUE!	#VALUE!	1	#VALUE!	#VALUE!	524481	#VALUE!	#VALUE!	#VALUE!	1	#VALUE!	#VALUE!
128	features202			5.452												151512950			123564		996307	6.53295e+07			4	1	0	0.5	0.333333	0	0	3	123564	1	#VALUE!	8.06309	528.71	#VALUE!	#VALUE!	66449376	0.00185952	#VALUE!	0.0149935	0.983147	#VALUE!	#VALUE!
129	features203			5.454												323655	1028.5				28947.9	33489.9	1354.71		5	#DIV/0!	#DIV/0!	1	0.5	0.333333	0	3	1354.71	#VALUE!	#VALUE!	21.3682	24.721	1	#VALUE!	63792.4	#VALUE!	#VALUE!	0.453782	0.524982	0.0212363	#VALUE!
130	features204			5.481															5768.29			493652			2	1	0	0	0.5	0	0	2	5768.29	1	0	#VALUE!	85.5804	#VALUE!	0	499420	0.01155	0	#VALUE!	0.98845	#VALUE!	0
131	features205			5.486												10143250						1502220			2	#DIV/0!	#DIV/0!	#DIV/0!	1	0	0	1	1502220	#VALUE!	#VALUE!	#VALUE!	1	#VALUE!	#VALUE!	1502220	#VALUE!	#VALUE!	#VALUE!	1	#VALUE!	#VALUE!
132	features206			5.506												3.44157e+06	2345704		128682			2.02438e+07	1.2978e+07	5478.71	6	1	0	0	0.5	0.333333	0.25	4	5478.71	23.4876	0	0	3694.99	2368.81	1	3.3356e+07	0.00385783	0	0	0.606902	0.389076	0.00016425
133	features207			5.513												67742.9					2238.86	28883.4			3	#DIV/0!	#DIV/0!	1	0.5	0	0	2	2238.86	#VALUE!	#VALUE!	1	12.901	#VALUE!	#VALUE!	31122.3	#VALUE!	#VALUE!	0.0719374	0.928063	#VALUE!	#VALUE!
134	features208			5.517												512093					26374.9	75865.7	22023.7		4	#DIV/0!	#DIV/0!	1	0.5	0.333333	0	3	22023.7	#VALUE!	#VALUE!	1.19757	3.44473	1	#VALUE!	124264	#VALUE!	#VALUE!	0.212248	0.610519	0.177233	#VALUE!
135	features211			5.573												4282.86					81122.3	278068			3	#DIV/0!	#DIV/0!	1	0.5	0	0	2	81122.3	#VALUE!	#VALUE!	1	3.42776	#VALUE!	#VALUE!	359190	#VALUE!	#VALUE!	0.225848	0.774152	#VALUE!	#VALUE!
136	features212			5.59												230324					32224	36721.4	3298.86		4	#DIV/0!	#DIV/0!	1	0.5	0.333333	0	3	3298.86	#VALUE!	0	9.76823	11.1316	1	#VALUE!	72244.3	#VALUE!	0	0.446042	0.508295	0.0456625	#VALUE!
137	features214			5.644												582133						146095			2	#DIV/0!	#DIV/0!	#DIV/0!	1	0	0	1	146095	#VALUE!	#VALUE!	#VALUE!	1	#VALUE!	#VALUE!	146095	#VALUE!	#VALUE!	#VALUE!	1	#VALUE!	#VALUE!
138	features216			5.664												213256	208504					138966	103214	4614.57	5	#DIV/0!	#DIV/0!	#DIV/0!	1	0.5	0.333333	3	4614.57	#VALUE!	#VALUE!	#VALUE!	30.1145	22.3669	1	246794	#VALUE!	#VALUE!	#VALUE!	0.563084	0.418218	0.0186981
139	features217			5.669												199893	256322		6873.14	1645.43		95650	78511.4	5388	7	1	0.5	0	0.333333	0.25	0.2	5	1645.43	4.17711	1	#VALUE!	58.1308	47.7149	3.27453	188068	0.0365461	0.00874912	#VALUE!	0.508593	0.417463	0.0286492
140	features218			5.684												540071			4768.86			196899			3	1	0	0	0.5	0	0	2	4768.86	1	#VALUE!	#VALUE!	41.2885	#VALUE!	#VALUE!	201668	0.0236471	#VALUE!	#VALUE!	0.976353	#VALUE!	#VALUE!
141	features220			5.707												519664			2.81503e+06			4936	57334.3		4	1	0	0	0.5	0.333333	0	3	4936	570.305	#VALUE!	#VALUE!	1	11.6155	#VALUE!	2877296	0.978358	#VALUE!	#VALUE!	0.0017155	0.0199264	#VALUE!
143	features227			5.784												121413			7795.14			23398			3	1	0	0	0.5	0	0	2	7795.14	1	#VALUE!	#VALUE!	3.00161	#VALUE!	#VALUE!	31193.1	0.249899	#VALUE!	#VALUE!	0.750101	#VALUE!	#VALUE!
144	features228			5.791												934690				1949.43					2	#DIV/0!	1	0	0	0	0	1	1949.43	#VALUE!	1	#VALUE!	#VALUE!	#VALUE!	#VALUE!	1949.43	#VALUE!	1	#VALUE!	#VALUE!	#VALUE!	#VALUE!
145	features230			5.808												1.48592e+06			66713.1			309407	31156.9		4	1	0	0	0.5	0.333333	0	3	31156.9	2.1412	#VALUE!	#VALUE!	9.93062	1	#VALUE!	407277	0.163803	#VALUE!	#VALUE!	0.759697	0.0765004	#VALUE!
146	features232			5.822												501229			13205.4						2	1	0	0	0	0	0	1	13205.4	1	#VALUE!	#VALUE!	#VALUE!	#VALUE!	#VALUE!	13205.4	1	#VALUE!	#VALUE!	#VALUE!	#VALUE!	#VALUE!
147	features233			5.831												6.00125e+06			28375.9			1.73274e+06			3	1	0	0	0.5	0	0	2	28375.9	1	#VALUE!	#VALUE!	61.0637	#VALUE!	#VALUE!	1.76111e+06	0.0161125	#VALUE!	#VALUE!	0.983888	#VALUE!	#VALUE!
148	features234			5.833											380	934690						331827	3558		3	#DIV/0!	#DIV/0!	#DIV/0!	1	0.5	0	2	3558	#VALUE!	#VALUE!	#VALUE!	93.2623	1	#VALUE!	335385	#VALUE!	#VALUE!	#VALUE!	0.989391	0.0106087	#VALUE!
149	features236			5.876												238251						59367.7	3756.86		3	#DIV/0!	#DIV/0!	#DIV/0!	1	0.5	0	2	3756.86	#VALUE!	#VALUE!	#VALUE!	15.8025	1	#VALUE!	63124.6	#VALUE!	#VALUE!	#VALUE!	0.940485	0.059515	#VALUE!
150	features237			5.881															62614.3			625.143			2	1	0	0	0.5	0	0	2	625.143	100.16	#VALUE!	#VALUE!	1	#VALUE!	#VALUE!	63239.4	0.990115	#VALUE!	#VALUE!	0.00988533	#VALUE!	#VALUE!
151	features238			5.887															352777			12879.4			2	1	0	0	0.5	0	0	2	12879.4	27.3907	#VALUE!	#VALUE!	1	#VALUE!	#VALUE!	365657	0.964777	#VALUE!	#VALUE!	0.0352227	#VALUE!	#VALUE!
152	features240			5.896															140811			2386.29	4334.86		3	1	0	0	0.5	0.333333	0	3	2386.29	59.0083	#VALUE!	#VALUE!	1	1.81657	#VALUE!	147532	0.954443	#VALUE!	#VALUE!	0.0161747	0.0293825	#VALUE!
153	features241			5.899															3.7348e+06						1	1	0	0	0	0	0	1	3.7348e+06	1	0	#VALUE!	0	#VALUE!	0	3.7348e+06	1	0	#VALUE!	0	#VALUE!	0
154	features243			5.914												542493			14272.9			225197	4391.14		4	1	0	0	0.5	0.333333	0	3	4391.14	3.25037	#VALUE!	#VALUE!	51.2844	1	#VALUE!	243861	0.0585286	#VALUE!	#VALUE!	0.923465	0.0180067	#VALUE!
155	features244			5.916												470494						102721	298573		3	#DIV/0!	#DIV/0!	#DIV/0!	1	0.5	0	2	102721	#VALUE!	#VALUE!	#VALUE!	1	2.90662	#VALUE!	401294	#VALUE!	#VALUE!	#VALUE!	0.255975	0.744025	#VALUE!
156	features245			5.918												633454						93311.7	18070.6		3	#DIV/0!	#DIV/0!	#DIV/0!	1	0.5	0	2	18070.6	#VALUE!	#VALUE!	#VALUE!	5.16374	1	#VALUE!	111382	#VALUE!	#VALUE!	#VALUE!	0.837761	0.162239	#VALUE!
157	features247			5.921															739848					1550.93	2	1	0	0	0	0	0.5	2	1550.93	477.035	#VALUE!	#VALUE!	#VALUE!	#VALUE!	1	741398	0.997908	#VALUE!	#VALUE!	#VALUE!	#VALUE!	0.0020919
158	features249			5.949												611706	10545					16746.9	101687		4	#DIV/0!	#DIV/0!	#DIV/0!	1	0.5	0	2	16746.9	#VALUE!	#VALUE!	#VALUE!	1	6.07201	#VALUE!	118434	#VALUE!	#VALUE!	#VALUE!	0.141402	0.858598	#VALUE!
159	features250			5.951															1.76731e+06			179661		168851	3	1	0	0	0.5	0	0.333333	3	168851	10.4667	0	0	1.06402	0	1	2.11582e+06	0.835283	0	0	0.0849128	0	0.0798039
160	features252			5.992												343832	43888.5		1.39825e+06			154095	70821.4	50193.1	6	1	0	0	0.5	0.333333	0.25	4	50193.1	27.8574	0	0	3.07005	1.41098	1	1.67336e+06	0.835594	0	0	0.0920876	0.0423229	0.0299954
161	features253			5.998													13010.5		264814						2	1	0	0	0	0	0	1	264814	1	#VALUE!	#VALUE!	0	#VALUE!	0	264814	1	#VALUE!	#VALUE!	0	#VALUE!	0
162	features255			6.016															3.50587e+06						1	1	0	0	0	0	0	1	3.50587e+06	1	0	#VALUE!	#VALUE!	#VALUE!	0	3.50587e+06	1	0	#VALUE!	#VALUE!	#VALUE!	0
163	features256			6.019												592200	146468					744282	1909055		4	#DIV/0!	#DIV/0!	#DIV/0!	1	0.5	0	2	744282	#VALUE!	#VALUE!	#VALUE!	1	2.56496	#VALUE!	2.65334e+06	#VALUE!	#VALUE!	#VALUE!	0.280508	0.719492	#VALUE!
164	features257			6.033												609014	235718					209909	854818	3855.71	5	#DIV/0!	#DIV/0!	#DIV/0!	1	0.5	0.333333	3	3855.71	#VALUE!	0	#VALUE!	54.4411	221.702	1	1.06858e+06	#VALUE!	0	#VALUE!	0.196437	0.799955	0.00360825
165	features258			6.039												2.0595e+06	553068			732.571		1.7283e+06	2.79315e+06		5	#DIV/0!	1	0	0.5	0.333333	0	3	732.571	#VALUE!	1	#VALUE!	2359.23	3812.8	#VALUE!	4.52218e+06	#VALUE!	0.000161995	#VALUE!	0.382184	0.617654	#VALUE!
166	features260			6.046												1217060						191325	7157.71		3	#DIV/0!	#DIV/0!	#DIV/0!	1	0.5	0	2	7157.71	#VALUE!	#VALUE!	#VALUE!	26.7299	1	#VALUE!	198483	#VALUE!	#VALUE!	#VALUE!	0.963938	0.0360622	#VALUE!
167	features261			6.052												355204				384.571		134745	920		4	#DIV/0!	1	0	0.5	0.333333	0	3	384.571	#VALUE!	1	#VALUE!	350.378	2.39227	#VALUE!	136050	#VALUE!	0.00282669	#VALUE!	0.990411	0.00676222	#VALUE!
168	features264			6.094											123	281371	44417.5						93848.1	51493	4	#DIV/0!	#DIV/0!	#DIV/0!	#DIV/0!	1	0.5	2	51493	#VALUE!	0	0	#VALUE!	1.82254	1	145341	#VALUE!	0	0	#VALUE!	0.645709	0.354291
169	features265			6.118												8843						6758.14			2	#DIV/0!	#DIV/0!	#DIV/0!	1	0	0	1	6758.14	#VALUE!	0	#VALUE!	1	0	0	6758.14	#VALUE!	0	#VALUE!	1	0	0
170	features266			6.122												5.96749e+06	696812					1.76639e+06	771506	1.1248e+06	5	#DIV/0!	#DIV/0!	#DIV/0!	1	0.5	0.333333	3	771506	#VALUE!	0	0	2.28954	1	1.45793	3.6627e+06	#VALUE!	0	0	0.482265	0.210639	0.307096
171	features268			6.163												110513						39280.4			2	#DIV/0!	#DIV/0!	#DIV/0!	1	0	0	1	39280.4	#VALUE!	#VALUE!	0	1	#VALUE!	0	39280.4	#VALUE!	#VALUE!	0	1	#VALUE!	0
172	features269			6.201												1.21717e+06						402634			2	#DIV/0!	#DIV/0!	#DIV/0!	1	0	0	1	402634	#VALUE!	#VALUE!	#VALUE!	1	#VALUE!	#VALUE!	402634	#VALUE!	#VALUE!	#VALUE!	1	#VALUE!	#VALUE!
174	features277			6.319												1.02551e+06	2339.5		88559.7			369247			4	1	0	0	0.5	0	0	2	88559.7	1	#VALUE!	#VALUE!	4.16947	#VALUE!	#VALUE!	457807	0.193443	#VALUE!	#VALUE!	0.806557	#VALUE!	#VALUE!
176	features279			6.328												122093			15831.7			10583.4	9124		4	1	0	0	0.5	0.333333	0	3	9124	1.73517	#VALUE!	#VALUE!	1.15995	1	#VALUE!	35539.1	0.445473	#VALUE!	#VALUE!	0.297796	0.256731	#VALUE!
177	features281			6.341													8990.5					9218.57	50201.4		3	#DIV/0!	#DIV/0!	#DIV/0!	1	0.5	0	2	9218.57	#VALUE!	0	0	1	5.44568	0	59420	#VALUE!	0	0	0.155143	0.844857	0
178	features282			6.346												232469					1901.43	75370			3	#DIV/0!	#DIV/0!	1	0.5	0	0	2	1901.43	#VALUE!	#VALUE!	1	39.6386	#VALUE!	#VALUE!	77271.4	#VALUE!	#VALUE!	0.0246071	0.975393	#VALUE!	#VALUE!
179	features283			6.368												3.11762e+06	13138			381.714	2098	725869	9238.29		6	#DIV/0!	1	0.5	0.333333	0.25	0	4	381.714	#VALUE!	1	5.49626	1901.6	24.2021	#VALUE!	737587	#VALUE!	0.000517518	0.00284441	0.984113	0.012525	#VALUE!
180	features284			6.371												2.74659e+06						275357			2	#DIV/0!	#DIV/0!	#DIV/0!	1	0	0	1	275357	#VALUE!	#VALUE!	#VALUE!	1	#VALUE!	#VALUE!	275357	#VALUE!	#VALUE!	#VALUE!	1	#VALUE!	#VALUE!
181	features287			6.393															2630.14			292328	2.21338e+06		3	1	0	0	0.5	0.333333	0	3	2630.14	1	0	#VALUE!	111.145	841.545	#VALUE!	2.50834e+06	0.00104856	0	#VALUE!	0.116542	0.882409	#VALUE!
182	features288			6.395											489						62366.3	5.05878e+06			2	#DIV/0!	#DIV/0!	1	0.5	0	0	2	62366.3	#VALUE!	#VALUE!	1	81.114	#VALUE!	#VALUE!	5.12115e+06	#VALUE!	#VALUE!	0.0121782	0.987822	#VALUE!	#VALUE!
183	features291			6.428												972300						231295			2	#DIV/0!	#DIV/0!	#DIV/0!	1	0	0	1	231295	#VALUE!	#VALUE!	#VALUE!	1	#VALUE!	#VALUE!	231295	#VALUE!	#VALUE!	#VALUE!	1	#VALUE!	#VALUE!
184	features292			6.435												548207						73587.1	116873		3	#DIV/0!	#DIV/0!	#DIV/0!	1	0.5	0	2	73587.1	#VALUE!	#VALUE!	#VALUE!	1	1.58823	#VALUE!	190460	#VALUE!	#VALUE!	#VALUE!	0.386365	0.613635	#VALUE!
185	features293			6.44												209113							749631		2	#DIV/0!	#DIV/0!	#DIV/0!	#DIV/0!	1	0	1	749631	#VALUE!	#VALUE!	#VALUE!	#VALUE!	1	#VALUE!	749631	#VALUE!	#VALUE!	#VALUE!	#VALUE!	1	#VALUE!
186	features294			6.443												1.32053e+06					274.571	540279			3	#DIV/0!	#DIV/0!	1	0.5	0	0	2	274.571	#VALUE!	#VALUE!	1	1967.72	#VALUE!	#VALUE!	540554	#VALUE!	#VALUE!	0.000507945	0.999492	#VALUE!	#VALUE!
187	features295			6.454															5894.29		8781.71	57267.1			3	1	0	0.5	0.333333	0	0	3	5894.29	1	#VALUE!	1.48987	9.71571	#VALUE!	#VALUE!	71943.1	0.0819298	#VALUE!	0.122065	0.796006	#VALUE!	#VALUE!
188	features297			6.484												1.45082e+06						452706			2	#DIV/0!	#DIV/0!	#DIV/0!	1	0	0	1	452706	#VALUE!	#VALUE!	#VALUE!	1	#VALUE!	#VALUE!	452706	#VALUE!	#VALUE!	#VALUE!	1	#VALUE!	#VALUE!
189	features298			6.486												771536						72513.1			2	#DIV/0!	#DIV/0!	#DIV/0!	1	0	0	1	72513.1	#VALUE!	#VALUE!	#VALUE!	1	#VALUE!	#VALUE!	72513.1	#VALUE!	#VALUE!	#VALUE!	1	#VALUE!	#VALUE!
190	features299			6.495												3.31723e+08	179254		246768	409300	2.18558e+07	117034151	915142		7	1	0.5	0.333333	0.25	0.2	0	5	246768	1	1.65864	88.5681	474.267	3.7085	#VALUE!	1.40461e+08	0.00175684	0.00291397	0.1556	0.833214	0.00651526	#VALUE!
191	features300			6.501												1.59578e+07			10080.3		454475	5.40817e+06			4	1	0	0.5	0.333333	0	0	3	10080.3	1	#VALUE!	45.0856	536.509	#VALUE!	#VALUE!	5872722	0.00171646	#VALUE!	0.0773875	0.920896	#VALUE!	#VALUE!
192	features301			6.506												1.26919e+07					5463.43	3.06588e+06	102817		4	#DIV/0!	#DIV/0!	1	0.5	0.333333	0	3	5463.43	#VALUE!	#VALUE!	1	561.164	18.8191	#VALUE!	3.17416e+06	#VALUE!	#VALUE!	0.00172122	0.965887	0.0323918	#VALUE!
193	features302			6.524												2.08255e+06						205312	1.22385e+06		3	#DIV/0!	#DIV/0!	#DIV/0!	1	0.5	0	2	205312	#VALUE!	#VALUE!	#VALUE!	1	5.96092	#VALUE!	1.42916e+06	#VALUE!	#VALUE!	#VALUE!	0.143659	0.856341	#VALUE!
194	features303			6.529													9619.5				124833	390533			3	#DIV/0!	#DIV/0!	1	0.5	0	0	2	124833	#VALUE!	#VALUE!	1	3.12844	#VALUE!	#VALUE!	515366	#VALUE!	#VALUE!	0.242222	0.757778	#VALUE!	#VALUE!
195	features305			6.555												197812480	27858			150380	1.21231e+07	7.20685e+07	416462		6	#DIV/0!	1	0.5	0.333333	0.25	0	4	150380	#VALUE!	1	80.6167	479.243	2.7694	#VALUE!	8.47584e+07	#VALUE!	0.00177422	0.143031	0.850281	0.00491352	#VALUE!
196	features306			6.557												7.96076e+07			48190		4393734	3.59631e+07	146679		5	1	0	0.5	0.333333	0.25	0	4	48190	1	#VALUE!	91.1752	746.277	3.04376	#VALUE!	4.05517e+07	0.00118836	#VALUE!	0.108349	0.886846	0.00361708	#VALUE!
197	features313			6.624												483577						180014	52481.7		3	#DIV/0!	#DIV/0!	#DIV/0!	1	0.5	0	2	52481.7	#VALUE!	#VALUE!	#VALUE!	3.43003	1	#VALUE!	232496	#VALUE!	#VALUE!	#VALUE!	0.774268	0.225732	#VALUE!
198	features314			6.637												1.63508e+06			4369.14			623234	16600.3		4	1	0	0	0.5	0.333333	0	3	4369.14	1	#VALUE!	#VALUE!	142.644	3.79944	#VALUE!	644203	0.00678224	#VALUE!	#VALUE!	0.967449	0.0257687	#VALUE!
199	features315			6.642													12381.5		4725.71			66664.3	223560	12441.1	5	1	0	0	0.5	0.333333	0.25	4	4725.71	1	#VALUE!	#VALUE!	14.1067	47.3071	2.63265	307391	0.0153736	#VALUE!	#VALUE!	0.216871	0.727282	0.0404733
200	features317			6.66												388564						189009	10206.3		3	#DIV/0!	#DIV/0!	#DIV/0!	1	0.5	0	2	10206.3	#VALUE!	#VALUE!	#VALUE!	18.5189	1	#VALUE!	199215	#VALUE!	#VALUE!	#VALUE!	0.948768	0.0512325	#VALUE!
201	features319			6.669												3.52528e+06	38715.5		330565		76048	438125			5	1	0	0.5	0.333333	0	0	3	76048	4.3468	#VALUE!	1	5.76116	#VALUE!	#VALUE!	844738	0.391323	#VALUE!	0.0900255	0.518652	#VALUE!	#VALUE!
202	features320			6.673												159881						160710	200304		3	#DIV/0!	#DIV/0!	#DIV/0!	1	0.5	0	2	160710	#VALUE!	#VALUE!	#VALUE!	1	1.24637	#VALUE!	361014	#VALUE!	#VALUE!	#VALUE!	0.445162	0.554838	#VALUE!
203	features321			6.674												8.1074e+06						915577	96773.4		3	#DIV/0!	#DIV/0!	#DIV/0!	1	0.5	0	2	96773.4	#VALUE!	#VALUE!	#VALUE!	9.46104	1	#VALUE!	1.01235e+06	#VALUE!	#VALUE!	#VALUE!	0.904407	0.0955928	#VALUE!
204	features323			6.694												12254.1			52014.7			53028.4	59563		4	1	0	0	0.5	0.333333	0	3	52014.7	1	#VALUE!	#VALUE!	1.01949	1.14512	#VALUE!	164606	0.315995	#VALUE!	#VALUE!	0.322153	0.361852	#VALUE!
205	features324			6.7												4.505e+06						394014	91164		3	#DIV/0!	#DIV/0!	#DIV/0!	1	0.5	0	2	91164	#VALUE!	#VALUE!	0	4.32204	1	#VALUE!	485178	#VALUE!	#VALUE!	0	0.812102	0.187898	#VALUE!
206	features325			6.703												714371			36206.6			301477	6750		4	1	0	0	0.5	0.333333	0	3	6750	5.36394	#VALUE!	#VALUE!	44.6633	1	#VALUE!	344434	0.105119	#VALUE!	#VALUE!	0.875283	0.0195974	#VALUE!
207	features326			6.711												83557.1	11999				260.571	367603	713805	479.714	6	#DIV/0!	#DIV/0!	1	0.5	0.333333	0.25	4	260.571	#VALUE!	#VALUE!	1	1410.76	2739.38	1.84101	1.08215e+06	#VALUE!	#VALUE!	0.000240791	0.339697	0.659619	0.000443298
208	features327			6.72												10248.6	16671		286402	42000.3	41807.7		121764	22052.3	7	1	0.5	0.333333	0	0.25	0.2	5	22052.3	12.9874	1.90458	1.89584	#VALUE!	5.5216	1	514026	0.557174	0.0817085	0.0813339	#VALUE!	0.236883	0.0429011
209	features328			6.725												618756	279588		1.75523e+06	348756	160575	1.80403e+06	1.45758e+06	287878	8	1	0.5	0.333333	0.25	0.2	0.166667	6	160575	10.9309	2.17192	1	11.2349	9.07726	1.7928	5.81405e+06	0.301895	0.0599851	0.0276184	0.310289	0.250699	0.0495141
210	features329			6.73												3144.29	2622.5		4838.86		570.857	5895.71		4658.57	6	1	0	0.5	0.333333	0	0.25	4	570.857	8.47648	#VALUE!	1	10.3278	#VALUE!	8.16066	15964	0.303111	#VALUE!	0.035759	0.369313	#VALUE!	0.291817
211	features330			6.747												101289			53924			66845.4	243159		4	1	0	0	0.5	0.333333	0	3	53924	1	#VALUE!	#VALUE!	1.23962	4.5093	#VALUE!	363929	0.148172	#VALUE!	#VALUE!	0.183677	0.668151	#VALUE!
212	features331			6.749												767417			11806.3			302045	8179.43		4	1	0	0	0.5	0.333333	0	3	8179.43	1.44341	#VALUE!	#VALUE!	36.9274	1	#VALUE!	322031	0.0366619	#VALUE!	#VALUE!	0.937939	0.0253995	#VALUE!
213	features332			6.762												313323						132767	14863.1		3	#DIV/0!	#DIV/0!	#DIV/0!	1	0.5	0	2	14863.1	#VALUE!	#VALUE!	#VALUE!	8.93264	1	#VALUE!	147630	#VALUE!	#VALUE!	#VALUE!	0.899322	0.100678	#VALUE!
214	features333			6.764																		238904			1	#DIV/0!	#DIV/0!	#DIV/0!	1	0	0	1	238904	#VALUE!	#VALUE!	#VALUE!	1	#VALUE!	0	238904	#VALUE!	#VALUE!	#VALUE!	1	#VALUE!	0
215	features336			6.788												18570520	29651.5		4934		19210.9	5.75554e+06			5	1	0	0.5	0.333333	0	0	3	4934	1	#VALUE!	3.89357	1166.51	#VALUE!	#VALUE!	5779688	0.000853679	#VALUE!	0.00332386	0.995822	#VALUE!	#VALUE!
216	features337			6.795												247677	5486					66609.4			3	#DIV/0!	#DIV/0!	#DIV/0!	1	0	0	1	66609.4	#VALUE!	#VALUE!	#VALUE!	1	#VALUE!	#VALUE!	66609.4	#VALUE!	#VALUE!	#VALUE!	1	#VALUE!	#VALUE!
217	features338			6.8															669029						1	1	0	0	0	0	0	1	669029	1	#VALUE!	#VALUE!	#VALUE!	#VALUE!	#VALUE!	669029	1	#VALUE!	#VALUE!	#VALUE!	#VALUE!	#VALUE!
218	features340			6.804												326580	7517					295519	14616.6		4	#DIV/0!	#DIV/0!	#DIV/0!	1	0.5	0	2	14616.6	#VALUE!	#VALUE!	#VALUE!	20.218	1	#VALUE!	310135	#VALUE!	#VALUE!	#VALUE!	0.95287	0.0471297	#VALUE!
219	features341			6.805												12204.7							15907.6		2	#DIV/0!	#DIV/0!	#DIV/0!	#DIV/0!	1	0	1	15907.6	#VALUE!	#VALUE!	#VALUE!	#VALUE!	1	#VALUE!	15907.6	#VALUE!	#VALUE!	#VALUE!	#VALUE!	1	#VALUE!
220	features342			6.811													3158.5		46875.7	334	493.143		36546.9		5	1	0.5	0.333333	0	0.25	0	4	334	140.346	1	1.47648	#VALUE!	109.422	#VALUE!	84249.7	0.55639	0.00396441	0.00585335	#VALUE!	0.433792	#VALUE!
221	features343			6.814											991				13441.4				1.03471e+07	5037.43	3	1	0	0	0	0.5	0.333333	3	5037.43	2.66831	#VALUE!	#VALUE!	#VALUE!	2054.05	1	1.03656e+07	0.00129673	#VALUE!	#VALUE!	#VALUE!	0.998217	0.000485975
222	features344			6.816													47687		1220724			1.50066e+06	38679.4		4	1	0	0	0.5	0.333333	0	3	38679.4	31.56	#VALUE!	#VALUE!	38.7974	1	#VALUE!	2.76007e+06	0.442281	#VALUE!	#VALUE!	0.543705	0.014014	#VALUE!
223	features345			6.827											1991	336690						140887	25029.4		3	#DIV/0!	#DIV/0!	#DIV/0!	1	0.5	0	2	25029.4	#VALUE!	#VALUE!	#VALUE!	5.62886	1	#VALUE!	165917	#VALUE!	#VALUE!	#VALUE!	0.849144	0.150856	#VALUE!
224	features346			6.829												254846	5145.5				1864	104067	1093.71		5	#DIV/0!	#DIV/0!	1	0.5	0.333333	0	3	1093.71	#VALUE!	#VALUE!	1.70428	95.1502	1	#VALUE!	107025	#VALUE!	#VALUE!	0.0174165	0.972364	0.0102193	#VALUE!
225	features347			6.837																	5448	103736	86808.3		3	#DIV/0!	#DIV/0!	1	0.5	0.333333	0	3	5448	#VALUE!	#VALUE!	1	19.0411	15.934	#VALUE!	195992	#VALUE!	#VALUE!	0.0277971	0.529285	0.442917	#VALUE!
226	features349			6.853												1.03399e+06	480433			532958	850716	2.27757e+06	738191		6	#DIV/0!	1	0.5	0.333333	0.25	0	4	532958	#VALUE!	1	1.59622	4.27346	1.38508	#VALUE!	4.39944e+06	#VALUE!	0.121142	0.193369	0.517696	0.167792	#VALUE!
227	features350			6.86												261179						150630	3196.29		3	#DIV/0!	#DIV/0!	#DIV/0!	1	0.5	0	2	3196.29	#VALUE!	#VALUE!	#VALUE!	47.1266	1	#VALUE!	153826	#VALUE!	#VALUE!	#VALUE!	0.979221	0.0207785	#VALUE!
228	features351			6.876												262364	172050			196058	561870	1.28934e+06	1.96492e+06	141108	7	#DIV/0!	1	0.5	0.333333	0.25	0.2	5	141108	#VALUE!	1.38941	3.98184	9.13728	13.9249	1	4.1533e+06	#VALUE!	0.0472053	0.135283	0.310439	0.473098	0.033975
229	features353			6.89												5.87566e+06							2603114		2	#DIV/0!	#DIV/0!	#DIV/0!	#DIV/0!	1	0	1	2603114	#VALUE!	#VALUE!	#VALUE!	#VALUE!	1	#VALUE!	2603114	#VALUE!	#VALUE!	#VALUE!	#VALUE!	1	#VALUE!
230	features354			6.912													6560.5		1148.86			99298	825000		4	1	0	0	0.5	0.333333	0	3	1148.86	1	#VALUE!	#VALUE!	86.432	718.105	#VALUE!	925447	0.00124141	#VALUE!	#VALUE!	0.107297	0.891461	#VALUE!
231	features355			6.919																		28198.9			1	#DIV/0!	#DIV/0!	#DIV/0!	1	0	0	1	28198.9	#VALUE!	0	0	1	#VALUE!	#VALUE!	28198.9	#VALUE!	0	0	1	#VALUE!	#VALUE!
232	features356			6.921												8580	4217				2928.57	32673.4			4	#DIV/0!	#DIV/0!	1	0.5	0	0	2	2928.57	#VALUE!	#VALUE!	1	11.1568	#VALUE!	#VALUE!	35602	#VALUE!	#VALUE!	0.0822586	0.917741	#VALUE!	#VALUE!
233	features357			6.926												177713	1684.5					117931	748.857	1470.57	5	#DIV/0!	#DIV/0!	#DIV/0!	1	0.5	0.333333	3	748.857	#VALUE!	#VALUE!	#VALUE!	157.481	1	1.96375	120150	#VALUE!	#VALUE!	#VALUE!	0.981528	0.00623269	0.0122395
235	features360			6.96													2379					14072.4	23473.3		3	#DIV/0!	#DIV/0!	#DIV/0!	1	0.5	0	2	14072.4	#VALUE!	#VALUE!	#VALUE!	1	1.66803	#VALUE!	37545.7	#VALUE!	#VALUE!	#VALUE!	0.374808	0.625192	#VALUE!
236	features362			6.973												1518330	15232.5					512181	1.69542e+06		4	#DIV/0!	#DIV/0!	#DIV/0!	1	0.5	0	2	512181	#VALUE!	#VALUE!	#VALUE!	1	3.3102	#VALUE!	2.2076e+06	#VALUE!	#VALUE!	#VALUE!	0.232008	0.767992	#VALUE!
237	features363			6.984												344434	7916.5				2628	90995.1	463601	5719.71	6	#DIV/0!	#DIV/0!	1	0.5	0.333333	0.25	4	2628	#VALUE!	#VALUE!	1	34.6252	176.408	2.17645	562944	#VALUE!	#VALUE!	0.00466831	0.161641	0.82353	0.0101604
238	features364			6.988												259232	59532					224830	559396		4	#DIV/0!	#DIV/0!	#DIV/0!	1	0.5	0	2	224830	#VALUE!	#VALUE!	#VALUE!	1	2.48809	#VALUE!	784226	#VALUE!	#VALUE!	#VALUE!	0.28669	0.71331	#VALUE!
239	features365			6.992												2.02441e+06							778955	24648.9	3	#DIV/0!	#DIV/0!	#DIV/0!	#DIV/0!	1	0.5	2	24648.9	#VALUE!	#VALUE!	#VALUE!	#VALUE!	31.6021	1	803603	#VALUE!	#VALUE!	#VALUE!	#VALUE!	0.969327	0.0306729
240	features366			6.997												5.85472e+06						1.27698e+06			2	#DIV/0!	#DIV/0!	#DIV/0!	1	0	0	1	1.27698e+06	#VALUE!	#VALUE!	#VALUE!	1	0	#VALUE!	1.27698e+06	#VALUE!	#VALUE!	#VALUE!	1	0	#VALUE!
241	features367			6.998												454209	2658.5		3936	1089.43		30542.6	541381	1364.29	7	1	0.5	0	0.333333	0.25	0.2	5	1089.43	3.6129	1	#VALUE!	28.0354	496.94	1.25229	578313	0.006806	0.0018838	#VALUE!	0.0528132	0.936138	0.00235908
242	features368			7.004												168511	9974					812366	2.75392e+06	10025.7	5	#DIV/0!	#DIV/0!	#DIV/0!	1	0.5	0.333333	3	10025.7	#VALUE!	#VALUE!	0	81.0282	274.685	1	3.57631e+06	#VALUE!	#VALUE!	0	0.227152	0.770045	0.00280337
243	features369			7.006												823343						220155			2	#DIV/0!	#DIV/0!	#DIV/0!	1	0	0	1	220155	#VALUE!	#VALUE!	#VALUE!	1	#VALUE!	#VALUE!	220155	#VALUE!	#VALUE!	#VALUE!	1	#VALUE!	#VALUE!
244	features370			7.016												1.44933e+07	65023.5		17176.3	3240.57	73694.3	4.07458e+06	6795.71		7	1	0.5	0.333333	0.25	0.2	0	5	3240.57	5.30039	1	22.7411	1257.36	2.09707	#VALUE!	4.17549e+06	0.0041136	0.000776094	0.0176493	0.975834	0.00162753	#VALUE!
245	features372			7.025												9.21774e+07	426559		91967.4	37461.1	512339	2.52515e+07	70039.4		7	1	0.5	0.333333	0.25	0.2	0	5	37461.1	2.45501	1	13.6765	674.072	1.86966	#VALUE!	2.59633e+07	0.00354221	0.00144285	0.0197332	0.972584	0.00269763	#VALUE!
246	features374			7.041												16222.9	8895			3004	827.714	3728	22227.4		6	#DIV/0!	1	0.5	0.333333	0.25	0	4	827.714	#VALUE!	3.62927	1	4.50397	26.854	#VALUE!	29787.1	#VALUE!	0.100849	0.0277876	0.125155	0.746209	#VALUE!
247	features375			7.042												129940	519.5					27786.9			3	#DIV/0!	#DIV/0!	#DIV/0!	1	0	0	1	27786.9	#VALUE!	#VALUE!	#VALUE!	1	#VALUE!	#VALUE!	27786.9	#VALUE!	#VALUE!	#VALUE!	1	#VALUE!	#VALUE!
248	features376			7.048												4.89236e+06			90699.7			1.66993e+06			3	1	0	0	0.5	0	0	2	90699.7	1	#VALUE!	#VALUE!	18.4116	#VALUE!	#VALUE!	1.76063e+06	0.0515156	#VALUE!	#VALUE!	0.948484	#VALUE!	#VALUE!
249	features377			7.066												375221	3792					931708	147941	997.429	5	#DIV/0!	#DIV/0!	#DIV/0!	1	0.5	0.333333	3	997.429	#VALUE!	#VALUE!	#VALUE!	934.11	148.323	1	1.08065e+06	#VALUE!	#VALUE!	#VALUE!	0.862176	0.136901	0.000922992
250	features378			7.066												2.88023e+06						1169224	20559.1		3	#DIV/0!	#DIV/0!	#DIV/0!	1	0.5	0	2	20559.1	#VALUE!	#VALUE!	#VALUE!	56.8712	1	#VALUE!	1.18978e+06	#VALUE!	#VALUE!	#VALUE!	0.98272	0.0172797	#VALUE!
251	features380			7.07												420293			17248		3555.14	128482	3142		5	1	0	0.5	0.333333	0.25	0	4	3142	5.4895	#VALUE!	1.13149	40.8919	1	#VALUE!	152427	0.113155	#VALUE!	0.0233235	0.842908	0.0206131	#VALUE!
252	features381			7.079												108056				332.286	2264.86	49206			4	#DIV/0!	1	0.5	0.333333	0	0	3	332.286	#VALUE!	1	6.81599	148.083	#VALUE!	#VALUE!	51803.1	#VALUE!	0.00641439	0.0437205	0.949865	#VALUE!	#VALUE!
253	features383			7.091																		701458	896705		2	#DIV/0!	#DIV/0!	#DIV/0!	1	0.5	0	2	701458	#VALUE!	0	0	1	1.27835	0	1.59816e+06	#VALUE!	0	0	0.438915	0.561085	0
254	features384			7.094												1087582	2456881					443907	746388		4	#DIV/0!	#DIV/0!	#DIV/0!	1	0.5	0	2	443907	#VALUE!	#VALUE!	#VALUE!	1	1.68141	#VALUE!	1.19029e+06	#VALUE!	#VALUE!	#VALUE!	0.372938	0.627062	#VALUE!
255	features385			7.119												91461.7									1	#DIV/0!	#DIV/0!	#DIV/0!	#DIV/0!	#DIV/0!	#DIV/0!	0	0	#DIV/0!	#VALUE!	#DIV/0!	#VALUE!	#VALUE!	#VALUE!	0	#DIV/0!	#VALUE!	#DIV/0!	#VALUE!	#VALUE!	#VALUE!
256	features386			7.127												53679.6	8978.5		2.02879e+07	2201.07		1.73366e+06		11835.9	6	1	0.5	0	0.333333	0	0.25	4	2201.07	9217.3	1	0	787.645	#VALUE!	5.37735	2.20356e+07	0.920688	9.98869e-05	0	0.0786754	#VALUE!	0.000537127
257	features388			7.136												194124			2140			56666.9	756.286		4	1	0	0	0.5	0.333333	0	3	756.286	2.82962	#VALUE!	#VALUE!	74.9278	1	#VALUE!	59563.1	0.0359283	#VALUE!	#VALUE!	0.951375	0.0126972	#VALUE!
258	features390			7.139												19718.6	45599		3337.43		618.571		542931	5647.43	6	1	0	0.5	0	0.333333	0.25	4	618.571	5.39538	#VALUE!	1	#VALUE!	877.718	9.12979	552535	0.00604022	#VALUE!	0.00111952	#VALUE!	0.982619	0.010221
259	features393			7.16												1.71211e+06	135070				73171.4	608760	1176368	8198.86	6	#DIV/0!	#DIV/0!	1	0.5	0.333333	0.25	4	8198.86	#VALUE!	#VALUE!	8.92459	74.2493	143.48	1	1.8665e+06	#VALUE!	#VALUE!	0.0392025	0.326151	0.630254	0.00439264
260	features394			7.202												194119				403.714	14893.7		958.571		4	#DIV/0!	1	0.5	0	0.333333	0	3	403.714	#VALUE!	1	36.8917	#VALUE!	2.37438	#VALUE!	16256	#VALUE!	0.0248348	0.916198	#VALUE!	0.0589672	#VALUE!
261	features395			7.215												57440					4953.14	29134.3	8357.71		4	#DIV/0!	#DIV/0!	1	0.5	0.333333	0	3	4953.14	#VALUE!	#VALUE!	1	5.88198	1.68736	#VALUE!	42445.1	#VALUE!	#VALUE!	0.116695	0.686399	0.196906	#VALUE!
262	features396			7.233												1.342e+06									1	#DIV/0!	#DIV/0!	#DIV/0!	#DIV/0!	#DIV/0!	#DIV/0!	0	0	#VALUE!	#VALUE!	#VALUE!	#VALUE!	#VALUE!	#DIV/0!	0	#VALUE!	#VALUE!	#VALUE!	#VALUE!	#VALUE!	#DIV/0!
263	features397			7.255												74651.4				789.714	864.286	10653.4	109919	1459.43	6	#DIV/0!	1	0.5	0.333333	0.25	0.2	5	789.714	#VALUE!	1	1.09443	13.4902	139.188	1.84805	123685	#VALUE!	0.00638486	0.00698777	0.0861333	0.888695	0.0117995
264	features398			7.258												305401	2340.5		34735.1		1335.71	11139.1	611.143		6	1	0	0.5	0.333333	0.25	0	4	611.143	56.8364	#VALUE!	2.1856	18.2267	1	#VALUE!	47821.1	0.726355	#VALUE!	0.0279315	0.232933	0.0127798	#VALUE!
265	features399			7.262													834.5						215879	1810.57	3	#DIV/0!	#DIV/0!	#DIV/0!	#DIV/0!	1	0.5	2	1810.57	#VALUE!	#VALUE!	#VALUE!	#VALUE!	119.233	1	217690	#VALUE!	#VALUE!	#VALUE!	#VALUE!	0.991683	0.00831721
266	features400			7.264													17085						757367		2	#DIV/0!	#DIV/0!	#DIV/0!	#DIV/0!	1	0	1	757367	#VALUE!	#VALUE!	0	#VALUE!	1	0	757367	#VALUE!	#VALUE!	0	#VALUE!	1	0
267	features401			7.267												343003						129876	36738	2369.14	4	#DIV/0!	#DIV/0!	#DIV/0!	1	0.5	0.333333	3	2369.14	#VALUE!	#VALUE!	#VALUE!	54.8199	15.5069	1	168983	#VALUE!	#VALUE!	#VALUE!	0.768574	0.217406	0.01402
268	features402			7.273													5332						198260	8414.14	3	#DIV/0!	#DIV/0!	#DIV/0!	#DIV/0!	1	0.5	2	8414.14	#VALUE!	0	#VALUE!	#VALUE!	23.5627	1	206674	#VALUE!	0	#VALUE!	#VALUE!	0.959288	0.0407121
269	features404			7.286												694154			18304			1258968	699272		4	1	0	0	0.5	0.333333	0	3	18304	1	#VALUE!	#VALUE!	68.781	38.2032	#VALUE!	1976544	0.00926061	#VALUE!	#VALUE!	0.636954	0.353785	#VALUE!
270	features405			7.29												1.02222e+06						223546	6834.86		3	#DIV/0!	#DIV/0!	#DIV/0!	1	0.5	0	2	6834.86	#VALUE!	#VALUE!	#VALUE!	32.7067	1	#VALUE!	230381	#VALUE!	#VALUE!	#VALUE!	0.970332	0.0296677	#VALUE!
271	features407			7.311												29337.1			11802.6			10170.6	77342		4	1	0	0	0.5	0.333333	0	3	10170.6	1.16046	#VALUE!	#VALUE!	1	7.60449	#VALUE!	99315.1	0.11884	#VALUE!	#VALUE!	0.102407	0.778753	#VALUE!
272	features408			7.312												305401	2340.5		10412.9		1335.71	7648	611.143		6	1	0	0.5	0.333333	0.25	0	4	611.143	17.0383	#VALUE!	2.1856	12.5143	1	#VALUE!	20007.7	0.520442	#VALUE!	0.06676	0.382253	0.0305454	#VALUE!
273	features409			7.317											267							470873	855240		2	#DIV/0!	#DIV/0!	#DIV/0!	1	0.5	0	2	470873	#VALUE!	#VALUE!	#VALUE!	1	1.81628	#VALUE!	1.32611e+06	#VALUE!	#VALUE!	#VALUE!	0.355078	0.644922	#VALUE!
274	features410			7.318												6642.57			102154						2	1	0	0	0	0	0	1	102154	1	0	0	#VALUE!	0	0	102154	1	0	0	#VALUE!	0	0
275	features411			7.323												579416						182957	945.143		3	#DIV/0!	#DIV/0!	#DIV/0!	1	0.5	0	2	945.143	#VALUE!	#VALUE!	#VALUE!	193.576	1	#VALUE!	183902	#VALUE!	#VALUE!	#VALUE!	0.994861	0.00513938	#VALUE!
276	features413			7.336															239124						1	1	0	0	0	0	0	1	239124	1	#VALUE!	0	0	0	#VALUE!	239124	1	#VALUE!	0	0	0	#VALUE!
277	features415			7.351												2.64179e+06	3439.5			880	1446		1.21715e+07	3900.86	6	#DIV/0!	1	0.5	0	0.333333	0.25	4	880	#VALUE!	1	1.64318	#VALUE!	13831.2	4.43279	1.21777e+07	#VALUE!	7.22632e-05	0.000118742	#VALUE!	0.999489	0.000320328
278	features416			7.353															185986						1	1	0	0	0	0	0	1	185986	1	0	0	0	0	0	185986	1	0	0	0	0	0
279	features418			7.355												324730	1413.5					139040			3	#DIV/0!	#DIV/0!	#DIV/0!	1	0	0	1	139040	#VALUE!	#VALUE!	#VALUE!	1	#VALUE!	#VALUE!	139040	#VALUE!	#VALUE!	#VALUE!	1	#VALUE!	#VALUE!
280	features419			7.36															91731			12662.7	11411.9		3	1	0	0	0.5	0.333333	0	3	11411.9	8.03822	#VALUE!	0	1.10961	1	#VALUE!	115806	0.792112	#VALUE!	0	0.109345	0.0985432	#VALUE!
281	features421			7.362												646480	10038.5		7118.29	3315.43					4	1	0.5	0	0	0	0	2	3315.43	2.14702	1	#VALUE!	#VALUE!	#VALUE!	#VALUE!	10433.7	0.682239	0.317761	#VALUE!	#VALUE!	#VALUE!	#VALUE!
282	features422			7.371												100059			8214.86	782		31955.7		1155.71	5	1	0.5	0	0.333333	0	0.25	4	782	10.5049	1	#VALUE!	40.8641	#VALUE!	1.4779	42108.3	0.195089	0.0185712	#VALUE!	0.758894	#VALUE!	0.0274462
283	features423			7.377												518880						132288	206518		3	#DIV/0!	#DIV/0!	#DIV/0!	1	0.5	0	2	132288	#VALUE!	#VALUE!	#VALUE!	1	1.56112	#VALUE!	338806	#VALUE!	#VALUE!	#VALUE!	0.390454	0.609546	#VALUE!
284	features424			7.38												875061			3076.43	7021.86	95072.7	642.429	670.714		6	1	0.5	0.333333	0.25	0.2	0	5	642.429	4.78875	10.9302	147.99	1	1.04403	#VALUE!	106484	0.028891	0.0659427	0.892834	0.00603309	0.00629872	#VALUE!
285	features425			7.385												1.67621e+06					212808	1170.86			3	#DIV/0!	#DIV/0!	1	0.5	0	0	2	1170.86	#VALUE!	#VALUE!	181.754	1	0	#VALUE!	213979	#VALUE!	#VALUE!	0.994528	0.00547183	0	#VALUE!
286	features426			7.386												279535						68643.7			2	#DIV/0!	#DIV/0!	#DIV/0!	1	0	0	1	68643.7	0	#VALUE!	0	1	0	#VALUE!	68643.7	0	#VALUE!	0	1	0	#VALUE!
287	features427			7.386												3.22163e+06			2.79335e+07						2	1	0	0	0	0	0	1	2.79335e+07	1	0	0	#VALUE!	0	0	2.79335e+07	1	0	0	#VALUE!	0	0
288	features428			7.395												131446			2.62628e+06			255760	328070		4	1	0	0	0.5	0.333333	0	3	255760	10.2685	0	0	1	1.28273	0	3.21011e+06	0.818127	0	0	0.0796734	0.102199	0
289	features429			7.396												112579			1.38804e+06				129483		3	1	0	0	0	0.5	0	2	129483	10.7198	0	0	0	1	0	1517519	0.914675	0	0	0	0.0853254	0
290	features430			7.397												255328			1.35293e+06						2	1	0	0	0	0	0	1	1.35293e+06	1	0	0	0	0	0	1.35293e+06	1	0	0	0	0	0
291	features431			7.399															3.29988e+06						1	1	0	0	0	0	0	1	3.29988e+06	1	0	0	0	0	0	3.29988e+06	1	0	0	0	0	0
292	features432			7.399												255328			1.35293e+06						2	1	0	0	0	0	0	1	1.35293e+06	1	0	0	0	0	0	1.35293e+06	1	0	0	0	0	0
293	features433			7.4												282776			2.1314e+06				146597		3	1	0	0	0	0.5	0	2	146597	14.5392	0	0	0	1	0	2.278e+06	0.935647	0	0	0	0.0643535	0
294	features434			7.4												152428			998671			80067.3	68018.4		4	1	0	0	0.5	0.333333	0	3	68018.4	14.6824	0	0	1.17714	1	0	1.14676e+06	0.870866	0	0	0.0698206	0.0593137	0
295	features435			7.404												66009.8			169444						2	1	0	0	0	0	0	1	169444	1	0	0	0	0	0	169444	1	0	0	0	0	0
296	features436			7.413													3500.5					94807.1	16640		3	#DIV/0!	#DIV/0!	#DIV/0!	1	0.5	0	2	16640	#VALUE!	#VALUE!	#VALUE!	5.69754	1	#VALUE!	111447	#VALUE!	#VALUE!	#VALUE!	0.850692	0.149308	#VALUE!
297	features438			7.448													3826.5				3209.71	788627			3	#DIV/0!	#DIV/0!	1	0.5	0	0	2	3209.71	#VALUE!	#VALUE!	1	245.7	#VALUE!	#VALUE!	791837	#VALUE!	#VALUE!	0.0040535	0.995946	#VALUE!	#VALUE!
298	features441			7.468												233399			52622.6			73680	4467.43		4	1	0	0	0.5	0.333333	0	3	4467.43	11.7792	#VALUE!	#VALUE!	16.4927	1	#VALUE!	130770	0.402406	#VALUE!	#VALUE!	0.563432	0.0341625	#VALUE!
300	features443			7.488															1853.43	12628.9	10308	309334	1376.29		5	1	0.5	0.333333	0.25	0.2	0	5	1376.29	1.34669	9.17604	7.48972	224.76	1	#VALUE!	335501	0.00552436	0.0376418	0.0307242	0.922007	0.00410218	#VALUE!
301	features446			7.513												7.65828e+06			1.21484e+06						2	1	0	0	0	0	0	1	1.21484e+06	1	#VALUE!	#VALUE!	#VALUE!	#VALUE!	#VALUE!	1.21484e+06	1	#VALUE!	#VALUE!	#VALUE!	#VALUE!	#VALUE!
302	features447			7.538												4.408e+06	110988					397791	1.41215e+06		4	#DIV/0!	#DIV/0!	#DIV/0!	1	0.5	0	2	397791	#VALUE!	#VALUE!	#VALUE!	1	3.54999	#VALUE!	1.80994e+06	#VALUE!	#VALUE!	#VALUE!	0.219781	0.780219	#VALUE!
303	features448			7.541												1.7532e+06						98399.3			2	#DIV/0!	#DIV/0!	#DIV/0!	1	0	0	1	98399.3	0	#VALUE!	0	1	#VALUE!	#VALUE!	98399.3	0	#VALUE!	0	1	#VALUE!	#VALUE!
304	features449			7.552												103627					6860	604			3	#DIV/0!	#DIV/0!	1	0.5	0	0	2	604	0	0	11.3576	1	0	#VALUE!	7464	0	0	0.919078	0.0809218	0	#VALUE!
305	features450			7.559												473634				2250.29	55301.1	14684.6			4	#DIV/0!	1	0.5	0.333333	0	0	3	2250.29	#VALUE!	1	24.5752	6.52565	#VALUE!	#VALUE!	72236	#VALUE!	0.0311519	0.765562	0.203286	#VALUE!	#VALUE!
306	features451			7.561												430894	1607		1223.71	5858.29	43070	4873.71	1098.57	697.429	8	1	0.5	0.333333	0.25	0.2	0.166667	6	697.429	1.75461	8.39984	61.7554	6.98812	1.57517	1	56821.7	0.021536	0.103099	0.757985	0.085772	0.0193337	0.012274
307	features452			7.574												430894	1607		1223.71	5858.29	43070	4873.71	1098.57	697.429	8	1	0.5	0.333333	0.25	0.2	0.166667	6	697.429	1.75461	8.39984	61.7554	6.98812	1.57517	1	56821.7	0.021536	0.103099	0.757985	0.085772	0.0193337	0.012274
308	features453			7.583												595631			723929			227781			3	1	0	0	0.5	0	0	2	227781	3.17819	#VALUE!	#VALUE!	1	#VALUE!	#VALUE!	951710	0.760662	#VALUE!	#VALUE!	0.239338	#VALUE!	#VALUE!
309	features454			7.589												86902.9	4794.5		1248		474	248811	59844.9	1080	7	1	0	0.5	0.333333	0.25	0.2	5	474	2.63291	#VALUE!	1	524.918	126.255	2.27848	311458	0.00400696	#VALUE!	0.00152187	0.798859	0.192144	0.00346756
311	features456			7.597												1.0448e+06			43061.4	794.857	1090	412889	2329.71		6	1	0.5	0.333333	0.25	0.2	0	5	794.857	54.1751	1	1.37132	519.45	2.93098	#VALUE!	460165	0.0935783	0.00172733	0.00236872	0.897263	0.00506278	#VALUE!
312	features457			7.6												660586						197939	229787		3	#DIV/0!	#DIV/0!	#DIV/0!	1	0.5	0	2	197939	#VALUE!	#VALUE!	#VALUE!	1	1.1609	0	427726	#VALUE!	#VALUE!	#VALUE!	0.46277	0.53723	0
313	features458			7.607												319958				4367	38178.4	1012.14			4	#DIV/0!	1	0.5	0.333333	0	0	3	1012.14	0	4.31461	37.7204	1	0	#VALUE!	43557.6	0	0.100258	0.876505	0.0232369	0	#VALUE!
314	features459			7.613												150857					19222	1808.86	607.714		4	#DIV/0!	#DIV/0!	1	0.5	0.333333	0	3	607.714	#VALUE!	#VALUE!	31.63	2.97649	1	#VALUE!	21638.6	#VALUE!	#VALUE!	0.888321	0.0835941	0.0280848	#VALUE!
315	features460			7.617													7275.5					377162			2	#DIV/0!	#DIV/0!	#DIV/0!	1	0	0	1	377162	#VALUE!	#VALUE!	#VALUE!	1	#VALUE!	#VALUE!	377162	#VALUE!	#VALUE!	#VALUE!	1	#VALUE!	#VALUE!
316	features462			7.619												319520				3929.5	37740.9				3	#DIV/0!	1	0.5	0	0	0	2	3929.5	0	1	9.60451	0	0	#VALUE!	41670.4	0	0.0942995	0.905701	0	0	#VALUE!
317	features463			7.628												916243	5033				582.286	146350	142774		5	#DIV/0!	#DIV/0!	1	0.5	0.333333	0	3	582.286	#VALUE!	#VALUE!	1	251.337	245.195	#VALUE!	289706	#VALUE!	#VALUE!	0.00200992	0.505167	0.492823	#VALUE!
318	features464			7.636																			225727		1	#DIV/0!	#DIV/0!	#DIV/0!	#DIV/0!	1	0	1	225727	#VALUE!	#VALUE!	0	#VALUE!	1	0	225727	#VALUE!	#VALUE!	0	#VALUE!	1	0
319	features465			7.643												916243					582.286	146350	142774		4	#DIV/0!	#DIV/0!	1	0.5	0.333333	0	3	582.286	#VALUE!	#VALUE!	1	251.337	245.195	#VALUE!	289706	#VALUE!	#VALUE!	0.00200992	0.505167	0.492823	#VALUE!
320	features466			7.687												258114			11278.3		6762	96565.1	1989.71		5	1	0	0.5	0.333333	0.25	0	4	1989.71	5.66829	#VALUE!	3.39848	48.5322	1	#VALUE!	116595	0.0967303	#VALUE!	0.0579956	0.828209	0.0170652	#VALUE!
321	features467			7.689															260269			88589.6	140830		3	1	0	0	0.5	0.333333	0	3	88589.6	2.93792	0	0	1	1.58969	#VALUE!	489689	0.531499	0	0	0.18091	0.287591	#VALUE!
322	features468			7.698												2.83921e+06	4856			1079.14	157.429	835057	12067.4	1311.43	7	#DIV/0!	1	0.5	0.333333	0.25	0.2	5	157.429	#VALUE!	6.85481	1	5304.36	76.6534	8.33031	849673	#VALUE!	0.00127007	0.000185281	0.982799	0.0142024	0.00154345
323	features469			7.705												1.22369e+07	31706					3.58414e+06	59025.4	1452	5	#DIV/0!	#DIV/0!	#DIV/0!	1	0.5	0.333333	3	1452	#VALUE!	#VALUE!	#VALUE!	2468.42	40.6511	1	3.64462e+06	#VALUE!	#VALUE!	#VALUE!	0.983406	0.0161952	0.000398395
324	features470			7.707												29201.4						14288	19614.3		3	#DIV/0!	#DIV/0!	#DIV/0!	1	0.5	0	2	14288	#VALUE!	#VALUE!	#VALUE!	1	1.37278	#VALUE!	33902.3	#VALUE!	#VALUE!	#VALUE!	0.421447	0.578553	#VALUE!
325	features471			7.71												1.1717e+06	30503.5					120033	304024		4	#DIV/0!	#DIV/0!	#DIV/0!	1	0.5	0	2	120033	#VALUE!	#VALUE!	#VALUE!	1	2.53285	#VALUE!	424057	#VALUE!	#VALUE!	#VALUE!	0.283058	0.716942	#VALUE!
326	features472			7.721												4694.29			38428.9	1491.14	1143.71			1904.86	5	1	0.5	0.333333	0	0	0.25	4	1143.71	33.6	1.30377	1	#VALUE!	#VALUE!	1.6655	42968.6	0.894348	0.0347031	0.0266175	#VALUE!	#VALUE!	0.0443314
327	features473			7.725															617031						1	1	0	0	0	0	0	1	617031	1	#VALUE!	#VALUE!	#VALUE!	#VALUE!	#VALUE!	617031	1	#VALUE!	#VALUE!	#VALUE!	#VALUE!	#VALUE!
328	features474			7.727												243294	28662					146292	111834		4	#DIV/0!	#DIV/0!	#DIV/0!	1	0.5	0	2	111834	0	#VALUE!	0	1.30812	1	#VALUE!	258126	0	#VALUE!	0	0.566747	0.433253	#VALUE!
329	features475			7.728											429				179468	360.857		2521.71	3841.71	581.429	5	1	0.5	0	0.333333	0.25	0.2	5	360.857	497.339	1	#VALUE!	6.98812	10.6461	1.61124	186774	0.960885	0.00193205	#VALUE!	0.0135014	0.0205688	0.00311301
330	features476			7.732												39331.4	48858					134596	82075.4		4	#DIV/0!	#DIV/0!	#DIV/0!	1	0.5	0	2	82075.4	#VALUE!	#VALUE!	#VALUE!	1.6399	1	#VALUE!	216671	#VALUE!	#VALUE!	#VALUE!	0.621198	0.378802	#VALUE!
331	features477			7.734													1051.5		142079		545.429		1279.14	616.857	5	1	0	0.5	0	0.333333	0.25	4	545.429	260.491	#VALUE!	1	#VALUE!	2.34521	1.13096	144521	0.983107	#VALUE!	0.00377405	#VALUE!	0.00885092	0.00426829
332	features479			7.761												209924	114739					203713	57668.9		4	#DIV/0!	#DIV/0!	#DIV/0!	1	0.5	0	2	57668.9	#VALUE!	#VALUE!	#VALUE!	3.53247	1	#VALUE!	261382	#VALUE!	#VALUE!	#VALUE!	0.77937	0.22063	#VALUE!
333	features481			7.809															104807			34889.4	41164.6		3	1	0	0	0.5	0.333333	0	3	34889.4	3.00397	0	0	1	1.17986	0	180861	0.579489	0	0	0.192908	0.227604	0
334	features482			7.814												4538			14029.1						2	1	0	0	0	0	0	1	14029.1	1	0	0	#VALUE!	#VALUE!	#VALUE!	14029.1	1	0	0	#VALUE!	#VALUE!	#VALUE!
335	features483			7.819												9.78157e+06	185990		129465			400924	4685762	580171	6	1	0	0	0.5	0.333333	0.25	4	129465	1	#VALUE!	#VALUE!	3.09678	36.1933	4.4813	5.79632e+06	0.0223357	#VALUE!	#VALUE!	0.0691687	0.808403	0.100093
336	features484			7.826												69942.9	17274		4344		1176	42655.4	113664		6	1	0	0.5	0.333333	0.25	0	4	1176	3.69388	#VALUE!	1	36.2716	96.6528	#VALUE!	161839	0.0268415	#VALUE!	0.00726647	0.263567	0.702325	#VALUE!
337	features485			7.828												234033						95857.4			2	#DIV/0!	#DIV/0!	#DIV/0!	1	0	0	1	95857.4	#VALUE!	#VALUE!	#VALUE!	1	#VALUE!	#VALUE!	95857.4	#VALUE!	#VALUE!	#VALUE!	1	#VALUE!	#VALUE!
338	features487			7.833												804564			65444.3			317278			3	1	0	0	0.5	0	0	2	65444.3	1	#VALUE!	#VALUE!	4.84806	#VALUE!	#VALUE!	382722	0.170997	#VALUE!	#VALUE!	0.829003	#VALUE!	#VALUE!
339	features488			7.839												151230			3313.43		2284.57	34259.4			4	1	0	0.5	0.333333	0	0	3	2284.57	1.45035	#VALUE!	1	14.996	#VALUE!	#VALUE!	39857.4	0.083132	#VALUE!	0.0573186	0.859549	#VALUE!	#VALUE!
340	features489			7.842															1176803			2.93738e+06	1.5692e+06		3	1	0	0	0.5	0.333333	0	3	1176803	1	#VALUE!	#VALUE!	2.49607	1.33344	#VALUE!	5.68338e+06	0.20706	#VALUE!	#VALUE!	0.516837	0.276103	#VALUE!
341	features490			7.851												419880						141062			2	#DIV/0!	#DIV/0!	#DIV/0!	1	0	0	1	141062	#VALUE!	#VALUE!	0	1	#VALUE!	#VALUE!	141062	#VALUE!	#VALUE!	0	1	#VALUE!	#VALUE!
342	features491			7.865															4.81488e+07					24342	2	1	0	0	0	0	0.5	2	24342	1978.01	#VALUE!	#VALUE!	#VALUE!	#VALUE!	1	4.81732e+07	0.999495	#VALUE!	#VALUE!	#VALUE!	#VALUE!	0.000505302
343	features492			7.867												418503						216906	9284		3	#DIV/0!	#DIV/0!	#DIV/0!	1	0.5	0	2	9284	#VALUE!	#VALUE!	#VALUE!	23.3634	1	#VALUE!	226190	#VALUE!	#VALUE!	#VALUE!	0.958955	0.0410451	#VALUE!
344	features493			7.879															126052			47086	20260.9		3	1	0	0	0.5	0.333333	0	3	20260.9	6.22144	0	0	2.32399	1	0	193399	0.651772	0	0	0.243466	0.104762	0
345	features494			7.901												489201	3489					137577			3	#DIV/0!	#DIV/0!	#DIV/0!	1	0	0	1	137577	#VALUE!	#VALUE!	#VALUE!	1	#VALUE!	#VALUE!	137577	#VALUE!	#VALUE!	#VALUE!	1	#VALUE!	#VALUE!
346	features495			7.904												266335	10091.5					92919.7	170163	3915.14	5	#DIV/0!	#DIV/0!	#DIV/0!	1	0.5	0.333333	3	3915.14	#VALUE!	#VALUE!	#VALUE!	23.7334	43.4627	1	266998	#VALUE!	#VALUE!	#VALUE!	0.348017	0.63732	0.0146636
347	features496			7.905												1.31255e+06	628054					2.46347e+06	2.57583e+06		4	#DIV/0!	#DIV/0!	#DIV/0!	1	0.5	0	2	2.46347e+06	#VALUE!	#VALUE!	0	1	1.04561	0	5.0393e+06	#VALUE!	#VALUE!	0	0.488852	0.511148	0
348	features497			7.915												60574.3	6395		9446.86		1410.29	76759.1		2512.86	6	1	0	0.5	0.333333	0	0.25	4	1410.29	6.69854	#VALUE!	1	54.4281	#VALUE!	1.78181	90129.1	0.104815	#VALUE!	0.0156474	0.851657	#VALUE!	0.0278806
349	features499			7.931													5404.5		292841			11778.1	7414.43		4	1	0	0	0.5	0.333333	0	3	7414.43	39.4961	#VALUE!	#VALUE!	1.58854	1	#VALUE!	312034	0.938492	#VALUE!	#VALUE!	0.0377464	0.0237616	#VALUE!
350	features500			7.936															70238.6				20260.9		2	1	0	0	0	0.5	0	2	20260.9	3.46671	0	0	0	1	0	90499.4	0.776122	0	0	0	0.223878	0
351	features502			7.956												251177	1907.5			1588.86		97628.6	4249.71	1627.14	6	#DIV/0!	1	0	0.5	0.333333	0.25	4	1588.86	#VALUE!	1	#VALUE!	61.4458	2.6747	1.0241	105094	#VALUE!	0.0151184	#VALUE!	0.928962	0.0404372	0.0154827
352	features503			7.959															1.27971e+07			144180			2	1	0	0	0.5	0	0	2	144180	88.7575	0	#VALUE!	1	#VALUE!	#VALUE!	1.29413e+07	0.988859	0	#VALUE!	0.0111411	#VALUE!	#VALUE!
353	features504			7.969											321	12940.8			635595				17182.5		3	1	0	0	0	0.5	0	2	17182.5	36.9908	0	#VALUE!	0	1	0	652777	0.973678	0	#VALUE!	0	0.0263221	0
354	features505			7.971															892028			1.02386e+06	776304		3	1	0	0	0.5	0.333333	0	3	776304	1.14907	0	0	1.31889	1	#VALUE!	2.69219e+06	0.331339	0	0	0.380307	0.288354	#VALUE!
355	features506			7.972												1.56527e+06						356075			2	#DIV/0!	#DIV/0!	#DIV/0!	1	0	0	1	356075	#VALUE!	#VALUE!	#VALUE!	1	#VALUE!	#VALUE!	356075	#VALUE!	#VALUE!	#VALUE!	1	#VALUE!	#VALUE!
356	features507			7.975															482988			467476	387310		3	1	0	0	0.5	0.333333	0	3	387310	1.24703	#VALUE!	0	1.20698	1	0	1.33777e+06	0.361039	#VALUE!	0	0.349443	0.289518	0
357	features508			7.975												131404			1677.71			15891.1			3	1	0	0	0.5	0	0	2	1677.71	1	#VALUE!	#VALUE!	9.4719	#VALUE!	#VALUE!	17568.9	0.0954936	#VALUE!	#VALUE!	0.904506	#VALUE!	#VALUE!
358	features509			7.982															68450.6				19457.4		2	1	0	0	0	0.5	0	2	19457.4	3.51797	#VALUE!	0	#VALUE!	1	#VALUE!	87908	0.778661	#VALUE!	0	#VALUE!	0.221339	#VALUE!
359	features510			7.983																		1.28771e+06	970697		2	#DIV/0!	#DIV/0!	#DIV/0!	1	0.5	0	2	970697	#VALUE!	0	0	1.32658	1	#VALUE!	2.25841e+06	#VALUE!	0	0	0.570185	0.429815	#VALUE!
360	features511			7.983															242696						1	1	0	0	0	0	0	1	242696	1	#VALUE!	#VALUE!	#VALUE!	#VALUE!	#VALUE!	242696	1	#VALUE!	#VALUE!	#VALUE!	#VALUE!	#VALUE!
361	features513			7.988												1.22208e+06	3029					110119	1957.14	503.143	5	#DIV/0!	#DIV/0!	#DIV/0!	1	0.5	0.333333	3	503.143	#VALUE!	#VALUE!	#VALUE!	218.863	3.88984	1	112580	#VALUE!	#VALUE!	#VALUE!	0.978146	0.0173845	0.00446921
362	features514			7.998												275943	15357		5925.43	1141.14		81066.6	309775		6	1	0.5	0	0.333333	0.25	0	4	1141.14	5.19254	1	#VALUE!	71.0398	271.46	#VALUE!	397908	0.0148915	0.00286786	#VALUE!	0.203732	0.778509	#VALUE!
363	features515			8.008												59644.3					4207.14	31670.3	10053.4		4	#DIV/0!	#DIV/0!	1	0.5	0.333333	0	3	4207.14	#VALUE!	#VALUE!	1	7.52774	2.38961	#VALUE!	45930.9	#VALUE!	#VALUE!	0.0915973	0.689521	0.218882	#VALUE!
364	features516			8.015												2.27041e+06				316314		210194	40052		4	#DIV/0!	1	0	0.5	0.333333	0	3	40052	#VALUE!	7.89758	#VALUE!	5.24803	1	#VALUE!	566560	#VALUE!	0.558306	#VALUE!	0.371001	0.0706933	#VALUE!
365	features517			8.027												1.53505e+06	1978.5			9532.29	5123.43	531108	3172.86		6	#DIV/0!	1	0.5	0.333333	0.25	0	4	3172.86	#VALUE!	3.00432	1.61477	167.391	1	#VALUE!	548936	#VALUE!	0.017365	0.00933338	0.967522	0.00578001	#VALUE!
366	features520			8.046												2.90612e+06	3.67084e+06				1914.57	6576874	4.48799e+06		5	#DIV/0!	#DIV/0!	1	0.5	0.333333	0	3	1914.57	#VALUE!	#VALUE!	1	3435.17	2344.12	#VALUE!	1.10668e+07	#VALUE!	#VALUE!	0.000173002	0.59429	0.405537	#VALUE!
367	features521			8.062												199006	5989				34431.7	8319.14	1388.86		5	#DIV/0!	#DIV/0!	1	0.5	0.333333	0	3	1388.86	#VALUE!	#VALUE!	24.7914	5.98992	1	#VALUE!	44139.7	#VALUE!	#VALUE!	0.780062	0.188473	0.031465	#VALUE!
368	features522			8.067												166565	15056		83676.3		23922.6	33772.6	21463.1		6	1	0	0.5	0.333333	0.25	0	4	21463.1	3.8986	0	1.11459	1.57351	1	#VALUE!	162835	0.513873	0	0.146913	0.207404	0.131809	#VALUE!
369	features523			8.073												677846	361966				77938.9	1.06353e+06	518795		5	#DIV/0!	#DIV/0!	1	0.5	0.333333	0	3	77938.9	#VALUE!	#VALUE!	1	13.6456	6.65644	#VALUE!	1.66026e+06	#VALUE!	#VALUE!	0.0469438	0.640578	0.312478	#VALUE!
370	features525			8.08												675700			1.81489e+07			1751866	809118		4	1	0	0	0.5	0.333333	0	3	809118	22.4305	0	0	2.16516	1	#VALUE!	2.07099e+07	0.87634	0	0	0.0845907	0.0390691	#VALUE!
371	features526			8.087												740616				556.857	33737.7	71574.6	2443.43	491.143	6	#DIV/0!	1	0.5	0.333333	0.25	0.2	5	491.143	#VALUE!	1.1338	68.6923	145.731	4.97499	1	108804	#VALUE!	0.005118	0.310079	0.657832	0.0224572	0.00451403
372	features527			8.088											443	3.55132e+06	352776			370.286	605.714	1.25997e+06		1591.14	6	#DIV/0!	1	0.5	0.333333	0	0.25	4	370.286	#VALUE!	1	1.6358	3402.7	#VALUE!	4.29707	1.26254e+06	#VALUE!	0.000293287	0.000479759	0.997967	#VALUE!	0.00126027
373	features528			8.092											471	3.31175e+06					412654	335569			3	#DIV/0!	#DIV/0!	1	0.5	0	0	2	335569	0	0	1.22972	1	0	#VALUE!	748222	0	0	0.551512	0.448488	0	#VALUE!
374	features529			8.108												20610271				2698.43					2	#DIV/0!	1	0	0	0	0	1	2698.43	#VALUE!	1	#VALUE!	#VALUE!	#VALUE!	#VALUE!	2698.43	#VALUE!	1	#VALUE!	#VALUE!	#VALUE!	#VALUE!
375	features531			8.111												352266						40481.9	77522.4		3	#DIV/0!	#DIV/0!	#DIV/0!	1	0.5	0	2	40481.9	#VALUE!	0	#VALUE!	1	1.91499	#VALUE!	118004	#VALUE!	0	#VALUE!	0.343054	0.656946	#VALUE!
376	features532			8.118															1.07681e+06			1.26063e+06	1.41509e+06		3	1	0	0	0.5	0.333333	0	3	1.07681e+06	1	0	0	1.1707	1.31414	0	3.75253e+06	0.286957	0	0	0.335941	0.377102	0
377	features533			8.119												1.00562e+06	1878					184972			3	#DIV/0!	#DIV/0!	#DIV/0!	1	0	0	1	184972	#VALUE!	0	0	1	#VALUE!	#VALUE!	184972	#VALUE!	0	0	1	#VALUE!	#VALUE!
378	features534			8.12															1.47401e+06			1872474	1736502		3	1	0	0	0.5	0.333333	0	3	1.47401e+06	1	#VALUE!	#VALUE!	1.27033	1.17808	#VALUE!	5.08298e+06	0.289989	#VALUE!	#VALUE!	0.368381	0.341631	#VALUE!
379	features535			8.128												1.0672e+06					103717	11536.9			3	#DIV/0!	#DIV/0!	1	0.5	0	0	2	11536.9	0	#VALUE!	8.99004	1	#VALUE!	#VALUE!	115254	0	#VALUE!	0.8999	0.1001	#VALUE!	#VALUE!
380	features536			8.129															4294.57			18888			2	1	0	0	0.5	0	0	2	4294.57	1	#VALUE!	0	4.39811	0	#VALUE!	23182.6	0.18525	#VALUE!	0	0.81475	0	#VALUE!
381	features537			8.144													13291					6500.36	13298.9		3	#DIV/0!	#DIV/0!	#DIV/0!	1	0.5	0	2	6500.36	#VALUE!	#VALUE!	#VALUE!	1	2.04588	#VALUE!	19799.3	#VALUE!	#VALUE!	#VALUE!	0.328313	0.671687	#VALUE!
382	features539			8.164												185477						74495.7	14402		3	#DIV/0!	#DIV/0!	#DIV/0!	1	0.5	0	2	14402	#VALUE!	#VALUE!	#VALUE!	5.1726	1	#VALUE!	88897.7	#VALUE!	#VALUE!	#VALUE!	0.837994	0.162006	#VALUE!
383	features540			8.168													36335		16895.4			156946			3	1	0	0	0.5	0	0	2	16895.4	1	#VALUE!	#VALUE!	9.28926	#VALUE!	#VALUE!	173841	0.0971887	#VALUE!	#VALUE!	0.902811	#VALUE!	#VALUE!
384	features541			8.173												1.31031e+06			54836			321494	10054.3		4	1	0	0	0.5	0.333333	0	3	10054.3	5.45399	#VALUE!	#VALUE!	31.9758	1	#VALUE!	386384	0.141921	#VALUE!	#VALUE!	0.832058	0.0260215	#VALUE!
385	features542			8.177												1.1139e+07	13009.5		5228.57			4.34502e+06	28298.9		5	1	0	0	0.5	0.333333	0	3	5228.57	1	#VALUE!	#VALUE!	831.015	5.41235	#VALUE!	4.37855e+06	0.00119413	#VALUE!	#VALUE!	0.992343	0.00646307	#VALUE!
386	features543			8.178												2.30645e+06						1129636	9009.14		3	#DIV/0!	#DIV/0!	#DIV/0!	1	0.5	0	2	9009.14	#VALUE!	#VALUE!	#VALUE!	125.388	1	#VALUE!	1.13865e+06	#VALUE!	#VALUE!	#VALUE!	0.992088	0.00791216	#VALUE!
387	features544			8.181												652696	2832.5		3949.43	696.857	537.714	161770	850		7	1	0.5	0.333333	0.25	0.2	0	5	537.714	7.34485	1.29596	1	300.847	1.58077	#VALUE!	167804	0.023536	0.00415281	0.00320442	0.964041	0.00506544	#VALUE!
388	features545			8.19													6232.5		3668.86		1414	70406.9	87797.1		5	1	0	0.5	0.333333	0.25	0	4	1414	2.59467	#VALUE!	1	49.7927	62.0913	#VALUE!	163287	0.0224688	#VALUE!	0.00865961	0.431185	0.537687	#VALUE!
389	features547			8.195												390011	17445.5		43118.9			93839.1	13330.9		5	1	0	0	0.5	0.333333	0	3	13330.9	3.23451	#VALUE!	#VALUE!	7.03924	1	#VALUE!	150289	0.286907	#VALUE!	#VALUE!	0.624392	0.0887016	#VALUE!
390	features548			8.202											497	228060			17279902						2	1	0	0	0	0	0	1	17279902	1	#VALUE!	#VALUE!	#VALUE!	#VALUE!	#VALUE!	17279902	1	#VALUE!	#VALUE!	#VALUE!	#VALUE!	#VALUE!
391	features549			8.202												2.24331e+07					145582	3.58091e+06	2058116		4	#DIV/0!	#DIV/0!	1	0.5	0.333333	0	3	145582	#VALUE!	#VALUE!	1	24.5971	14.1371	#VALUE!	5784606	#VALUE!	#VALUE!	0.0251672	0.619041	0.355792	#VALUE!
392	features550			8.204															425686			3724.86			2	1	0	0	0.5	0	0	2	3724.86	114.283	#VALUE!	#VALUE!	1	#VALUE!	#VALUE!	429411	0.991326	#VALUE!	#VALUE!	0.00867434	#VALUE!	#VALUE!
393	features551			8.22												258560						21772			2	#DIV/0!	#DIV/0!	#DIV/0!	1	0	0	1	21772	#VALUE!	#VALUE!	#VALUE!	1	0	0	21772	#VALUE!	#VALUE!	#VALUE!	1	0	0
394	features552			8.221												160744	247630				605.714	213911		1591.14	5	#DIV/0!	#DIV/0!	1	0.5	0	0.333333	3	605.714	#VALUE!	#VALUE!	1	353.156	#VALUE!	2.62689	216108	#VALUE!	#VALUE!	0.00280283	0.989834	#VALUE!	0.00736271
395	features553			8.228												408750			3156.14			77668.7			3	1	0	0	0.5	0	0	2	3156.14	1	#VALUE!	0	24.6087	#VALUE!	0	80824.9	0.0390492	#VALUE!	0	0.960951	#VALUE!	0
396	features554			8.242												7.16106e+06			573060			2.18305e+06	30615.1		4	1	0	0	0.5	0.333333	0	3	30615.1	18.7182	#VALUE!	#VALUE!	71.3062	1	#VALUE!	2.78673e+06	0.205639	#VALUE!	#VALUE!	0.783375	0.0109861	#VALUE!
397	features557			8.253												36891	4294.5						20361.6		3	#DIV/0!	#DIV/0!	#DIV/0!	#DIV/0!	1	0	1	20361.6	#VALUE!	#VALUE!	#VALUE!	0	1	#VALUE!	20361.6	#VALUE!	#VALUE!	#VALUE!	0	1	#VALUE!
398	features558			8.255											665				1.38428e+06			2.33094e+06	2.03074e+06		3	1	0	0	0.5	0.333333	0	3	1.38428e+06	1	#VALUE!	#VALUE!	1.68387	1.46701	0	5.74596e+06	0.240913	#VALUE!	#VALUE!	0.405666	0.353421	0
399	features559			8.257												3.98835e+06					3881.14		28298.9	3130.86	4	#DIV/0!	#DIV/0!	1	0	0.5	0.333333	3	3130.86	#VALUE!	#VALUE!	1.23964	#VALUE!	9.03869	1	35310.9	#VALUE!	#VALUE!	0.109914	#VALUE!	0.801421	0.0886656
400	features560			8.267												2.58565e+07	37547.5		6986.86		33866.3	9.25872e+06	876.857		6	1	0	0.5	0.333333	0.25	0	4	876.857	7.96807	#VALUE!	38.6224	10559	1	#VALUE!	9.30045e+06	0.000751239	#VALUE!	0.00364136	0.995513	9.42811e-05	#VALUE!
401	features561			8.275												223597			86564.6			43291.7	8260.86		4	1	0	0	0.5	0.333333	0	3	8260.86	10.4789	#VALUE!	#VALUE!	5.24058	1	#VALUE!	138117	0.626747	#VALUE!	#VALUE!	0.313442	0.0598105	#VALUE!
402	features562			8.276												153981			25382.3			24742.9	4946.57		4	1	0	0	0.5	0.333333	0	3	4946.57	5.13129	#VALUE!	#VALUE!	5.00202	1	#VALUE!	55071.7	0.460895	#VALUE!	#VALUE!	0.449284	0.0898205	#VALUE!
403	features564			8.284												217330	17445.5		142539			82701.1	13330.9		5	1	0	0	0.5	0.333333	0	3	13330.9	10.6924	#VALUE!	#VALUE!	6.20374	1	#VALUE!	238571	0.597471	#VALUE!	#VALUE!	0.346651	0.0558778	#VALUE!
404	features565			8.285												438204			1406.57		598.857	100439	1627.14		5	1	0	0.5	0.333333	0.25	0	4	598.857	2.34876	#VALUE!	1	167.718	2.71708	#VALUE!	104071	0.0135154	#VALUE!	0.00575429	0.965095	0.0156349	#VALUE!
405	features566			8.287												196249			39737.7	1061.71		33871.7	5629.14		5	1	0.5	0	0.333333	0.25	0	4	1061.71	37.4279	1	#VALUE!	31.9029	5.30194	#VALUE!	80300.3	0.494864	0.0132218	#VALUE!	0.421813	0.0701012	#VALUE!
406	features568			8.296												2.01112e+06						75384.9			2	#DIV/0!	#DIV/0!	#DIV/0!	1	0	0	1	75384.9	#VALUE!	#VALUE!	#VALUE!	1	#VALUE!	#VALUE!	75384.9	#VALUE!	#VALUE!	#VALUE!	1	#VALUE!	#VALUE!
407	features569			8.299												8.34591e+06	31747.5		36742	3310.57		1.99465e+06	23768		6	1	0.5	0	0.333333	0.25	0	4	3310.57	11.0984	1	#VALUE!	602.509	7.17943	#VALUE!	2.05847e+06	0.0178492	0.00160827	#VALUE!	0.968996	0.0115464	#VALUE!
408	features570			8.3												1.20034e+06	470421				546.571	463014	134707		5	#DIV/0!	#DIV/0!	1	0.5	0.333333	0	3	546.571	#VALUE!	#VALUE!	1	847.124	246.458	#VALUE!	598267	#VALUE!	#VALUE!	0.00091359	0.773924	0.225162	#VALUE!
409	features571			8.3												1.65289e+06	4542.5					11491.2	638073	3318.36	5	#DIV/0!	#DIV/0!	#DIV/0!	1	0.5	0.333333	3	3318.36	#VALUE!	0	#VALUE!	3.46292	192.286	1	652882	#VALUE!	0	#VALUE!	0.0176007	0.977317	0.00508263
410	features572			8.302												1.04523e+06						206066			2	#DIV/0!	#DIV/0!	#DIV/0!	1	0	0	1	206066	0	0	#VALUE!	1	#VALUE!	#VALUE!	206066	0	0	#VALUE!	1	#VALUE!	#VALUE!
411	features573			8.309												1.47129e+07	6357		8293.14				5.61151e+06	17814	5	1	0	0	0	0.5	0.333333	3	8293.14	1	#VALUE!	#VALUE!	#VALUE!	676.644	2.14804	5.63761e+06	0.00147104	#VALUE!	#VALUE!	#VALUE!	0.995369	0.00315985
412	features574			8.31												376839	4596.5				586.286	102831	5741.43	1623.43	6	#DIV/0!	#DIV/0!	1	0.5	0.333333	0.25	4	586.286	#VALUE!	#VALUE!	1	175.394	9.79288	2.76901	110782	#VALUE!	#VALUE!	0.00529223	0.928227	0.0518262	0.0146542
413	features575			8.323												77390						20857.4			2	#DIV/0!	#DIV/0!	#DIV/0!	1	0	0	1	20857.4	#VALUE!	#VALUE!	0	1	0	0	20857.4	#VALUE!	#VALUE!	0	1	0	0
414	features576			8.327												632044			38674			861329			3	1	0	0	0.5	0	0	2	38674	1	#VALUE!	#VALUE!	22.2715	#VALUE!	#VALUE!	900003	0.042971	#VALUE!	#VALUE!	0.957029	#VALUE!	#VALUE!
415	features577			8.329												1.23236e+06						122374	353296		3	#DIV/0!	#DIV/0!	#DIV/0!	1	0.5	0	2	122374	#VALUE!	#VALUE!	#VALUE!	1	2.887	0	475670	#VALUE!	#VALUE!	#VALUE!	0.257267	0.742733	0
416	features578			8.337												352020			96808.6	7239.71		380116			4	1	0.5	0	0.333333	0	0	3	7239.71	13.3719	1	#VALUE!	52.5042	#VALUE!	#VALUE!	484164	0.19995	0.014953	#VALUE!	0.785097	#VALUE!	#VALUE!
417	features579			8.346												51172.9			5801.14		795.429	115839	68444.6	1782	6	1	0	0.5	0.333333	0.25	0.2	5	795.429	7.2931	#VALUE!	1	145.63	86.0474	2.2403	192662	0.0301105	#VALUE!	0.00412863	0.601254	0.355258	0.00924937
418	features580			8.355												67755.7			480564			20259.1	12250.9		4	1	0	0	0.5	0.333333	0	3	12250.9	39.227	#VALUE!	#VALUE!	1.65369	1	#VALUE!	513074	0.936637	#VALUE!	#VALUE!	0.0394858	0.0238774	#VALUE!
419	features581			8.359																		718285	18501.7		2	#DIV/0!	#DIV/0!	#DIV/0!	1	0.5	0	2	18501.7	#VALUE!	0	#VALUE!	38.8226	1	0	736787	#VALUE!	0	#VALUE!	0.974889	0.0251113	0
420	features582			8.364													812716		1.37167e+06			1.58277e+06		4.0984e+06	4	1	0	0	0.5	0	0.333333	3	1.37167e+06	1	#VALUE!	#VALUE!	1.1539	#VALUE!	2.98789	7.05283e+06	0.194485	#VALUE!	#VALUE!	0.224416	#VALUE!	0.581099
421	features584			8.378												152043					1500	80849.1			3	#DIV/0!	#DIV/0!	1	0.5	0	0	2	1500	#VALUE!	#VALUE!	1	53.8994	#VALUE!	#VALUE!	82349.1	#VALUE!	#VALUE!	0.0182151	0.981785	#VALUE!	#VALUE!
422	features585			8.387															1.31277e+06			1.99521e+06			2	1	0	0	0.5	0	0	2	1.31277e+06	1	0	#VALUE!	1.51985	#VALUE!	0	3307973	0.396849	0	#VALUE!	0.603151	#VALUE!	0
423	features586			8.388															1.64149e+06			2.64674e+06	2554732		3	1	0	0	0.5	0.333333	0	3	1.64149e+06	1	0	0	1.6124	1.55635	0	6.84296e+06	0.239881	0	0	0.386782	0.373337	0
424	features588			8.398												41383570	371408		454358			580297	1.40293e+07	1.59938e+06	6	1	0	0	0.5	0.333333	0.25	4	454358	1	#VALUE!	#VALUE!	1.27718	30.8771	3.52008	1.66633e+07	0.027267	#VALUE!	#VALUE!	0.0348248	0.841926	0.0959821
425	features589			8.398															398214				1.12521e+06		2	1	0	0	0	0.5	0	2	398214	1	0	0	#VALUE!	2.82565	0	1.52343e+06	0.261394	0	0	#VALUE!	0.738606	0
426	features590			8.401												630457			36742			130481			3	1	0	0	0.5	0	0	2	36742	1	#VALUE!	#VALUE!	3.55128	#VALUE!	#VALUE!	167223	0.219718	#VALUE!	#VALUE!	0.780282	#VALUE!	#VALUE!
427	features591			8.404													3325.5					6.11951e+06	2.50935e+06		3	#DIV/0!	#DIV/0!	#DIV/0!	1	0.5	0	2	2.50935e+06	#VALUE!	0	#VALUE!	2.43869	1	0	8.62886e+06	#VALUE!	0	#VALUE!	0.709191	0.290809	0
428	features592			8.411												3073.14						446132	226643		3	#DIV/0!	#DIV/0!	#DIV/0!	1	0.5	0	2	226643	#VALUE!	#VALUE!	#VALUE!	1.96843	1	#VALUE!	672775	#VALUE!	#VALUE!	#VALUE!	0.663122	0.336878	#VALUE!
429	features593			8.412												179467	2099.5					63468.6		784	4	#DIV/0!	#DIV/0!	#DIV/0!	1	0	0.5	2	784	#VALUE!	#VALUE!	#VALUE!	80.9548	#VALUE!	1	64252.6	#VALUE!	#VALUE!	#VALUE!	0.987798	#VALUE!	0.0122018
430	features595			8.418												1.11714e+07	75119		165988			198297	3.76036e+06	443014	6	1	0	0	0.5	0.333333	0.25	4	165988	1	#VALUE!	#VALUE!	1.19465	22.6544	2.66895	4567664	0.0363399	#VALUE!	#VALUE!	0.0434133	0.823258	0.0969891
431	features596			8.418												178104	736.5					62105.6			3	#DIV/0!	#DIV/0!	#DIV/0!	1	0	0	1	62105.6	#VALUE!	#VALUE!	0	1	#VALUE!	0	62105.6	#VALUE!	#VALUE!	0	1	#VALUE!	0
432	features598			8.42												41001.4			8282.57			27774.9	2470.86		4	1	0	0	0.5	0.333333	0	3	2470.86	3.3521	#VALUE!	#VALUE!	11.241	1	#VALUE!	38528.3	0.214974	#VALUE!	#VALUE!	0.720895	0.064131	#VALUE!
433	features599			8.429												206610			2026.57			97934.6		939.143	4	1	0	0	0.5	0	0.333333	3	939.143	2.15789	#VALUE!	#VALUE!	104.281	#VALUE!	1	100900	0.0200849	#VALUE!	#VALUE!	0.970607	#VALUE!	0.00930763
434	features600			8.432															192753			266607	163783		3	1	0	0	0.5	0.333333	0	3	163783	1.17688	#VALUE!	#VALUE!	1.62781	1	#VALUE!	623143	0.309324	#VALUE!	#VALUE!	0.427843	0.262833	#VALUE!
435	features601			8.432												204086						95410.6			2	#DIV/0!	#DIV/0!	#DIV/0!	1	0	0	1	95410.6	#VALUE!	0	0	1	#VALUE!	0	95410.6	#VALUE!	0	0	1	#VALUE!	0
436	features602			8.447													1055		48968			68951.1	117838		4	1	0	0	0.5	0.333333	0	3	48968	1	#VALUE!	#VALUE!	1.40809	2.40642	#VALUE!	235757	0.207706	#VALUE!	#VALUE!	0.292467	0.499827	#VALUE!
437	features603			8.452															47238.9			49837.7	81222.9		3	1	0	0	0.5	0.333333	0	3	47238.9	1	#VALUE!	#VALUE!	1.05502	1.71941	#VALUE!	178299	0.264941	#VALUE!	#VALUE!	0.279517	0.455542	#VALUE!
438	features604			8.462												2.61405e+06	1115					135327	45980.3		4	#DIV/0!	#DIV/0!	#DIV/0!	1	0.5	0	2	45980.3	#VALUE!	#VALUE!	#VALUE!	2.94316	1	#VALUE!	181307	#VALUE!	#VALUE!	#VALUE!	0.746396	0.253604	#VALUE!
439	features605			8.463												121246						35632.9	42564		3	#DIV/0!	#DIV/0!	#DIV/0!	1	0.5	0	2	35632.9	#VALUE!	#VALUE!	#VALUE!	1	1.19452	#VALUE!	78196.9	#VALUE!	#VALUE!	#VALUE!	0.455681	0.544319	#VALUE!
440	features606			8.463																			164815		1	#DIV/0!	#DIV/0!	#DIV/0!	#DIV/0!	1	0	1	164815	0	0	#VALUE!	#VALUE!	1	0	164815	0	0	#VALUE!	#VALUE!	1	0
441	features607			8.471												601045			1789.57			9624.71			3	1	0	0	0.5	0	0	2	1789.57	1	0	#VALUE!	5.37822	#VALUE!	#VALUE!	11414.3	0.156783	0	#VALUE!	0.843217	#VALUE!	#VALUE!
442	features608			8.475													26149.5		5958.71			1.03292e+06	161417	777	5	1	0	0	0.5	0.333333	0.25	4	777	7.66887	0	0	1329.36	207.744	1	1201068	0.00496118	0	0	0.859998	0.134394	0.000646924
443	features609			8.479												279925						2.81126e+06	600992		3	#DIV/0!	#DIV/0!	#DIV/0!	1	0.5	0	2	600992	#VALUE!	0	0	4.67769	1	0	3.41225e+06	#VALUE!	0	0	0.823872	0.176128	0
444	features610			8.485															288293			461020	346262		3	1	0	0	0.5	0.333333	0	3	288293	1	0	0	1.59914	1.20108	0	1095575	0.263143	0	0	0.420802	0.316055	0
445	features611			8.489												2.54903e+06			4062		546.571	112616	61114		5	1	0	0.5	0.333333	0.25	0	4	546.571	7.43178	#VALUE!	1	206.041	111.813	#VALUE!	178339	0.0227769	#VALUE!	0.00306479	0.631474	0.342685	#VALUE!
446	features612			8.49															282054			406980	334795		3	1	0	0	0.5	0.333333	0	3	282054	1	0	#VALUE!	1.44292	1.18699	#VALUE!	1.02383e+06	0.275489	0	#VALUE!	0.397508	0.327003	#VALUE!
447	features613			8.496												2831670						288248			2	#DIV/0!	#DIV/0!	#DIV/0!	1	0	0	1	288248	#VALUE!	#VALUE!	#VALUE!	1	#VALUE!	#VALUE!	288248	#VALUE!	#VALUE!	#VALUE!	1	#VALUE!	#VALUE!
448	features615			8.511															317145			386400	266045		3	1	0	0	0.5	0.333333	0	3	266045	1.19207	0	0	1.45238	1	0	969590	0.327092	0	0	0.398519	0.27439	0
449	features616			8.513															3276215			2.21624e+06			2	1	0	0	0.5	0	0	2	2.21624e+06	1.47828	0	0	1	#VALUE!	0	5.49245e+06	0.596494	0	0	0.403506	#VALUE!	0
450	features617			8.516												160274			3731.14	978	464.571	75894.9	42124		6	1	0.5	0.333333	0.25	0.2	0	5	464.571	8.03137	2.10517	1	163.365	90.6728	#VALUE!	123193	0.0302871	0.00793879	0.0037711	0.616067	0.341936	#VALUE!
451	features618			8.517																		2.36627e+06			1	#DIV/0!	#DIV/0!	#DIV/0!	1	0	0	1	2.36627e+06	#VALUE!	0	0	1	#VALUE!	0	2.36627e+06	#VALUE!	0	0	1	#VALUE!	0
452	features619			8.518															110950			63497.2	81076.6		3	1	0	0	0.5	0.333333	0	3	63497.2	1.74732	0	0	1	1.27685	0	255524	0.434206	0	0	0.248498	0.317296	0
453	features620			8.52												4.97774e+06			1.12021e+08			4.412e+07	2.74966e+07		4	1	0	0	0.5	0.333333	0	3	2.74966e+07	4.07399	0	0	1.60456	1	0	1.83637e+08	0.610011	0	0	0.240256	0.149733	0
454	features621			8.524															1.33217e+06			831508	700238		3	1	0	0	0.5	0.333333	0	3	700238	1.90245	0	0	1.18747	1	0	2.86392e+06	0.465157	0	0	0.29034	0.244504	0
455	features622			8.526															1.94698e+06			2.71104e+06	2.46132e+06		3	1	0	0	0.5	0.333333	0	3	1.94698e+06	1	0	0	1.39243	1.26418	0	7.11933e+06	0.273477	0	0	0.380799	0.345723	0
456	features623			8.529															1.49937e+06			2.36223e+06	2.09228e+06		3	1	0	0	0.5	0.333333	0	3	1.49937e+06	1	0	0	1.57548	1.39543	0	5.95388e+06	0.251831	0	0	0.396755	0.351414	0
457	features624			8.533																		292687	97982.5		2	#DIV/0!	#DIV/0!	#DIV/0!	1	0.5	0	2	97982.5	#VALUE!	0	0	2.98714	1	#VALUE!	390670	#VALUE!	0	0	0.749194	0.250806	#VALUE!
458	features625			8.536															142988			128042	83562.6		3	1	0	0	0.5	0.333333	0	3	83562.6	1.71115	0	0	1.53228	1	0	354592	0.403247	0	0	0.361095	0.235658	0
459	features626			8.536															363382				1113997		2	1	0	0	0	0.5	0	2	363382	1	0	0	#VALUE!	3.06563	0	1.47738e+06	0.245964	0	0	#VALUE!	0.754036	0
460	features627			8.541															561359			618141	579042		3	1	0	0	0.5	0.333333	0	3	561359	1	0	0	1.10115	1.0315	0	1.75854e+06	0.319219	0	0	0.351508	0.329274	0
461	features628			8.542												367421						124779			2	#DIV/0!	#DIV/0!	#DIV/0!	1	0	0	1	124779	#VALUE!	#VALUE!	#VALUE!	1	#VALUE!	#VALUE!	124779	#VALUE!	#VALUE!	#VALUE!	1	#VALUE!	#VALUE!
462	features629			8.544												1.94115e+06					10410.6	1026382			3	#DIV/0!	#DIV/0!	1	0.5	0	0	2	10410.6	#VALUE!	#VALUE!	1	98.5904	#VALUE!	#VALUE!	1.03679e+06	#VALUE!	#VALUE!	0.0100411	0.989959	#VALUE!	#VALUE!
463	features630			8.545															288293			461020	346262		3	1	0	0	0.5	0.333333	0	3	288293	1	0	0	1.59914	1.20108	0	1095575	0.263143	0	0	0.420802	0.316055	0
464	features631			8.549												27430			25120.3		1496	81285.1	208923		5	1	0	0.5	0.333333	0.25	0	4	1496	16.7916	#VALUE!	1	54.335	139.654	#VALUE!	316824	0.0792878	#VALUE!	0.00472186	0.256562	0.659428	#VALUE!
465	features633			8.555															240598			193984	182107		3	1	0	0	0.5	0.333333	0	3	182107	1.32119	0	0	1.06522	1	0	616690	0.390145	0	0	0.314558	0.295298	0
466	features634			8.559																	148444				1	#DIV/0!	#DIV/0!	1	0	0	0	1	148444	#VALUE!	0	1	#VALUE!	#VALUE!	#VALUE!	148444	#VALUE!	0	1	#VALUE!	#VALUE!	#VALUE!
468	features637			8.59												4.12641e+06	8824.5		4401.71		9265.71	1.67534e+06			5	1	0	0.5	0.333333	0	0	3	4401.71	1	#VALUE!	2.10502	380.61	#VALUE!	#VALUE!	1.689e+06	0.0026061	#VALUE!	0.0054859	0.991908	#VALUE!	#VALUE!
469	features638			8.592												284213	173106					318999			3	#DIV/0!	#DIV/0!	#DIV/0!	1	0	0	1	318999	#VALUE!	#VALUE!	#VALUE!	1	#VALUE!	#VALUE!	318999	#VALUE!	#VALUE!	#VALUE!	1	#VALUE!	#VALUE!
470	features639			8.599												444651				986.286		107694	182791		4	#DIV/0!	1	0	0.5	0.333333	0	3	986.286	#VALUE!	1	#VALUE!	109.191	185.333	#VALUE!	291471	#VALUE!	0.00338382	#VALUE!	0.369483	0.627133	#VALUE!
471	features640			8.609												51394.1	839.5					856.429	30817.6		4	#DIV/0!	#DIV/0!	#DIV/0!	1	0.5	0	2	856.429	#VALUE!	0	#VALUE!	1	35.9838	#VALUE!	31674	#VALUE!	0	#VALUE!	0.0270389	0.972961	#VALUE!
472	features641			8.628															1.65626e+06			2721077			2	1	0	0	0.5	0	0	2	1.65626e+06	1	0	0	1.64291	#VALUE!	0	4.37734e+06	0.378371	0	0	0.621629	#VALUE!	0
473	features642			8.641												211210	6322.5		9365.14		739.429				4	1	0	0.5	0	0	0	2	739.429	12.6654	#VALUE!	1	#VALUE!	#VALUE!	#VALUE!	10104.6	0.926822	#VALUE!	0.0731776	#VALUE!	#VALUE!	#VALUE!
474	features643			8.641												353443	94658		21840.8			291367	770489		5	1	0	0	0.5	0.333333	0	3	21840.8	1	0	0	13.3405	35.2775	0	1.0837e+06	0.020154	0	0	0.268864	0.710982	0
475	features644			8.646											617				7.31855e+06			1.28903e+07	1.15216e+07		3	1	0	0	0.5	0.333333	0	3	7.31855e+06	1	#VALUE!	#VALUE!	1.76132	1.57429	0	3.17304e+07	0.230648	#VALUE!	#VALUE!	0.406244	0.363108	0
476	features645			8.648												3074730	12935.5		2767.14	1317.43	2696.29	1.2125e+06		3099.43	7	1	0.5	0.333333	0.25	0	0.2	5	1317.43	2.10041	1	2.04663	920.353	#VALUE!	2.35264	1.22238e+06	0.00226373	0.00107776	0.00220577	0.991917	#VALUE!	0.00253557
477	features646			8.65												939813				791.143	1224.86	196794		924	5	#DIV/0!	1	0.5	0.333333	0	0.25	4	791.143	#VALUE!	1	1.54821	248.746	#VALUE!	1.16793	199734	#VALUE!	0.00396098	0.00613244	0.98528	#VALUE!	0.00462615
478	features647			8.657															1.22279e+06			3.04867e+06	3.00822e+06		3	1	0	0	0.5	0.333333	0	3	1.22279e+06	1	0	0	2.49322	2.46014	0	7.27968e+06	0.167972	0	0	0.418792	0.413235	0
479	features648			8.667												233403			5687.71			1556.86	57590.6	5834.29	5	1	0	0	0.5	0.333333	0.25	4	1556.86	3.65333	#VALUE!	#VALUE!	1	36.9916	3.74748	70669.4	0.0804834	#VALUE!	#VALUE!	0.0220301	0.814929	0.0825574
480	features649			8.672												7.04522e+06				2791.71	1.53134e+07	17195.1	231624		5	#DIV/0!	1	0.5	0.333333	0.25	0	4	2791.71	#VALUE!	1	5485.31	6.15935	82.9685	#VALUE!	1.5565e+07	#VALUE!	0.000179358	0.983835	0.00110473	0.0148811	#VALUE!
481	features650			8.674												154910			8400.29	1549.71	1596.29	29542.3		3171.71	6	1	0.5	0.333333	0.25	0	0.2	5	1549.71	5.42054	1	1.03005	19.0631	#VALUE!	2.04664	44260.3	0.189793	0.0350137	0.0360659	0.667467	#VALUE!	0.0716605
482	features651			8.675												3.22783e+06						738235	9442		3	#DIV/0!	#DIV/0!	#DIV/0!	1	0.5	0	2	9442	#VALUE!	#VALUE!	#VALUE!	78.1863	1	#VALUE!	747677	#VALUE!	#VALUE!	#VALUE!	0.987372	0.0126284	#VALUE!
483	features652			8.684												4580.14	7669.5					101557	78521.6		4	#DIV/0!	#DIV/0!	#DIV/0!	1	0.5	0	2	78521.6	0	#VALUE!	0	1.29336	1	#VALUE!	180078	0	#VALUE!	0	0.563959	0.436041	#VALUE!
484	features654			8.691												462203						10993.7	188064	11040.9	4	#DIV/0!	#DIV/0!	#DIV/0!	1	0.5	0.333333	3	10993.7	0	#VALUE!	#VALUE!	1	17.1065	1.00429	210099	0	#VALUE!	#VALUE!	0.0523265	0.895123	0.0525508
485	features655			8.696												520284	15054			11451.7	78040.9	25254	273593	10826.3	7	#DIV/0!	1	0.5	0.333333	0.25	0.2	5	10826.3	#VALUE!	1.05777	7.20846	2.33266	25.2712	1	399166	#VALUE!	0.0286891	0.19551	0.0632669	0.685412	0.0271222
486	features656			8.7												704763			1.46337e+06		530943	299733	1.23056e+06		5	1	0	0.5	0.333333	0.25	0	4	299733	4.88226	#VALUE!	1.77139	1	4.10551	#VALUE!	3.5246e+06	0.415188	#VALUE!	0.150639	0.0850401	0.349133	#VALUE!
487	features657			8.709												3.25246e+06	2729368		10275.4			4.92054e+06	9.5496e+06		5	1	0	0	0.5	0.333333	0	3	10275.4	1	#VALUE!	#VALUE!	478.865	929.363	#VALUE!	1.44804e+07	0.000709608	#VALUE!	#VALUE!	0.339807	0.659484	#VALUE!
488	features658			8.712												385401	2301.5					87451.4	81724.9		4	#DIV/0!	#DIV/0!	#DIV/0!	1	0.5	0	2	81724.9	#VALUE!	#VALUE!	#VALUE!	1.07007	1	#VALUE!	169176	#VALUE!	#VALUE!	#VALUE!	0.516925	0.483075	#VALUE!
489	features660			8.718												2.47611e+06	5496			10736.1		1.70902e+06	32325.9		5	#DIV/0!	1	0	0.5	0.333333	0	3	10736.1	0	1	#VALUE!	159.184	3.01094	#VALUE!	1.75208e+06	0	0.00612764	#VALUE!	0.975422	0.01845	#VALUE!
490	features661			8.723												5.42019e+06			11597.3			183602	2.55054e+06		4	1	0	0	0.5	0.333333	0	3	11597.3	1	0	#VALUE!	15.8314	219.926	#VALUE!	2745739	0.00422374	0	#VALUE!	0.0668678	0.928908	#VALUE!
491	features662			8.723												3.17843e+06				5586		922942	10844.6		4	#DIV/0!	1	0	0.5	0.333333	0	3	5586	#VALUE!	1	#VALUE!	165.224	1.94138	#VALUE!	939373	#VALUE!	0.00594652	#VALUE!	0.982509	0.0115445	#VALUE!
492	features663			8.724												1.58856e+06							22539.1	4896	3	#DIV/0!	#DIV/0!	#DIV/0!	#DIV/0!	1	0.5	2	4896	#VALUE!	#VALUE!	#VALUE!	#VALUE!	4.60358	1	27435.1	#VALUE!	#VALUE!	#VALUE!	#VALUE!	0.821543	0.178457
493	features666			8.732												3.6466e+06	15867		21167.1	36257.1		131466	348959		6	1	0.5	0	0.333333	0.25	0	4	21167.1	1	1.7129	#VALUE!	6.21084	16.4859	#VALUE!	537849	0.0393551	0.0674113	#VALUE!	0.244428	0.648805	#VALUE!
494	features667			8.741													15867		21167.1	36257.1		131466	348959		5	1	0.5	0	0.333333	0.25	0	4	21167.1	1	1.7129	#VALUE!	6.21084	16.4859	#VALUE!	537849	0.0393551	0.0674113	#VALUE!	0.244428	0.648805	#VALUE!
495	features669			8.748												205764						390669	9512		3	#DIV/0!	#DIV/0!	#DIV/0!	1	0.5	0	2	9512	#VALUE!	0	#VALUE!	41.0711	1	#VALUE!	400181	#VALUE!	0	#VALUE!	0.976231	0.0237693	#VALUE!
497	features671			8.752												520330	1159					185074	3935.14		4	#DIV/0!	#DIV/0!	#DIV/0!	1	0.5	0	2	3935.14	#VALUE!	#VALUE!	#VALUE!	47.0311	1	#VALUE!	189009	#VALUE!	#VALUE!	#VALUE!	0.97918	0.0208199	#VALUE!
498	features672			8.753												387441						283886	16280.9		3	#DIV/0!	#DIV/0!	#DIV/0!	1	0.5	0	2	16280.9	#VALUE!	#VALUE!	#VALUE!	17.4368	1	#VALUE!	300167	#VALUE!	#VALUE!	#VALUE!	0.945761	0.0542393	#VALUE!
499	features673			8.754												25955.7	2289					104407	3333.43		4	#DIV/0!	#DIV/0!	#DIV/0!	1	0.5	0	2	3333.43	#VALUE!	#VALUE!	#VALUE!	31.3212	1	#VALUE!	107740	#VALUE!	#VALUE!	#VALUE!	0.969061	0.0309395	#VALUE!
500	features675			8.763												62934.3							596532		2	#DIV/0!	#DIV/0!	#DIV/0!	#DIV/0!	1	0	1	596532	#VALUE!	#VALUE!	#VALUE!	#VALUE!	1	#VALUE!	596532	#VALUE!	#VALUE!	#VALUE!	#VALUE!	1	#VALUE!
501	features676			8.766											766	1.99132e+06	7326		373312	178971		242950			5	1	0.5	0	0.333333	0	0	3	178971	2.08588	1	#VALUE!	1.35748	#VALUE!	0	795232	0.469437	0.225055	#VALUE!	0.305508	#VALUE!	0
502	features677			8.775															1.36518e+06			2.2238e+06	2.08555e+06		3	1	0	0	0.5	0.333333	0	3	1.36518e+06	1	0	0	1.62894	1.52767	0	5.67454e+06	0.240581	0	0	0.391891	0.367528	0
503	features678			8.775													4387					7129.07	30406.2		3	#DIV/0!	#DIV/0!	#DIV/0!	1	0.5	0	2	7129.07	0	0	#VALUE!	1	4.2651	#VALUE!	37535.3	0	0	#VALUE!	0.18993	0.81007	#VALUE!
504	features679			8.787												1791670			497983	237580	951.714	12231.4	17559.4		6	1	0.5	0.333333	0.25	0.2	0	5	951.714	523.249	249.634	1	12.852	18.4503	#VALUE!	766306	0.649849	0.310033	0.00124195	0.0159615	0.0229144	#VALUE!
505	features680			8.79												1.93309e+07	3840.5		59429.9		9443				4	1	0	0.5	0	0	0	2	9443	6.29354	0	1	#VALUE!	#VALUE!	#VALUE!	68872.9	0.862892	0	0.137108	#VALUE!	#VALUE!	#VALUE!
506	features681			8.791												290897						89591.6			2	#DIV/0!	#DIV/0!	#DIV/0!	1	0	0	1	89591.6	0	#VALUE!	0	1	#VALUE!	0	89591.6	0	#VALUE!	0	1	#VALUE!	0
507	features682			8.795												768640			46936.3	22007.7	11710	376418			5	1	0.5	0.333333	0.25	0	0	4	11710	4.00822	1.87939	1	32.145	#VALUE!	#VALUE!	457072	0.102689	0.0481493	0.0256196	0.823542	#VALUE!	#VALUE!
508	features683			8.797												33998.6							34038.6	4178	3	#DIV/0!	#DIV/0!	#DIV/0!	#DIV/0!	1	0.5	2	4178	#VALUE!	#VALUE!	#VALUE!	#VALUE!	8.1471	1	38216.6	#VALUE!	#VALUE!	#VALUE!	#VALUE!	0.890676	0.109324
509	features684			8.8												1.26729e+07			33964.3	5003.71	526.857	1.89963e+06			5	1	0.5	0.333333	0.25	0	0	4	526.857	64.4658	9.49729	1	3605.59	#VALUE!	#VALUE!	1.93913e+06	0.0175152	0.0025804	0.000271698	0.979633	#VALUE!	#VALUE!
510	features685			8.81												181600						143964	289575		3	#DIV/0!	#DIV/0!	#DIV/0!	1	0.5	0	2	143964	#VALUE!	#VALUE!	#VALUE!	1	2.01144	#VALUE!	433539	#VALUE!	#VALUE!	#VALUE!	0.332067	0.667933	#VALUE!
511	features686			8.815																		23112.6	136299		2	#DIV/0!	#DIV/0!	#DIV/0!	1	0.5	0	2	23112.6	0	0	0	1	5.89719	0	159412	0	0	0	0.144987	0.855013	0
512	features687			8.828												343169	10146.5					13660.9	157927	14082.6	5	#DIV/0!	#DIV/0!	#DIV/0!	1	0.5	0.333333	3	13660.9	#VALUE!	#VALUE!	#VALUE!	1	11.5606	1.03087	185671	#VALUE!	#VALUE!	#VALUE!	0.0735757	0.850577	0.075847
513	features688			8.828												447010			148217	58752.3		26677.1	25704.6		5	1	0.5	0	0.333333	0.25	0	4	25704.6	5.76618	2.28567	#VALUE!	1.03784	1	#VALUE!	259351	0.571492	0.226536	#VALUE!	0.102861	0.0991111	#VALUE!
514	features689			8.856												1.73176e+06			3030.71			55347	691472	369580	5	1	0	0	0.5	0.333333	0.25	4	3030.71	1	#VALUE!	#VALUE!	18.262	228.155	121.945	1.11943e+06	0.00270737	#VALUE!	#VALUE!	0.0494421	0.6177	0.33015
515	features690			8.863												4937.14			2551.43			11299.4	18038.9	2369.71	5	1	0	0	0.5	0.333333	0.25	4	2369.71	1.07668	#VALUE!	#VALUE!	4.76827	7.61225	1	34259.4	0.0744738	#VALUE!	#VALUE!	0.32982	0.526537	0.0691697
516	features691			8.868												2.27494e+06			441675			749926	15390		4	1	0	0	0.5	0.333333	0	3	15390	28.6988	#VALUE!	#VALUE!	48.7282	1	#VALUE!	1.20699e+06	0.36593	#VALUE!	#VALUE!	0.621319	0.0127507	#VALUE!
517	features692			8.87												289513			129416			55165.1			3	1	0	0	0.5	0	0	2	55165.1	2.34597	#VALUE!	#VALUE!	1	0	#VALUE!	184581	0.701133	#VALUE!	#VALUE!	0.298867	0	#VALUE!
518	features695			8.89												300823			3959.43			166985	663529		4	1	0	0	0.5	0.333333	0	3	3959.43	1	0	0	42.1741	167.582	0	834474	0.00474482	0	0	0.200109	0.795147	0
519	features699			8.905															1211094			1928964	1.79555e+06		3	1	0	0	0.5	0.333333	0	3	1211094	1	0	0	1.59275	1.48258	0	4.9356e+06	0.245379	0	0	0.390826	0.363795	0
520	features700			8.912																			778844		1	#DIV/0!	#DIV/0!	#DIV/0!	#DIV/0!	1	0	1	778844	#VALUE!	#VALUE!	0	#VALUE!	1	0	778844	#VALUE!	#VALUE!	0	#VALUE!	1	0
521	features702			8.918												127304	1839.5		31964.6	943.714	1422.86	42721.7	976.857		7	1	0.5	0.333333	0.25	0.2	0	5	943.714	33.871	1	1.50772	45.2698	1.03512	#VALUE!	78029.7	0.409646	0.0120943	0.0182348	0.547506	0.012519	#VALUE!
522	features703			8.921												1.64497e+06	19945		49578		1676.86	401847	8936.29		6	1	0	0.5	0.333333	0.25	0	4	1676.86	29.566	#VALUE!	1	239.643	5.32919	#VALUE!	462038	0.107303	#VALUE!	0.00362926	0.869727	0.019341	#VALUE!
523	features705			8.926												722366	27810.5		183879			208897	58040.1		5	1	0	0	0.5	0.333333	0	3	58040.1	3.16814	#VALUE!	#VALUE!	3.59918	1	#VALUE!	450816	0.407881	#VALUE!	#VALUE!	0.463375	0.128745	#VALUE!
524	features706			8.937												72084.9	35312.5					93078	187391		4	#DIV/0!	#DIV/0!	#DIV/0!	1	0.5	0	2	93078	#VALUE!	#VALUE!	#VALUE!	1	2.01327	0	280469	#VALUE!	#VALUE!	#VALUE!	0.331866	0.668134	0
525	features707			8.938												16002	6715.5					49433.1	336217		4	#DIV/0!	#DIV/0!	#DIV/0!	1	0.5	0	2	49433.1	0	0	0	1	6.80145	#VALUE!	385650	0	0	0	0.128181	0.871819	#VALUE!
526	features708			8.943												1.50273e+06	2599.5		5252			173119	1080.29	1433.43	6	1	0	0	0.5	0.333333	0.25	4	1080.29	4.86168	#VALUE!	#VALUE!	160.253	1	1.3269	180885	0.029035	#VALUE!	#VALUE!	0.957068	0.00597222	0.00792452
528	features711			8.95												17448.4			5100.71		5744.14				3	1	0	0.5	0	0	0	2	5100.71	1	#VALUE!	1.12614	0	#VALUE!	#VALUE!	10844.9	0.470335	#VALUE!	0.529665	0	#VALUE!	#VALUE!
529	features712			8.96																			195914		1	#DIV/0!	#DIV/0!	#DIV/0!	#DIV/0!	1	0	1	195914	#VALUE!	0	0	#VALUE!	1	0	195914	#VALUE!	0	0	#VALUE!	1	0
530	features713			8.962																	495075		64515.1		2	#DIV/0!	#DIV/0!	1	0	0.5	0	2	64515.1	#VALUE!	#VALUE!	7.67378	#VALUE!	1	#VALUE!	559590	#VALUE!	#VALUE!	0.88471	#VALUE!	0.11529	#VALUE!
531	features714			8.962																		126480	125546		2	#DIV/0!	#DIV/0!	#DIV/0!	1	0.5	0	2	125546	#VALUE!	0	0	1.00744	1	0	252027	#VALUE!	0	0	0.501853	0.498147	0
532	features715			8.964												33453.9					96680.1		2.4905e+06		3	#DIV/0!	#DIV/0!	1	0	0.5	0	2	96680.1	#VALUE!	0	1	#VALUE!	25.7602	0	2.58718e+06	#VALUE!	0	0.037369	#VALUE!	0.962631	0
533	features716			8.98												3.08541e+06			6842.86	6097.71		1.4024e+06	21702		5	1	0.5	0	0.333333	0.25	0	4	6097.71	1.1222	1	#VALUE!	229.988	3.55904	#VALUE!	1.43704e+06	0.00476176	0.00424324	#VALUE!	0.975893	0.0151019	#VALUE!
534	features717			8.984												218787			64268			56366.9	5722.29		4	1	0	0	0.5	0.333333	0	3	5722.29	11.2312	#VALUE!	#VALUE!	9.85041	1	#VALUE!	126357	0.508622	#VALUE!	#VALUE!	0.446092	0.0452866	#VALUE!
535	features718			8.987												2.55088e+06	9152		31883.4		8991.14	889300	6004.29		6	1	0	0.5	0.333333	0.25	0	4	6004.29	5.31011	#VALUE!	1.49745	148.111	1	#VALUE!	936179	0.034057	#VALUE!	0.00960409	0.949925	0.00641361	#VALUE!
536	features719			8.987												372431						41311.6	121291		3	#DIV/0!	#DIV/0!	#DIV/0!	1	0.5	0	2	41311.6	#VALUE!	#VALUE!	0	1	2.93601	#VALUE!	162603	#VALUE!	#VALUE!	0	0.254064	0.745936	#VALUE!
537	features720			9												84127	70131.5					502371	161219		4	#DIV/0!	#DIV/0!	#DIV/0!	1	0.5	0	2	161219	#VALUE!	0	0	3.11607	1	#VALUE!	663590	#VALUE!	0	0	0.75705	0.24295	#VALUE!
538	features721			9.001															493015			1751948	1.73272e+06		3	1	0	0	0.5	0.333333	0	3	493015	1	0	#VALUE!	3.55354	3.51453	0	3977680	0.123945	0	#VALUE!	0.440445	0.43561	0
539	features722			9.003												1.13404e+06			3592.29			3.09518e+06			3	1	0	0	0.5	0	0	2	3592.29	1	0	0	861.617	#VALUE!	0	3098768	0.00115926	0	0	0.998841	#VALUE!	0
540	features723			9.004												3.17811e+06					2901.14		34613.4		3	#DIV/0!	#DIV/0!	1	0	0.5	0	2	2901.14	#VALUE!	#VALUE!	1	#VALUE!	11.931	#VALUE!	37514.6	#VALUE!	#VALUE!	0.0773338	#VALUE!	0.922666	#VALUE!
541	features724			9.007												498633					2197.43	61536.9			3	#DIV/0!	#DIV/0!	1	0.5	0	0	2	2197.43	0	0	1	28.004	#VALUE!	0	63734.3	0	0	0.034478	0.965522	#VALUE!	0
542	features725			9.013											659	930997							6163		2	#DIV/0!	#DIV/0!	#DIV/0!	#DIV/0!	1	0	1	6163	#VALUE!	#VALUE!	0	#VALUE!	1	#VALUE!	6163	#VALUE!	#VALUE!	0	#VALUE!	1	#VALUE!
543	features726			9.014																7574.86		1.63876e+06	27208		3	#DIV/0!	1	0	0.5	0.333333	0	3	7574.86	#VALUE!	1	#VALUE!	216.343	3.59188	#VALUE!	1.67355e+06	#VALUE!	0.00452623	#VALUE!	0.979216	0.0162577	#VALUE!
544	features727			9.016															493015			1751948	1.73272e+06		3	1	0	0	0.5	0.333333	0	3	493015	1	0	#VALUE!	3.55354	3.51453	0	3977680	0.123945	0	#VALUE!	0.440445	0.43561	0
545	features729			9.032												564849	7693		37364.9			188085	840		5	1	0	0	0.5	0.333333	0	3	840	44.482	#VALUE!	#VALUE!	223.91	1	#VALUE!	226289	0.16512	#VALUE!	#VALUE!	0.831168	0.00371206	#VALUE!
546	features730			9.035															3.6594e+06			7.56997e+06	6.58662e+06		3	1	0	0	0.5	0.333333	0	3	3.6594e+06	1	#VALUE!	#VALUE!	2.06863	1.79992	0	1.7816e+07	0.2054	#VALUE!	#VALUE!	0.424897	0.369703	0
547	features731			9.035												3.90915e+06			1109442	101246		1066096	32045.7		5	1	0.5	0	0.333333	0.25	0	4	32045.7	34.6206	3.15942	#VALUE!	33.268	1	#VALUE!	2.30883e+06	0.480521	0.0438517	#VALUE!	0.461747	0.0138796	#VALUE!
548	features732			9.037												483154			24354.3	30587.1	13638.9	47904.9			5	1	0.5	0.333333	0.25	0	0	4	13638.9	1.78565	2.24265	1	3.51238	#VALUE!	#VALUE!	116485	0.209076	0.262584	0.117087	0.411253	#VALUE!	#VALUE!
549	features733			9.041												803873						379920	7949.43		3	#DIV/0!	#DIV/0!	#DIV/0!	1	0.5	0	2	7949.43	#VALUE!	#VALUE!	#VALUE!	47.7922	1	#VALUE!	387870	#VALUE!	#VALUE!	#VALUE!	0.979505	0.0204951	#VALUE!
550	features734			9.068												235949	2673		2750.29			18559.4	24478.6		5	1	0	0	0.5	0.333333	0	3	2750.29	1	#VALUE!	#VALUE!	6.74818	8.90037	#VALUE!	45788.3	0.0600653	#VALUE!	#VALUE!	0.405331	0.534603	#VALUE!
551	features735			9.075												63887.1						108858	258667		3	#DIV/0!	#DIV/0!	#DIV/0!	1	0.5	0	2	108858	#VALUE!	#VALUE!	#VALUE!	1	2.37618	#VALUE!	367525	#VALUE!	#VALUE!	#VALUE!	0.296193	0.703807	#VALUE!
552	features736			9.076												3.83114e+06			36961.4	3107.43		396634	113099		5	1	0.5	0	0.333333	0.25	0	4	3107.43	11.8945	1	#VALUE!	127.641	36.3962	#VALUE!	549802	0.0672268	0.00565191	#VALUE!	0.721413	0.205708	#VALUE!
553	features737			9.081												3.31891e+06	13910.5					1.02324e+06	7898.57		4	#DIV/0!	#DIV/0!	#DIV/0!	1	0.5	0	2	7898.57	#VALUE!	#VALUE!	#VALUE!	129.548	1	#VALUE!	1.03114e+06	#VALUE!	#VALUE!	#VALUE!	0.99234	0.00766003	#VALUE!
554	features739			9.091												8394.43			1485.29			96226.1	52729		4	1	0	0	0.5	0.333333	0	3	1485.29	1	0	#VALUE!	64.7863	35.5009	0	150440	0.00987292	0	#VALUE!	0.63963	0.350498	0
555	features740			9.096												284243			4750.57	1463.14		87056.6	847.429		5	1	0.5	0	0.333333	0.25	0	4	847.429	5.60587	1.72657	#VALUE!	102.73	1	#VALUE!	94117.7	0.0504748	0.0155459	#VALUE!	0.924975	0.00900392	#VALUE!
556	features741			9.1												244464	7811.5			1677.14		44798.9	218181		5	#DIV/0!	1	0	0.5	0.333333	0	3	1677.14	#VALUE!	1	#VALUE!	26.7114	130.091	#VALUE!	264657	#VALUE!	0.00633705	#VALUE!	0.169272	0.824391	#VALUE!
557	features742			9.113												340737						48023.7	186703		3	#DIV/0!	#DIV/0!	#DIV/0!	1	0.5	0	2	48023.7	#VALUE!	#VALUE!	#VALUE!	1	3.88772	#VALUE!	234726	#VALUE!	#VALUE!	#VALUE!	0.204595	0.795405	#VALUE!
558	features743			9.114													5937.5		10371.7			107458	216307		4	1	0	0	0.5	0.333333	0	3	10371.7	1	0	0	10.3607	20.8554	0	334136	0.0310404	0	0	0.321599	0.64736	0
559	features744			9.136																		6456.07	103352		2	#DIV/0!	#DIV/0!	#DIV/0!	1	0.5	0	2	6456.07	#VALUE!	#VALUE!	#VALUE!	1	16.0085	#VALUE!	109808	#VALUE!	#VALUE!	#VALUE!	0.0587941	0.941206	#VALUE!
560	features745			9.138												2435480				1867.14		425028	777005	16097.7	5	#DIV/0!	1	0	0.5	0.333333	0.25	4	1867.14	#VALUE!	1	#VALUE!	227.636	416.146	8.62158	1219998	#VALUE!	0.00153045	#VALUE!	0.348384	0.63689	0.0131949
561	features746			9.145															492796			1.03485e+06	485616		3	1	0	0	0.5	0.333333	0	3	485616	1.01478	#VALUE!	0	2.13099	1	0	2.01326e+06	0.244775	#VALUE!	0	0.514016	0.241209	0
562	features747			9.149												53909.3			3960.71				4429.86		3	1	0	0	0	0.5	0	2	3960.71	1	#VALUE!	#VALUE!	#VALUE!	1.11845	#VALUE!	8390.57	0.472043	#VALUE!	#VALUE!	#VALUE!	0.527957	#VALUE!
563	features748			9.151												28944.1	139782		223925			67961	67419.9		5	1	0	0	0.5	0.333333	0	3	67419.9	3.32136	0	0	1.00803	1	0	359306	0.623216	0	0	0.189145	0.187639	0
564	features749			9.154												2.02948e+06						306705			2	#DIV/0!	#DIV/0!	#DIV/0!	1	0	0	1	306705	#VALUE!	0	#VALUE!	1	0	#VALUE!	306705	#VALUE!	0	#VALUE!	1	0	#VALUE!
565	features751			9.156															507543			976689	498731		3	1	0	0	0.5	0.333333	0	3	498731	1.01767	0	0	1.95835	1	0	1.98296e+06	0.255952	0	0	0.49254	0.251508	0
566	features752			9.166												2.32939e+06			159504	246097			35159.1		4	1	0.5	0	0	0.333333	0	3	35159.1	4.53662	6.99952	#VALUE!	#VALUE!	1	#VALUE!	440760	0.361883	0.558347	#VALUE!	#VALUE!	0.0797694	#VALUE!
567	features753			9.183												67458.6	5473			2511.71		29407.1	903.429	1620	6	#DIV/0!	1	0	0.5	0.333333	0.25	4	903.429	#VALUE!	2.7802	#VALUE!	32.5506	1	1.79317	34442.3	#VALUE!	0.0729253	#VALUE!	0.853809	0.0262302	0.0470352
568	features754			9.187												5.54539e+06				9500.57		1.26889e+06		8143.43	4	#DIV/0!	1	0	0.5	0	0.333333	3	8143.43	#VALUE!	1.16665	#VALUE!	155.817	#VALUE!	1	1.28653e+06	#VALUE!	0.00738464	#VALUE!	0.986286	#VALUE!	0.00632976
569	features755			9.188													3881.5		71068	4750.57			1522.29	1114.86	5	1	0.5	0	0	0.333333	0.25	4	1114.86	63.7463	4.26115	#VALUE!	#VALUE!	1.36545	1	78455.7	0.905836	0.060551	#VALUE!	#VALUE!	0.0194031	0.01421
570	features757			9.199																		537758	12778.4		2	#DIV/0!	#DIV/0!	#DIV/0!	1	0.5	0	2	12778.4	#VALUE!	0	#VALUE!	42.0833	1	#VALUE!	550537	#VALUE!	0	#VALUE!	0.976789	0.0232109	#VALUE!
571	features758			9.2												39177	13941.5					37219	166973		4	#DIV/0!	#DIV/0!	#DIV/0!	1	0.5	0	2	37219	0	0	#VALUE!	1	4.48623	0	204192	0	0	#VALUE!	0.182275	0.817725	0
572	features759			9.203												541244						126952			2	#DIV/0!	#DIV/0!	#DIV/0!	1	0	0	1	126952	0	0	#VALUE!	1	0	#VALUE!	126952	0	0	#VALUE!	1	0	#VALUE!
573	features760			9.206												31302.9	4744.5		1677.71	1505.71		468861			5	1	0.5	0	0.333333	0	0	3	1505.71	1.11423	1	#VALUE!	311.387	#VALUE!	#VALUE!	472044	0.00355415	0.00318978	#VALUE!	0.993256	#VALUE!	#VALUE!
574	features762			9.212												154026	2280		3627.71	1180		1.10694e+06	1.13583e+06		6	1	0.5	0	0.333333	0.25	0	4	1180	3.07433	1	0	938.085	962.571	#VALUE!	2247582	0.00161405	0.000525009	0	0.492503	0.505358	#VALUE!
575	features763			9.213												2.3598e+06	4234		6584			122093	590400		5	1	0	0	0.5	0.333333	0	3	6584	1	#VALUE!	#VALUE!	18.5438	89.6719	#VALUE!	719076	0.00915619	#VALUE!	#VALUE!	0.169791	0.821053	#VALUE!
576	features765			9.22												1.25332e+07	3732		89018.8			1.02115e+06	30675.6		5	1	0	0	0.5	0.333333	0	3	30675.6	2.90194	0	0	33.2885	1	0	1.14084e+06	0.0780291	0	0	0.895082	0.0268886	0
577	features766			9.238												1.22787e+06						144462	806084	16524	4	#DIV/0!	#DIV/0!	#DIV/0!	1	0.5	0.333333	3	16524	#VALUE!	#VALUE!	#VALUE!	8.74254	48.7826	1	967070	#VALUE!	#VALUE!	#VALUE!	0.149381	0.833533	0.0170867
578	features767			9.239												6.21413e+06						2.07577e+06	19296.6		3	#DIV/0!	#DIV/0!	#DIV/0!	1	0.5	0	2	19296.6	#VALUE!	#VALUE!	#VALUE!	107.572	1	#VALUE!	2.09507e+06	#VALUE!	#VALUE!	#VALUE!	0.99079	0.00921048	#VALUE!
579	features768			9.246												207244	6463.5		6529.29			876506			4	1	0	0	0.5	0	0	2	6529.29	1	0	0	134.242	#VALUE!	#VALUE!	883036	0.00739414	0	0	0.992606	#VALUE!	#VALUE!
580	features769			9.249																		37450.6	1.22064e+06		2	#DIV/0!	#DIV/0!	#DIV/0!	1	0.5	0	2	37450.6	#VALUE!	#VALUE!	#VALUE!	1	32.5933	#VALUE!	1.25809e+06	#VALUE!	#VALUE!	#VALUE!	0.0297679	0.970232	#VALUE!
581	features770			9.249												232977			396463	6272.29					3	1	0.5	0	0	0	0	2	6272.29	63.2086	1	#VALUE!	0	#VALUE!	0	402735	0.984426	0.0155742	#VALUE!	0	#VALUE!	0
582	features771			9.251												6.48757e+06				54199.4		2.98619e+06	60314.9		4	#DIV/0!	1	0	0.5	0.333333	0	3	54199.4	#VALUE!	1	#VALUE!	55.0963	1.11283	#VALUE!	3.1007e+06	#VALUE!	0.0174797	#VALUE!	0.963068	0.019452	#VALUE!
583	features772			9.253															5156.57			142585	1086.57		3	1	0	0	0.5	0.333333	0	3	1086.57	4.74573	#VALUE!	#VALUE!	131.225	1	#VALUE!	148829	0.0346477	#VALUE!	#VALUE!	0.958051	0.00730083	#VALUE!
584	features773			9.256												216141	9991					43846.9	245481	1536.86	5	#DIV/0!	#DIV/0!	#DIV/0!	1	0.5	0.333333	3	1536.86	#VALUE!	#VALUE!	#VALUE!	28.5302	159.729	1	290865	#VALUE!	#VALUE!	#VALUE!	0.150746	0.84397	0.00528375
585	features774			9.265											1039	20652.7			8779.57			48350.7	307638		4	1	0	0	0.5	0.333333	0	3	8779.57	1	0	#VALUE!	5.50718	35.0402	0	364768	0.0240689	0	#VALUE!	0.132552	0.843379	0
586	features775			9.266												1.73458e+06	1173.5				245289	112091	9364.57	3041.71	6	#DIV/0!	#DIV/0!	1	0.5	0.333333	0.25	4	3041.71	#VALUE!	#VALUE!	80.6418	36.8512	3.07872	1	369787	#VALUE!	#VALUE!	0.663327	0.303123	0.0253243	0.00822559
587	features776			9.273												2.67979e+06	1261			694	5344.29	1.24841e+06	1832.86		6	#DIV/0!	1	0.5	0.333333	0.25	0	4	694	#VALUE!	1	7.7007	1798.87	2.641	#VALUE!	1.25629e+06	#VALUE!	0.000552422	0.00425404	0.993735	0.00145895	#VALUE!
588	features777			9.276												373441						157272	85762.6		3	#DIV/0!	#DIV/0!	#DIV/0!	1	0.5	0	2	85762.6	#VALUE!	#VALUE!	#VALUE!	1.83381	1	#VALUE!	243035	#VALUE!	#VALUE!	#VALUE!	0.647118	0.352882	#VALUE!
589	features778			9.28															879890			2.22616e+06	2.5294e+06		3	1	0	0	0.5	0.333333	0	3	879890	1	#VALUE!	#VALUE!	2.53004	2.87468	0	5.63545e+06	0.156135	#VALUE!	#VALUE!	0.395028	0.448837	0
590	features779			9.285												3296.86	1304		1734.29			202257	133557		5	1	0	0	0.5	0.333333	0	3	1734.29	1	0	0	116.623	77.0097	#VALUE!	337548	0.00513789	0	0	0.599195	0.395667	#VALUE!
591	features780			9.289												60416.3							63704		2	#DIV/0!	#DIV/0!	#DIV/0!	#DIV/0!	1	0	1	63704	#VALUE!	#VALUE!	#VALUE!	#VALUE!	1	#VALUE!	63704	#VALUE!	#VALUE!	#VALUE!	#VALUE!	1	#VALUE!
592	features781			9.294												7.79886e+06	18613					3.44959e+06	108183		4	#DIV/0!	#DIV/0!	#DIV/0!	1	0.5	0	2	108183	#VALUE!	#VALUE!	#VALUE!	31.8866	1	#VALUE!	3557770	#VALUE!	#VALUE!	#VALUE!	0.969593	0.0304075	#VALUE!
593	features782			9.295												356559			2788.57		1469.14	80371.1	2239.14		5	1	0	0.5	0.333333	0.25	0	4	1469.14	1.89809	#VALUE!	1	54.7061	1.52412	#VALUE!	86868	0.0321013	#VALUE!	0.0169124	0.92521	0.0257764	#VALUE!
594	features784			9.3												93950076			73218.6	15959.4		2.48277e+07	7902		5	1	0.5	0	0.333333	0.25	0	4	7902	9.26583	2.01967	0	3141.95	1	0	2.49248e+07	0.00293758	0.000640303	0	0.996105	0.000317034	0
595	features785			9.301												253889						61443.6			2	#DIV/0!	#DIV/0!	#DIV/0!	1	0	0	1	61443.6	#VALUE!	0	0	1	#VALUE!	#VALUE!	61443.6	#VALUE!	0	0	1	#VALUE!	#VALUE!
596	features786			9.303												2.07033e+06			2681.43		310	753347	4833.71		5	1	0	0.5	0.333333	0.25	0	4	310	8.64977	#VALUE!	1	2430.15	15.5926	#VALUE!	761173	0.00352276	#VALUE!	0.000407266	0.98972	0.00635035	#VALUE!
597	features787			9.304												449541						96363.7	22163.4		3	#DIV/0!	#DIV/0!	#DIV/0!	1	0.5	0	2	22163.4	#VALUE!	#VALUE!	#VALUE!	4.34787	1	#VALUE!	118527	#VALUE!	#VALUE!	#VALUE!	0.81301	0.18699	#VALUE!
598	features788			9.315												316016			19084.9	65920.3	2884.86		2794.29		5	1	0.5	0.333333	0	0.25	0	4	2794.29	6.82996	23.5911	1.03241	#VALUE!	1	#VALUE!	90684.3	0.210454	0.726921	0.0318121	#VALUE!	0.0308133	#VALUE!
599	features789			9.315												6.10853e+06	8840.5		31770.9	5193.71		1.28284e+06			5	1	0.5	0	0.333333	0	0	3	5193.71	6.11717	1	#VALUE!	246.998	#VALUE!	#VALUE!	1.3198e+06	0.0240725	0.00393523	#VALUE!	0.971992	#VALUE!	#VALUE!
600	features790			9.317												554591			29656			55411.7			3	1	0	0	0.5	0	0	2	29656	1	#VALUE!	#VALUE!	1.86848	#VALUE!	#VALUE!	85067.7	0.348616	#VALUE!	#VALUE!	0.651384	#VALUE!	#VALUE!
601	features791			9.318												160899			4114.86	671.429		32717.7	3200.86	1331.43	6	1	0.5	0	0.333333	0.25	0.2	5	671.429	6.12851	1	#VALUE!	48.7285	4.76723	1.98298	42036.3	0.0978882	0.0159726	#VALUE!	0.778321	0.0761451	0.0316733
602	features792			9.321												160899	3528		4114.86	671.429	322.571	32717.7	3200.86		7	1	0.5	0.333333	0.25	0.2	0	5	322.571	12.7564	2.08149	1	101.428	9.92294	#VALUE!	41027.4	0.100295	0.0163654	0.00786234	0.79746	0.0780175	#VALUE!
603	features793			9.323												1.4177e+06			22849.3			15277	28736.7		4	1	0	0	0.5	0.333333	0	3	15277	1.49567	0	#VALUE!	1	1.88104	0	66863	0.341733	0	#VALUE!	0.228482	0.429785	0
604	features794			9.324												318393	2155				286.571	88693.4	55496.6		5	#DIV/0!	#DIV/0!	1	0.5	0.333333	0	3	286.571	#VALUE!	#VALUE!	1	309.499	193.657	#VALUE!	144477	#VALUE!	#VALUE!	0.00198351	0.613895	0.384122	#VALUE!
605	features795			9.334												7544.29				530.286		19074.9	55451.4		4	#DIV/0!	1	0	0.5	0.333333	0	3	530.286	#VALUE!	1	#VALUE!	35.9709	104.569	#VALUE!	75056.6	#VALUE!	0.00706515	#VALUE!	0.25414	0.738795	#VALUE!
606	features796			9.349												158306	2552		5601.43	671.143	340.571	856850	1421866		7	1	0.5	0.333333	0.25	0.2	0	5	340.571	16.4471	1.97064	1	2515.92	4174.94	#VALUE!	2.28533e+06	0.00245104	0.000293674	0.000149025	0.374935	0.622171	#VALUE!
607	features797			9.364												277415	2636.5					91410.3			3	#DIV/0!	#DIV/0!	#DIV/0!	1	0	0	1	91410.3	0	0	#VALUE!	1	#VALUE!	#VALUE!	91410.3	0	0	#VALUE!	1	#VALUE!	#VALUE!
608	features799			9.367												204263	11400.5					68622.4	52410.4		4	#DIV/0!	#DIV/0!	#DIV/0!	1	0.5	0	2	52410.4	#VALUE!	0	0	1.30933	1	#VALUE!	121033	#VALUE!	0	0	0.566974	0.433026	#VALUE!
609	features800			9.37												958601	1884					47826.4	7544.07		4	#DIV/0!	#DIV/0!	#DIV/0!	1	0.5	0	2	7544.07	#VALUE!	0	#VALUE!	6.33959	1	#VALUE!	55370.4	#VALUE!	0	#VALUE!	0.863753	0.136247	#VALUE!
610	features801			9.371															587371			1.57502e+06	1.46905e+06		3	1	0	0	0.5	0.333333	0	3	587371	1	#VALUE!	#VALUE!	2.68147	2.50106	0	3.63144e+06	0.161746	#VALUE!	#VALUE!	0.433718	0.404536	0
611	features802			9.379												35021.4	36465					168480	226555		4	#DIV/0!	#DIV/0!	#DIV/0!	1	0.5	0	2	168480	0	0	0	1	1.3447	#VALUE!	395035	0	0	0	0.426494	0.573506	#VALUE!
612	features803			9.381												2.58275e+06			250836			170599	541824		4	1	0	0	0.5	0.333333	0	3	170599	1.47032	#VALUE!	#VALUE!	1	3.176	#VALUE!	963259	0.260403	#VALUE!	#VALUE!	0.177106	0.56249	#VALUE!
613	features805			9.382												34783.5							12429.2		2	#DIV/0!	#DIV/0!	#DIV/0!	#DIV/0!	1	0	1	12429.2	0	0	#VALUE!	0	1	#VALUE!	12429.2	0	0	#VALUE!	0	1	#VALUE!
614	features806			9.386												1.07602e+06	404429		167498			437763	1.26013e+06	67912.6	6	1	0	0	0.5	0.333333	0.25	4	67912.6	2.46637	#VALUE!	#VALUE!	6.44598	18.5552	1	1.93331e+06	0.086638	#VALUE!	#VALUE!	0.226433	0.651802	0.0351277
615	features807			9.388												4.70319e+06	5293			3054.57		792308	15150.3		5	#DIV/0!	1	0	0.5	0.333333	0	3	3054.57	#VALUE!	1	#VALUE!	259.384	4.95987	#VALUE!	810513	#VALUE!	0.00376869	#VALUE!	0.977539	0.0186922	#VALUE!
616	features808			9.389												558964			465534			29050.3	38038		4	1	0	0	0.5	0.333333	0	3	29050.3	16.0251	#VALUE!	#VALUE!	1	1.30938	#VALUE!	532622	0.874041	#VALUE!	#VALUE!	0.054542	0.0714165	#VALUE!
617	features809			9.39												471265			5807.57			841164			3	1	0	0	0.5	0	0	2	5807.57	1	0	#VALUE!	144.839	#VALUE!	#VALUE!	846972	0.00685687	0	#VALUE!	0.993143	#VALUE!	#VALUE!
618	features810			9.391												50061.4			3230.29			3818.57	49780.3	1007.14	5	1	0	0	0.5	0.333333	0.25	4	1007.14	3.20738	#VALUE!	#VALUE!	3.79149	49.4272	1	57836.3	0.0558522	#VALUE!	#VALUE!	0.0660238	0.86071	0.0174137
619	features811			9.393															4.25559e+06			106795			2	1	0	0	0.5	0	0	2	106795	39.8483	0	0	1	#VALUE!	0	4.36239e+06	0.975519	0	0	0.0244808	#VALUE!	0
620	features813			9.396													36465					168480	226555		3	#DIV/0!	#DIV/0!	#DIV/0!	1	0.5	0	2	168480	0	0	0	1	1.3447	#VALUE!	395035	0	0	0	0.426494	0.573506	#VALUE!
621	features814			9.398												76263.1			611268	37317.4					3	1	0.5	0	0	0	0	2	37317.4	16.3802	1	0	#VALUE!	#VALUE!	#VALUE!	648585	0.942463	0.0575367	0	#VALUE!	#VALUE!	#VALUE!
622	features815			9.4															249977			1317.43			2	1	0	0	0.5	0	0	2	1317.43	189.746	#VALUE!	#VALUE!	1	#VALUE!	#VALUE!	251294	0.994757	#VALUE!	#VALUE!	0.00524257	#VALUE!	#VALUE!
623	features818			9.409												471265	447925					841164	1017335		4	#DIV/0!	#DIV/0!	#DIV/0!	1	0.5	0	2	841164	#VALUE!	#VALUE!	#VALUE!	1	1.20944	0	1.8585e+06	#VALUE!	#VALUE!	#VALUE!	0.452604	0.547396	0
624	features819			9.425												61079.4			10377.7			22452	87794.3		4	1	0	0	0.5	0.333333	0	3	10377.7	1	#VALUE!	#VALUE!	2.16348	8.45989	0	120624	0.0860336	#VALUE!	#VALUE!	0.186132	0.727834	0
625	features820			9.429											252		9556		84985.4	1156			696200	19659.4	5	1	0.5	0	0	0.333333	0.25	4	1156	73.5168	1	#VALUE!	#VALUE!	602.249	17.0064	802001	0.105967	0.00144139	#VALUE!	#VALUE!	0.868079	0.024513
626	features821			9.442												147768	11771								2	#DIV/0!	#DIV/0!	#DIV/0!	#DIV/0!	#DIV/0!	#DIV/0!	0	0	#DIV/0!	#VALUE!	#VALUE!	#DIV/0!	#VALUE!	#DIV/0!	0	#DIV/0!	#VALUE!	#VALUE!	#DIV/0!	#VALUE!	#DIV/0!
628	features824			9.488															279547			802198			2	1	0	0	0.5	0	0	2	279547	1	#VALUE!	#VALUE!	2.86964	#VALUE!	0	1.08174e+06	0.258422	#VALUE!	#VALUE!	0.741578	#VALUE!	0
629	features825			9.489												1.71382e+06					100739				2	#DIV/0!	#DIV/0!	1	0	0	0	1	100739	0	0	1	#VALUE!	0	0	100739	0	0	1	#VALUE!	0	0
630	features826			9.493												828609					71235.7	37177.7			3	#DIV/0!	#DIV/0!	1	0.5	0	0	2	37177.7	0	#VALUE!	1.91609	1	0	#VALUE!	108413	0	#VALUE!	0.657075	0.342925	0	#VALUE!
631	features827			9.496												88787.7					4619.43		15568.3		3	#DIV/0!	#DIV/0!	1	0	0.5	0	2	4619.43	#VALUE!	#VALUE!	1	#VALUE!	3.37018	#VALUE!	20187.7	#VALUE!	#VALUE!	0.228824	#VALUE!	0.771176	#VALUE!
632	features828			9.498												624134			224292	35011			63477		4	1	0.5	0	0	0.333333	0	3	35011	6.40634	1	#VALUE!	#VALUE!	1.81306	0	322780	0.694876	0.108467	#VALUE!	#VALUE!	0.196657	0
633	features829			9.499															498480			1.43409e+06	1.44311e+06		3	1	0	0	0.5	0.333333	0	3	498480	1	#VALUE!	#VALUE!	2.87692	2.89502	0	3.37568e+06	0.147668	#VALUE!	#VALUE!	0.424829	0.427502	0
634	features830			9.5												197995			106201	18483		13882.4	37139.6		5	1	0.5	0	0.333333	0.25	0	4	13882.4	7.65005	1.3314	#VALUE!	1	2.67529	0	175706	0.604425	0.105193	#VALUE!	0.0790093	0.211373	0
635	features831			9.502												3.99862e+06			113055	30431.4			35254.6		4	1	0.5	0	0	0.333333	0	3	30431.4	3.71506	1	#VALUE!	#VALUE!	1.15849	#VALUE!	178741	0.632506	0.170255	#VALUE!	#VALUE!	0.197239	#VALUE!
636	features832			9.502												624134			224292	35011		145447	63477		5	1	0.5	0	0.333333	0.25	0	4	35011	6.40634	1	#VALUE!	4.15433	1.81306	0	468228	0.479024	0.0747734	#VALUE!	0.310634	0.135569	0
637	features833			9.504															494942			1.43055e+06	1.43957e+06		3	1	0	0	0.5	0.333333	0	3	494942	1	#VALUE!	#VALUE!	2.89034	2.90857	0	3.36507e+06	0.147083	#VALUE!	#VALUE!	0.425118	0.427799	0
638	features834			9.505												266794			320782			24786.9	13474.9	798	5	1	0	0	0.5	0.333333	0.25	4	798	401.982	#VALUE!	#VALUE!	31.0612	16.8858	1	359842	0.891453	#VALUE!	#VALUE!	0.0688827	0.0374466	0.00221764
639	features835			9.51												2.47277e+06					375894				2	#DIV/0!	#DIV/0!	1	0	0	0	1	375894	#VALUE!	#VALUE!	1	#VALUE!	#VALUE!	#VALUE!	375894	#VALUE!	#VALUE!	1	#VALUE!	#VALUE!	#VALUE!
640	features839			9.522												86957.1	1213.5				830.857	2572.86	40271.1		5	#DIV/0!	#DIV/0!	1	0.5	0.333333	0	3	830.857	#VALUE!	#VALUE!	1	3.09663	48.4694	#VALUE!	43674.9	#VALUE!	#VALUE!	0.0190237	0.0589093	0.922067	#VALUE!
641	features840			9.526															429602			950142	745990		3	1	0	0	0.5	0.333333	0	3	429602	1	0	0	2.21168	1.73647	0	2.12573e+06	0.202096	0	0	0.446971	0.350933	0
642	features841			9.526															452504			653733	576026		3	1	0	0	0.5	0.333333	0	3	452504	1	0	#VALUE!	1.4447	1.27297	0	1.68226e+06	0.268985	0	#VALUE!	0.388603	0.342411	0
643	features843			9.533															106932			551463	456396		3	1	0	0	0.5	0.333333	0	3	106932	1	0	0	5.15714	4.2681	0	1.11479e+06	0.0959211	0	0	0.494678	0.409401	0
644	features844			9.533												22471.9			145304			435922	369204		4	1	0	0	0.5	0.333333	0	3	145304	1	0	0	3.00007	2.54091	0	950430	0.152882	0	0	0.458658	0.38846	0
645	features845			9.536															137013			343068	333472		3	1	0	0	0.5	0.333333	0	3	137013	1	#VALUE!	#VALUE!	2.50391	2.43387	0	813553	0.168413	#VALUE!	#VALUE!	0.421691	0.409896	0
646	features847			9.542												121424			45503.7	7203.71		41022.9	32903.4		5	1	0.5	0	0.333333	0.25	0	4	7203.71	6.3167	1	#VALUE!	5.69468	4.56756	#VALUE!	126634	0.359333	0.0568862	#VALUE!	0.323949	0.259832	#VALUE!
647	features848			9.543															331729			746115	625810		3	1	0	0	0.5	0.333333	0	3	331729	1	0	0	2.24917	1.88651	0	1.70365e+06	0.194716	0	0	0.43795	0.367334	0
648	features850			9.545												36505.9			184688			348336	365334		4	1	0	0	0.5	0.333333	0	3	184688	1	0	#VALUE!	1.88608	1.97811	0	898359	0.205584	0	#VALUE!	0.387748	0.406668	0
649	features851			9.545															55570.9			80166.6	69436.9		3	1	0	0	0.5	0.333333	0	3	55570.9	1	#VALUE!	#VALUE!	1.4426	1.24952	0	205174	0.270847	#VALUE!	#VALUE!	0.390724	0.338429	0
650	features852			9.547												1128620			89441.1			15015.1	226909	11659.1	5	1	0	0	0.5	0.333333	0.25	4	11659.1	7.67133	#VALUE!	#VALUE!	1.28784	19.4619	1	343024	0.260743	#VALUE!	#VALUE!	0.0437728	0.661495	0.0339893
651	features853			9.555												108388			1.61799e+06			2.52382e+06	2.10658e+06		4	1	0	0	0.5	0.333333	0	3	1.61799e+06	1	0	0	1.55985	1.30198	0	6.24839e+06	0.258945	0	0	0.403916	0.33714	0
652	features854			9.56												1.14934e+07	1085		15540	16046	286.571	4.6814e+06	21907.7		7	1	0.5	0.333333	0.25	0.2	0	5	286.571	54.2273	55.993	1	16335.9	76.4477	#VALUE!	4.73518e+06	0.00328182	0.00338868	6.05196e-05	0.988642	0.00462659	#VALUE!
653	features855			9.561												210201				4530.86	375.143	113791	7015.71	2695.43	6	#DIV/0!	1	0.5	0.333333	0.25	0.2	5	375.143	#VALUE!	12.0777	1	303.328	18.7014	7.18507	128409	#VALUE!	0.0352847	0.00292148	0.886167	0.0546359	0.020991
654	features856			9.562												198532			48094.9			14419.4	37676.6		4	1	0	0	0.5	0.333333	0	3	14419.4	3.33542	#VALUE!	#VALUE!	1	2.6129	0	100191	0.480032	#VALUE!	#VALUE!	0.14392	0.376048	0
655	features857			9.563												167407						36155.7	36908.9		3	#DIV/0!	#DIV/0!	#DIV/0!	1	0.5	0	2	36155.7	#VALUE!	#VALUE!	#VALUE!	1	1.02083	#VALUE!	73064.6	#VALUE!	#VALUE!	#VALUE!	0.494846	0.505154	#VALUE!
656	features858			9.564												294634	1132.5		1947.14			34862.9	818		5	1	0	0	0.5	0.333333	0	3	818	2.38037	#VALUE!	#VALUE!	42.6196	1	#VALUE!	37628	0.0517472	#VALUE!	#VALUE!	0.926514	0.0217391	#VALUE!
657	features859			9.567												78578							16902	5395.14	3	#DIV/0!	#DIV/0!	#DIV/0!	#DIV/0!	1	0.5	2	5395.14	#VALUE!	0	#VALUE!	#VALUE!	3.13282	1	22297.1	#VALUE!	0	#VALUE!	#VALUE!	0.758034	0.241966
658	features860			9.57												292539			22389.1			87667.4	25644		4	1	0	0	0.5	0.333333	0	3	22389.1	1	0	#VALUE!	3.91562	1.14538	#VALUE!	135701	0.164989	0	#VALUE!	0.646036	0.188975	#VALUE!
659	features861			9.571															47012.6			28108.6	13433.7		3	1	0	0	0.5	0.333333	0	3	13433.7	3.4996	0	0	2.09239	1	0	88554.9	0.530886	0	0	0.317414	0.151699	0
660	features862			9.572												7991.57			3787				17501.9		3	1	0	0	0	0.5	0	2	3787	1	0	#VALUE!	0	4.62156	0	21288.9	0.177886	0	#VALUE!	0	0.822114	0
661	features863			9.574												58416	4794					54434.3	59561.4		4	#DIV/0!	#DIV/0!	#DIV/0!	1	0.5	0	2	54434.3	0	0	0	1	1.09419	#VALUE!	113996	0	0	0	0.477512	0.522488	#VALUE!
662	features864			9.575												296233			26083.1	3384.86		91361.4	29338		5	1	0.5	0	0.333333	0.25	0	4	3384.86	7.70583	1	#VALUE!	26.9912	8.66743	#VALUE!	150167	0.173694	0.0225406	#VALUE!	0.608397	0.195369	#VALUE!
663	features867			9.594												1.06876e+06						307317	66580.9		3	#DIV/0!	#DIV/0!	#DIV/0!	1	0.5	0	2	66580.9	#VALUE!	#VALUE!	#VALUE!	4.6157	1	#VALUE!	373898	#VALUE!	#VALUE!	#VALUE!	0.821928	0.178072	#VALUE!
664	features869			9.597												179026						61625.7	2073.43		3	#DIV/0!	#DIV/0!	#DIV/0!	1	0.5	0	2	2073.43	#VALUE!	#VALUE!	#VALUE!	29.7216	1	#VALUE!	63699.1	#VALUE!	#VALUE!	#VALUE!	0.96745	0.0325503	#VALUE!
665	features870			9.608													4290.5			42661.4		2373134	47484.6		4	#DIV/0!	1	0	0.5	0.333333	0	3	42661.4	0	1	#VALUE!	55.6272	1.11306	#VALUE!	2463280	0	0.017319	#VALUE!	0.963404	0.019277	#VALUE!
667	features872			9.619												852617						1.37899e+06	27688.6		3	#DIV/0!	#DIV/0!	#DIV/0!	1	0.5	0	2	27688.6	#VALUE!	#VALUE!	#VALUE!	49.8035	1	#VALUE!	1406676	#VALUE!	#VALUE!	#VALUE!	0.980316	0.0196837	#VALUE!
668	features874			9.629												2.2948e+06	34895		2.05104e+06				187897		4	1	0	0	0	0.5	0	2	187897	10.9157	#VALUE!	#VALUE!	#VALUE!	1	#VALUE!	2.23894e+06	0.916077	#VALUE!	#VALUE!	#VALUE!	0.0839226	#VALUE!
669	features875			9.63												525914			779009			208748			3	1	0	0	0.5	0	0	2	208748	3.73181	#VALUE!	#VALUE!	1	#VALUE!	#VALUE!	987758	0.788664	#VALUE!	#VALUE!	0.211336	#VALUE!	#VALUE!
670	features876			9.633																		1.06708e+06	297510		2	#DIV/0!	#DIV/0!	#DIV/0!	1	0.5	0	2	297510	#VALUE!	#VALUE!	#VALUE!	3.58669	1	#VALUE!	1.36459e+06	#VALUE!	#VALUE!	#VALUE!	0.781978	0.218022	#VALUE!
671	features878			9.636												238257			1685.43		404.571	97134.9		707.429	5	1	0	0.5	0.333333	0	0.25	4	404.571	4.16596	#VALUE!	1	240.093	#VALUE!	1.74859	99932.3	0.0168657	#VALUE!	0.00404846	0.972007	#VALUE!	0.00707908
672	features879			9.641												1.12775e+06			3822.57		89023.1	129318			4	1	0	0.5	0.333333	0	0	3	3822.57	1	0	23.2888	33.83	0	0	222163	0.0172061	0	0.40071	0.582084	0	0
673	features880			9.642												234847			4974.71			72459.9	4468.43		4	1	0	0	0.5	0.333333	0	3	4468.43	1.1133	0	0	16.216	1	#VALUE!	81903	0.0607391	0	0	0.884703	0.0545576	#VALUE!
674	features881			9.643												234847			4974.71			72459.9			3	1	0	0	0.5	0	0	2	4974.71	1	#VALUE!	0	14.5656	#VALUE!	#VALUE!	77434.6	0.0642441	#VALUE!	0	0.935756	#VALUE!	#VALUE!
675	features882			9.645												482657	4530.5		2160.29	1029.14	24463.1	90546.6	12564		7	1	0.5	0.333333	0.25	0.2	0	5	1029.14	2.09911	1	23.7704	87.9825	12.2082	#VALUE!	130763	0.0165206	0.00787028	0.18708	0.692447	0.0960821	#VALUE!
676	features883			9.651												387527					34450.6	41586.9			3	#DIV/0!	#DIV/0!	1	0.5	0	0	2	34450.6	#VALUE!	#VALUE!	1	1.20715	#VALUE!	#VALUE!	76037.4	#VALUE!	#VALUE!	0.453074	0.546926	#VALUE!	#VALUE!
677	features884			9.66												5509.86						16068.7	1.33202e+07	3706.14	4	#DIV/0!	#DIV/0!	#DIV/0!	1	0.5	0.333333	3	3706.14	0	0	#VALUE!	4.3357	3594.08	1	1.33399e+07	0	0	#VALUE!	0.00120456	0.998518	0.000277823
678	features885			9.669												3.25981e+06			108536		240531	176351			4	1	0	0.5	0.333333	0	0	3	108536	1	#VALUE!	2.21613	1.62481	#VALUE!	#VALUE!	525418	0.206571	#VALUE!	0.457789	0.33564	#VALUE!	#VALUE!
679	features886			9.673												2.22132e+06	6799		208901		5033				4	1	0	0.5	0	0	0	2	5033	41.5063	#VALUE!	1	#VALUE!	#VALUE!	#VALUE!	213934	0.976474	#VALUE!	0.0235259	#VALUE!	#VALUE!	#VALUE!
680	features888			9.7															10252.6	2427.43		69600.3	236137		4	1	0.5	0	0.333333	0.25	0	4	2427.43	4.22363	1	#VALUE!	28.6724	97.2786	#VALUE!	318417	0.0321986	0.00762342	#VALUE!	0.218582	0.741596	#VALUE!
681	features889			9.704											1106	2.22642e+06	9362.5				10128	626821			4	#DIV/0!	#DIV/0!	1	0.5	0	0	2	10128	#VALUE!	#VALUE!	1	61.8899	#VALUE!	#VALUE!	636949	#VALUE!	#VALUE!	0.0159008	0.984099	#VALUE!	#VALUE!
682	features890			9.705												2.22642e+06	9362.5				10128	626821		2663.14	5	#DIV/0!	#DIV/0!	1	0.5	0	0.333333	3	2663.14	#VALUE!	#VALUE!	3.80303	235.369	#VALUE!	1	639612	#VALUE!	#VALUE!	0.0158346	0.980002	#VALUE!	0.00416369
683	features892			9.71												4.5629e+06						1.15618e+06			2	#DIV/0!	#DIV/0!	#DIV/0!	1	0	0	1	1.15618e+06	#VALUE!	#VALUE!	#VALUE!	1	#VALUE!	#VALUE!	1.15618e+06	#VALUE!	#VALUE!	#VALUE!	1	#VALUE!	#VALUE!
684	features893			9.717												8511.43						27997.7	66616.9		3	#DIV/0!	#DIV/0!	#DIV/0!	1	0.5	0	2	27997.7	#VALUE!	#VALUE!	#VALUE!	1	2.37937	#VALUE!	94614.6	#VALUE!	#VALUE!	#VALUE!	0.295913	0.704087	#VALUE!
685	features894			9.727															115679			90869.4	45388.9		3	1	0	0	0.5	0.333333	0	3	45388.9	2.54863	#VALUE!	#VALUE!	2.00202	1	#VALUE!	251938	0.459159	#VALUE!	#VALUE!	0.360682	0.180159	#VALUE!
686	features895			9.728												604144						125175			2	#DIV/0!	#DIV/0!	#DIV/0!	1	0	0	1	125175	#VALUE!	#VALUE!	#VALUE!	1	#VALUE!	#VALUE!	125175	#VALUE!	#VALUE!	#VALUE!	1	#VALUE!	#VALUE!
687	features896			9.734												47237.1			5618.86	1408		375856	27739.4		5	1	0.5	0	0.333333	0.25	0	4	1408	3.99067	1	#VALUE!	266.943	19.7013	#VALUE!	410622	0.0136838	0.00342894	#VALUE!	0.915333	0.0675547	#VALUE!
688	features897			9.744												1.03696e+06	2096								2	#DIV/0!	#DIV/0!	#DIV/0!	#DIV/0!	#DIV/0!	#DIV/0!	0	0	#VALUE!	#DIV/0!	#VALUE!	#VALUE!	#VALUE!	#VALUE!	0	#VALUE!	#DIV/0!	#VALUE!	#VALUE!	#VALUE!	#VALUE!
689	features898			9.745												5.61454e+06			7487.71			1.73479e+06	16800.6		4	1	0	0	0.5	0.333333	0	3	7487.71	1	0	#VALUE!	231.685	2.24375	0	1.75908e+06	0.00425662	0	#VALUE!	0.986193	0.00955079	0
[truncated: 885 more rows]

## Sheet: Table 6 Quantification
Table S6. Quantification of CL1 chemicals confirmed during normal use (12 compounds) and pyrolysis (20 compounds), and associated emission estimates.
[truncated: 27 more rows]
[truncated: 25 more columns]

[truncated: 2 more sheets: Table S7 Comparison , Table S8 OLED Production]
